# Supplementary material for: Regioselective palladium-catalyzed intramolecular oxidative aminofluorination of unactivated alkenes
Source: Royal Society of Chemistry journal article supplement (doi:10.1039/c3cc44711a), 2013-01-01
Supplement: c3cc44711a.pdf [file c3cc44711a.pdf]

## Supporting Information

for

# **Regioselective Palladium-Catalyzed Intramolecular Oxidative Aminofluorination of Unactivated Alkenes**

Tao Wu, Jiashun Cheng, Pinhong Chen and Guosheng Liu\*.

*State Key Laboratory of Organometallics Chemistry, Shanghai Institute of Organic  
Chemistry, Chinese Academy of Sciences, 345 Lingling Road, Shanghai, China,  
200032*

Email: [gliu@mail.sioc.ac.cn](mailto:gliu@mail.sioc.ac.cn)

## **General Procedures and New Compounds Characterization**

### **Content:**

- 1. General Consideration**
- 2. General Procedure for Aminofluorination of Substrates**
- 3. Mechanistic studies**
- 4. Procedure of Substrate Synthesis**
- 5. New compounds characterization**
- 6. References**

## 1. General Considerations.

All commercially available compounds were used as received.  $^1\text{H}$  and  $^{13}\text{C}$  spectroscopy were recorded on a Varian Mercury-400 MHz (400 MHz for  $^1\text{H}$ ; 376 MHz for  $^{19}\text{F}$ ; 100 MHz for  $^{13}\text{C}$ ) or a Bucker Avance-300 MHz (300 MHz for  $^1\text{H}$ ; 282 MHz for  $^{19}\text{F}$ ; 75 MHz for  $^{13}\text{C}$ ) spectrometer.  $\text{CDCl}_3$  was purchased from J&K. The chemical shifts ( $\delta$ ) are given in parts per million relative to internal standard TMS (0 ppm for  $^1\text{H}$ ),  $\text{CDCl}_3$  (77.0 ppm for  $^{13}\text{C}$ ). Flash column chromatography was performed on silica gel 60 (particle size 200-400 mesh ASTM, purchased from Yantai, China) and eluted with petroleum ether/ethyl acetate. All solvents were dried and purified according to the procedure from 'Purification of Laboratory Chemicals book'. AgF was purchased from Aldrich. 1,1,1,3,3,3-hexafluoro-2-propanol(HFIP) was purchased from TCI. Compounds **1a-1i** (Table 2) and **4a-4m** (Table 3) were synthesized according to the reported procedures as below, and the NMR data were same with the reported literatures<sup>[S1][S2]</sup>.

## 2. General Procedure for Aminofluorination of Substrates

### 2.1 Screening of Substrates bearing Different Protecting Group:

In a dry glass tube,  $\text{Pd}(\text{OAc})_2$  catalyst (2.4 mg, 0.01 mmol), AgF (39 mg, 0.3 mmol), oxidant (0.2 mmol), alkene **1** (0.1 mmol) and  $\text{MgSO}_4$  (50 mg) were dissolved in 0.5 mL dry  $\text{CH}_3\text{CN}$ . The reaction mixture was stirred at room temperature for 24 h, then EtOAc (4.0 mL) was added and the mixture was stirred for ca.10 minutes, centrifuged and the filtrate was concentrated and analyzed by  $^1\text{H}$  NMR and  $^{19}\text{F}$  NMR with 2,2,2-trifluoro-*N,N*-dimethylacetamide as internal standard. The results were summarized in Table S1.

**Table S1.** Screening of Substrates.<sup>a</sup>

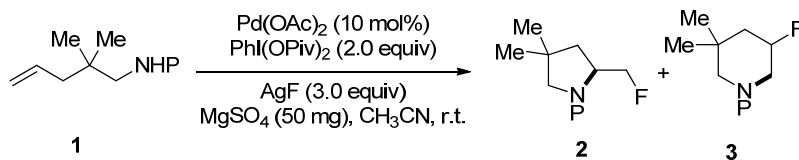

| Entry | PG (substrate)                    | Yield <sup>b</sup> |     |
|-------|-----------------------------------|--------------------|-----|
|       |                                   | 2                  | 3   |
| 1     | Ts( <b>S1a</b> )                  | 0                  | 84% |
| 2     | CH <sub>3</sub> CO ( <b>S1b</b> ) | 0                  | 0   |
| 3     | Boc ( <b>S1c</b> )                | 0                  | 0   |
| 4     | Cbz ( <b>S1d</b> )                | 0                  | 0   |
| 5     | CONMe <sub>2</sub> ( <b>1a</b> )  | 12%                | 0   |

All the reactions were conducted in 0.1 mmol scale.

## 2.2 General Procedure for Screening of Reaction Conditions of Substrate 1a:

In a dry glass tube, Pd catalyst (0.005 mmol), AgF (39 mg, 0.3 mmol), oxidant (0.3 mmol) and alkene **1a** (32 mg, 0.1 mmol) were dissolved in 0.5 mL solvent. Other additives were added according to the superscripts in the table S2. The reaction mixture was stirred at room temperature for 24 h, then EtOAc (4.0 mL) was added and the mixture was stirred for ca.10 minutes, centrifuged and the filtrate was concentrated and analyzed by <sup>1</sup>H NMR and <sup>19</sup>F NMR with 2,2,2-trifluoro-*N,N*-dimethylacetamide as internal standard. The results were summarized in Table S2.

In order to test the possibility of Bronsted acid or Lewis acid promoted aminofluorination of alkene mediated by hypervalent iodine, substrate **1a** was treated by TFAH or BF<sub>3</sub>•Et<sub>2</sub>O. However, no reaction occurred at all (see eq S1-2).

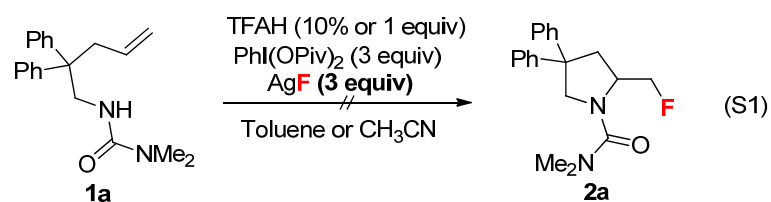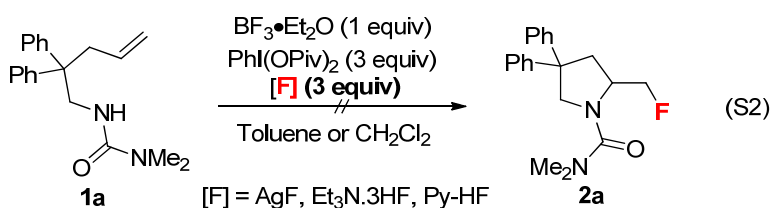

**Table S2.** Screening of reaction conditions. <sup>a</sup>

| Entry           | [Pd] (5 mol%)                         | Additive (equiv)      | Solvent            | Yield <sup>b</sup> |              |
|-----------------|---------------------------------------|-----------------------|--------------------|--------------------|--------------|
|                 |                                       |                       |                    | 2a                 | 3a           |
| 1               | Pd(OAc) <sub>2</sub>                  | —                     | CH <sub>3</sub> CN | 13%                | 26%          |
| 2               | Pd(OAc) <sub>2</sub>                  | —                     | EtOAc              | 19%                | 30%          |
| 3               | Pd(OAc) <sub>2</sub>                  | —                     | Benzene            | 49%                | 21%          |
| 4               | Pd(OAc) <sub>2</sub>                  | —                     | Toluene            | 51%                | 17%          |
| 5               | Pd(OAc) <sub>2</sub>                  | —                     | xylene             | 46%                | 23%          |
| 6               | PdCl <sub>2</sub> (MeCN) <sub>2</sub> | —                     | Toluene            | 44%                | 18%          |
| 7               | PdCl <sub>2</sub> (PhCN) <sub>2</sub> | —                     | Toluene            | 34%                | 13%          |
| 8               | Pd(dba) <sub>2</sub>                  | —                     | Toluene            | 50%                | 16%          |
| 9               | —                                     | —                     | Toluene            | 0                  | 0            |
| 10 <sup>c</sup> | Pd(OAc) <sub>2</sub>                  | —                     | Toluene            | 12%                | 65%          |
| 11 <sup>d</sup> | Pd(OAc) <sub>2</sub>                  | —                     | Toluene            | 21%                | 43%          |
| 12 <sup>e</sup> | Pd(OAc) <sub>2</sub>                  | —                     | Toluene            | 0                  | 0            |
| 13              | Pd(OAc) <sub>2</sub>                  | NaOPiv (1)            | Toluene            | 13%                | 12%          |
| 14              | Pd(OAc) <sub>2</sub>                  | HOPiv (1)             | Toluene            | 45%                | 34%          |
| 15              | Pd(OAc) <sub>2</sub>                  | HOBu <sup>f</sup> (1) | Toluene            | 60%                | 13%          |
| 16              | Pd(OAc) <sub>2</sub>                  | TFE (2.5)             | Toluene            | 62%                | 6%           |
| 17              | Pd(OAc) <sub>2</sub>                  | HFIP (2.5)            | Toluene            | 73%                | trace        |
| 18 <sup>f</sup> | <b>Pd(OAc)<sub>2</sub></b>            | <b>HFIP (2.5)</b>     | <b>Toluene</b>     | <b>81%</b>         | <b>trace</b> |

<sup>a</sup> Reaction condition: **1a** (0.1 mmol), [Pd] (5 mol %), PhI(OPiv)<sub>2</sub> (3 equiv), AgF (3 equiv), solvent (0.5 mL), at *r.t.* for 24 hr. <sup>b</sup> <sup>1</sup>H NMR yield with CF<sub>3</sub>-DMA as internal standard. <sup>c</sup> PhI(OAc)<sub>2</sub> (3 equiv). <sup>d</sup> PhI(O<sub>2</sub>CPh)<sub>2</sub> (3 equiv). <sup>e</sup> 1-Acetoxy-1,2-benziodoxol-3-(1H)-one (3 equiv). <sup>f</sup> 2-MeOBQ (1 equiv).

### 2.3 General Procedure for Aminofluorination of Substrates 1:

In a dry glass tube, Pd(OAc)<sub>2</sub> (2.3 mg, 0.01 mmol), AgF (76 mg, 0.6 mmol), PhI(OPiv)<sub>2</sub> (245 mg, 0.6 mmol), 2-Me-BQ (27 mg, 0.2 mmol), (CF<sub>3</sub>)<sub>2</sub>CHOH (HFIP) (55 μL, 0.5 mmol) and alkene **1** (0.2 mmol) were dissolved in 1.0 mL dry toluene. The reaction mixture was stirred at room temperature for 24 h, then filtered and the solid was washed by ethyl acetate. Combined filtrates were concentrated under vacuum. The residue was purified by column chromatography on silica gel with a gradient eluant of petroleum ether (or hexane) and ethyl acetate afforded the products **2**. The results were summarized in Table S3.

**Table S3.** Substrate scope of aminofluorination.<sup>a</sup>

| Entry       | Substrate                                                                                                                                                    | Product                                 | Yield <sup>b</sup>        |
|-------------|--------------------------------------------------------------------------------------------------------------------------------------------------------------|-----------------------------------------|---------------------------|
| 1<br>2      | <br><b>1a</b> R <sup>1</sup> = R <sup>2</sup> = Me<br><b>1b</b> R <sup>1</sup> = R <sup>2</sup> = <i>i</i> Pr                                                | <br><b>2a</b><br><b>2b</b>              | 82%<br>78%                |
| 3<br>4<br>5 | <br><b>1c</b> R <sup>1</sup> = R <sup>2</sup> = Me<br><b>1d</b> R <sup>1</sup> = R <sup>2</sup> = Bn<br><b>1e</b> R <sup>1</sup> = Me<br>R <sup>2</sup> = Ph | <br><b>2c</b><br><b>2d</b><br><b>2e</b> | 53%<br>63%<br>61%         |
| 6<br>7      | <br><b>1f</b> n = 0<br><b>1g</b> n = 1                                                                                                                       | <br><b>2f</b><br><b>2g</b>              | 47%<br>51%                |
| 8           | <br><b>1h</b>                                                                                                                                                | <br><b>2h</b>                           | 50%<br>(1/1) <sup>c</sup> |
| 9           | <br><b>1i</b>                                                                                                                                                | <br><b>2i</b>                           | 33%                       |

<sup>a</sup>All the reactions were conducted at 0.2 mmol scale, reaction condition is the same with entry 18 in table S2. <sup>b</sup>Isolated yield. <sup>c</sup>Diastereoselectivity.

#### 2.4 General Procedure for Screening of Reaction Conditions of Substrate 4a:

In a dry glass tube, Pd catalyst (0.005 mmol), AgF (38 mg, 0.3 mmol), PhI(OPiv)<sub>2</sub> (124 mg, 0.3 mmol), 2-MeO-BQ (14 mg, 0.1 mmol), (CF<sub>3</sub>)<sub>2</sub>CHOH (HFIP) (30 μL, 0.25 mmol) and alkene **4a** (24 mg, 0.1 mmol) were dissolved in 0.5 mL solvent. The reaction mixture was stirred at room temperature for 24 h, then EtOAc (4.0 mL) was added and the mixture was stirred for ca.10 minutes, centrifuged and the filtrate was

concentrated and analyzed by  $^1\text{H}$  NMR and  $^{19}\text{F}$  NMR with 2,2,2-trifluoro-*N,N*-dimethylacetamide as internal standard. The results were summarized in Table S4.

**Table S4.** Screening results of substrates **4a**.<sup>[a]</sup>

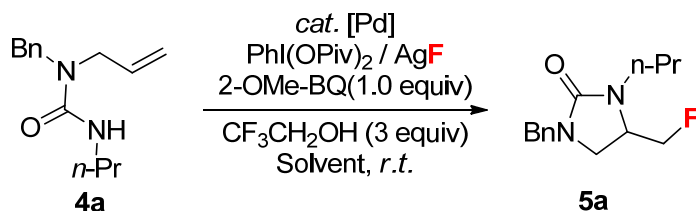

| Entry | [Pd] (5 mol%)                                      | Solvent                              | <b>5a</b> (Yield) <sup>b</sup> |
|-------|----------------------------------------------------|--------------------------------------|--------------------------------|
| 1     | Pd(OAc) <sub>2</sub>                               | Toluene                              | 61%                            |
| 2     | Pd(OTFA) <sub>2</sub>                              | Toluene                              | 72%                            |
| 3     | PdCl <sub>2</sub> (MeCN) <sub>2</sub>              | Toluene                              | 67%                            |
| 4     | PdCl <sub>2</sub> (PPh <sub>3</sub> ) <sub>2</sub> | Toluene                              | 53%                            |
| 5     | Pd(dba) <sub>2</sub>                               | Toluene                              | 65%                            |
| 6     | Pd(acac-F <sub>6</sub> ) <sub>2</sub>              | Toluene                              | 55%                            |
| 7     | –                                                  | Toluene                              | 0                              |
| 8     | Pd(OTFA) <sub>2</sub>                              | CHCl <sub>3</sub>                    | 61%                            |
| 9     | Pd(OTFA) <sub>2</sub>                              | Dioxane                              | 28%                            |
| 10    | Pd(OTFA) <sub>2</sub>                              | EtOAc                                | 43%                            |
| 11    | Pd(OTFA) <sub>2</sub>                              | ClCH <sub>2</sub> CH <sub>2</sub> Cl | 25%                            |
| 12    | Pd(OTFA) <sub>2</sub>                              | MeCN                                 | 38%                            |
| 13    | Pd(OTFA) <sub>2</sub>                              | C <sub>6</sub> H <sub>5</sub> OMe    | 61%                            |

<sup>a</sup> Reaction condition: **4a** (0.1 mmol), [Pd] (5 mol %), PhI(OPiv)<sub>2</sub> (3 equiv), AgF (3 equiv), 2-Me-BQ (1 equiv) and HFIP (3 equiv) in solvent (0.5 mL), at *r.t.* for 24 hr.

<sup>b</sup>  $^1\text{H}$  NMR yield with CF<sub>3</sub>-DMA as internal standard.

## 2.5 General Procedure for Aminofluorination of Substrates 4:

In a dry glass tube, Pd(OTFA)<sub>2</sub> (3.3 mg, 0.01 mmol), AgF (76 mg, 0.6 mmol), PhI(OPiv)<sub>2</sub> (125 mg, 0.6 mmol), 2-Me-BQ (28 mg, 0.2 mmol), (CF<sub>3</sub>)<sub>2</sub>CHOH (HFIP) (55 μL, 0.5 mmol) and alkene **4** (0.2 mmol) were dissolved in 1.0 mL dry toluene. The reaction mixture was stirred at room temperature for 24 h, then filtered and the solid was washed by ethyl acetate. Combined filtrates were concentrated under vacuum. The residue was purified by column chromatography on silica gel with a gradient eluant of petroleum ether (or hexane) and ethyl acetate afforded the products **5**. The results were summarized in Table S5.

**Table S5.** The *exo*-aminofluorination of substrates **4**.<sup>[a]</sup>

| Entry | Substrate | Product | Yield <sup>b</sup>        |
|-------|-----------|---------|---------------------------|
| 1     |           |         | 75%                       |
| 2     |           |         | 72%                       |
| 3     |           |         | 71%                       |
| 4     |           |         | 70%                       |
| 5     |           |         | 55%                       |
| 6     |           |         | 58%                       |
| 7     |           |         | 50%<br>(2:1) <sup>c</sup> |
| 8     |           |         | 56%                       |
| 9     |           |         | 80%                       |
| 10    |           |         | 66% <sup>d</sup>          |
| 11    |           |         | 56%<br>(2/1) <sup>c</sup> |
| 12    |           |         | 35%                       |

<sup>a</sup>Reaction condition: **4** (0.2 mmol), Pd(O<sub>2</sub>CCF<sub>3</sub>)<sub>2</sub> (5 mol %), PhI(OPiv)<sub>2</sub> (3 equiv), AgF (3 equiv), 2-MeO-BQ (1 equiv), (CF<sub>3</sub>)<sub>2</sub>CHOH (3 equiv) in Toluene (1.0 mL) at r.t. for 24 hours. <sup>b</sup>Isolated yield. <sup>c</sup>Diastereoselectivity. <sup>d</sup>d.r value > 20:1

### 3. Mechanistic studies

#### 3.1 Stereochemistry of Aminopalladation.

In order to get further mechanistic information of this transformation, diene substrate **4l** and the related deuterium labeled substrate *trans-d-4l* were synthesized (see Part **4.5**) and then applied it to the standard reaction condition as below: In a dry glass tube, Pd(OTFA)<sub>2</sub> (3.4 mg, 0.01 mmol), AgF (78 mg, 0.6 mmol), PhI(OPiv)<sub>2</sub> (245 mg, 0.6

mmol), 2-Me-BQ (28 mg, 0.2 mmol), (CF<sub>3</sub>)<sub>2</sub>CHOH (HFIP) (56 μL, 0.5 mmol) and alkene **4I** (47 mg, 0.2 mmol) or *trans-d-4I* (90% D, 49 mg, 0.2 mmol) were dissolved in 1.0 mL dry toluene. The reaction mixture was stirred at room temperature for 24 h, then filtered and the solid was washed by ethyl acetate. Combined filtrates were concentrated under vacuum. The residue was purified by column chromatography on silica gel with a gradient eluant of petroleum ether (or hexane) and ethyl acetate afforded the product **5I** 18 mg (35% yield) or *trans-d-4I* 16 mg (30% yield). The results were summarized in eq S3.

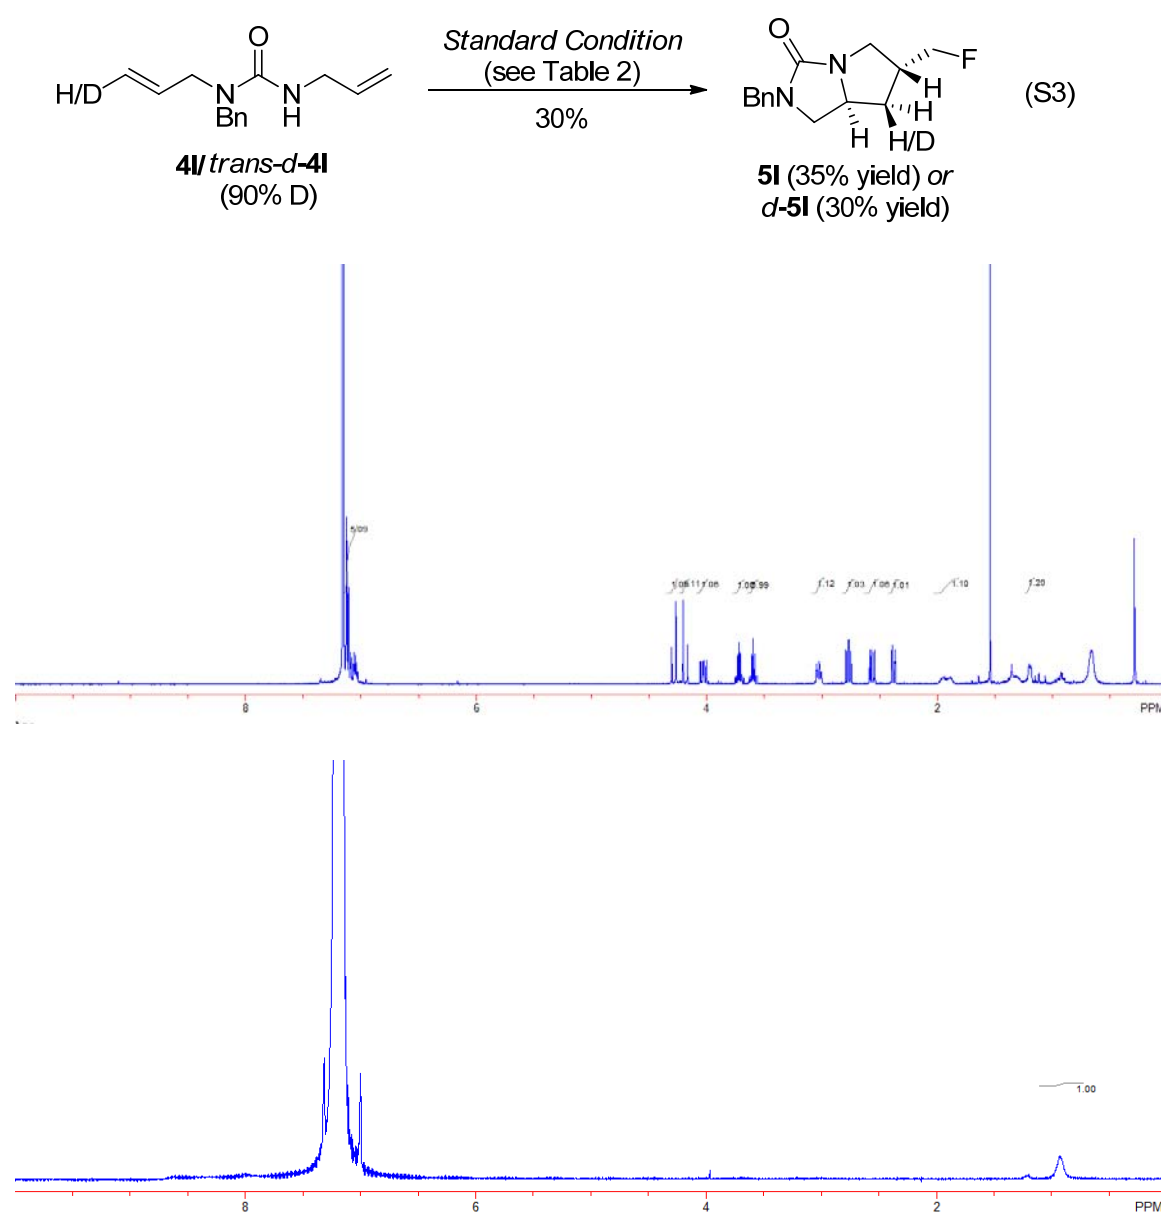

**Figure S1.** The <sup>1</sup>H NMR (top) and <sup>2</sup>D NMR (bottom) spectrum of product *d-5I*.  
**The characterization of compounds 5I and d-5I:**



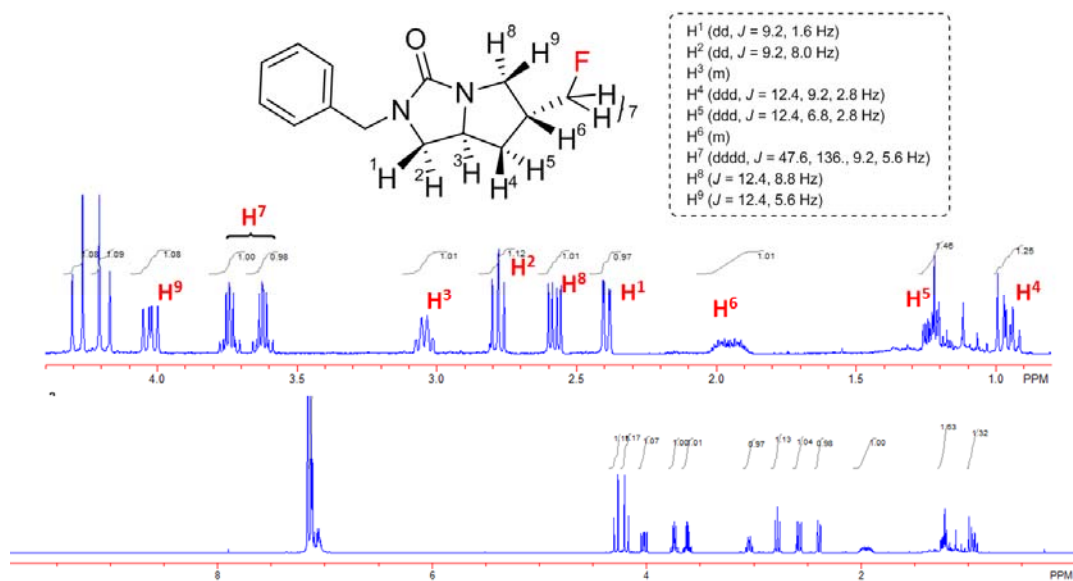

**Figure S2.** The <sup>1</sup>H NMR spectrum of product 5I.

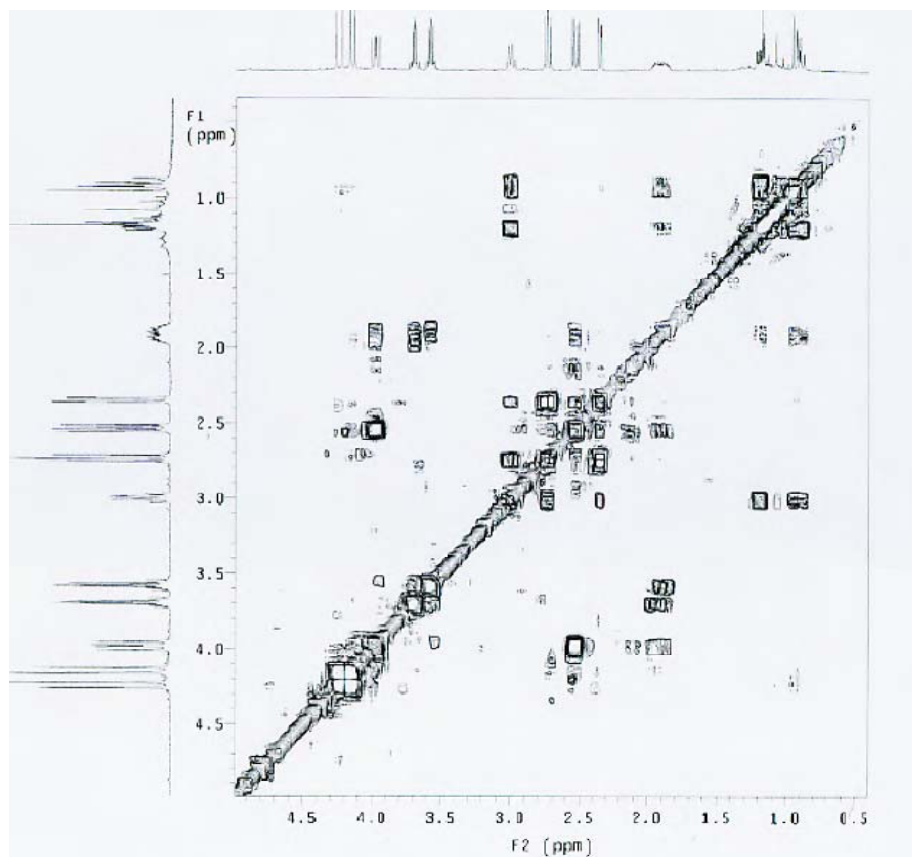

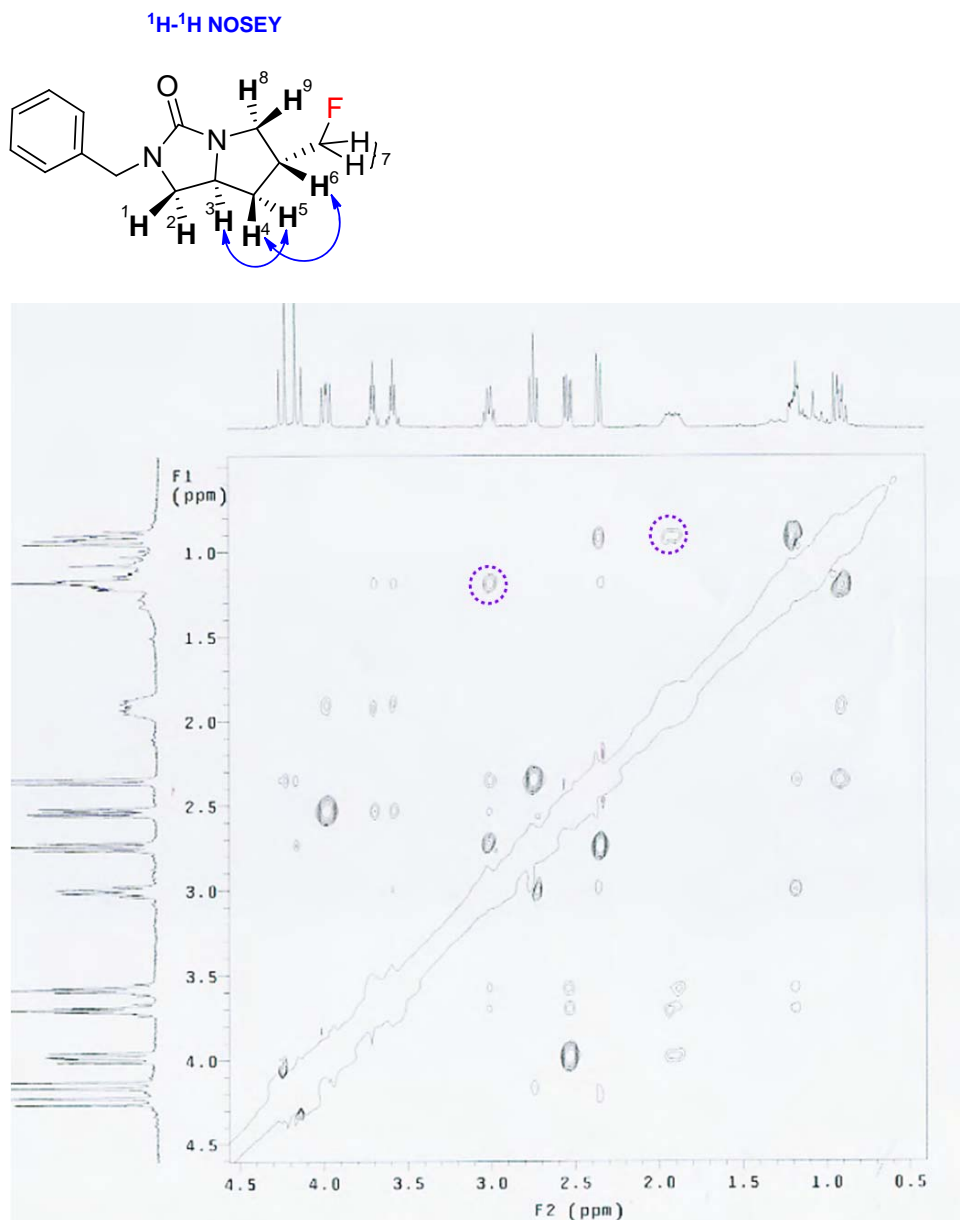

**Figure S3.** The <sup>1</sup>H-<sup>1</sup>H COSY (top) and <sup>1</sup>H-<sup>1</sup>H NOSEY (bottom) spectrum of product **5I**.

A possible catalytic cycle based on our above results is shown below: *trans*-aminopalladation of the alkene forms a primary *sp*<sup>3</sup> C–Pd bond, following subsequently second double bond insertion to generate a new *sp*<sup>3</sup> C–Pd bond. Finally, the oxidation of primary *sp*<sup>3</sup> C–Pd bond by PhI(OPiv)<sub>2</sub>/AgF to give C–F bond via a Pd(IV) intermediate.

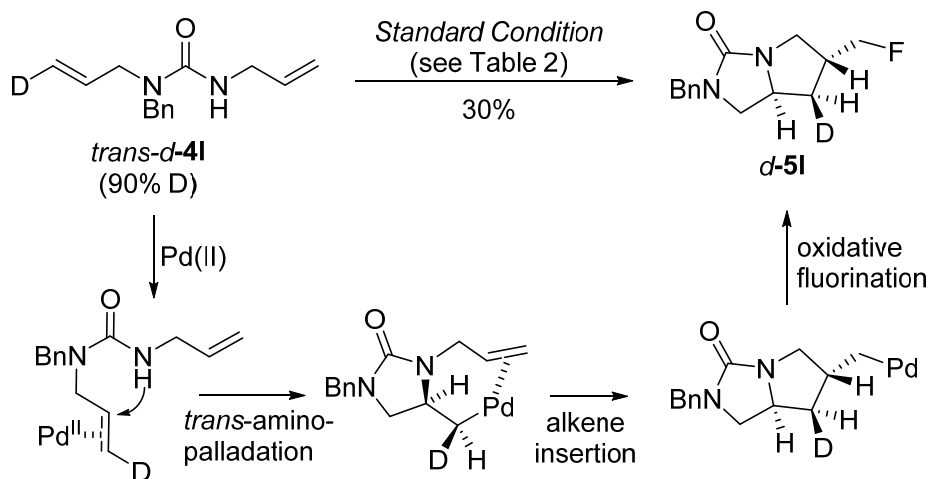

**Scheme S1.** The *exo*-aminofluorination of substrates *trans*-*d*-**4I** and the proposed mechanism for *exo*-aminofluorination of alkenes.

### 3.2 Controlling Experiment on the Aminofluorination with ArIF<sub>2</sub>.

In order to test the reactivity of ArIF<sub>2</sub> in the aminofluorination of alkenes, ArIF<sub>2</sub> (Ar = 2,5-dimethylphenyl) was synthesized according to the literature procedure.<sup>[S4]</sup> Then, substrate **1a** was treated by using ArIF<sub>2</sub> in the presence of palladium catalyst with following procedure: In a oven-dried glass Schlenk tube, Pd(OAc)<sub>2</sub> (1.2 mg, 0.005 mmol), ArIF<sub>2</sub> (54 mg, 0.2 mmol), AgOPiv (41.6 mg, 0.2 mmol), additives (2 equiv), and alkenes **1a** (0.1 mmol) were dissolved in dry toluene (1.0 mL). The reaction mixture was stirred at room temperature for 24 h, then the mixture was filtered and the solid was washed by CH<sub>2</sub>Cl<sub>2</sub>. Filtrates were combined and concentrated under vacuum. The residue was analyzed by <sup>1</sup>H NMR and <sup>19</sup>F NMR with 2,2,2-trifluoro-*N,N*-dimethylacetamide as internal standard. The results were summarized in Table S6.

**Table S6.** Pd-Catalyzed Aminofluorination with ArIF<sub>2</sub>.<sup>[a]</sup>

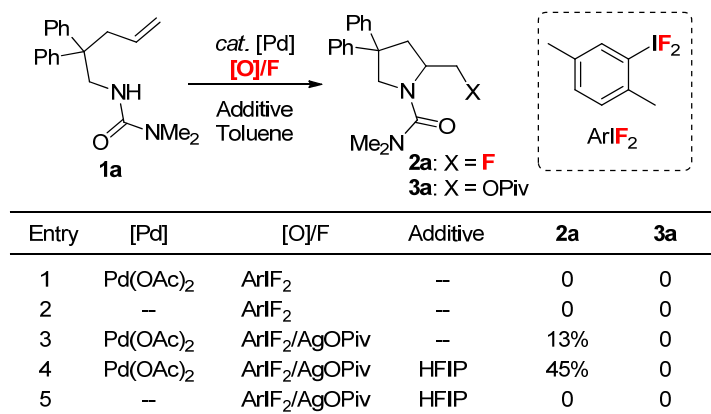

<sup>a</sup> Reaction condition: **1a** (0.2 mmol), Pd(OAc)<sub>2</sub> (5 mol %), ArIF<sub>2</sub> (2 equiv), AgOPiv (2 equiv), Additive (2 equiv) in toluene (1 mL) at r.t. <sup>b</sup> NMR yield.

### 3.3 Experiment of ArIF<sub>2</sub> (Ar = 2,5-dimethylphenyl) with AgOPiv.

In a oven-dried glass NMR tube, ArI(OPiv)<sub>2</sub> (20.3 mg, 0.05 mmol), AgF (41.6 mg, 0.05 mmol), with or without (CF<sub>3</sub>)<sub>2</sub>CHOH (5uL, 0.05 mmol) were added, then dry toluene (0.6 mL) was added, CF<sub>3</sub>-DMA was added as internal standard.

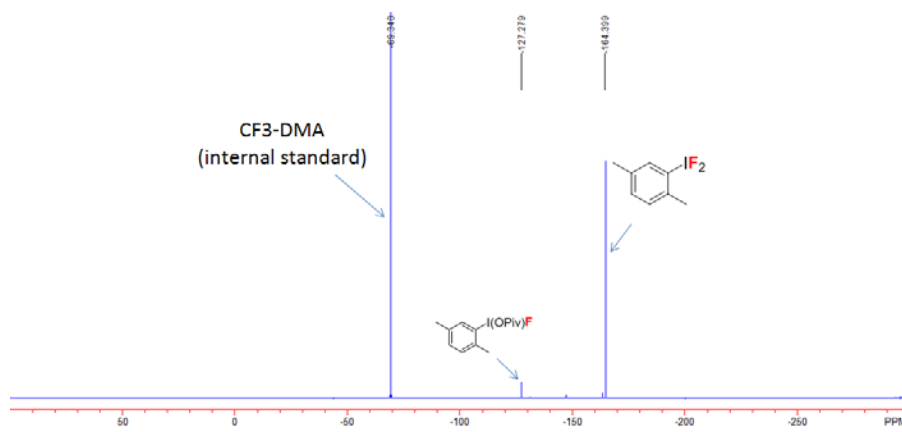

**Figure S4.** The FNMR of ArIF<sub>2</sub>+AgOPiv.

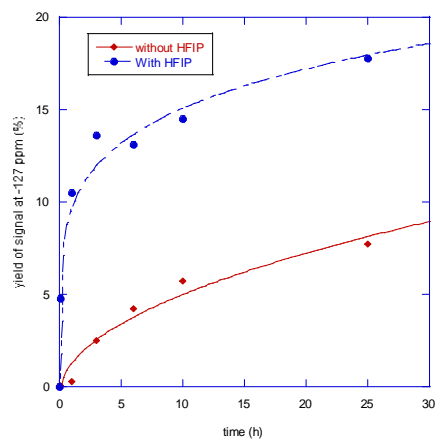

**Figure S5.** The effect of HFIP on the Transformation from ArIF<sub>2</sub> to ArI(OPiv)F.

## 4 Procedure of Substrate Synthesis

### 4.1 Typical procedures for the synthesis of substrate 1a:

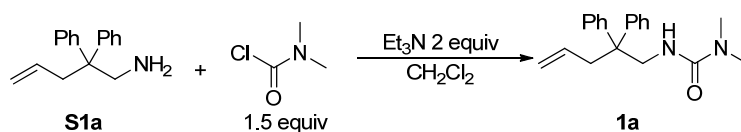

Substrate **S1a** was synthesized according to the previous literature.<sup>[S1d]</sup> The mixture of **S1a** (4.8 g, 20 mmol) and  $\text{Et}_3\text{N}$  (4.1 ml, 36 mmol, 1.8 equiv) in dry  $\text{CH}_2\text{Cl}_2$  (50 mL) were placed in a three-necked 100 ml flask. The solution of *N,N*-dimethylcarbamoyl chloride (2.8 ml, 36 mmol, 1.8 equiv) in  $\text{CH}_2\text{Cl}_2$  (10 mL) was added dropwisely at 0 °C. The resulting mixture was allowed to warm to room temperature and stirred over night. After reaction completed, water (20 mL) was added, and the mixture was extracted by  $\text{CH}_2\text{Cl}_2$ . The organic layer was combined and dried over  $\text{MgSO}_4$ . After removal solvent, the residue was purified through silical gel column chromatography (PE/EA = 3:1) to afford the desired product **1a** (5.54g, 90%).  $^1\text{H}$  NMR (400 MHz,  $\text{CDCl}_3$ )  $\delta$  7.35-7.27 (m, 4H), 7.25-7.16 (m, 6H), 5.47 (m, 1H), 5.08-4.82 (m, 2H), 4.00-3.81 (m, 3H), 2.87 (d,  $J = 7.1$  Hz, 2H), 2.71 (s, 6H);  $^{13}\text{C}$  NMR (100 MHz,  $\text{CDCl}_3$ )  $\delta$  158.1, 145.6, 133.9, 128.2, 128.1, 126.4, 118.6, 50.5, 47.6, 42.1, 35.9; HRMS:  $m/z$  (ESI) calculated  $[\text{M}+\text{Na}]^+$ : 331.1781, measured: 331.1794.

Substrates **1b-1i** were synthesized with the same procedure with **1a**,

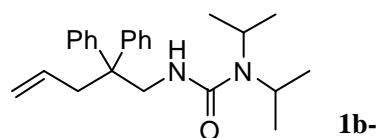

**1b**, yield: 75%;  $^1\text{H}$  NMR (400 MHz,  $\text{CDCl}_3$ )  $\delta$  7.38-7.24 (m, 4H), 7.25-7.17 (m, 6H), 5.47 (m, 1H), 5.12-4.83 (m, 2H), 3.97 (d,  $J = 5.4$  Hz, 2H), 3.89-3.60 (m, 3H), 2.90 (d,  $J = 7.2$  Hz, 2H), 0.99 (d,  $J = 6.9$  Hz, 12H);  $^{13}\text{C}$  NMR (100 MHz,  $\text{CDCl}_3$ )  $\delta$  157.2, 145.7, 133.8, 128.2, 128.0, 126.3, 118.3, 50.0, 47.6, 44.4, 42.3, 21.1; HRMS:  $m/z$  (ESI) calculated  $[\text{M}+\text{Na}]^+$ : 387.2407, measured: 387.2422.

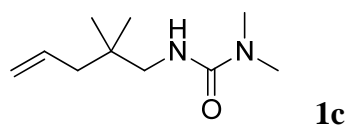

**1c**, yield: 80%;  $^1\text{H}$  NMR (400 MHz,  $\text{CDCl}_3$ )  $\delta$  6.03-5.74 (m, 1H), 5.14-4.96 (m, 2H), 4.52 (br, 1H), 3.09 (d,  $J = 6.2$  Hz, 2H), 2.91 (s, 6H), 1.98 (d,  $J = 8.8$  Hz, 2H), 0.89 (s, 6H);  $^{13}\text{C}$  NMR (100 MHz,  $\text{CDCl}_3$ )  $\delta$  158.5, 135.3, 117.0, 50.3, 44.6, 36.1, 34.6, 24.8. HRMS:  $m/z$  (ESI) calculated  $[\text{M}+\text{H}]^+$ : 185.1648, measured: 185.1648.

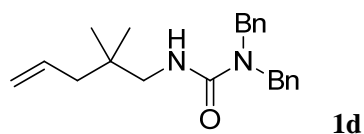

**1d**, yield: 64%;  $^1\text{H}$  NMR (400 MHz,  $\text{CDCl}_3$ )  $\delta$  7.37-7.26 (m, 10H), 5.71-5.65 (m, 1H), 4.93-4.90 (m, 2H), 4.35 (s, 4H), 4.38 (t,  $J = 5.6$  Hz, 1H), 3.05 (d,  $J = 6.4$  Hz, 2H), 1.72 (d,  $J = 7.6$  Hz, 2H), 0.70 (s, 6H).  $^{13}\text{C}$  NMR (100 MHz,  $\text{CDCl}_3$ )  $\delta$  158.5, 137.9, 135.0, 128.8, 127.5, 127.2, 117.1, 50.8, 50.3, 44.3, 34.6, 24.8. HRMS:  $m/z$  (ESI) calculated  $[\text{M}+\text{H}]^+$ : 337.2274, measured: 337.2273.

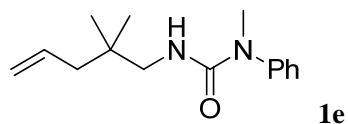

**1e**, yield: 65%;  $^1\text{H}$  NMR (400 MHz,  $\text{CDCl}_3$ )  $\delta$  7.47-7.26 (m, 5H), 5.77-5.67 (m, 1H), 4.88-4.76 (m, 2H), 4.37 (br, 1H), 3.27 (s, 3H), 3.01 (d,  $J = 6.4$  Hz, 2H), 1.82 (d,  $J = 7.6$  Hz, 2H), 0.79 (s, 6H);  $^{13}\text{C}$  NMR (100 MHz,  $\text{CDCl}_3$ )  $\delta$  157.3, 143.5, 135.0, 130.0, 127.5, 127.3, 117.0, 50.0, 44.6, 37.0, 34.9, 24.9; HRMS:  $m/z$  (ESI) calculated  $[\text{M}+\text{H}]^+$ : 247.1805, measured: 247.1807.

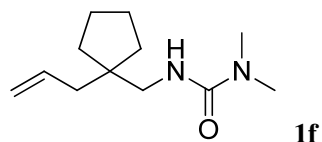

**1f**, yield: 67%;  $^1\text{H}$  NMR (400 MHz,  $\text{CDCl}_3$ )  $\delta$  5.99-5.78 (m, 1H), 5.07 (m, 2H), 4.52 (br, 1H), 3.16 (m, 2H), 2.9 (s, 6H), 2.18-2.01 (m, 2H), 1.76-1.51 (m, 4H), 1.52-1.27 (m, 4H).  $^{13}\text{C}$  NMR (100 MHz,  $\text{CDCl}_3$ )  $\delta$  158.6, 136.4, 116.8, 47.7, 46.3, 43.2, 36.1, 35.1, 24.8. HRMS:  $m/z$  (ESI) calculated  $[\text{M}+\text{Na}]^+$ : 233.1624 measured: 233.1619.

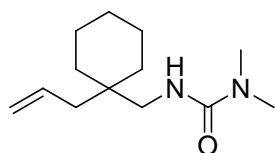

**1g**: yield: 78%;  $^1\text{H}$  NMR (400 MHz,  $\text{CDCl}_3$ )  $\delta$  6.08-5.76 (m, 1H), 5.21-4.95 (m, 2H), 4.47 (br, 1H), 3.17 (d,  $J = 6.4$  Hz, 2H), 2.89 (s, 6H), 2.15-1.98 (m, 2H), 1.72-1.15 (m, 10H).  $^{13}\text{C}$  NMR (100 MHz,  $\text{CDCl}_3$ )  $\delta$  158.5, 135.6, 116.8, 47.2, 41.5, 37.0, 36.2, 33.6, 26.2, 21.4. HRMS:  $m/z$  (ESI) calculated  $[\text{M}+\text{Na}]^+$ : 247.1781, measured: 247.1781.

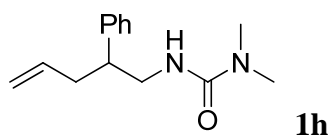

**1h**, yield: 64%;  $^1\text{H}$  NMR (400 MHz,  $\text{CDCl}_3$ )  $\delta$  7.43-7.04 (m, 5H), 5.70 (ddt,  $J = 17.1$ , 10.2, 7.1 Hz, 1H), 5.12-4.88 (m, 2H), 4.20 (br, 1H), 3.73 (ddd,  $J = 13.0$ , 6.4, 4.2 Hz, 1H), 3.26-3.08 (m, 1H), 2.90 (m, 1H), 2.76 (s, 6H), 2.51-2.30 (m, 2H);  $^{13}\text{C}$  NMR (100 MHz,  $\text{CDCl}_3$ )  $\delta$  158.2, 142.6, 136.2, 128.6, 127.8, 126.6, 116.4, 46.1, 45.8, 38.0, 36.0; HRMS:  $m/z$  (ESI) calculated  $[\text{M}+\text{Na}]^+$ : 255.1468, measured: 255.1469.

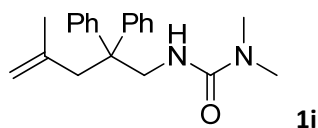

**1i**, yield: 72%;  $^1\text{H}$  NMR (400 MHz,  $\text{CDCl}_3$ )  $\delta$  7.34-7.25 (m, 4H), 7.26-7.18 (m, 6H), 4.84 (s, 1H), 4.64 (s, 1H), 4.03-3.91 (d,  $J = 9.2$  Hz, 2H), 3.85 (br, 1H), 2.87 (s, 2H), 2.69 (s, 6H), 1.05 (s, 3H).  $^{13}\text{C}$  NMR (100 MHz,  $\text{CDCl}_3$ )  $\delta$  158.1, 146.0, 141.6, 128.2, 128.1, 126.4, 116.2, 50.1, 47.0, 44.9, 35.8, 24.3. HRMS:  $m/z$  (ESI) calculated  $[\text{M}^+]$ : 322.2045, measured: 322.2040.

#### 4.2. Typical procedures for the synthesis of substrate 4a:

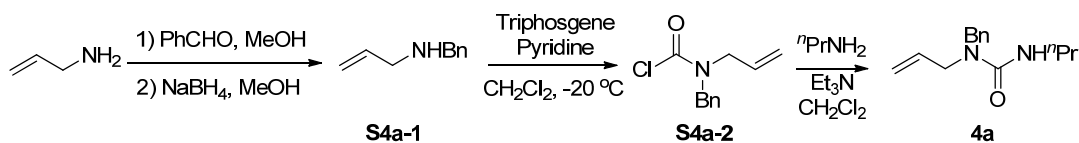

In a 100 ml round bottom flask, to a solution of allyl amine (1.7 g, 30 mmol) in

MeOH (40 ml), freshly distilled benzaldehyde (4.3 g, 40 mmol) was added. After the solution was stirred for 3 hours, NaBH<sub>4</sub> (1.52g, 40 mmol) was added in several portions. The mixture was stirred for another two hours, then brine was added to quench the reaction. After removal of solvent, the residue was extracted by diethyl ether (100 mL for twice). The organic layer was dried over MgSO<sub>4</sub>. After removal solvent, the residue was purified by column chromatography (PE/EA = 10:1) to afford product **S4a-1** (3.67g, 83%).

Pyridine (2 mL, 20 mmol) was added dropwisely to a solution of triphosgene (3 g, 10 mmol) in dry CH<sub>2</sub>Cl<sub>2</sub> (20 mL) at -20 °C. Then, a solution of the secondary amine **S4a-1** (1.1 g, 7.8 mmol) in CH<sub>2</sub>Cl<sub>2</sub> (10 mL) was added to the resulting suspension solution at the same temperature. The reaction was allowed to warm to room temperature and stirred for overnight. The reaction was quenched with saturated aqueous NH<sub>4</sub>Cl, and the mixture was extracted with CH<sub>2</sub>Cl<sub>2</sub>. The organic layer was washed with 0.1M HCl, water and brine, and dried over MgSO<sub>4</sub>. The solvent was removed under reduced pressure to give the crude carbamoyl chloride which was used directly in the next step.

The solution of allyl(benzyl) carbamic chloride (20 mmol) in CH<sub>2</sub>Cl<sub>2</sub> was added dropwisely to the solution of propylamine (1.2 g, 20 mmol) and Et<sub>3</sub>N (4.1 ml, 36 mmol, 1.8 equiv) in CH<sub>2</sub>Cl<sub>2</sub> (30 mL) at 0 °C. The resulting mixture was allowed to warm to room temperature and stirred over night. After the reaction was completed, water was added to quench the reaction and the mixture was abstracted by CH<sub>2</sub>Cl<sub>2</sub>. The organic layer was dried over MgSO<sub>4</sub>. After removal solvent, the residue was purified by silical gel column chromatography (PE/EA = 6:1) to afford the desired product **4a** (2.94g, 80% yield). **4a**: <sup>1</sup>H NMR (400 MHz, CDCl<sub>3</sub>) δ 7.37-7.29 (m, 2H), 7.29-7.22 (m, 3H), 5.92-5.65 (m, 1H), 5.25-5.09 (m, 2H), 4.48 (s, 3H), 3.85 (d, *J* = 5.4 Hz, 2H), 3.27-3.09 (q, *J* = 7.4 Hz, 2H), 1.53-1.40 (m, 2H), 0.84 (t, *J* = 7.4 Hz, 3H). <sup>13</sup>C NMR (100 MHz, CDCl<sub>3</sub>) δ 158.3, 138.0, 133.9, 128.6, 127.2, 116.7, 50.1, 49.5, 42.5, 23.3, 11.2. HRMS: *m/z* (ESI) calculated [M+Na]<sup>+</sup>: 255.1468, measured: 255.1469.



Substrates **4b-4e** was synthesized with the same procedure with **4a**,

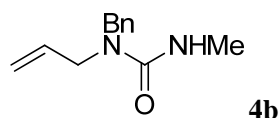

**4b**: yield: 68%;  $^1\text{H}$  NMR (400 MHz,  $\text{CDCl}_3$ )  $\delta$  7.38-7.28 (m, 2H), 7.26 (m, 3H), 5.89-5.68 (m, 1H), 5.29-5.03 (m, 2H), 4.52 (br, 1H), 4.48 (s, 2H), 3.91-3.77 (m, 2H), 2.84-2.74 (s, 3H).  $^{13}\text{C}$  NMR (100 MHz,  $\text{CDCl}_3$ )  $\delta$  156.0, 137.9, 133.7, 128.5, 127.2, 127.2, 116.7, 49.9, 49.3, 27.6. HRMS:  $m/z$  (ESI) calculated  $[\text{M}+\text{H}]^+$ : 205.1335, measured: 205.1336.

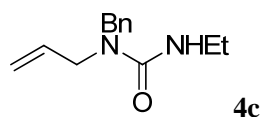

**4c**: yield: 73%;  $^1\text{H}$  NMR (400 MHz,  $\text{CDCl}_3$ )  $\delta$  7.34 (m, 2H), 7.29-7.21 (m, 3H), 5.87-5.68 (m, 1H), 5.27-5.09 (m, 2H), 4.48 (s, 2H), 4.40 (s, 1H), 3.84 (d,  $J = 5.3$  Hz, 2H), 3.34-3.17 (m, 2H), 1.08 (t,  $J = 7.2$  Hz, 3H);  $^{13}\text{C}$  NMR (100 MHz,  $\text{CDCl}_3$ )  $\delta$  158.3, 138.0, 133.9, 128.6, 127.3, 127.2, 116.7, 50.0, 49.4, 35.7, 15.5; HRMS:  $m/z$  (ESI) calculated  $[\text{M}+\text{Na}]^+$ : 241.1311, measured: 241.1311.

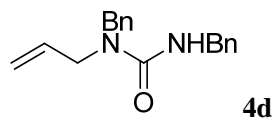

**4d**: yield: 82%;  $^1\text{H}$  NMR (400 MHz,  $\text{CDCl}_3$ )  $\delta$  7.42-7.13 (m, 10H), 5.78 (m, 1H), 5.24-5.09 (m, 2H), 4.76 (br, 1H), 4.51 (s, 2H), 4.43 (d,  $J = 5.4$  Hz, 2H), 3.88 (d,  $J = 5.1$  Hz, 2H);  $^{13}\text{C}$  NMR (100 MHz,  $\text{CDCl}_3$ )  $\delta$  158.2, 139.4, 137.9, 133.7, 128.7, 128.5, 127.4, 127.3, 127.1, 116.9, 50.2, 49.5, 44.9; HRMS:  $m/z$  (ESI) calculated  $[\text{M}+\text{Na}]^+$ : 303.1468, measured: 303.1469.

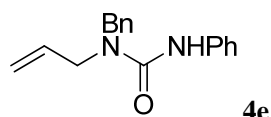

**4e**: yield: 69%;  $^1\text{H}$  NMR (400 MHz,  $\text{CDCl}_3$ )  $\delta$  7.50-7.16 (m, 9H), 7.07-6.94 (m, 1H), 6.46 (d,  $J = 4.8$  Hz, 1H), 5.86 (m, 1H), 5.40-5.16 (m, 2H), 4.59 (s, 2H), 4.08-3.91 (m, 2H);  $^{13}\text{C}$  NMR (100 MHz,  $\text{CDCl}_3$ )  $\delta$  155.7, 139.0, 137.6, 133.8, 128.8, 128.8, 127.6,

127.5, 122.9, 119.6, 119.6, 117.4, 50.6, 50.0; HRMS:  $m/z$  (ESI) calculated  $[M+Na]^+$ : 289.1311, measured: 289.1317.

#### 4.3 Typical procedures for the synthesis of substrate 4f:

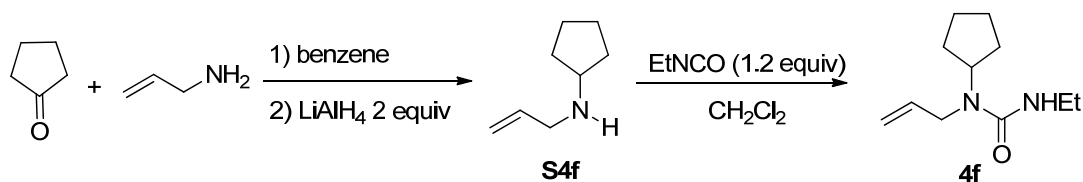

Substrate **S4f** was synthesized according to the previous literature.<sup>[S5]</sup> To a solution of **S4f** (0.58 g, 5 mmol) in 20ml CH<sub>2</sub>Cl<sub>2</sub>, EtNCO (0.48 ml, 6 mmol) was added dropwisely at 0 °C. The resulting mixture was allowed to warm to room temperature and stirred for overnight. After that, water was added to quench the reaction, and the mixture was extracted by CH<sub>2</sub>Cl<sub>2</sub>. The organic layer was dried over MgSO<sub>4</sub>. After removal solvent, the residue was purified by silical gel column chromatography (PE/EA = 6:1) to afford the desired product **4f** (0.78 g, 80% yield). **4f**: <sup>1</sup>H NMR (400 MHz, CDCl<sub>3</sub>) δ 5.97-5.68 (m, 1H), 5.36-5.07 (m, 2H), 4.79-4.59 (m, 1H), 4.35 (s, 1H), 3.75-3.58 (m, 2H), 3.31-3.07 (q,  $J = 7.2$  Hz, 2H), 1.93-1.72 (m, 2H), 1.72-1.45 (m, 4H), 1.46-1.28 (m, 2H), 1.17-1.00 (t,  $J = 7.2$  Hz, 3H); <sup>13</sup>C NMR (100 MHz, CDCl<sub>3</sub>) δ 158.5, 135.8, 116.0, 55.8, 44.9, 35.5, 29.2, 23.7, 15.5; HRMS:  $m/z$  (ESI) calculated  $[M+Na]^+$ : 219.1468, measured: 219.1470.

Substrates **4g-4i**, **4k** were synthesized with the above procedure.

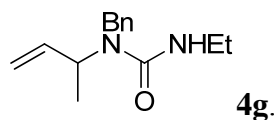

**4g**: yield: 72%; <sup>1</sup>H NMR (400 MHz, CDCl<sub>3</sub>) δ 7.33 (q,  $J = 7.4$  Hz, 2H), 7.31-7.21 (m, 3H), 5.91 (m, 1H), 5.26-5.10 (m, 2H), 5.01 (br, 1H), 4.39 (m, 1H), 4.31-4.13 (m, 2H), 3.30-3.03 (q,  $J = 7.2$  Hz, 2H), 1.25 (d,  $J = 6.9$  Hz, 3H), 0.97 (t,  $J = 7.2$  Hz, 3H); <sup>13</sup>C NMR (100 MHz, CDCl<sub>3</sub>) δ 158.4, 139.4, 138.6, 128.7, 127.2, 126.4, 115.6, 51.9, 46.7, 35.6, 16.5, 15.4; HRMS:  $m/z$  (ESI) calculated  $[M+Na]^+$ : 255.1468, measured: 255.1470.

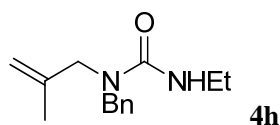

**4h**, yield: 78%;  $^1\text{H}$  NMR (400 MHz,  $\text{CDCl}_3$ )  $\delta$  7.39-7.29 (m, 2H), 7.29-7.20 (m, 3H), 4.91 (m, 1H), 4.87 (s, 1H), 4.49 (s, 3H), 3.73 (s, 2H), 3.34-3.14 (m, 2H), 1.69 (s, 3H), 1.08 (t,  $J = 7.2$  Hz, 3H);  $^{13}\text{C}$  NMR (100 MHz,  $\text{CDCl}_3$ )  $\delta$  158.5, 141.3, 138.0, 128.5, 127.3, 127.1, 111.6, 52.4, 50.1, 35.6, 19.8, 15.4; HRMS:  $m/z$  (ESI) calculated  $[\text{M}+\text{Na}]^+$ : 255.1468, measured: 255.1471.

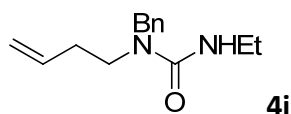

**4i**, yield: 71%;  $^1\text{H}$  NMR (400 MHz,  $\text{CDCl}_3$ )  $\delta$  7.48-7.31 (m, 2H), 7.31-7.16 (m, 3H), 5.91-5.64 (m, 1H), 5.07 (m, 2H), 4.47 (s, 2H), 4.32 (br, 1H), 3.34 (dd,  $J = 13.0, 5.6$  Hz, 2H), 3.24 (q,  $J = 7.2$  Hz, 2H), 2.42-2.23 (m, 2H), 1.06 (t,  $J = 7.2$  Hz, 3H);  $^{13}\text{C}$  NMR (100 MHz,  $\text{CDCl}_3$ )  $\delta$  158.0, 137.9, 135.3, 128.7, 127.3, 126.8, 116.8, 50.5, 47.0, 35.6, 32.8, 15.5; HRMS:  $m/z$  (ESI) calculated  $[\text{M}+\text{Na}]^+$ : 255.1468, measured: 255.1473.

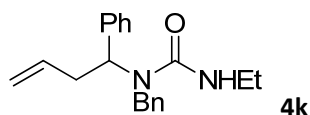

**4k**, yield: 75%;  $^1\text{H}$  NMR (400 MHz,  $\text{CDCl}_3$ )  $\delta$  7.58-6.94 (m, 10H), 6.04-5.67 (m, 2H), 5.26-4.89 (m, 2H), 4.43-3.87 (m, 3H), 3.40-3.03 (m, 2H), 2.90-2.60 (m, 2H), 0.89 (t,  $J = 7.2$  Hz, 3H);  $^{13}\text{C}$  NMR (100 MHz,  $\text{CDCl}_3$ )  $\delta$  158.6, 140.1, 137.8, 135.2, 128.6, 128.3, 128.1, 127.4, 127.2, 126.4, 117.2, 56.9, 46.7, 35.6, 35.4, 15.1; HRMS:  $m/z$  (ESI) calculated  $[\text{M}+\text{Na}]^+$ : 331.1781, measured: 331.1779.

#### 4.4 Typical procedures for the synthesis of substrate 4j:

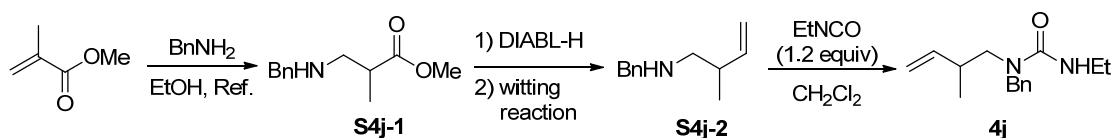

To a solution of benzylamine (2.2 g, 20 mmol) in anhydrous EtOH (20 mL), methyl methacrylate (2.4 g, 24 mmol) was added. The mixture was refluxed for 24 hours. After the evaporation of the solvent, the crude product **S4j-1** was obtained.

To a suspended solution of  $\text{Ph}_3\text{PCH}_3\text{Br}$  (15 mmol) in dry THF (30 mL),  $n\text{-BuLi}$  (16.5 mmol) was added dropwisely at  $0^\circ\text{C}$  over 10 min, and the mixture was stirred at  $0^\circ\text{C}$  for another 30 min. Then this Wittig reagent was prepared.

To a solution of crude product **S4j-1** (2.1 g, 10 mmol) in dry THF (50 mL), DIBAL-H (10 mL, 1.0 M in hexane solution) was added dropwisely for 10 min at  $-78^\circ\text{C}$ . The solution was stirred for another 30 min at the same temperature. Then the freshly prepared Wittig reagent was added at  $-78^\circ\text{C}$  for more than 30 min. The mixture was allowed to warm to room temperature and stirred for 1 hour. After reaction finished, saturated  $\text{NH}_4\text{Cl}$  aqueous solution was added to quench the reaction. The mixture was extracted by diethyl ether. The organic layer was dried over  $\text{MgSO}_4$ . After removal solvent, the residue was purified by silical gel column chromatography (PE/EA = 10:1) to afford product **S4j-2** (1.1 g, 62%). The substrate **4j** was synthesized according to the procedure of **4i**.

**4j**: yield: 66%;  $^1\text{H}$  NMR (400 MHz,  $\text{CDCl}_3$ )  $\delta$  7.37-7.22 (m, 5H), 5.58-5.73 (m, 1H), 5.04 (dd,  $J = 17.7, 14.2$  Hz, 2H), 4.48 (s, 2H), 4.25 (br, 1H), 3.26-3.16 (m, 4H), 2.56 (m, 1H), 1.04 (t,  $J = 7.1$  Hz, 3H), 1.01 (d,  $J = 7.3$  Hz, 3H);  $^{13}\text{C}$  NMR (100 MHz,  $\text{CDCl}_3$ )  $\delta$  158.3, 141.6, 137.8, 128.7, 127.3, 126.8, 114.7, 53.4, 51.0, 37.5, 35.7, 17.5, 15.5; HRMS:  $m/z$  (ESI) calculated  $[\text{M}+\text{Na}]^+$ : 269.1624, measured: 269.1627.

#### 4.5 Typical procedures for the synthesis of substrate **4l** and *trans-d-4l*:

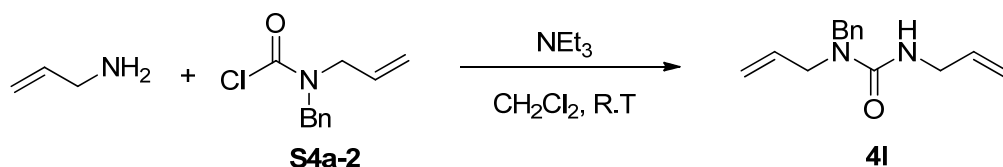

Substrate **4l** can be synthesized with the same procedure of **4a**.

**4l**, yield: 63%;  $^1\text{H}$  NMR (400 MHz,  $\text{CDCl}_3$ )  $\delta$  7.39-7.29 (m, 2H), 7.29-7.25 (m, 3H),

5.92-5.70 (m, 2H), 5.26-5.14 (m, 2H), 5.14-5.00 (m, 2H), 4.50 (s, 3H), 3.94-3.78 (m, 4H);  $^{13}\text{C}$  NMR (100 MHz,  $\text{CDCl}_3$ )  $\delta$  158.0, 137.8, 135.5, 133.7, 128.5, 127.2, 127.2, 116.8, 115.1, 50.0, 49.4, 43.2; HRMS:  $m/z$  (ESI) calculated  $[\text{M}^+]$ : 230.1419, measured: 230.1415.

Procedures for the synthesis of substrate *trans-d-4l*:

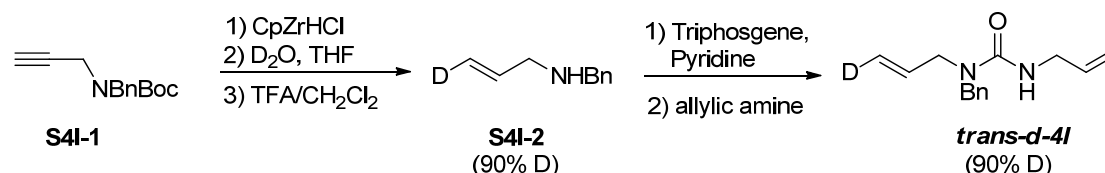

Under  $\text{N}_2$ , To a suspended solution of  $\text{CpZrHCl}$  (1.1 g, 3 mmol) in dry THF (20 mL), a solution of alkyne **S4l-1** (720 mg, 2.8 mmol) in THF (3.0 mL) was added at room temperature. The mixture was stirred for 1 h, and then quenched by addition of  $\text{D}_2\text{O}$  (0.5 mL). The mixture was stirred for 24 h, then was dried by anhydrous  $\text{Na}_2\text{SO}_4$ . After removal solvent, the residue was dissolved in  $\text{CH}_2\text{Cl}_2$  (10 mL), then TFA (1.2 mL, 15 mmol) was added and the mixture was stirred for 4 h. After removal solvent, the residue was treated by 10% NaOH solution, and the mixture was extracted by diethyl ether. The organic layer was dried by  $\text{Mg}_2\text{SO}_4$ . After removal solvent, the residue was purified through silica gel flash column chromatography (eluent: hexanes / ethyl acetate = 10/1) to give compound **S4l-2** (90% D, 325 mg, 78% yield).<sup>[S2a]</sup> Finally, substrate *trans-d-4l* (90% D) was synthesized with the same procedure of **4a** in 55% yield.

## 5 New product characterization

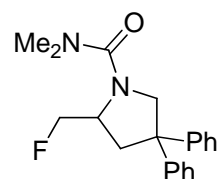

**2a:**  $^1\text{H}$  NMR (400 MHz,  $\text{CDCl}_3$ )  $\delta$  7.37-7.05 (m, 10H), 4.61 (ddd,  $J = 48.9, 9.6, 3.6$  Hz, 1H), 4.42 (ddd,  $J = 46.5, 9.6, 2.3$  Hz, 1H), 4.33-4.24 (m, 1H), 4.08-3.91 (m, 1H), 3.67 (d,  $J = 10.6$  Hz, 1H), 2.91 (s, 6H), 2.78 (t,  $J = 11.6$  Hz, 1H), 2.56 (m, 1H).  $^{13}\text{C}$  NMR (100 MHz,  $\text{CDCl}_3$ )  $\delta$  162.6, 145.3, 144.6, 128.5, 128.4, 126.7, 126.5, 126.4, 126.3, 82.6 (d,  $J = 170.0$  Hz), 60.1, 56.5 (d,  $J = 20.0$  Hz), 53.5, 38.3 (d,  $J = 10.4$  Hz), 38.2.  $^{19}\text{F}$  NMR (376 MHz,  $\text{CDCl}_3$ )  $\delta$  -232.8 (dt,  $J = 48.7, 25.2$  Hz). HRMS:  $m/z$  (ESI) calculated  $[\text{M}^+]$ : 326.1794, measured: 326.1806.

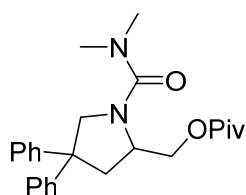

**3a:**  $^1\text{H}$  NMR (400 MHz,  $\text{CDCl}_3$ )  $\delta$  7.36-7.09 (m, 10H), 4.29 (m, 2H), 4.12 (m, 2H), 3.64 (d,  $J = 10.4$  Hz, 1H), 2.89 (s, 6H), 2.57 (d,  $J = 8.8$  Hz, 2H), 1.18 (s, 9H).  $^{13}\text{C}$  NMR (100 MHz,  $\text{CDCl}_3$ )  $\delta$  178.0, 162.5, 145.5, 144.7, 128.5, 128.1, 128.0, 126.6, 126.5, 126.4, 63.9, 60.2, 55.5, 53.5, 39.7, 38.7, 38.1, 27.2. HRMS:  $m/z$  (ESI) calculated  $[\text{M}^+]$ : 408.2413, measured: 408.2402.

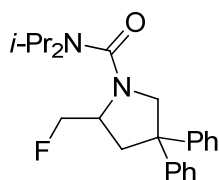

**2b:**  $^1\text{H}$  NMR (400 MHz,  $\text{CDCl}_3$ )  $\delta$  7.51-6.78 (m, 10H), 4.56 (ddd,  $J = 49.0, 9.6, 3.6$  Hz, 1H), 4.46-4.29 (ddd,  $J = 49.0, 9.6, 3.6$  Hz, 1H), 4.20 (t,  $J = 10.6$  Hz, 1H), 4.06 (m, 1H), 3.65 (m, 3H), 2.71 (t,  $J = 11.6$  Hz, 1H), 2.54 (m, 1H), 1.35 (d,  $J = 6.6$  Hz, 6H), 1.32 (d,  $J = 6.7$  Hz, 6H).  $^{13}\text{C}$  NMR (100 MHz,  $\text{CDCl}_3$ )  $\delta$  161.3, 145.7, 144.9, 128.5, 128.4, 126.9, 126.6, 126.5, 126.4, 83.2 (d,  $J = 170.0$  Hz), 60.6, 56.1 (d,  $J = 20.0$  Hz), 53.6, 47.3, 38.3 (d,  $J = 4.6$  Hz), 22.7, 21.1.  $^{19}\text{F}$  NMR (376 MHz,  $\text{CDCl}_3$ )  $\delta$  -232.3 (dt,  $J = 48.5, 25.6$  Hz). HRMS:  $m/z$  (ESI) calculated  $[\text{M}^+]$ : 382.2420, measured: 382.2418.

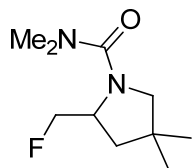

**2c:**  $^1\text{H}$  NMR (400 MHz,  $\text{CDCl}_3$ )  $\delta$  4.55 (ddd,  $J = 47.6, 9.4, 3.8$  Hz, 1H), 4.51-4.32 (m, 1H), 4.30 (ddd,  $J = 47.6, 9.2, 2.6$  Hz, 1H), 3.16 (d,  $J = 9.6$  Hz, 1H), 3.00 (d,  $J = 9.6$  Hz, 1H), 2.82 (s, 6H), 1.72 (m, 1H), 1.58-1.48 (m, 1H), 1.19 (s, 3H), 1.11 (s, 3H).  $^{13}\text{C}$  NMR (100 MHz,  $\text{CDCl}_3$ )  $\delta$  163.4, 83.0 (d,  $J = 170.0$  Hz), 63.8, 57.0 (d,  $J = 20.0$  Hz), 39.9 (d,  $J = 4.0$  Hz), 38.4, 38.0, 25.8, 25.6.  $^{19}\text{F}$  NMR (376 MHz,  $\text{CDCl}_3$ )  $\delta$  -232.2 (dt,  $J = 48.1, 25.2$  Hz). HRMS:  $m/z$  (ESI) calculated  $[\text{M}^+]$ : 202.1481, measured: 202.1484.

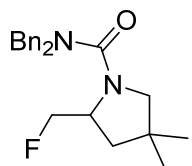

**2d:**  $^1\text{H}$  NMR (400 MHz,  $\text{CDCl}_3$ )  $\delta$  7.39-7.32 (m, 4H), 7.32-7.25 (m, 2H), 7.25-7.16 (m, 4H), 4.67 (d,  $J = 15.4$  Hz, 2H), 4.63-4.24 (m, 3H), 4.04 (d,  $J = 15.4$  Hz, 2H), 3.22 (s, 2H), 1.87-1.68 (m, 2H), 1.13 (s, 3H), 1.07 (s, 3H).  $^{13}\text{C}$  NMR (100 MHz,  $\text{CDCl}_3$ )  $\delta$  163.0, 137.6, 128.4, 127.7, 127.1, 83.4 (d,  $J = 170.8$  Hz), 63.6, 57.0 (d,  $J = 20.1$  Hz), 50.1, 39.7 (d,  $J = 4.0$  Hz), 38.6, 25.6, 25.4.  $^{19}\text{F}$  NMR (376 MHz,  $\text{CDCl}_3$ )  $\delta$  -231.3 (m). HRMS:  $m/z$  (ESI) calculated  $[\text{M}^+]$ : 354.2107, measured: 354.2104.

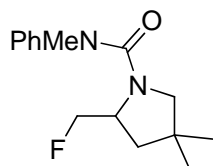

**2e:**  $^1\text{H}$  NMR (400 MHz,  $\text{CDCl}_3$ )  $\delta$  7.34-7.08 (m, 5H), 4.83 (ddd,  $J = 49.2, 9.2, 3.2$  Hz, 1H), 4.34 (ddd,  $J = 49.2, 9.6, 2.0$  Hz, 1H), 4.33 (m, 1H), 3.25 (s, 3H), 2.73 (d,  $J = 10.4$  Hz, 1H), 2.25 (d,  $J = 10.0$  Hz, 1H), 1.64 (d,  $J = 8.8$  Hz, 2H), 0.92 (s, 3H), 0.90 (s,

3H).  $^{13}\text{C}$  NMR (100 MHz,  $\text{CDCl}_3$ )  $\delta$  159.6, 145.7, 129.2, 124.6, 124.4, 82.5 (d,  $J = 170.1$  Hz), 62.3, 57.0 (d,  $J = 19.7$  Hz), 39.5 (d,  $J = 3.8$  Hz), 39.0, 37.7, 25.7, 25.3.  $^{19}\text{F}$  NMR (376 MHz,  $\text{CDCl}_3$ )  $\delta$  -233.3 (ddd,  $J = 49.4, 46.3, 27.2$  Hz). HRMS:  $m/z$  (ESI) calculated  $[\text{M}^+]$ : 264.1638, measured: 264.1631.

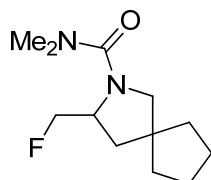

**2f:**  $^1\text{H}$  NMR (400 MHz,  $\text{CDCl}_3$ )  $\delta$  4.56-4.22 (m, 3H), 3.24 (d,  $J = 9.6$  Hz, 1H), 3.08 (d,  $J = 9.6$  Hz, 1H), 2.83 (s, 6H), 1.89-1.77 (m, 2H), 1.73-1.53 (m, 6H), 1.50-1.35 (m, 2H).  $^{13}\text{C}$  NMR (100 MHz,  $\text{CDCl}_3$ )  $\delta$  163.3, 83.5 (d,  $J = 169.0$  Hz), 62.3, 57.2 (d,  $J = 21.0$  Hz), 49.4, 38.7 (d,  $J = 4.1$  Hz), 38.0, 37.2, 35.1, 24.7.  $^{19}\text{F}$  NMR (376 MHz,  $\text{CDCl}_3$ )  $\delta$  -231.9 (td,  $J = 47.7, 24.4$  Hz). HRMS:  $m/z$  (ESI) calculated  $[\text{M}^+]$ : 228.1638, measured: 228.1640.

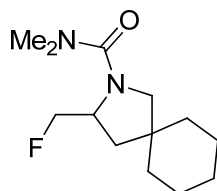

**2g:**  $^1\text{H}$  NMR (400 MHz,  $\text{CDCl}_3$ )  $\delta$  4.53-4.27 (m, 3H), 3.18 (d,  $J = 9.9$  Hz, 1H), 3.08 (d,  $J = 9.9$  Hz, 1H), 2.83 (s, 6H), 1.93 (dd,  $J = 12.4, 7.2$  Hz, 1H), 1.64-1.54 (m, 1H), 1.54-1.35 (m, 6H), 1.32-1.28 (m, 4H).  $^{13}\text{C}$  NMR (100 MHz,  $\text{CDCl}_3$ )  $\delta$  163.5, 83.7 (d,  $J = 170.0$  Hz), 56.1 (d,  $J = 20.0$  Hz), 42.2, 38.0, 36.1, 33.6, 27.2, 26.1, 23.8, 22.5.  $^{19}\text{F}$  NMR (376 MHz,  $\text{CDCl}_3$ )  $\delta$  -232.1 (td,  $J = 48.1, 24.3$  Hz). HRMS:  $m/z$  (ESI) calculated  $[\text{M}^+]$ : 242.1794, measured: 242.1800.

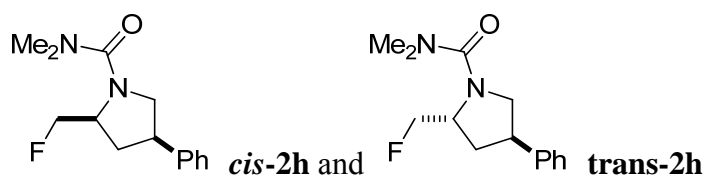



These two isomers can not be separated.

**cis-2h:**  $^1\text{H}$  NMR (400 MHz,  $\text{CDCl}_3$ )  $\delta$  7.37-7.21 (m, 5H), 4.62-4.39 (m, 3H), 3.67 (t,  $J = 8.4$  Hz, 1H), 3.371 (t,  $J = 9.2$  Hz, 1H), 3.26 (m, 1H), 2.85 (s, 6H), 2.35 (m, 1H), 2.13 (m, 1H).  $^{13}\text{C}$  NMR (100 MHz,  $\text{CDCl}_3$ )  $\delta$  162.8, 139.8, 128.5, 127.1, 126.6, 83.3 (d,  $J = 170.6$  Hz), 58.0, 57.9 (d,  $J = 20.0$  Hz), 44.1, 37.9, 33.4 (d,  $J = 4.4$  Hz).  $^{19}\text{F}$  NMR (376 MHz,  $\text{CDCl}_3$ )  $\delta$  -232.2 (td,  $J = 47.7, 24.4$  Hz). **trans-2h:**  $^1\text{H}$  NMR (400 MHz,  $\text{CDCl}_3$ )  $\delta$  7.35-7.12 (m, 5H), 4.54-4.36 (m, 3H), 3.89 (dd,  $J = 10.0, 6.8$  Hz, 1H), 3.51 (td,  $J = 12.0, 6.4$  Hz, 1H), 3.37 (dd,  $J = 7.6, 6.8$  Hz, 1H), 2.87 (s, 6H), 2.33 (m, 1H), 2.12 (m, 1H).  $^{13}\text{C}$  NMR (100 MHz,  $\text{CDCl}_3$ )  $\delta$  162.9, 142.9, 128.6, 127.0, 126.5, 84.0 (d,  $J = 170.6$  Hz), 56.8 (d,  $J = 20.5$  Hz), 56.7, 43.3, 38.2, 34.2 (d,  $J = 3.7$  Hz).  $^{19}\text{F}$  NMR (376 MHz,  $\text{CDCl}_3$ )  $\delta$  -230.8 (td,  $J = 47.0, 24.7$  Hz). HRMS:  $m/z$  (ESI) calculated  $[\text{M}^+]$ : 250.1481, measured: 250.1475.

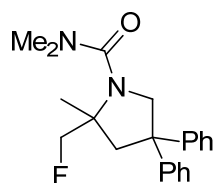

**2i:**  $^1\text{H}$  NMR (400 MHz,  $\text{CDCl}_3$ )  $\delta$  7.45-7.05 (m, 10H), 4.43 (dd,  $J = 48.0, 9.0$  Hz, 1H), 4.29 (d,  $J = 10.7$  Hz, 1H), 4.21 (dd,  $J = 48.0, 9.0$  Hz, 1H), 4.02 (d,  $J = 10.8$  Hz, 1H), 3.19 (d,  $J = 12.4$  Hz, 1H), 2.80 (s, 6H), 2.44 (d,  $J = 12.5$  Hz, 1H), 1.17 (d,  $J = 2.3$  Hz, 3H).  $^{13}\text{C}$  NMR (100 MHz,  $\text{CDCl}_3$ )  $\delta$  162.0, 145.7, 145.6, 128.6, 128.5, 126.7, 126.5, 126.4, 126.3, 85.4 (d,  $J = 172.0$  Hz), 63.8 (d,  $J = 18.0$  Hz), 58.9, 51.8, 46.3 (d,  $J = 4.0$  Hz), 38.9, 22.7.  $^{19}\text{F}$  NMR (376 MHz,  $\text{CDCl}_3$ )  $\delta$  -221.4 (t,  $J = 47.8$  Hz). HRMS:  $m/z$  (ESI) calculated  $[\text{M}^+]$ : 340.1951, measured: 340.1946.

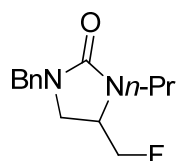

**5a:**  $^1\text{H}$  NMR (400 MHz,  $\text{CDCl}_3$ )  $\delta$  7.39-7.20 (m, 5H), 4.44 (d,  $J = 4.7$  Hz, 1H), 4.36 (d,  $J = 4.6$  Hz, 2H), 4.33 (d,  $J = 4.7$  Hz, 1H), 3.89-3.73 (m, 1H), 3.49-3.36 (m, 1H),

3.30 (m, 1H), 3.18-3.07 (m, 1H), 2.96 (dd,  $J = 9.0, 6.0$  Hz, 1H), 1.72-1.47 (m, 2H), 0.92 (t,  $J = 7.6$  Hz, 3H).  $^{13}\text{C}$  NMR (100 MHz,  $\text{CDCl}_3$ )  $\delta$  160.3, 136.9, 128.4, 127.9, 127.3, 82.8 (d,  $J = 174.0$  Hz), 52.4 (d,  $J = 21.0$  Hz), 47.9, 44.0, 43.9 (d,  $J = 8.0$  Hz), 20.9, 11.0.  $^{19}\text{F}$  NMR (376 MHz,  $\text{CDCl}_3$ )  $\delta$  -227.5 (td,  $J = 47.0, 16.9$  Hz). HRMS:  $m/z$  (ESI) calculated  $[\text{M}^+]$ : 250.1481, measured: 250.1479.

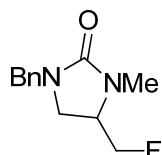

**5b:**  $^1\text{H}$  NMR (400 MHz,  $\text{CDCl}_3$ )  $\delta$  7.47-7.07 (m, 5H), 4.55-4.42 (m, 1H), 4.41-4.29 (m, 3H), 3.68 (m, 1H), 3.31 (m, 1H), 2.97-2.90 (m, 1H), 2.89 (s, 3H).  $^{13}\text{C}$  NMR (100 MHz,  $\text{CDCl}_3$ )  $\delta$  160.5, 136.8, 128.5, 127.9, 127.4, 82.7 (d,  $J = 173.0$  Hz), 54.9 (d,  $J = 21.0$  Hz), 48.0, 43.7 (d,  $J = 7.0$  Hz), 29.8.  $^{19}\text{F}$  NMR (376 MHz,  $\text{CDCl}_3$ )  $\delta$  -227.7 (td,  $J = 47.0, 17.4$  Hz). HRMS:  $m/z$  (ESI) calculated  $[\text{M}^+]$ : 222.1168, measured: 222.1163.

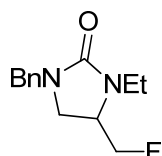

**5c:**  $^1\text{H}$  NMR (400 MHz,  $\text{CDCl}_3$ )  $\delta$  7.37-7.20 (m, 5H), 4.46 (d,  $J = 4.8$  Hz, 1H), 4.37 (s, 2H), 4.32 (d,  $J = 4.8$  Hz, 1H), 3.95-3.75 (m, 1H), 3.61-3.45 (m, 1H), 3.38-3.26 (m, 1H), 3.26-3.16 (m, 1H), 3.00-2.88 (m, 1H), 1.18-1.10 (t,  $J = 7.2$  Hz, 3H).  $^{13}\text{C}$  NMR (100 MHz,  $\text{CDCl}_3$ )  $\delta$  160.1, 136.7, 128.5, 127.9, 127.3, 83.0 (d,  $J = 173.0$  Hz), 52.0 (d,  $J = 21.0$  Hz), 48.0, 44.0 (d,  $J = 7.0$  Hz), 37.1, 12.9.  $^{19}\text{F}$  NMR (376 MHz,  $\text{CDCl}_3$ )  $\delta$  -227.3 (tdd,  $J = 46.9, 16.5, 3.4$  Hz). HRMS:  $m/z$  (ESI) calculated  $[\text{M}^+]$ : 236.1325, measured: 236.1317.

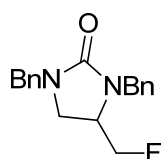

**5d:**  $^1\text{H}$  NMR (400 MHz,  $\text{CDCl}_3$ )  $\delta$  7.36-7.25 (m, 10H), 4.85 (d,  $J = 15.2$  Hz, 1H), 4.45-4.33 (m, 2H), 4.40-4.33 (m, 1H), 4.28-4.21 (m, 1H), 4.22 (d,  $J = 15.2$  Hz, 1H), 3.62 (m, 1H), 3.27 (t,  $J = 9.2$  Hz, 1H), 2.97 (dd,  $J = 9.2, 7.2$  Hz, 1H).  $^{13}\text{C}$  NMR (100 MHz,  $\text{CDCl}_3$ )  $\delta$  160.4, 137.1, 136.8, 128.6, 128.2, 128.2, 128.0, 127.5, 127.5, 82.7 (d,  $J = 173.0$  Hz), 51.8 (d,  $J = 21.0$  Hz), 48.1, 46.5, 43.8 (d,  $J = 7.0$  Hz).  $^{19}\text{F}$  NMR (376 MHz,  $\text{CDCl}_3$ )  $\delta$  -227.6 (td,  $J = 46.9, 17.2$  Hz). HRMS:  $m/z$  (ESI) calculated [ $\text{M}^+$ ]: 298.1481, measured: 298.1475.

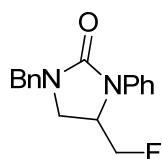

**5e:**  $^1\text{H}$  NMR (400 MHz,  $\text{CDCl}_3$ )  $\delta$  7.57-7.43 (m, 2H), 7.38-7.23 (m, 6H), 7.17-7.01 (m, 2H), 4.52-4.36 (m, 4H), 4.34 (d,  $J = 4.2$  Hz, 1H), 3.48 (m, 1H), 3.38-3.27 (m, 1H).  $^{13}\text{C}$  NMR (100 MHz,  $\text{CDCl}_3$ )  $\delta$  157.6, 138.2, 136.5, 129.0, 128.6, 128.1, 127.5, 124.1, 121.1, 81.0 (d,  $J = 174.0$  Hz), 52.7 (d,  $J = 23.0$  Hz), 47.84, 44.0 (d,  $J = 4.0$  Hz).  $^{19}\text{F}$  NMR (376 MHz,  $\text{CDCl}_3$ )  $\delta$  -232.3 (m). HRMS:  $m/z$  (ESI) calculated [ $\text{M}^+$ ]: 284.1325, measured: 284.1323.

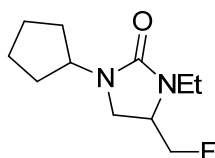

**5f:**  $^1\text{H}$  NMR (400 MHz,  $\text{CDCl}_3$ )  $\delta$  4.56-4.47 (m, 1H), 4.45-4.36 (m, 1H), 4.27-4.23 (m, 1H), 3.96-3.77 (m, 1H), 3.54-3.33 (m, 2H), 3.17 (m, 1H), 3.12-2.99 (m, 1H), 1.82-1.73 (m, 2H), 1.66-1.42 (m, 6H), 1.12 (t,  $J = 7.2$  Hz, 3H).  $^{13}\text{C}$  NMR (100 MHz,  $\text{CDCl}_3$ )  $\delta$  159.9, 83.0 (d,  $J = 174.0$  Hz), 53.49, 52.2 (d,  $J = 21$  Hz), 40.3 (d,  $J = 6.0$  Hz), 37.0, 28.4, 28.1, 23.9, 12.9.  $^{19}\text{F}$  NMR (376 MHz,  $\text{CDCl}_3$ )  $\delta$  -227.4 (td,  $J = 47.0, 15.9$  Hz). HRMS:  $m/z$  (ESI) calculated [ $\text{M}^+$ ]: 214.1481, measured: 214.1477.

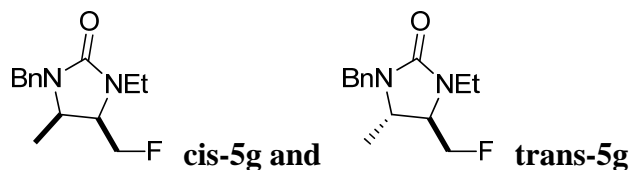

These two isomers cannot be separated.

**cis-5g:**  $^1\text{H}$  NMR (400 MHz,  $\text{CDCl}_3$ )  $\delta$  7.36-7.20 (m, 5H), 4.77 (d,  $J = 15.6$  Hz, 1H), 4.42 (d,  $J = 4.8$  Hz, 1H), 4.30 (d,  $J = 4.8$  Hz, 1H), 4.02 (d,  $J = 15.6$  Hz, 1H), 3.55 (m, 1H), 3.32 (m, 1H), 3.24-3.10 (m, 2H), 1.14 (t,  $J = 7.2$  Hz, 3H), 1.09 (d,  $J = 7.2$  Hz, 3H).  $^{13}\text{C}$  NMR (100 MHz,  $\text{CDCl}_3$ )  $\delta$  159.8, 136.9, 128.4, 128.0, 127.8, 82.4 (d,  $J = 173.1$  Hz), 60.0 (d,  $J = 20.2$  Hz), 45.1, 40.0, 26.9, 18.2, 12.6 (d,  $J = 10.5$  Hz).  $^{19}\text{F}$  NMR (376 MHz,  $\text{CDCl}_3$ )  $\delta$  -227.0 (td,  $J = 47.1, 17.3$  Hz). **trans-5g:**  $^1\text{H}$  NMR (400 MHz,  $\text{CDCl}_3$ )  $\delta$  7.34-7.22 (m, 5H), 4.75 (d,  $J = 15.2$  Hz, 1H), 4.17 (d,  $J = 4.4$  Hz, 1H), 4.12 (d,  $J = 15.6$  Hz, 1H), 3.97 (d,  $J = 4.8$  Hz, 1H), 3.64 (m, 1H), 3.37 (td,  $J = 7.2, 4.4$  Hz, 1H), 3.16-3.08 (m, 2H), 1.12 (t,  $J = 7.2$  Hz, 3H), 1.10 (d,  $J = 7.2$  Hz, 3H).  $^{13}\text{C}$  NMR (100 MHz,  $\text{CDCl}_3$ )  $\delta$  159.6, 136.8, 128.4, 127.9, 127.1, 80.4 (d,  $J = 171.6$  Hz), 55.3 (d,  $J = 20.4$  Hz), 44.9 (d,  $J = 4.9$  Hz), 36.7, 27.0, 18.0, 12.9.  $^{19}\text{F}$  NMR (376 MHz,  $\text{CDCl}_3$ )  $\delta$  -228.2 (td,  $J = 46.7, 19.0$  Hz). HRMS:  $m/z$  (ESI) calculated [ $\text{M}^+$ ]: 250.1481, measured: 250.1474.

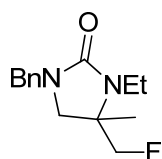

**5h:**  $^1\text{H}$  NMR (400 MHz,  $\text{CDCl}_3$ )  $\delta$  7.40-7.16 (m, 5H), 4.45-4.32 (m, 2H), 4.28 (dd,  $J = 22.9, 9.4$  Hz, 1H), 4.16 (dd,  $J = 21.8, 8.6$  Hz, 1H), 3.35-3.18 (m, 2H), 3.14 (dd,  $J = 8.8, 2.3$  Hz, 1H), 2.87 (dd,  $J = 8.9, 1.9$  Hz, 1H), 1.31-1.25 (m, 3H), 1.19 (t,  $J = 4.6$  Hz, 3H).  $^{13}\text{C}$  NMR (100 MHz,  $\text{CDCl}_3$ )  $\delta$  159.6, 137.1, 128.5, 127.9, 127.3, 85.4 (d,  $J = 178.0$  Hz), 57.6 (d,  $J = 18.0$  Hz), 51.6 (d,  $J = 4.0$  Hz), 47.8, 34.72, 20.3, 15.8.  $^{19}\text{F}$  NMR (376 MHz,  $\text{CDCl}_3$ )  $\delta$  -224.7 (t,  $J = 47.2$  Hz). HRMS:  $m/z$  (ESI) calculated [ $\text{M}^+$ ]: 250.1481, measured: 250.1475.

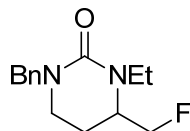

**5i:**  $^1\text{H}$  NMR (400 MHz,  $\text{CDCl}_3$ )  $\delta$  7.39-7.27 (m, 2H), 7.27-7.16 (m, 3H), 4.56 (s, 2H), 4.51-4.20 (m, 2H), 3.85-3.68 (m, 1H), 3.70-3.55 (m, 1H), 3.31-3.19 (m, 1H), 3.15 (dd,  $J = 13.9, 7.0$  Hz, 1H), 3.11-3.02 (m, 1H), 2.10-1.82 (m, 2H), 1.18 (d,  $J = 4.3$  Hz, 3H).  $^{13}\text{C}$  NMR (100 MHz,  $\text{CDCl}_3$ )  $\delta$  155.1, 138.1, 128.3, 127.6, 126.9, 81.9 (d,  $J = 175.0$  Hz), 53.4 (d,  $J = 22.0$  Hz), 51.1, 42.3, 41.2, 22.8 (d,  $J = 2.0$  Hz), 13.6.  $^{19}\text{F}$  NMR (376 MHz,  $\text{CDCl}_3$ )  $\delta$  -224.0 (td,  $J = 46.9, 12.3$  Hz). HRMS:  $m/z$  (ESI) calculated  $[\text{M}^+]$ : 250.1481, measured: 250.1480.

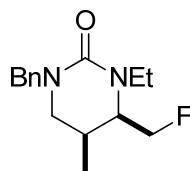

**5j:**  $^1\text{H}$  NMR (400 MHz,  $\text{CDCl}_3$ )  $\delta$  7.33-7.25 (m, 5H), 4.59 (d,  $J = 15.2$  Hz, 1H), 4.49 (d,  $J = 15.2$  Hz, 1H), 4.47-4.35 (m, 2H), 3.92-3.87 (m, 1H), 3.37 (dd,  $J = 12.4, 4.4$  Hz, 1H), 3.28 (m, 1H), 3.02-2.97 (m, 1H), 2.78 (d,  $J = 12.0$  Hz, 1H), 2.12 (m, 1H), 1.17 (t,  $J = 7.2$  Hz, 3H), 1.04 (d,  $J = 7.2$  Hz, 3H).  $^{13}\text{C}$  NMR (100 MHz,  $\text{CDCl}_3$ )  $\delta$  154.5, 138.1, 128.2, 127.8, 127.0, 82.6 (d,  $J = 174.8$  Hz), 59.4 (d,  $J = 22.0$  Hz), 51.1, 50.0, 42.0, 25.3, 17.3, 13.5 (d,  $J = 2.6$  Hz).  $^{19}\text{F}$  NMR (376 MHz,  $\text{CDCl}_3$ )  $\delta$  -224.01 (td,  $J = 47.0, 12.1$  Hz). HRMS:  $m/z$  (ESI) calculated  $[\text{M}^+]$ : 264.1638, measured: 264.1637.

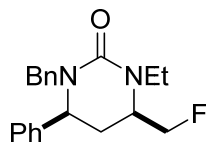

*cis*-**5k** and

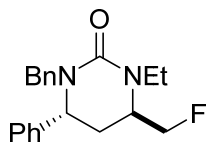

*trans*-**5k**

These two isomers can not be separated.

**cis-5k:**  $^1\text{H}$  NMR (400 MHz,  $\text{CDCl}_3$ )  $\delta$  7.39-7.08 (m, 10H), 5.45 (d,  $J = 15.6$  Hz, 1H), 4.41 (d,  $J = 5.2$  Hz, 1H), 4.30 (d,  $J = 5.2$  Hz, 1H), 4.29 (dd,  $J = 8.4, 5.2$  Hz, 1H), 3.91

(tt,  $J = 14.0$  Hz, 7.2 Hz, 1H), 3.56-3.46 (m, 1H), 3.48 (d,  $J = 15.2$  Hz, 1H), 3.23 (dt,  $J = 14.0$ , 7.2 Hz, 1H), 2.28-2.19 (m, 1H), 2.07-1.98 (m, 1H), 1.20 (t,  $J = 7.2$  Hz, 3H).  $^{13}\text{C}$  NMR (100 MHz,  $\text{CDCl}_3$ )  $\delta$  156.2, 140.7, 137.9, 128.7, 128.3, 128.0, 127.7, 127.0, 126.5, 82.8 (d,  $J = 175.0$  Hz), 55.4, 51.5 (d,  $J = 21$  Hz), 48.3, 41.3, 33.1 (d,  $J = 3.0$  Hz), 13.5.  $^{19}\text{F}$  NMR (376 MHz,  $\text{CDCl}_3$ )  $\delta$ -228.2 (td,  $J = 46.7$ , 19.0 Hz). **trans-5k**:  $^1\text{H}$  NMR (400 MHz,  $\text{CDCl}_3$ )  $\delta$  7.35-7.14 (m, 10H), 5.59 (d,  $J = 15.2$  Hz, 1H), 4.46 (t,  $J = 4.4$  Hz, 1H), 4.19-4.08 (m, 1H), 4.02-3.96 (m, 1H), 3.80-3.62 (m, 2H), 3.62 (d,  $J = 7.2$  Hz, 2H), 3.38-3.30 (m, 1H), 2.24-2.20 (m, 1H), 2.05-1.97 (m, 1H), 1.88 (t,  $J = 7.2$  Hz, 3H).  $^{13}\text{C}$  NMR (100 MHz,  $\text{CDCl}_3$ )  $\delta$  155.7, 140.4, 138.2, 128.8, 128.3, 127.7, 127.5, 126.7, 126.1, 84.2 (d,  $J = 171.0$  Hz), 55.6, 54.4 (d,  $J = 22.0$  Hz), 49.1, 42.3, 31.2, 13.3.  $^{19}\text{F}$  NMR (376 MHz,  $\text{CDCl}_3$ )  $\delta$  -227.0 (td,  $J = 47.1$ , 17.3 Hz). HRMS:  $m/z$  (ESI) calculated  $[\text{M}^+]$ : 326.1794, measured: 326.1793.

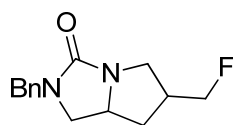

**5l**:  $^1\text{H}$  NMR (400 MHz,  $\text{CDCl}_3$ )  $\delta$  7.28 (m, 5H), 4.48 (dd,  $J = 11.4$ , 5.6 Hz, 1H), 4.40 (s, 2H), 4.31 (dd,  $J = 11.4$ , 5.6 Hz, 1H), 4.00 (dd,  $J = 12.2$ , 8.7 Hz, 1H), 3.80-3.63 (m, 1H), 3.41 (t,  $J = 8.6$  Hz, 1H), 3.06 (d,  $J = 9.3$  Hz, 1H), 2.86 (dd,  $J = 12.4$ , 5.5 Hz, 1H), 2.71-2.48 (m, 1H), 1.91 (ddd,  $J = 12.7$ , 6.6, 3.0 Hz, 1H), 1.56 (m, 1H).  $^{13}\text{C}$  NMR (100 MHz,  $\text{CDCl}_3$ )  $\delta$  163.2, 136.8, 128.6, 127.9, 127.5, 85.0 (d,  $J = 169.0$  Hz), 55.27, 47.8 (d,  $J = 7.0$  Hz), 47.7, 46.8, 38.7 (d,  $J = 18.0$  Hz), 33.4 (d,  $J = 7.0$  Hz).  $^{19}\text{F}$  NMR (376 MHz,  $\text{CDCl}_3$ )  $\delta$  -222.8 (td,  $J = 47.1$ , 23.7 Hz). HRMS:  $m/z$  (ESI) calculated  $[\text{M}^+]$ : 248.1325, measured: 248.1321.

## 6 References

- (S1) (a) Yu, R. T.; Rovis, T. *J. Am. Chem. Soc.* **2006**, *128*, 2782-2783. (b) Yu, R. T.; Rovis, T. *J. Am. Chem. Soc.* **2006**, *128*, 12370-12371. (c) Friedman, R. K.; Rovis, T. *J. Am. Chem. Soc.* **2009**, *131*, 10775-10782. (d) Bender, C. F.; Widenhofer, R. A. *J. Am. Chem. Soc.* **2005**, *127*, 1070-1071.
- (S2) (a) Zhang, G.; Luo, Y.; Wang, Yan.; Zhang, L. *Angew. Chem. Int. Ed.* **2011**, *50*, 4450-4454. (b) Sequeira, F. C.; Turnpenny, B. W.; Chemler, S. R. *Angew. Chem. Int. Ed.* **2010**,

49, 6365-6368.

(S3) White, P. B.; Stahl, S. S. *J. Am. Chem. Soc.* **2011**, *133*, 18594-18597.

(S4) Ye, C.; Twanley, B.; Shreeve, J. M. *Org. Lett.* **2005**, *7*, 3961-3964.

(S5) Thomas, R.; Chen, C. L.; Habicher, W. D. *J. Org. Chem.* **1995**, *60*, 8120 – 8121.
