# Supplementary figures and images for: Regioselective palladium-catalyzed intramolecular oxidative aminofluorination of unactivated alkenes
Source: Royal Society of Chemistry journal article supplement (doi:10.1039/c3cc44711a), 2013-01-01

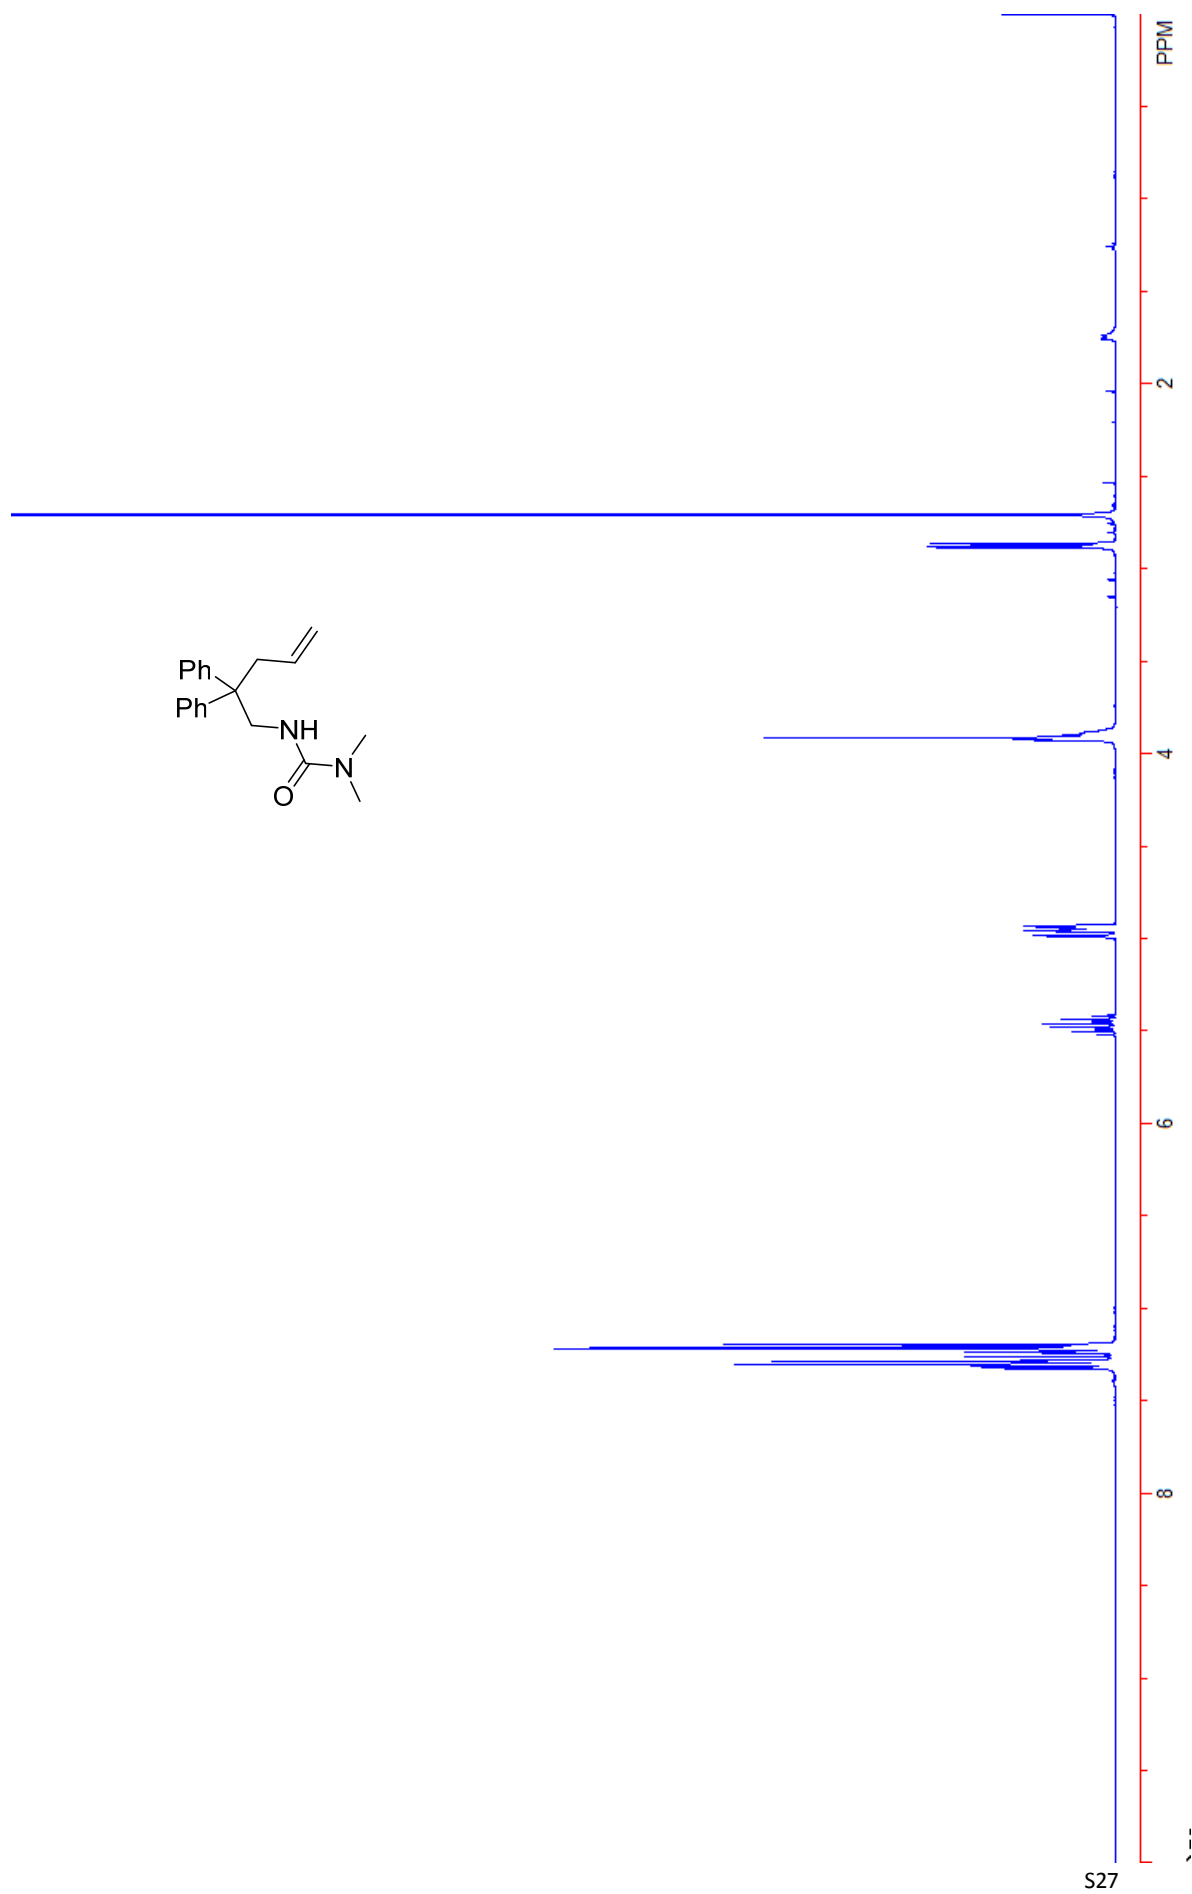

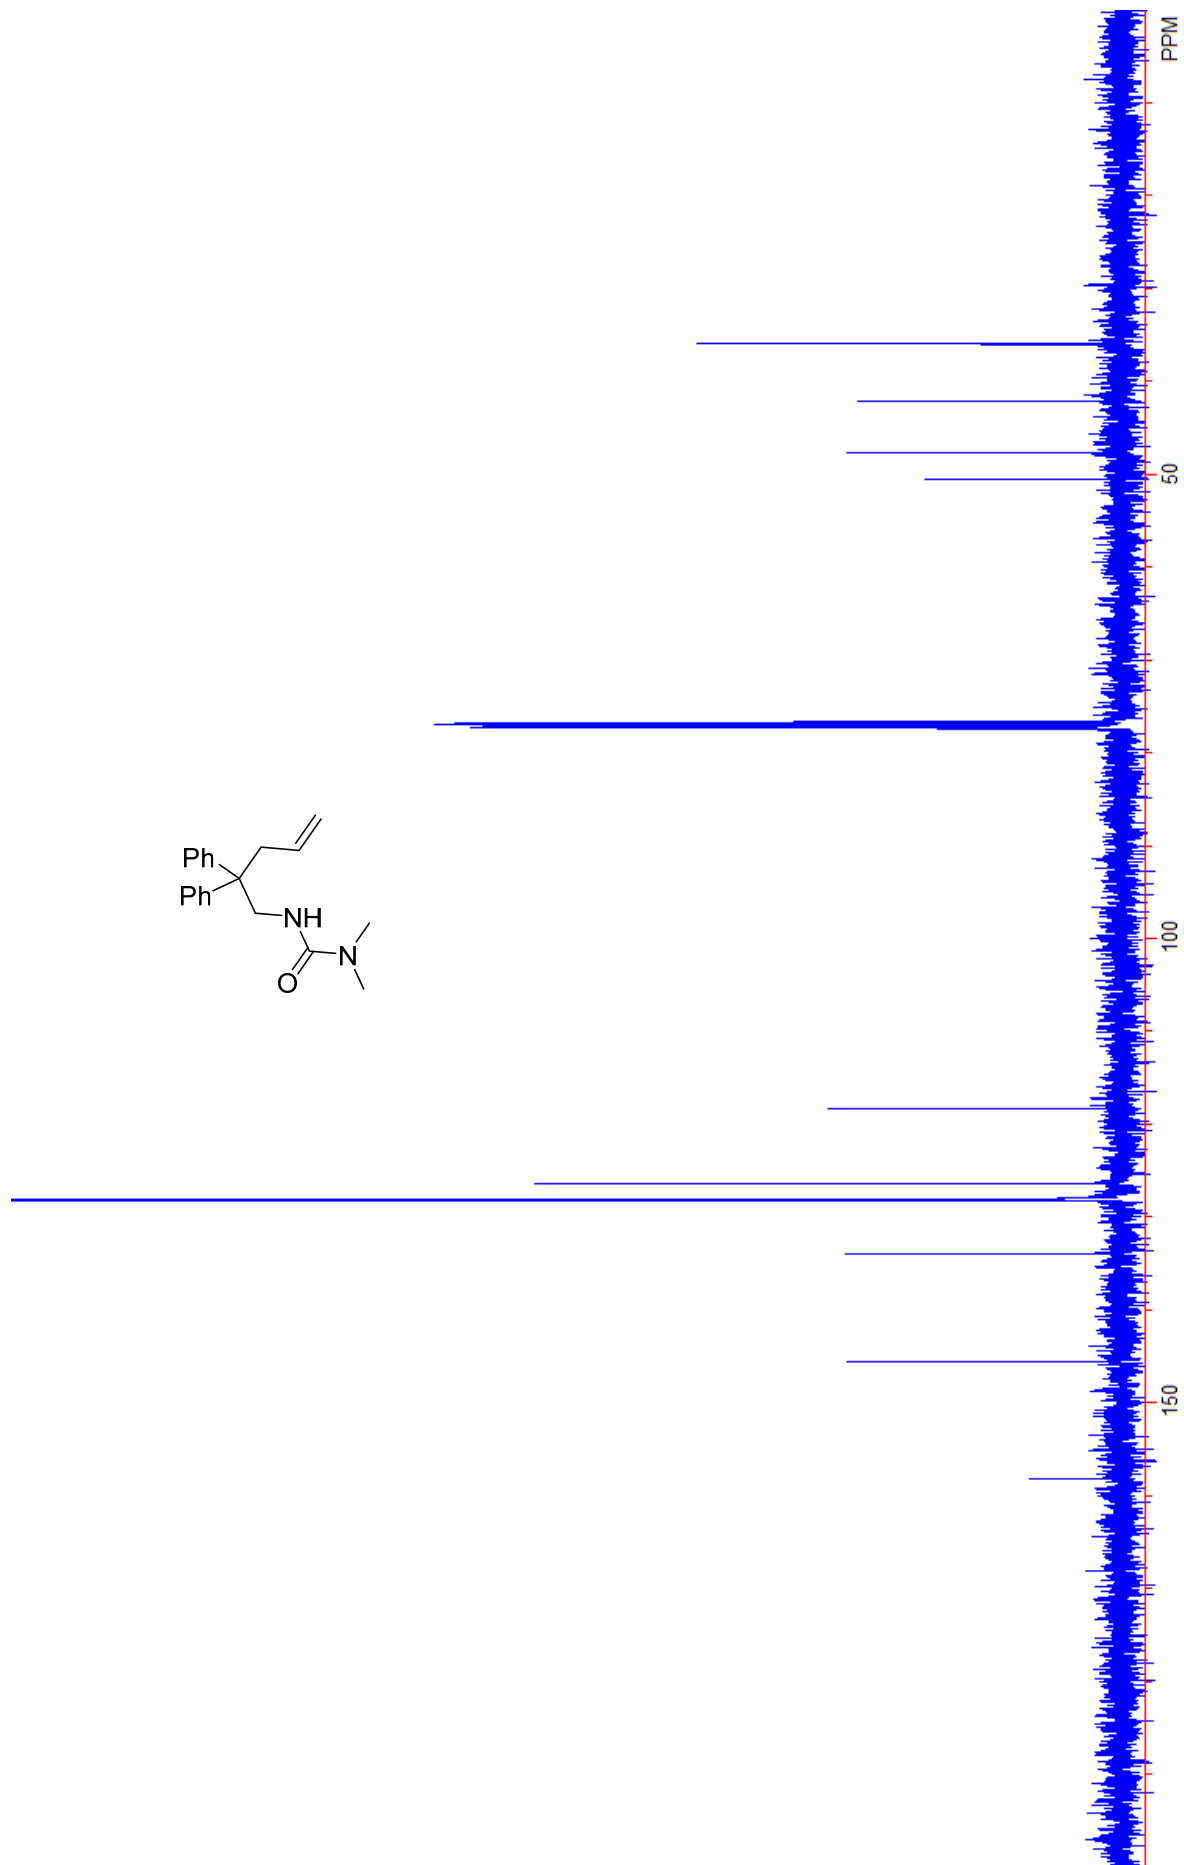

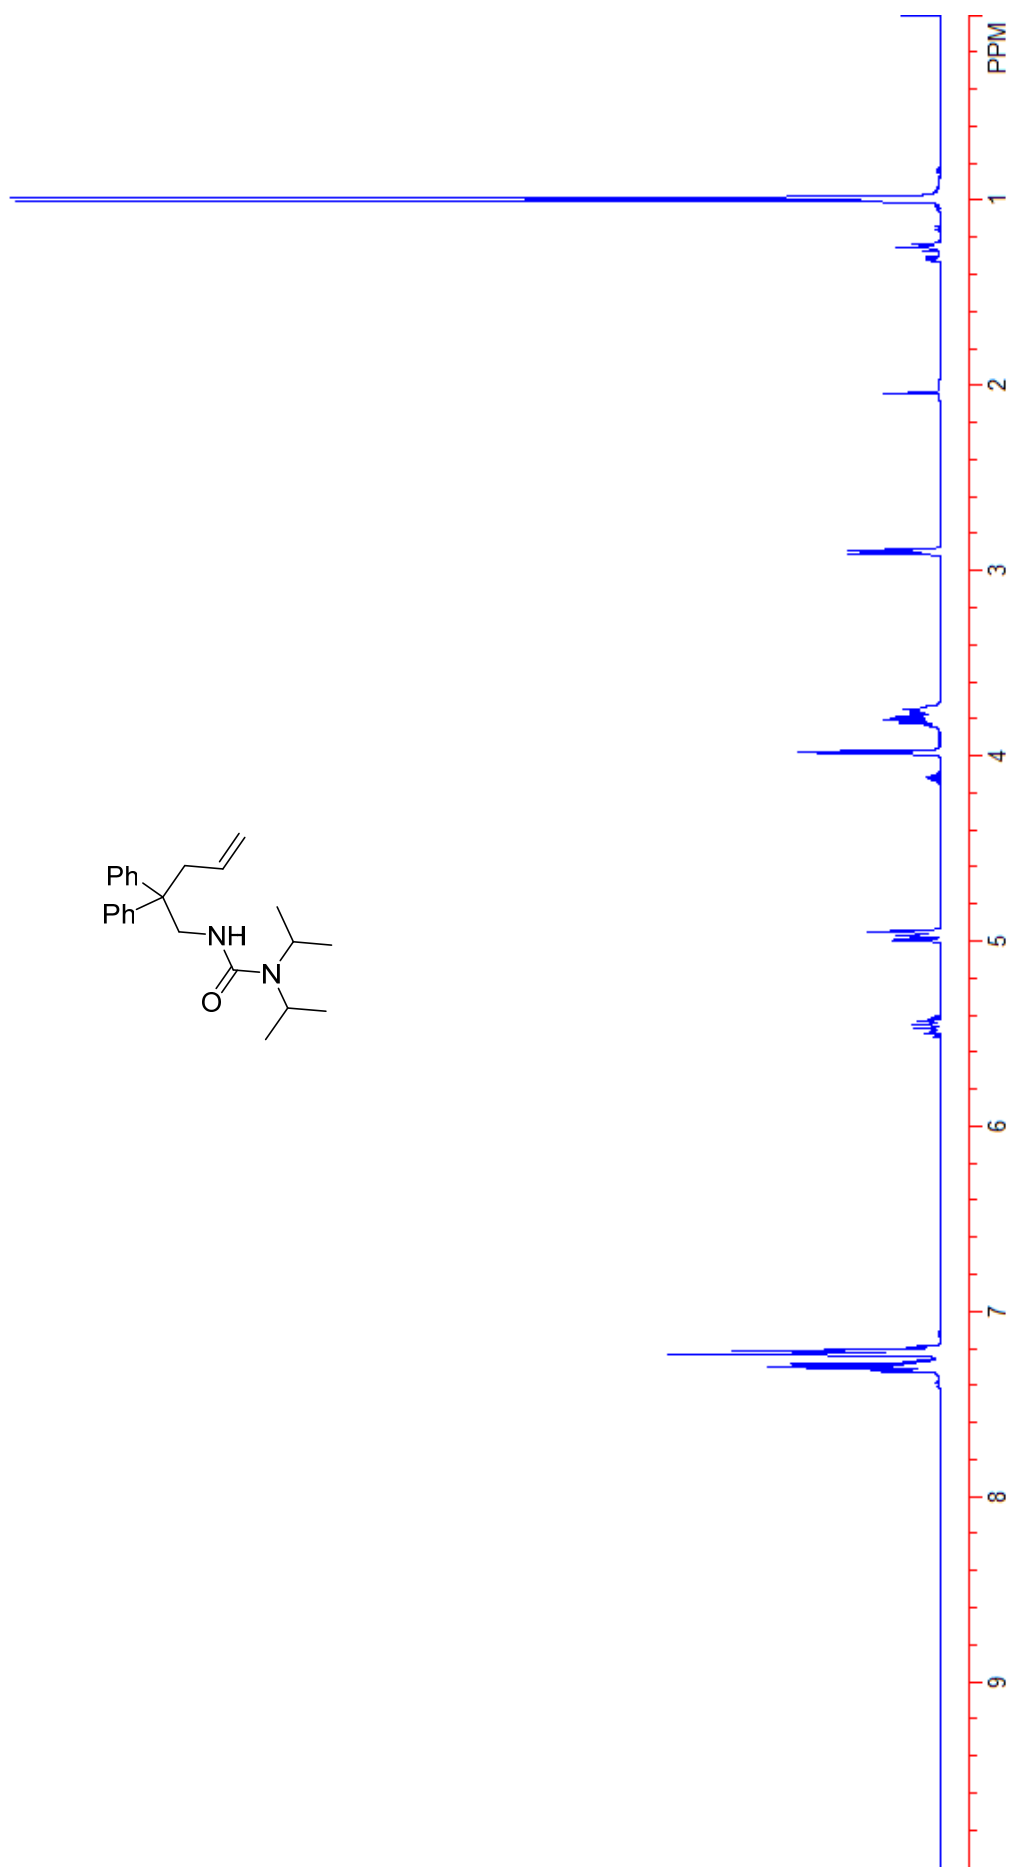

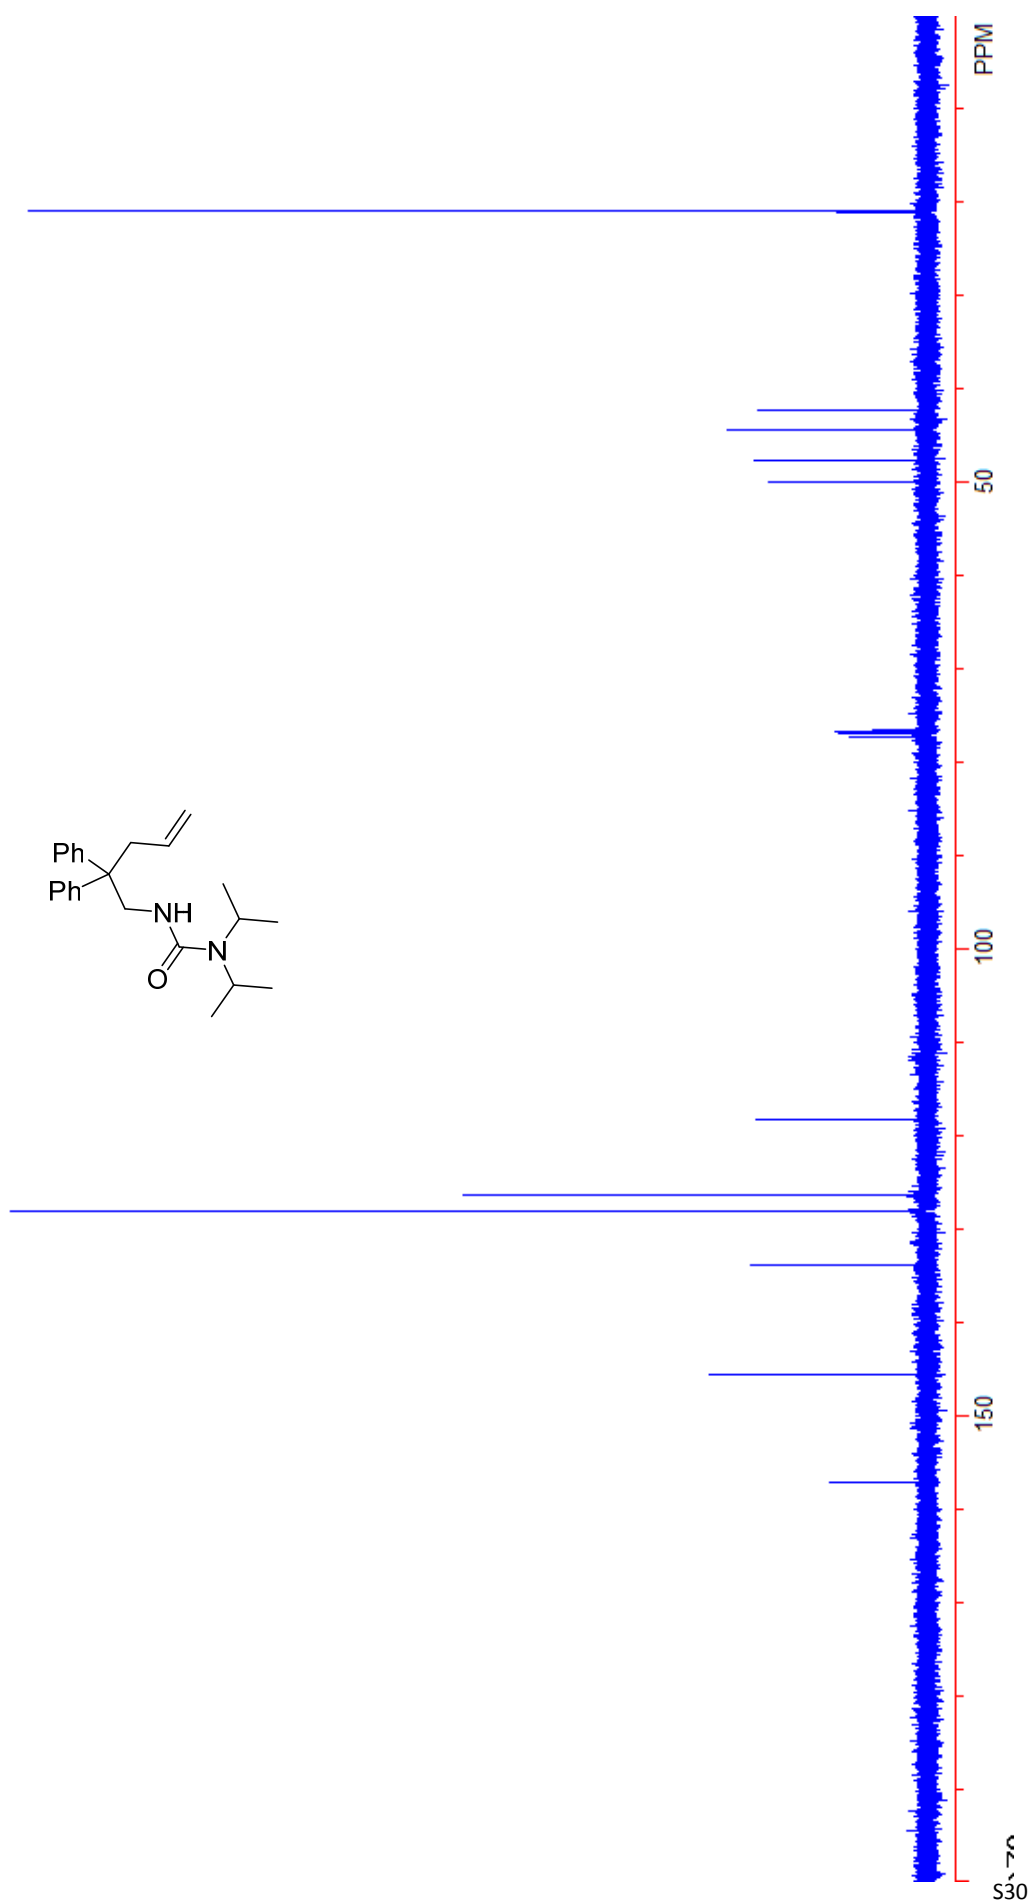

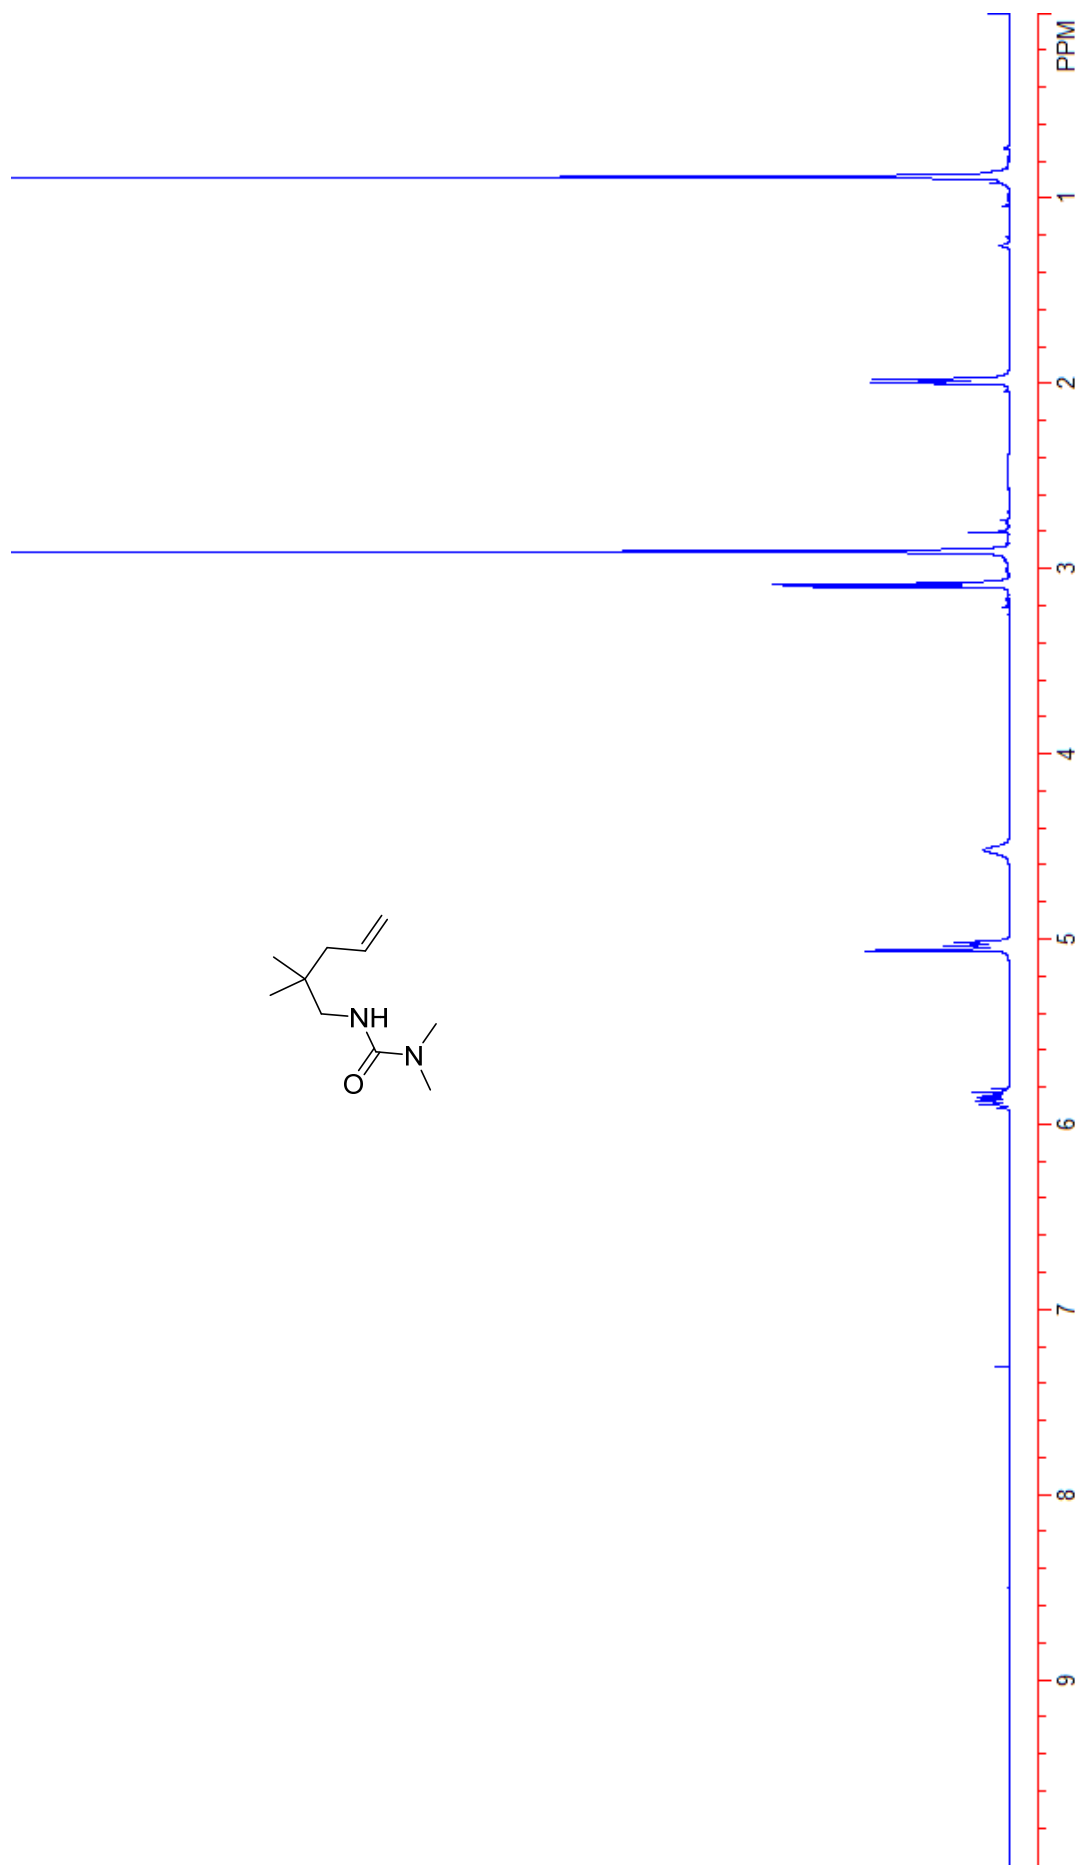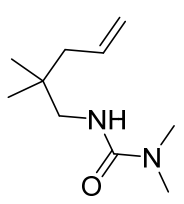

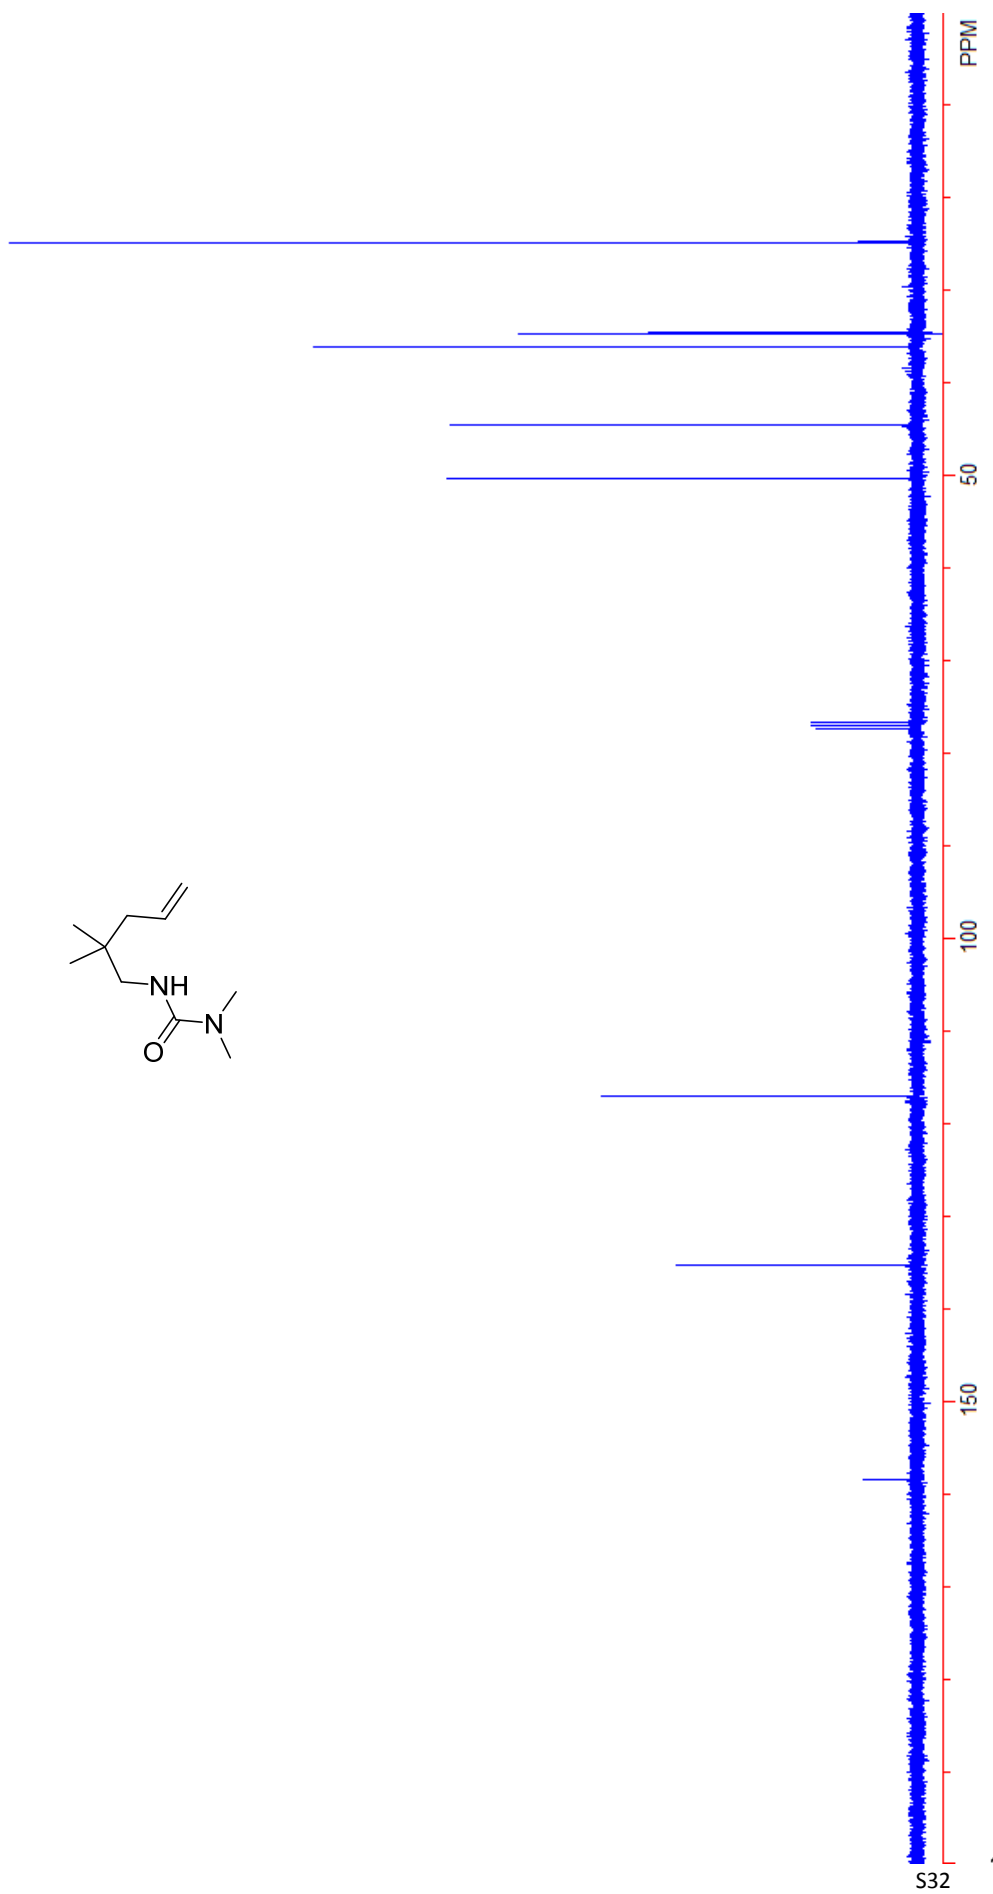

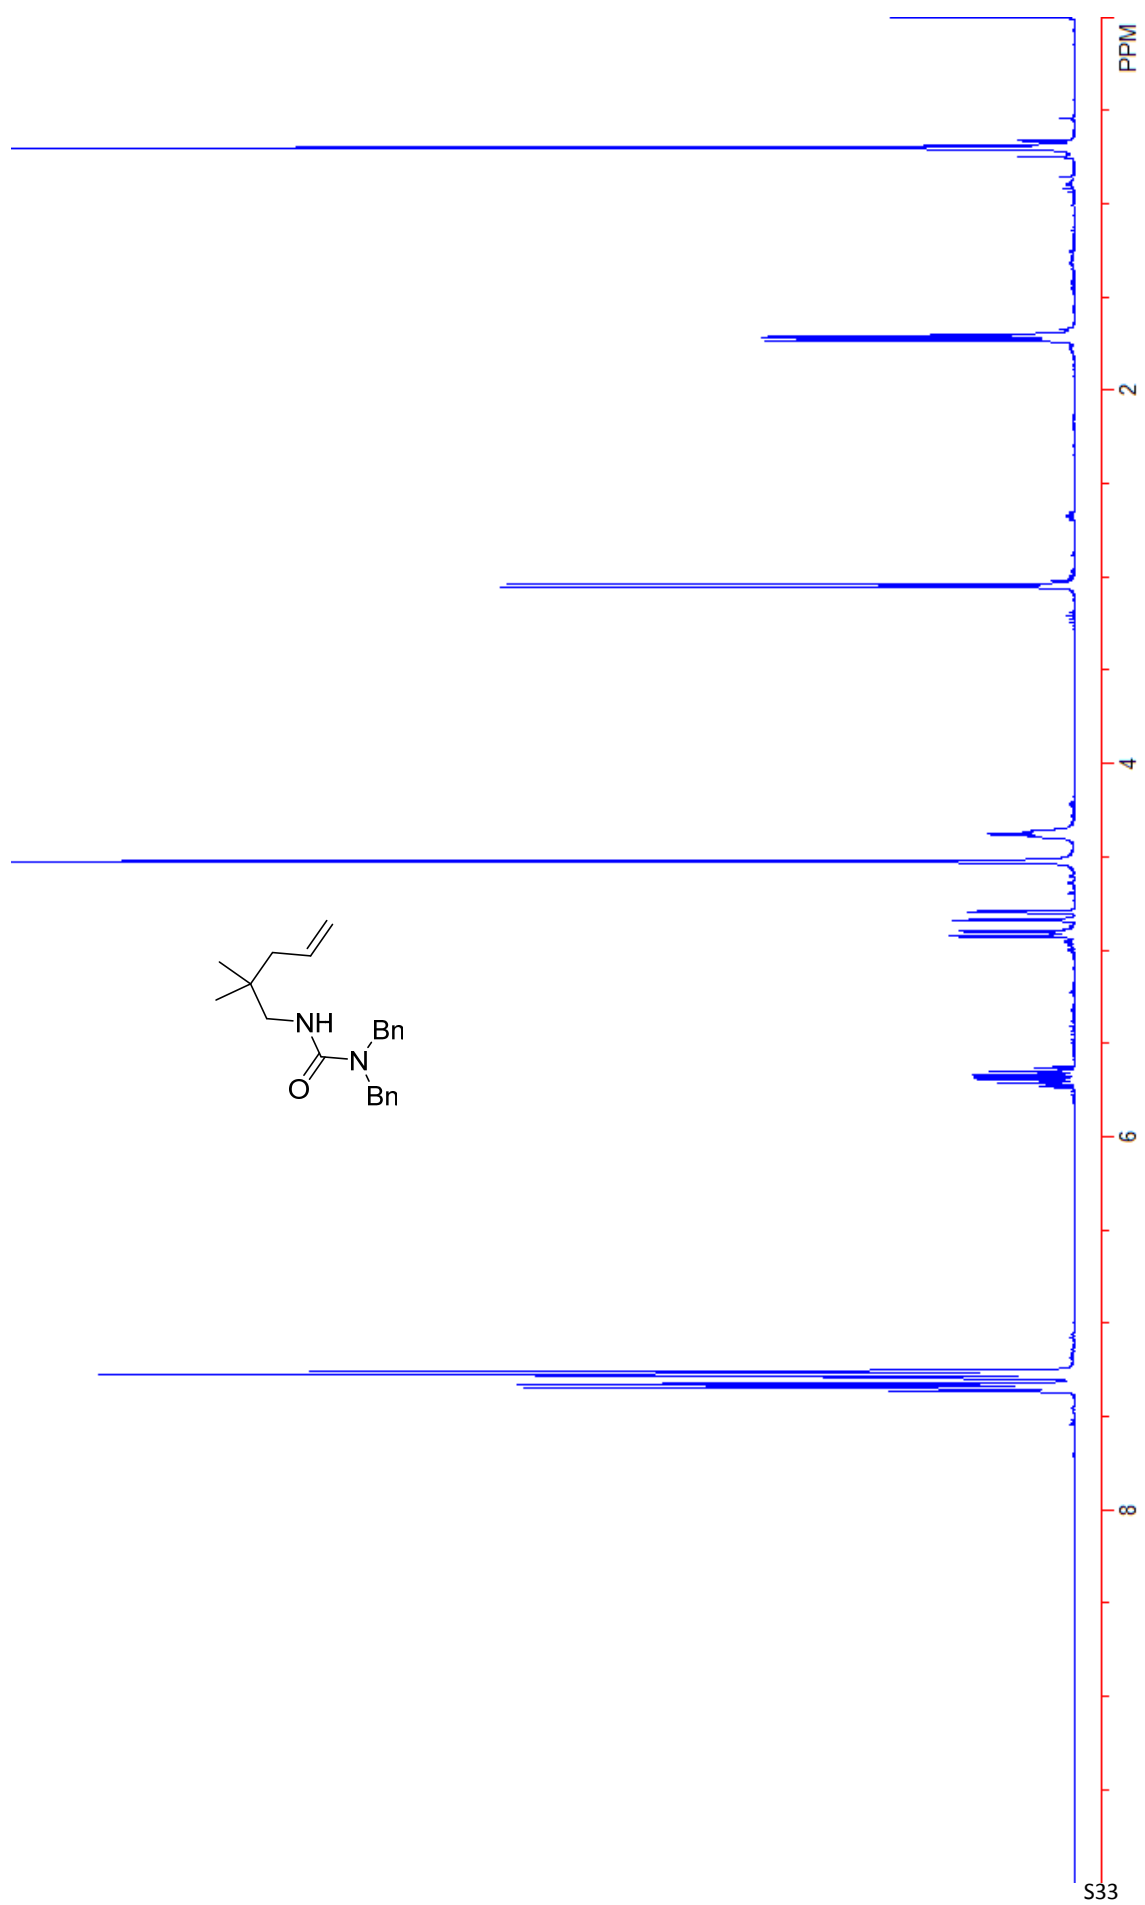

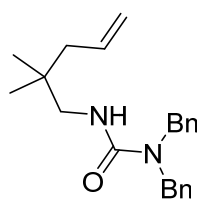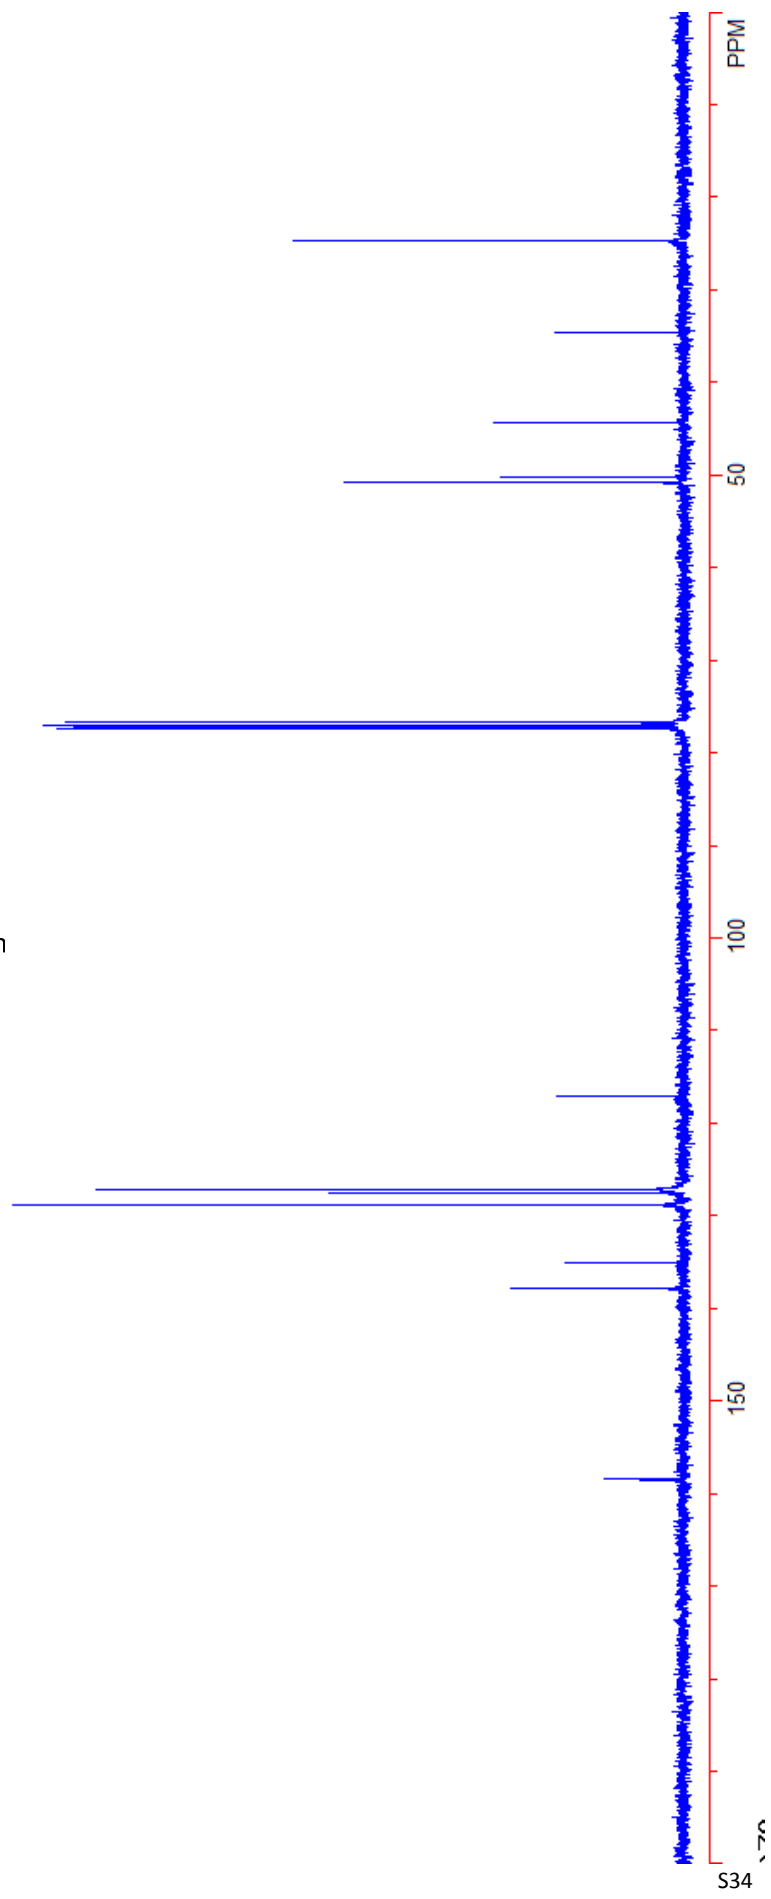



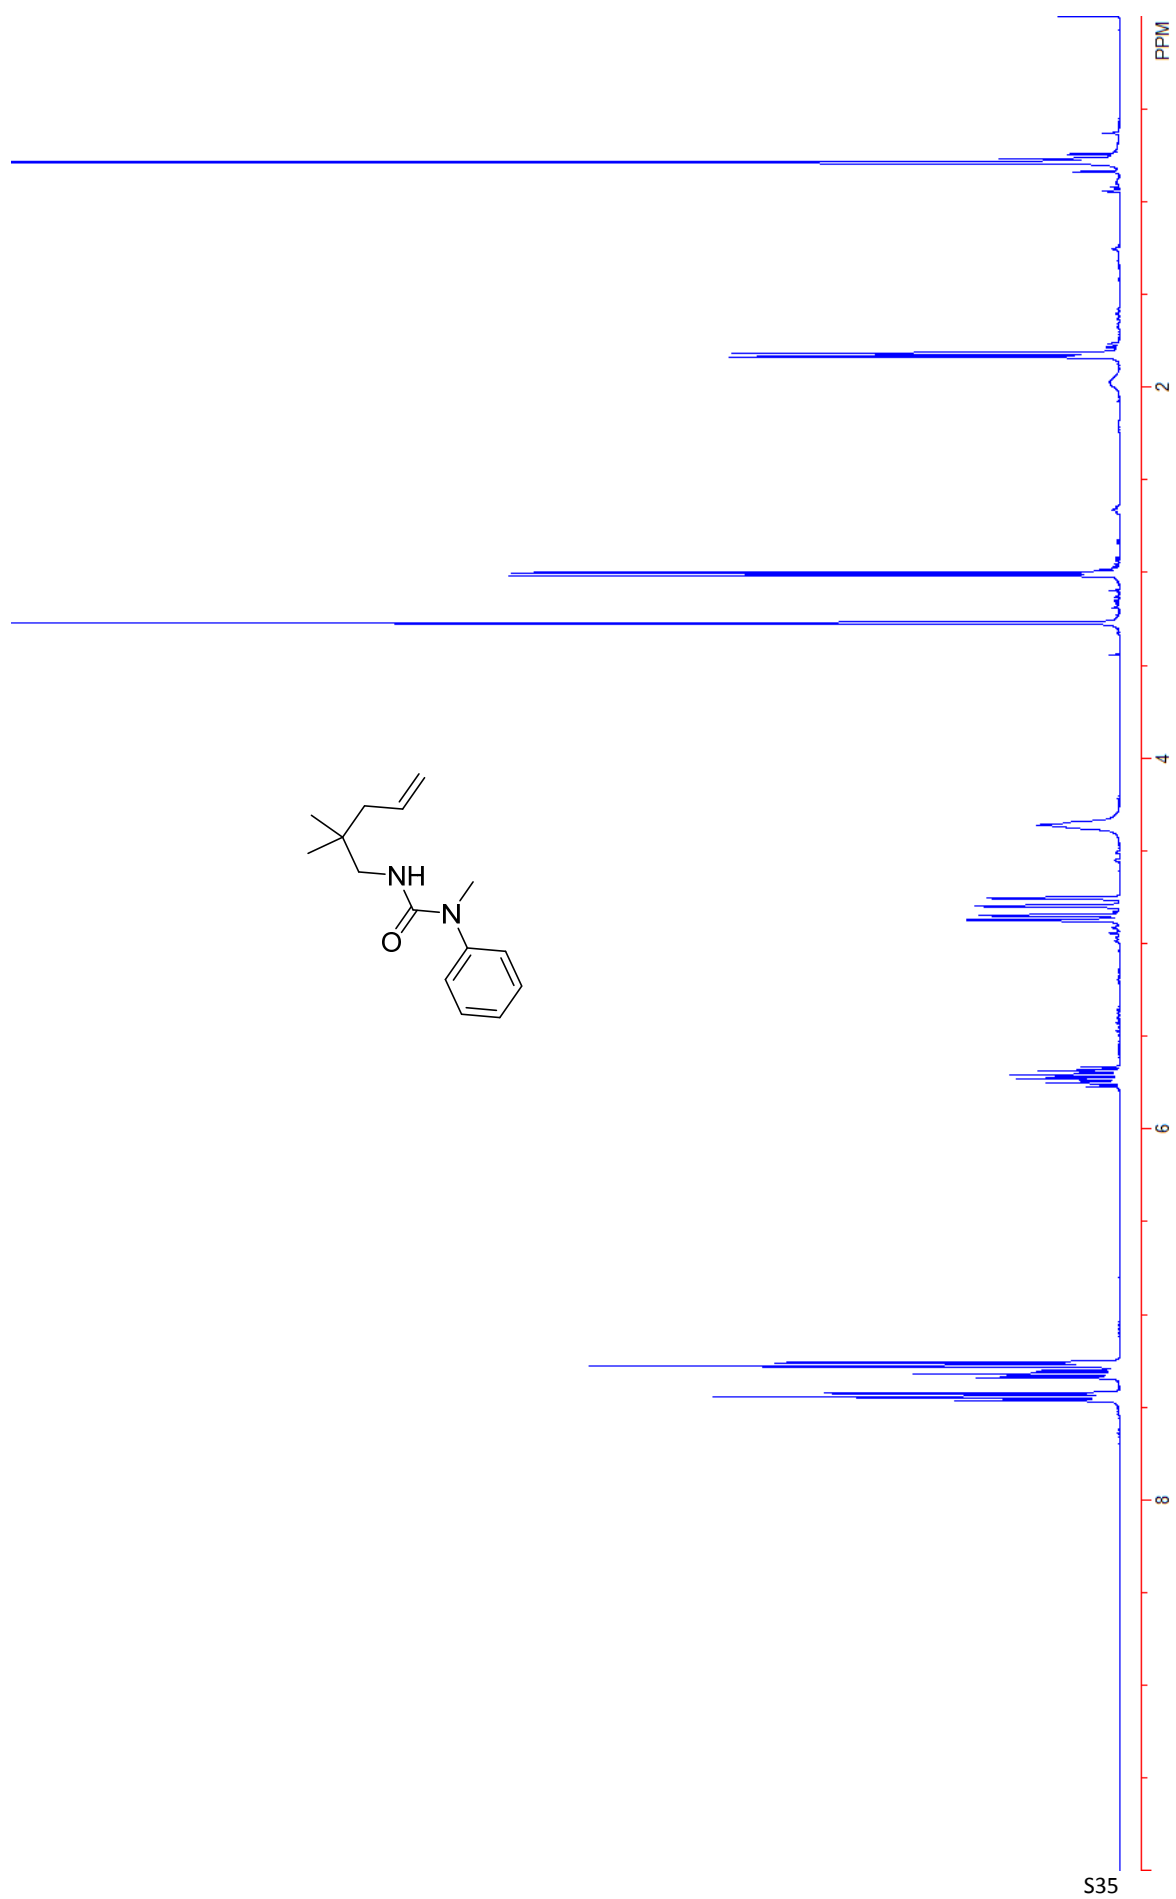

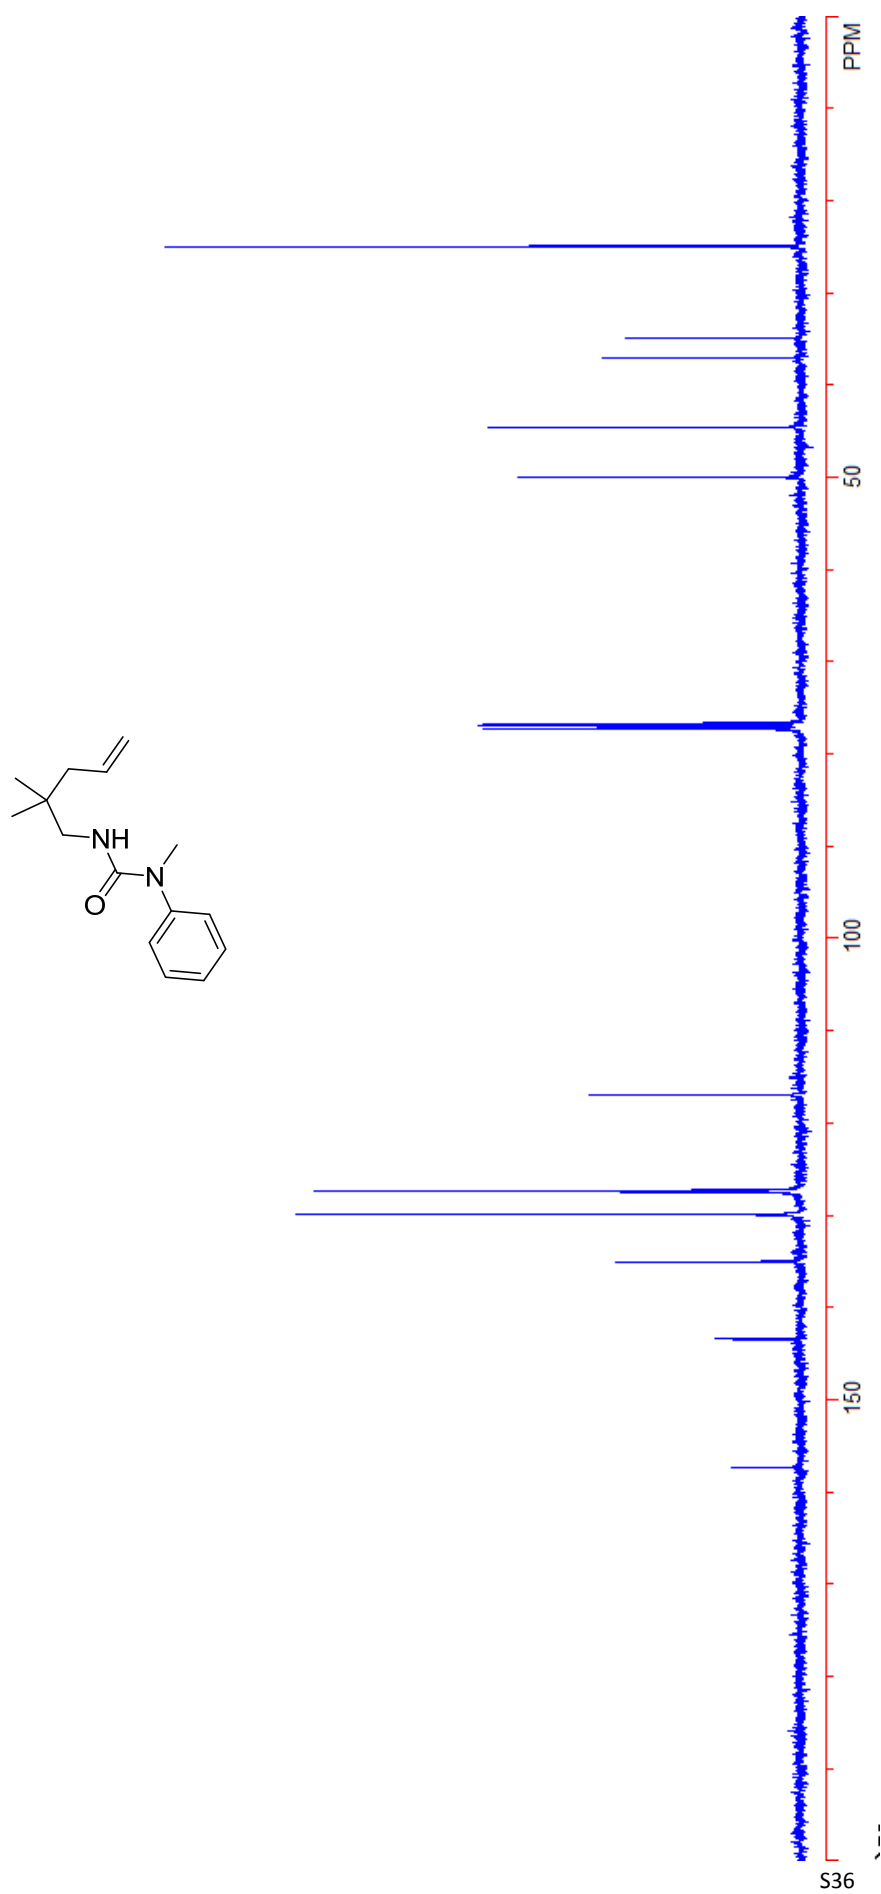

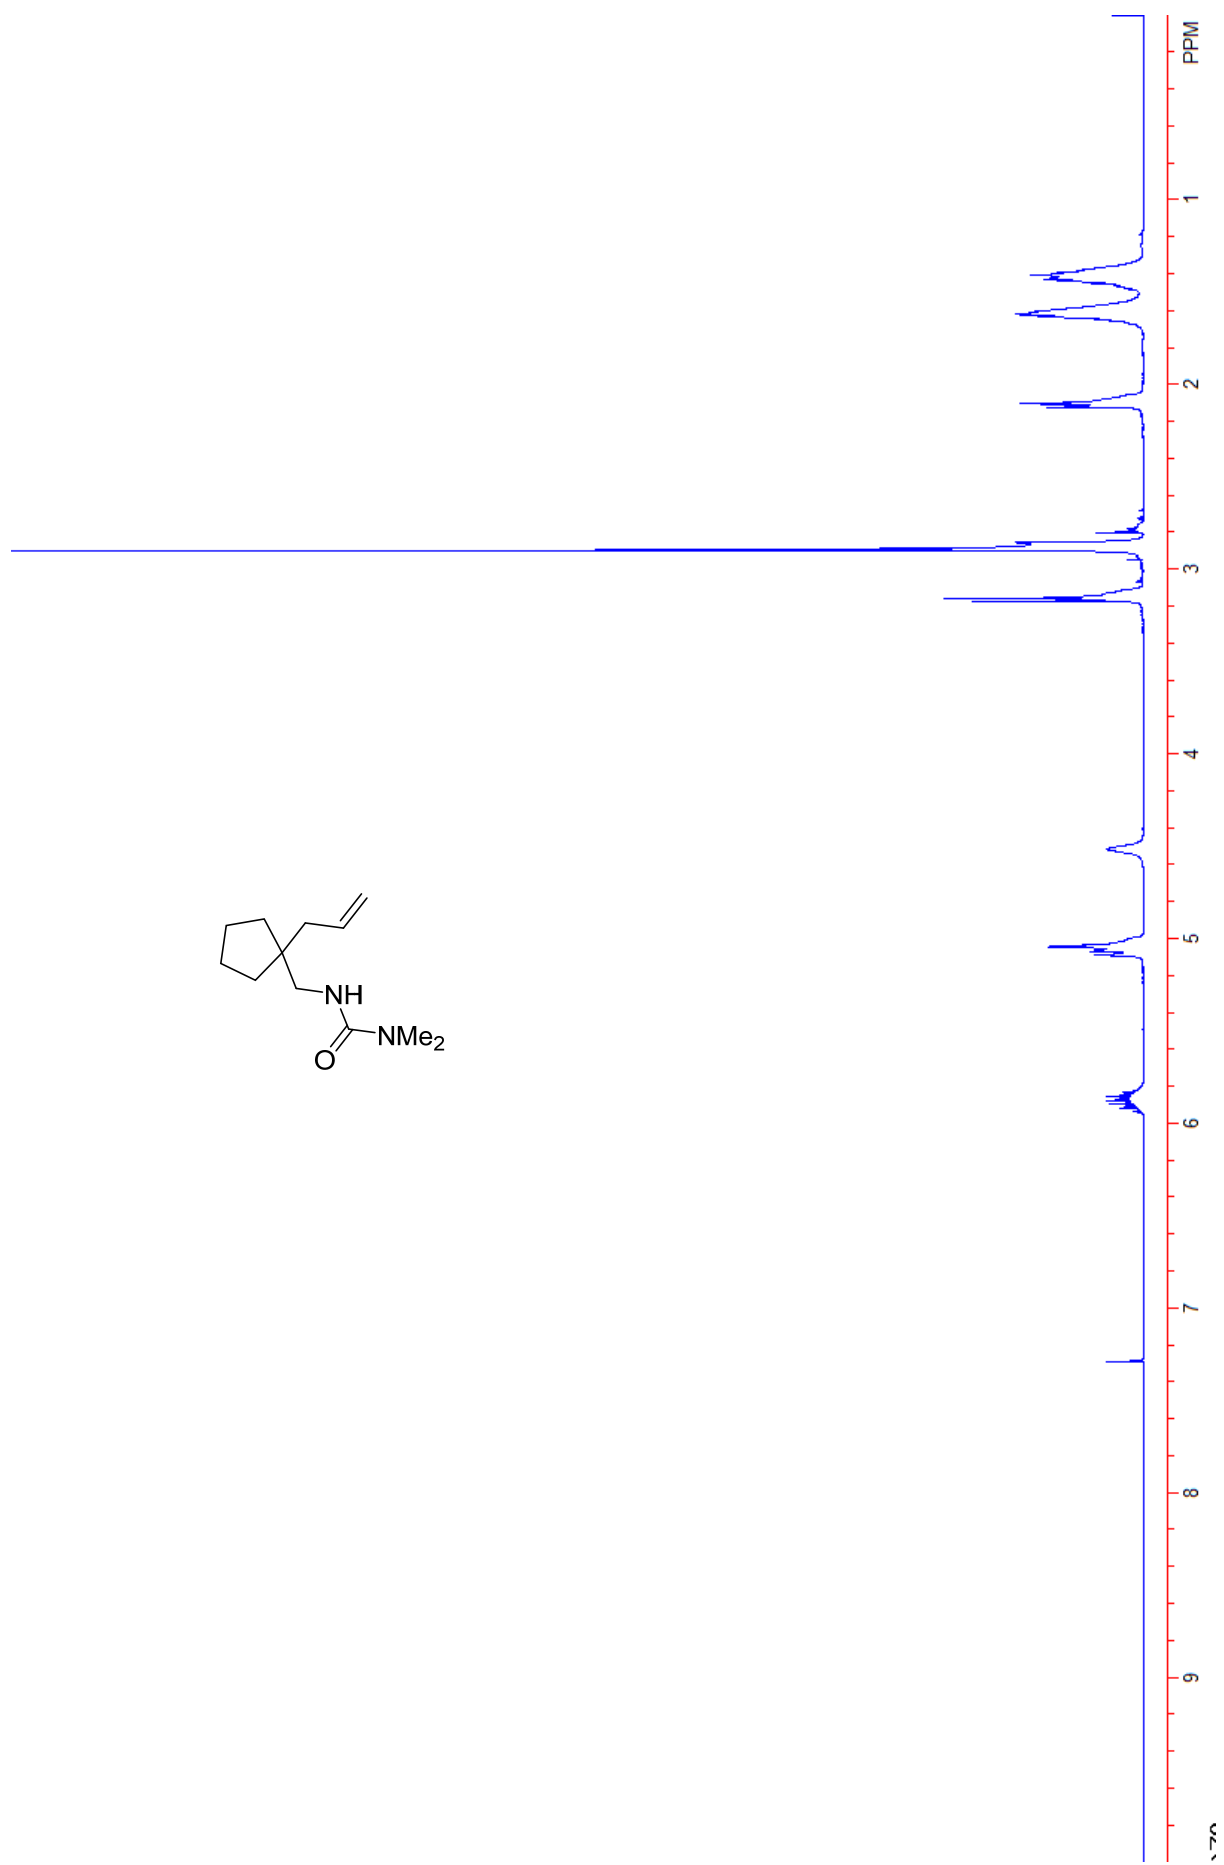

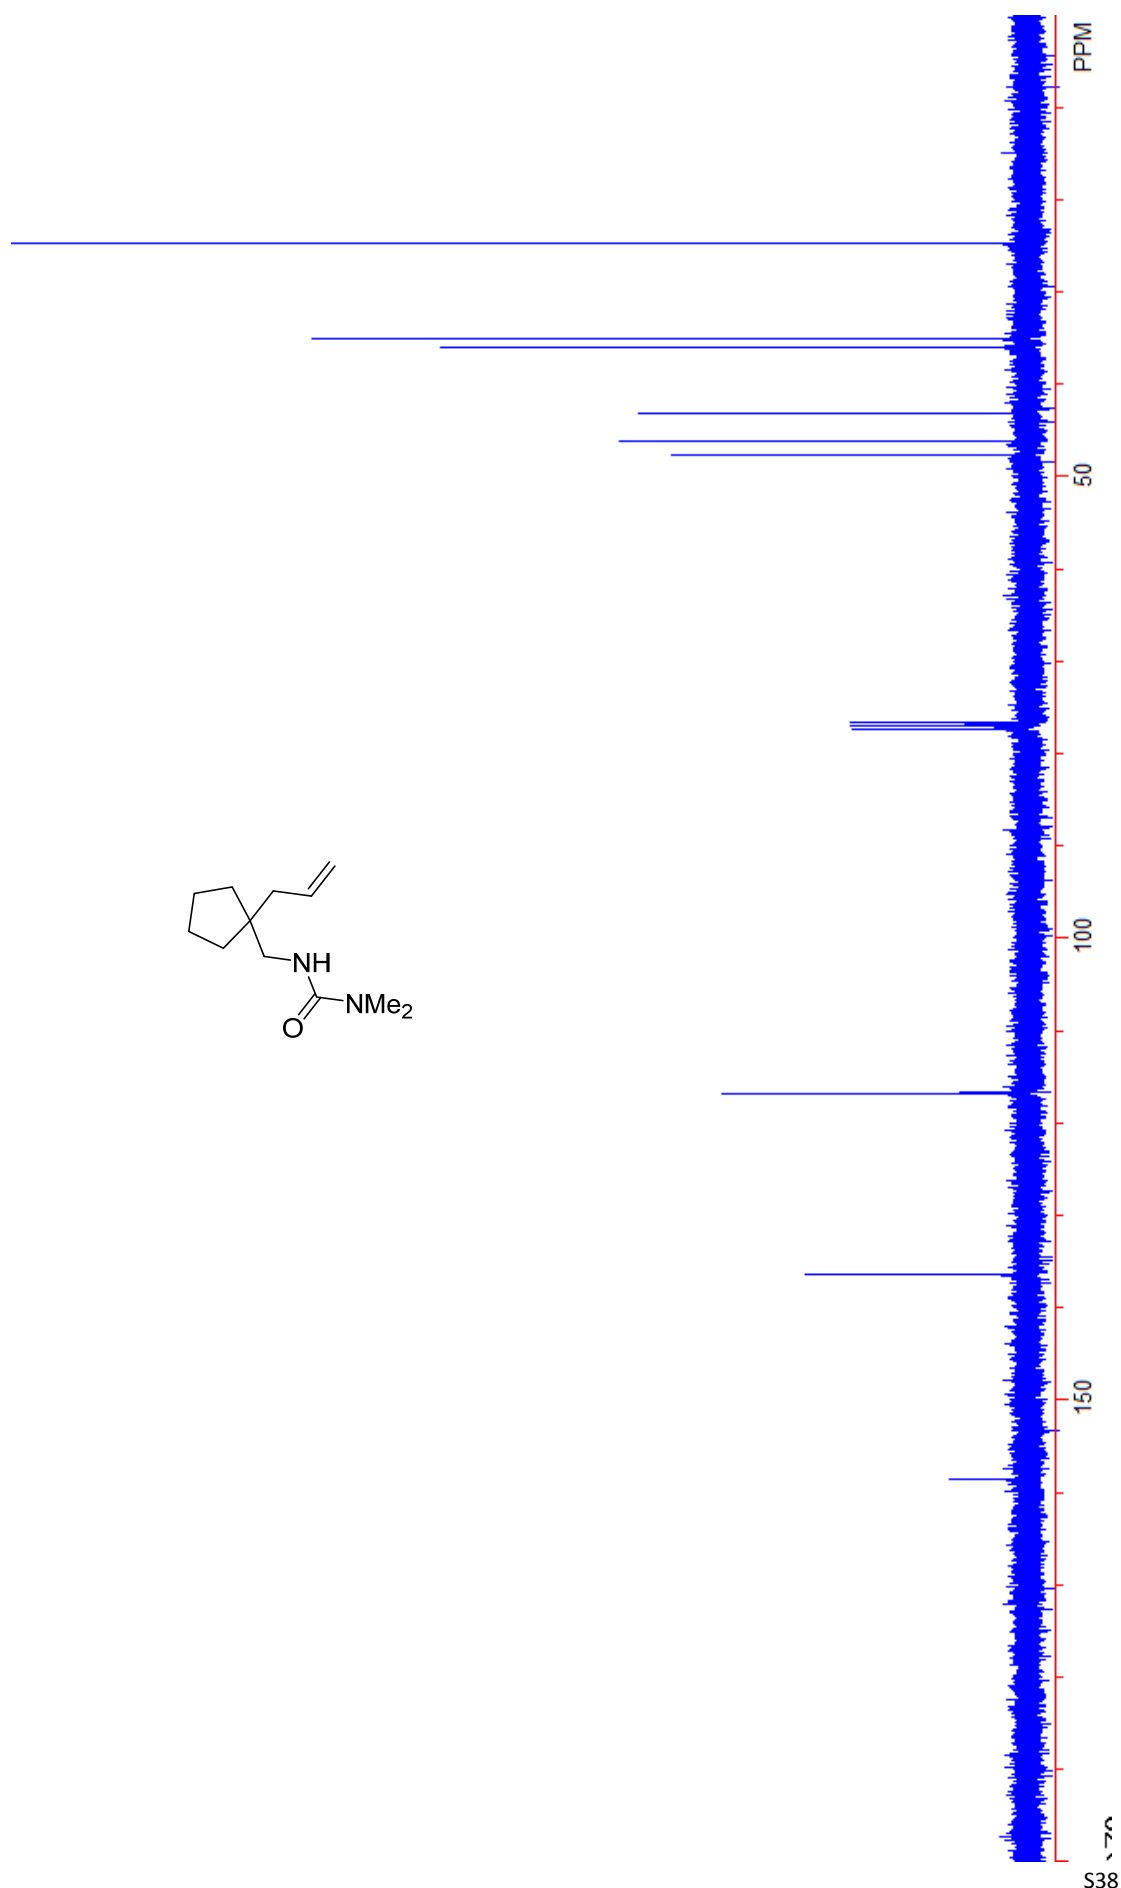

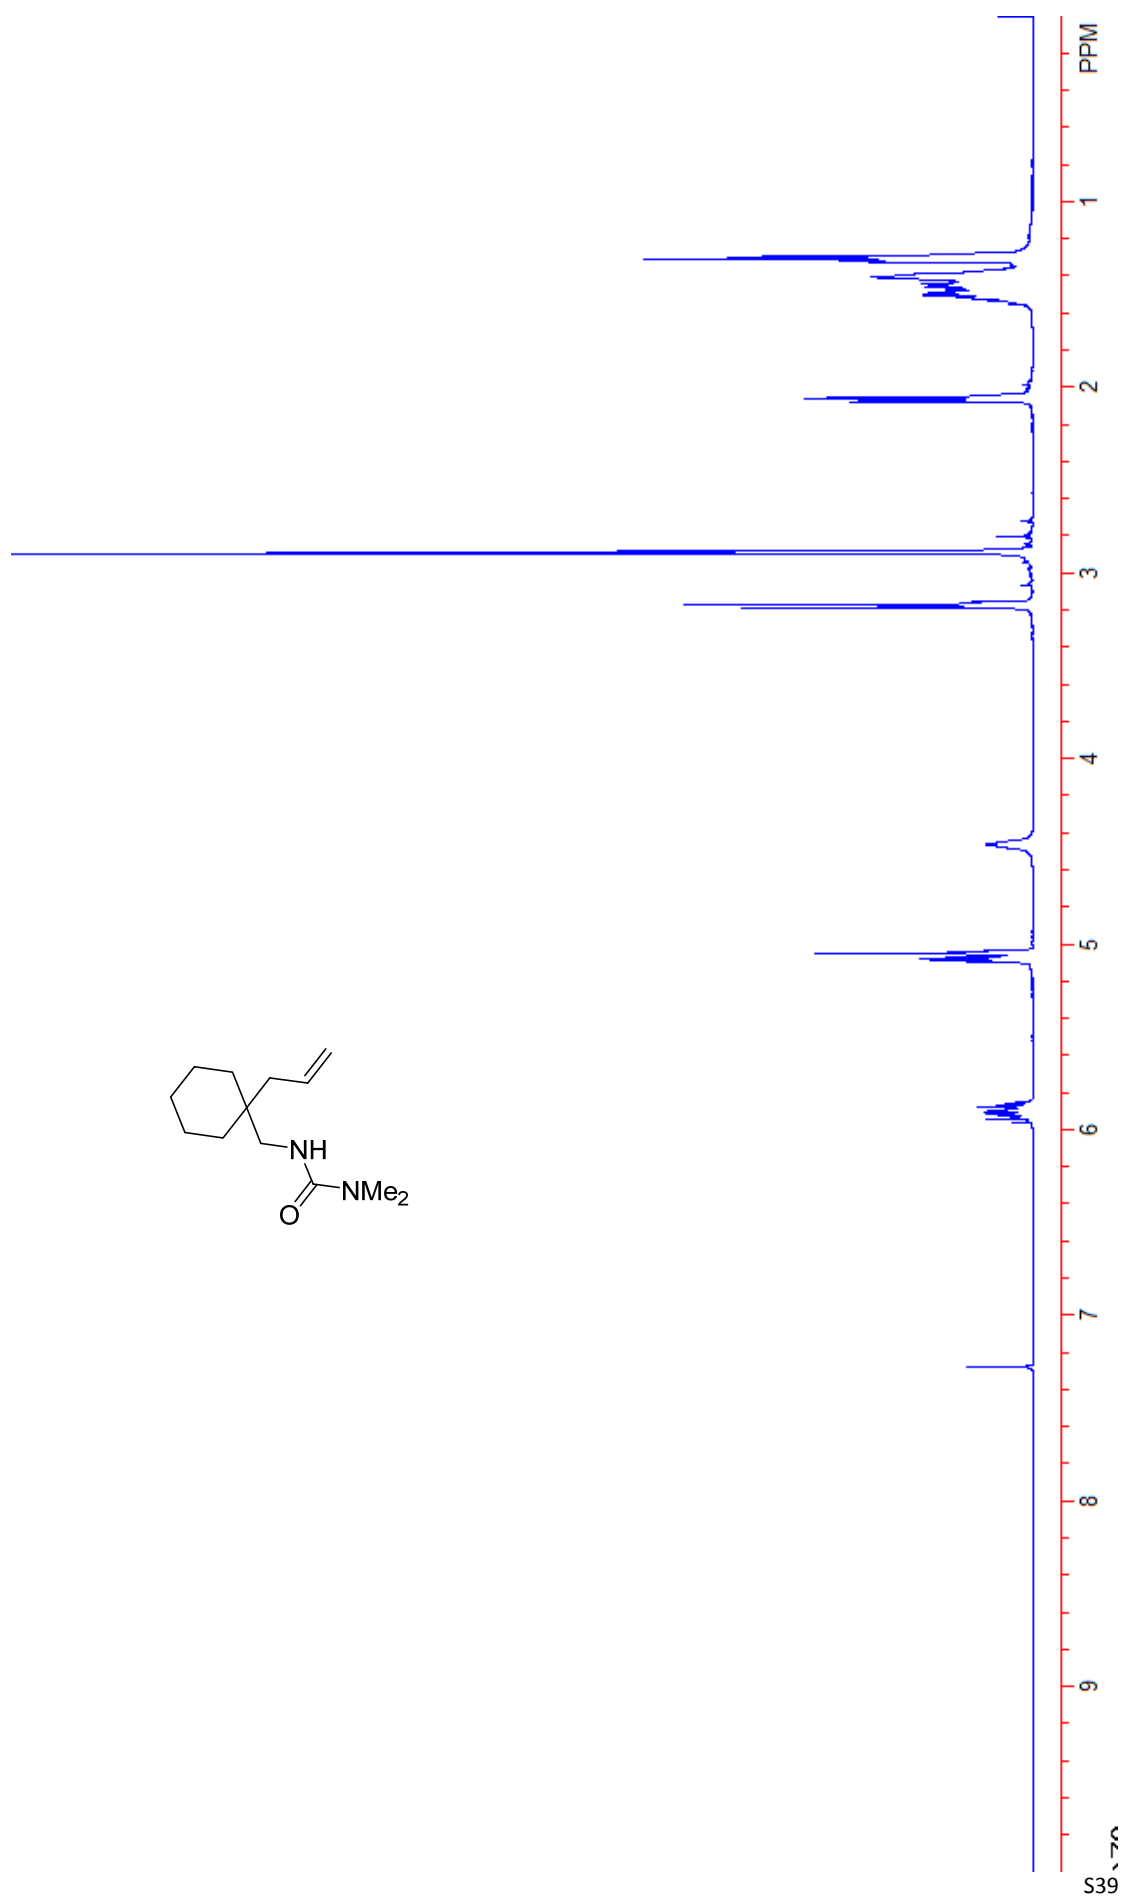

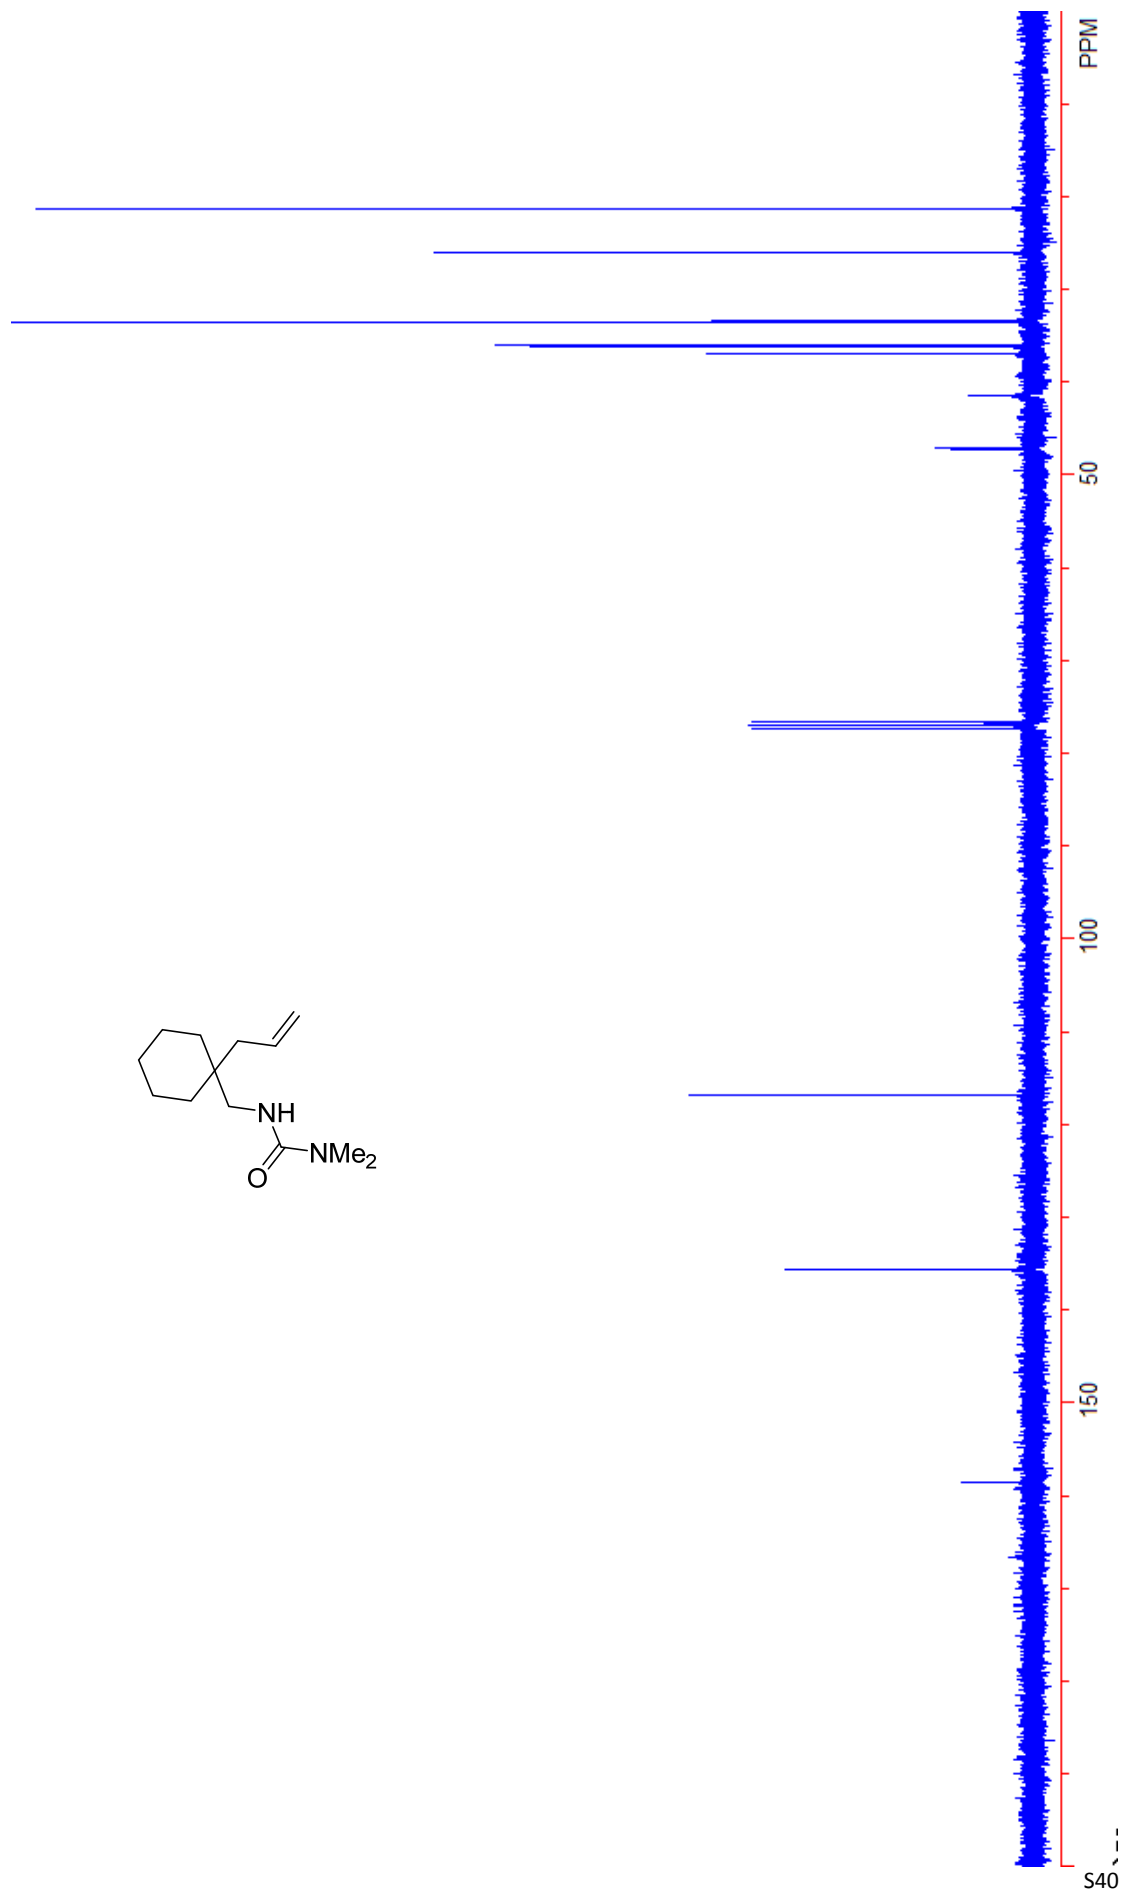

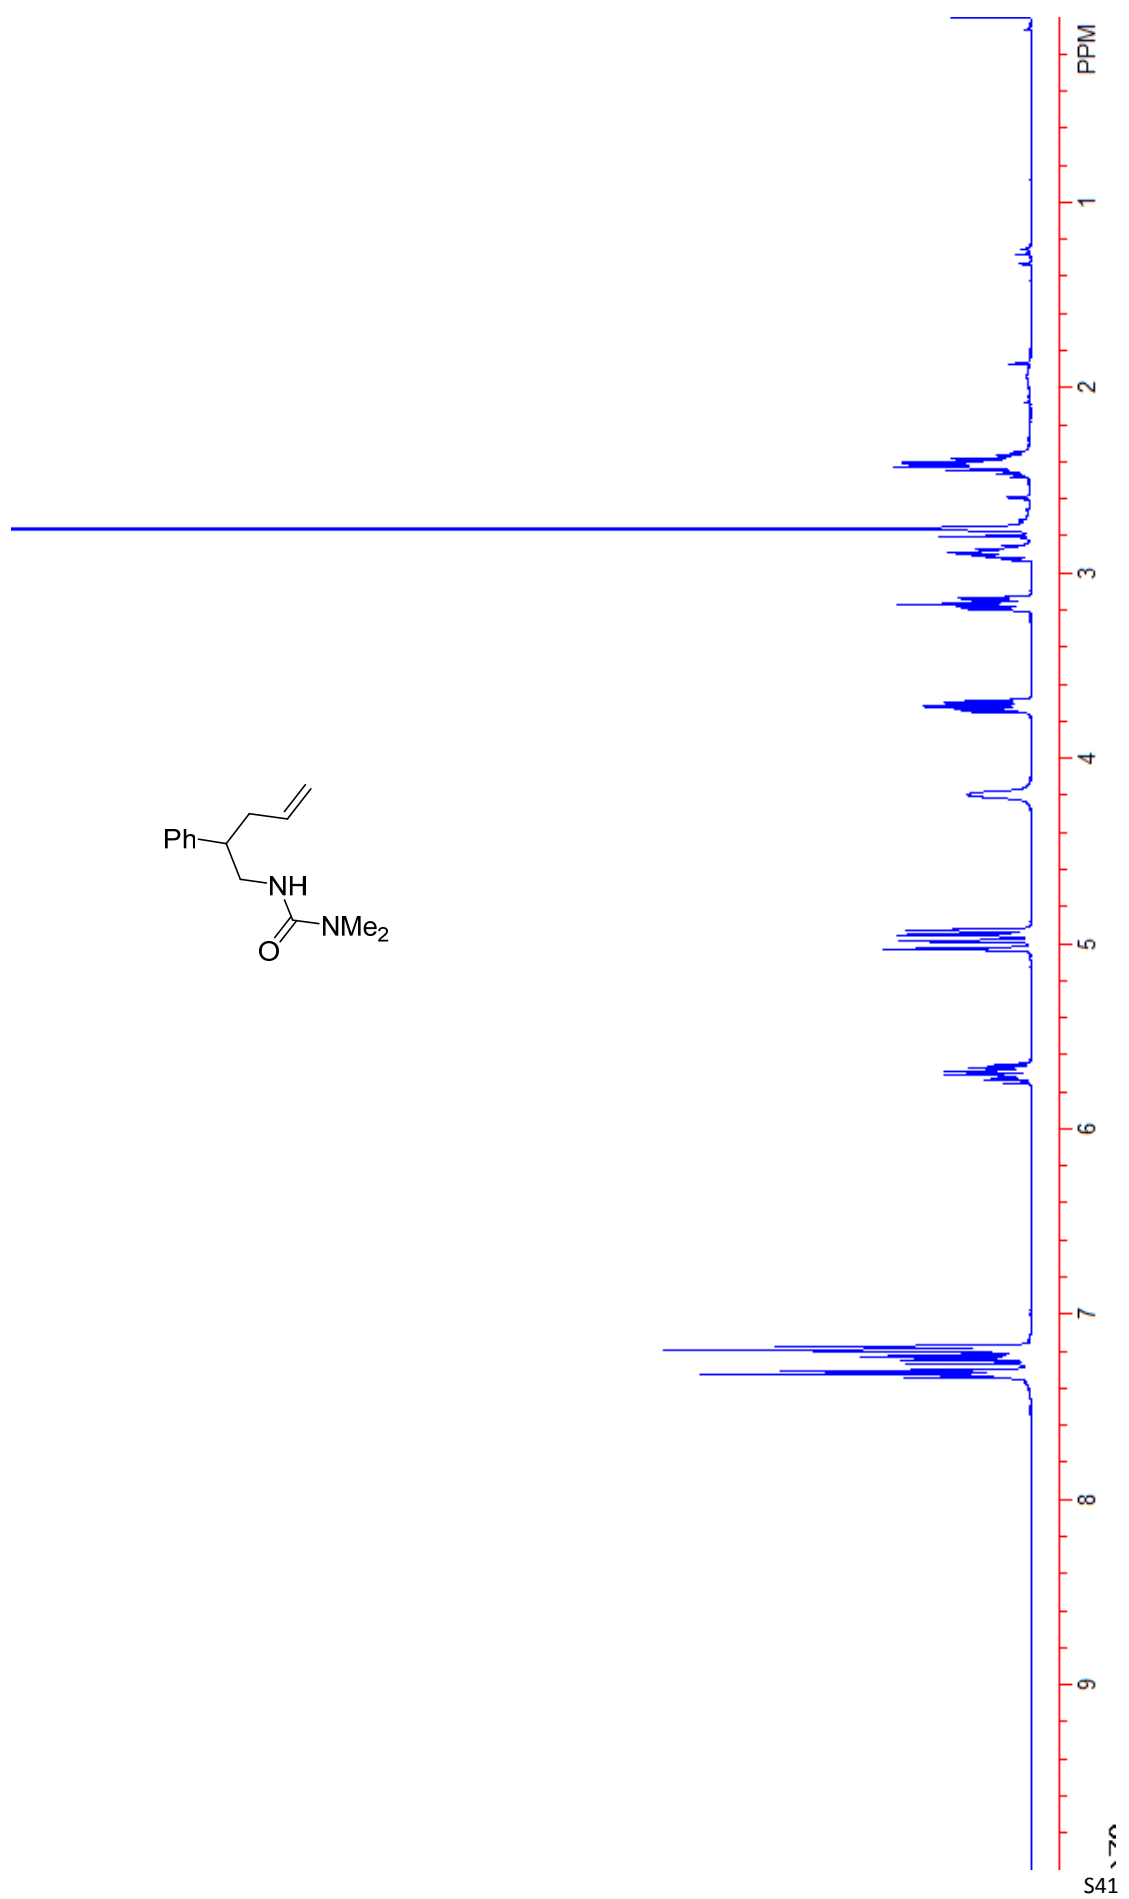

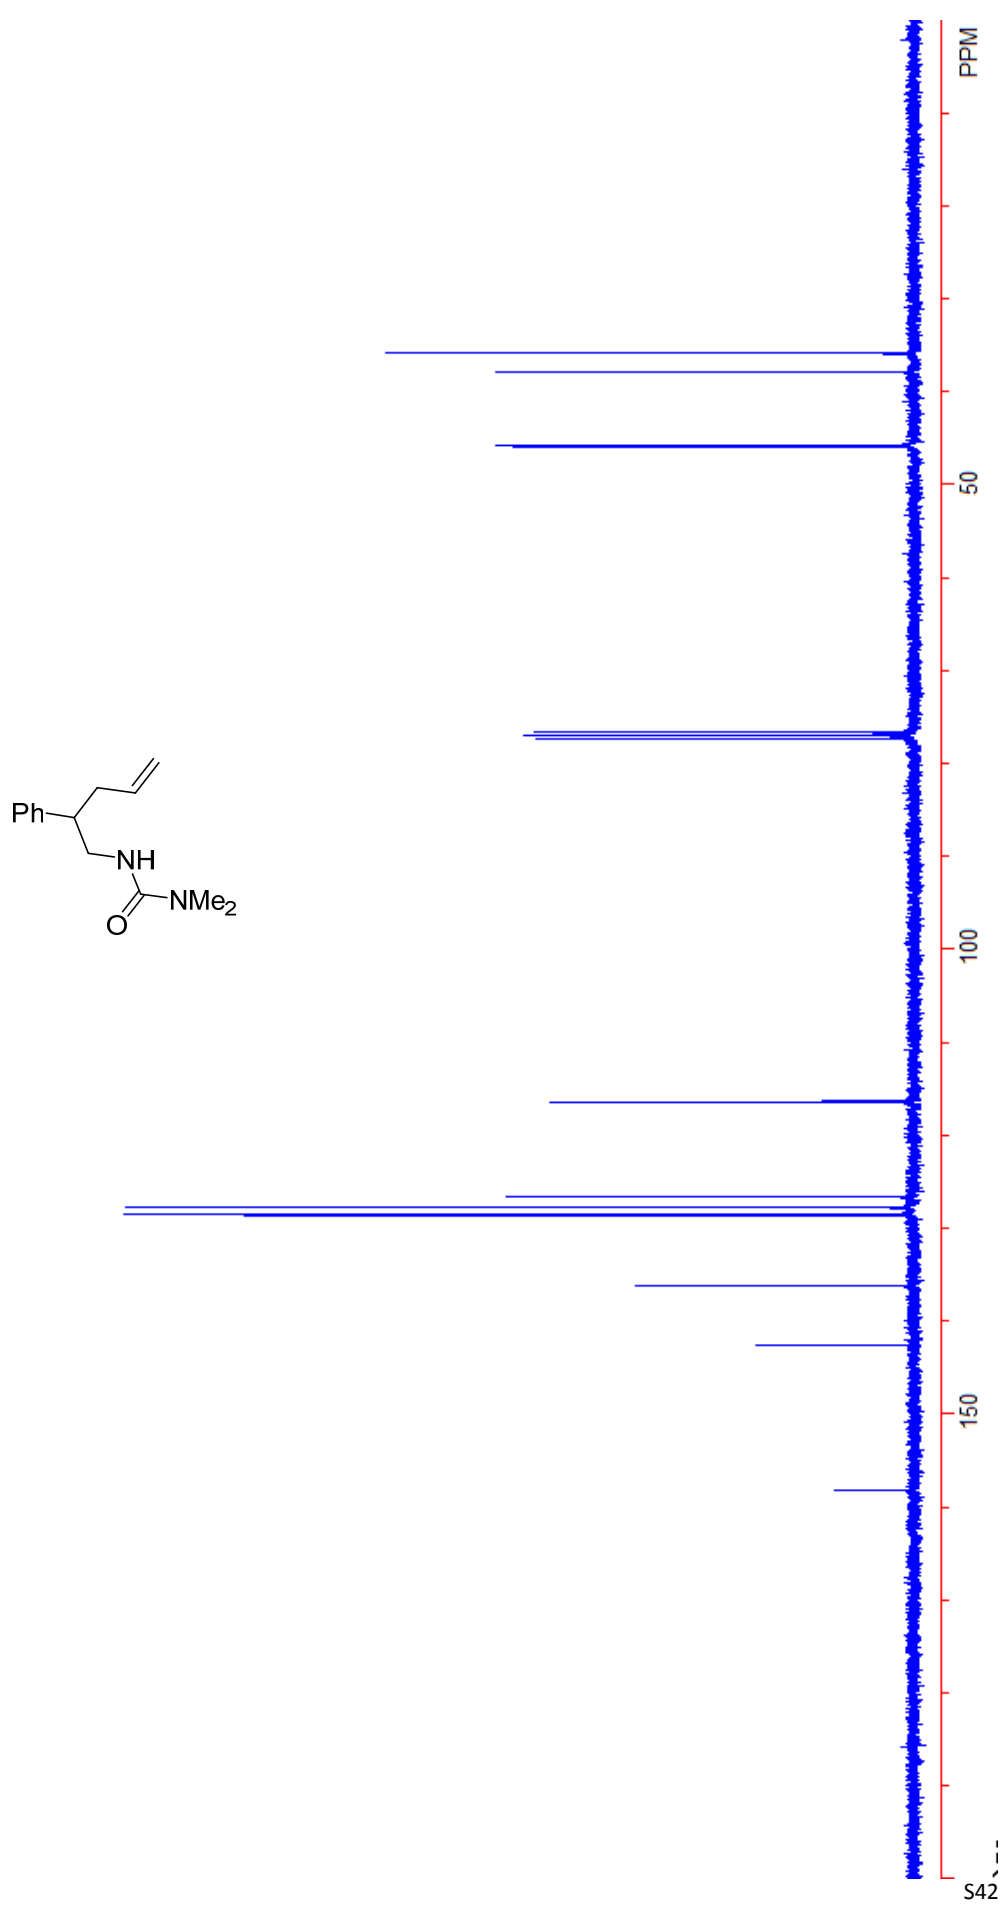



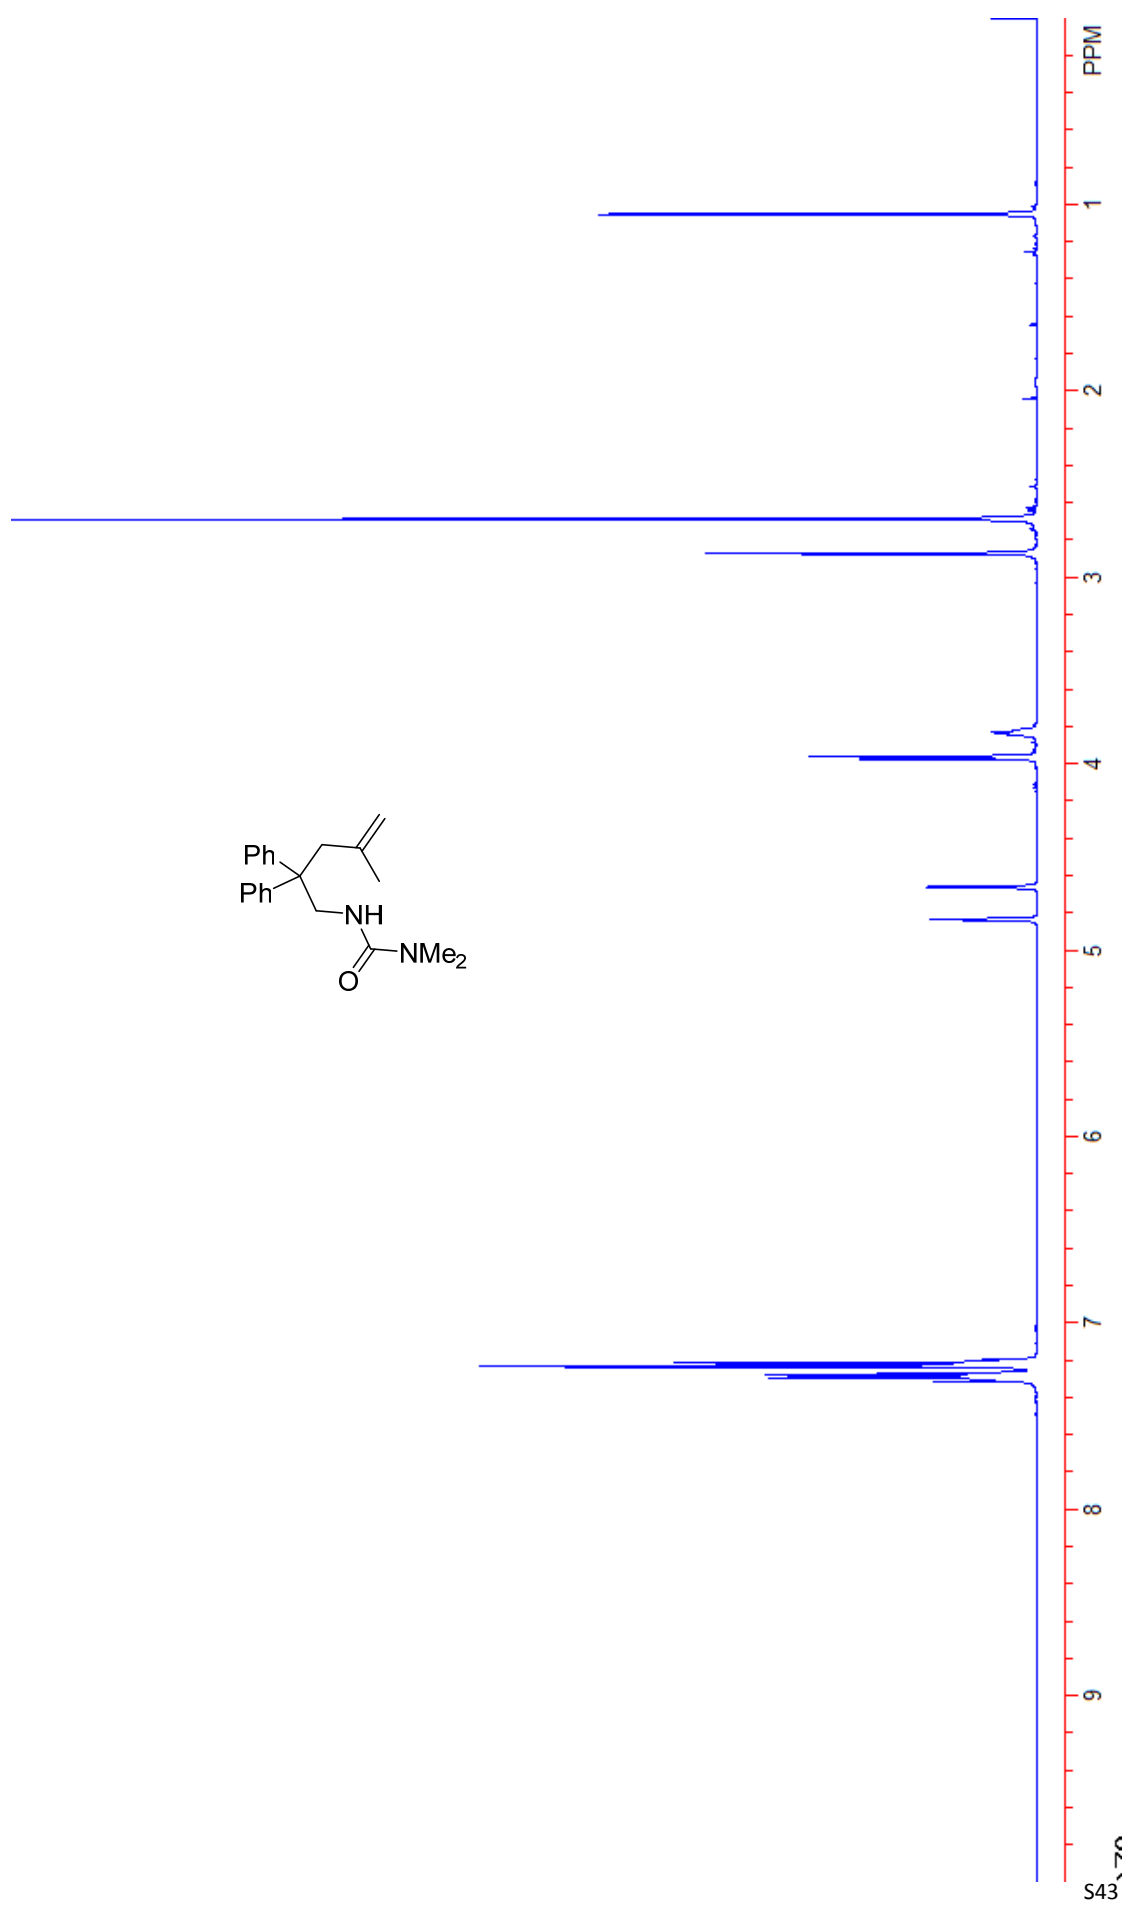

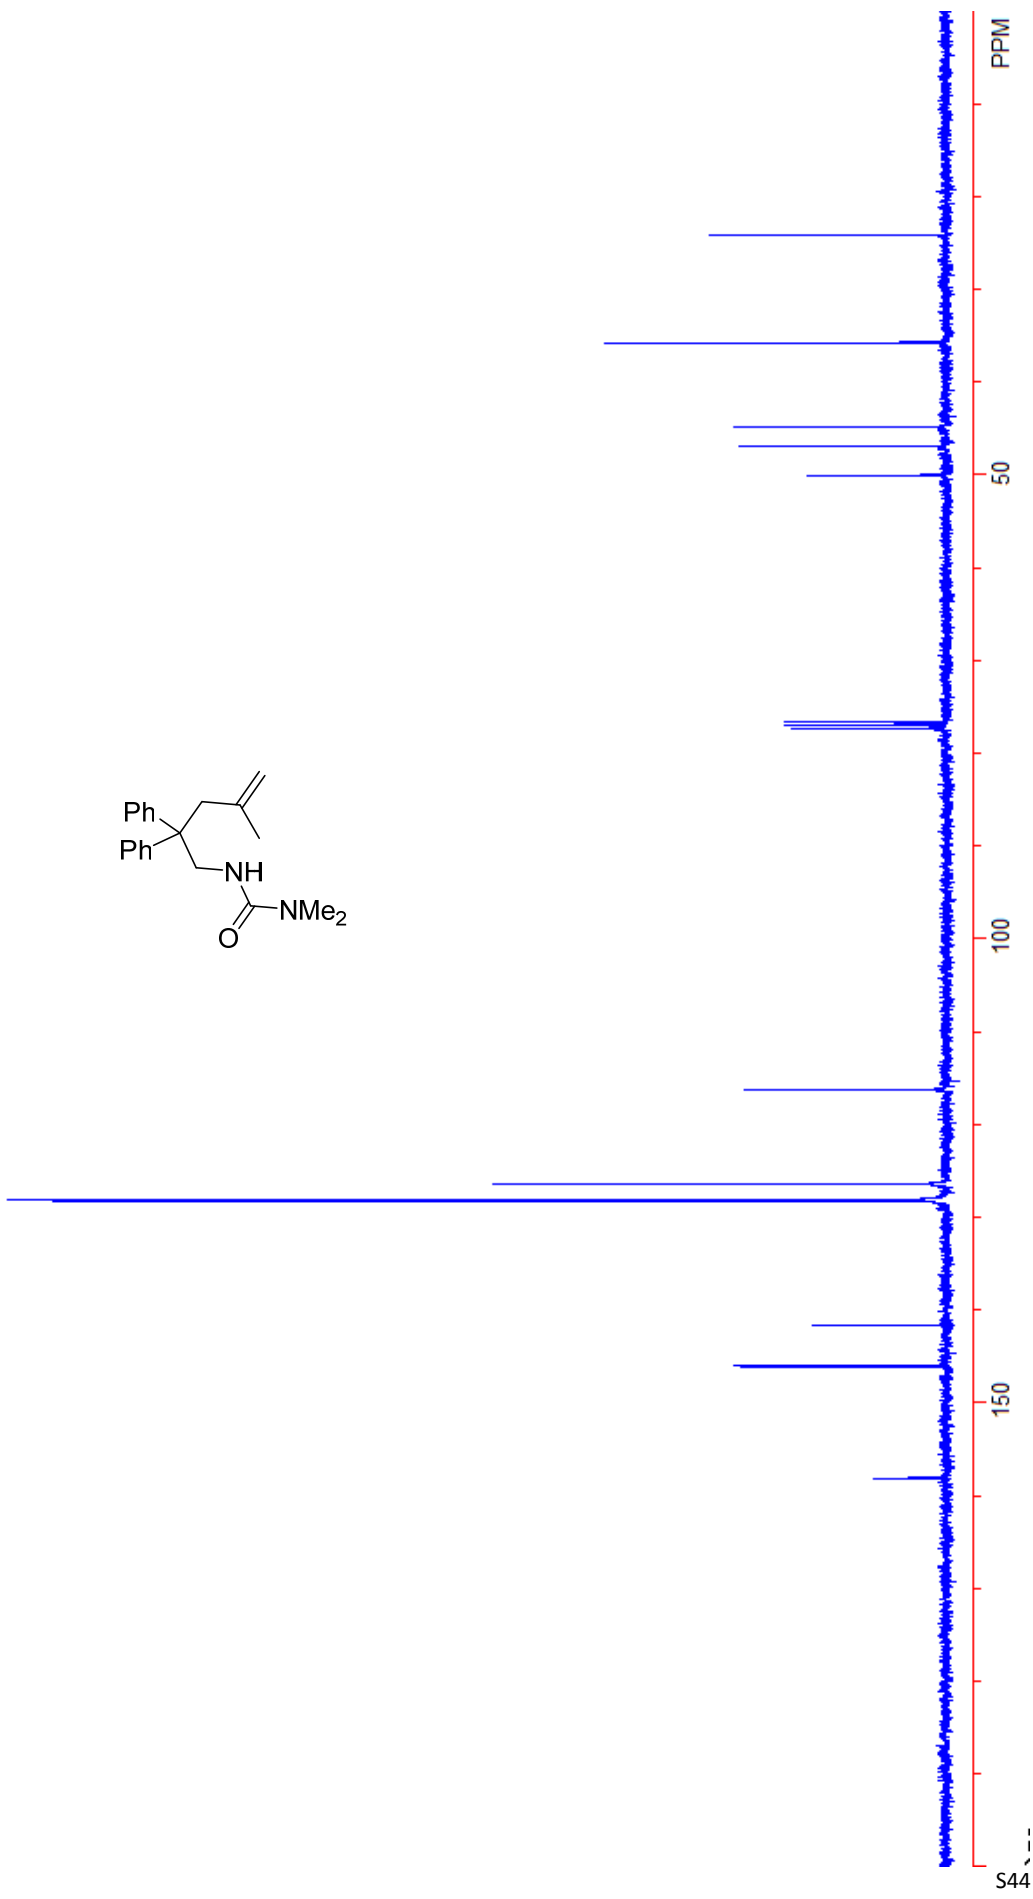

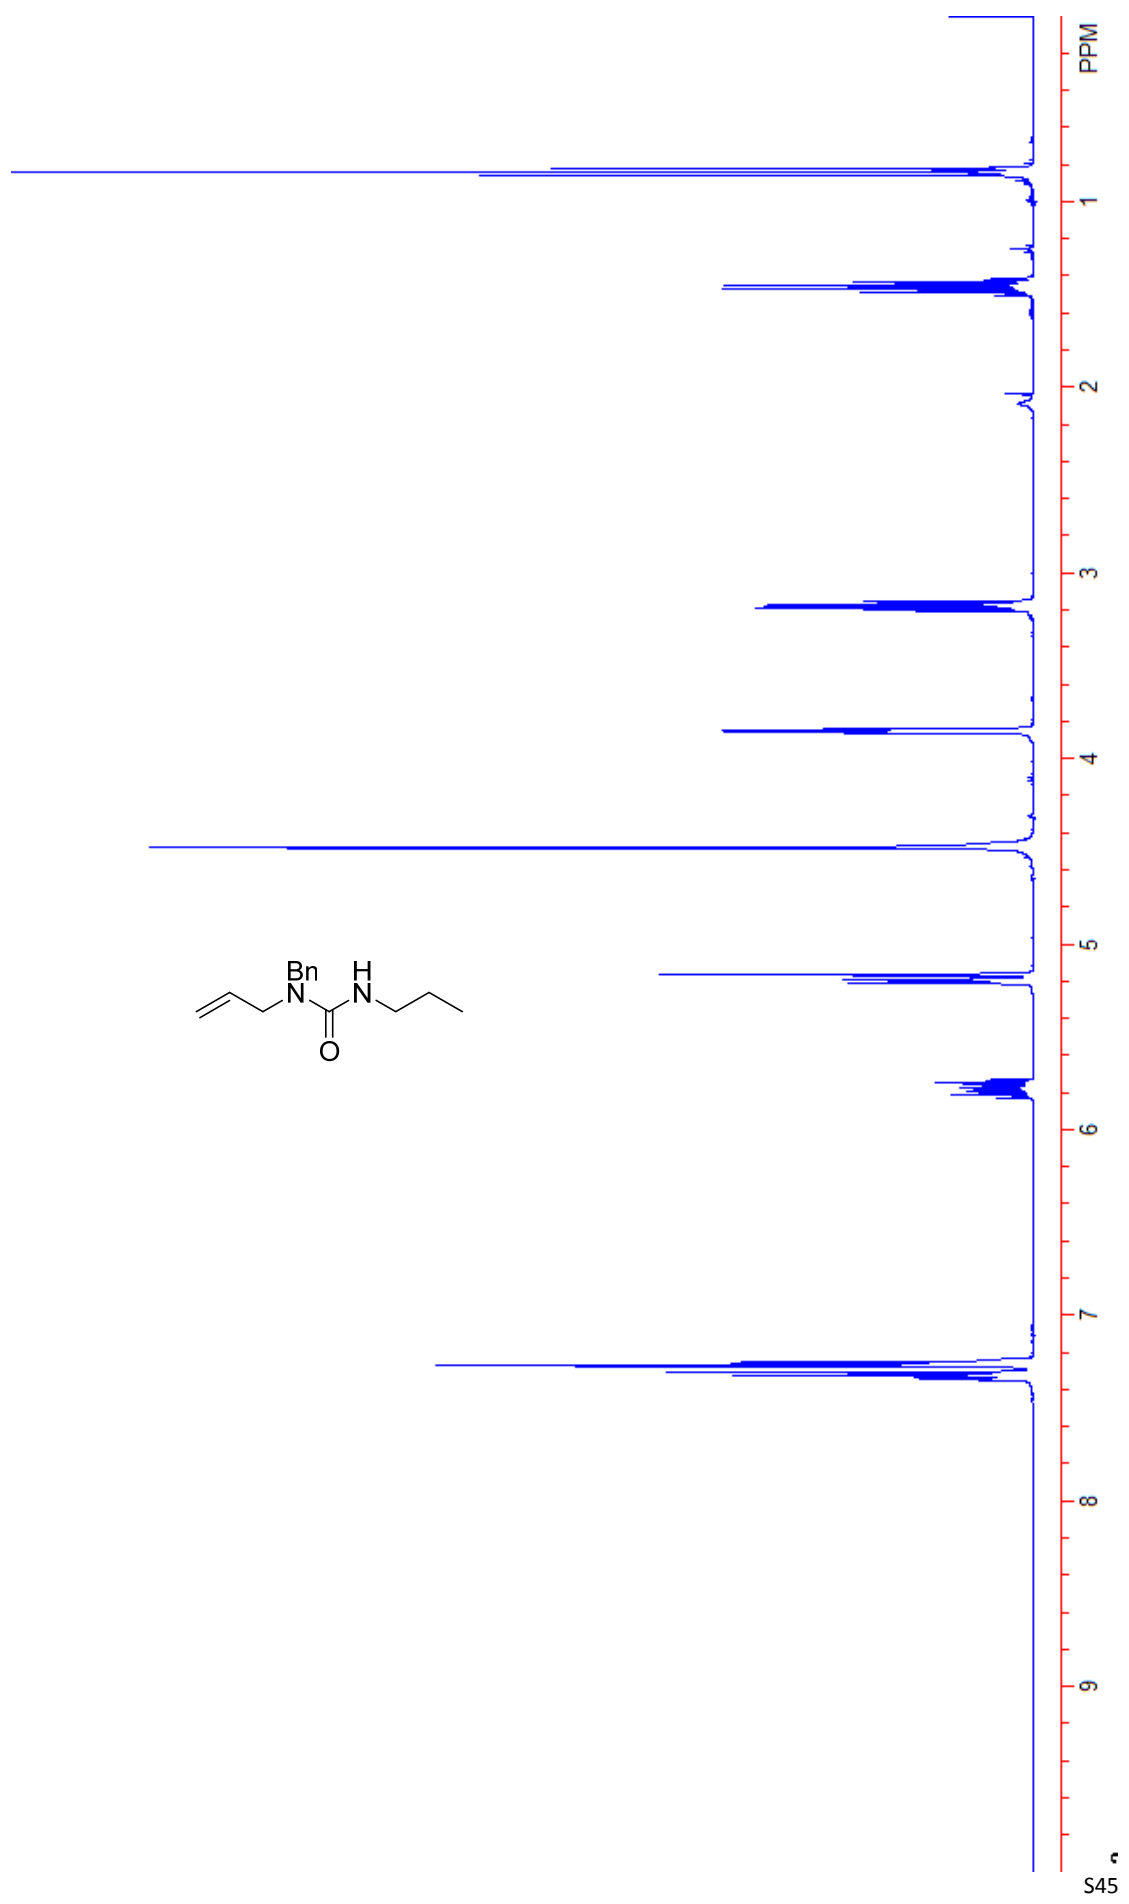

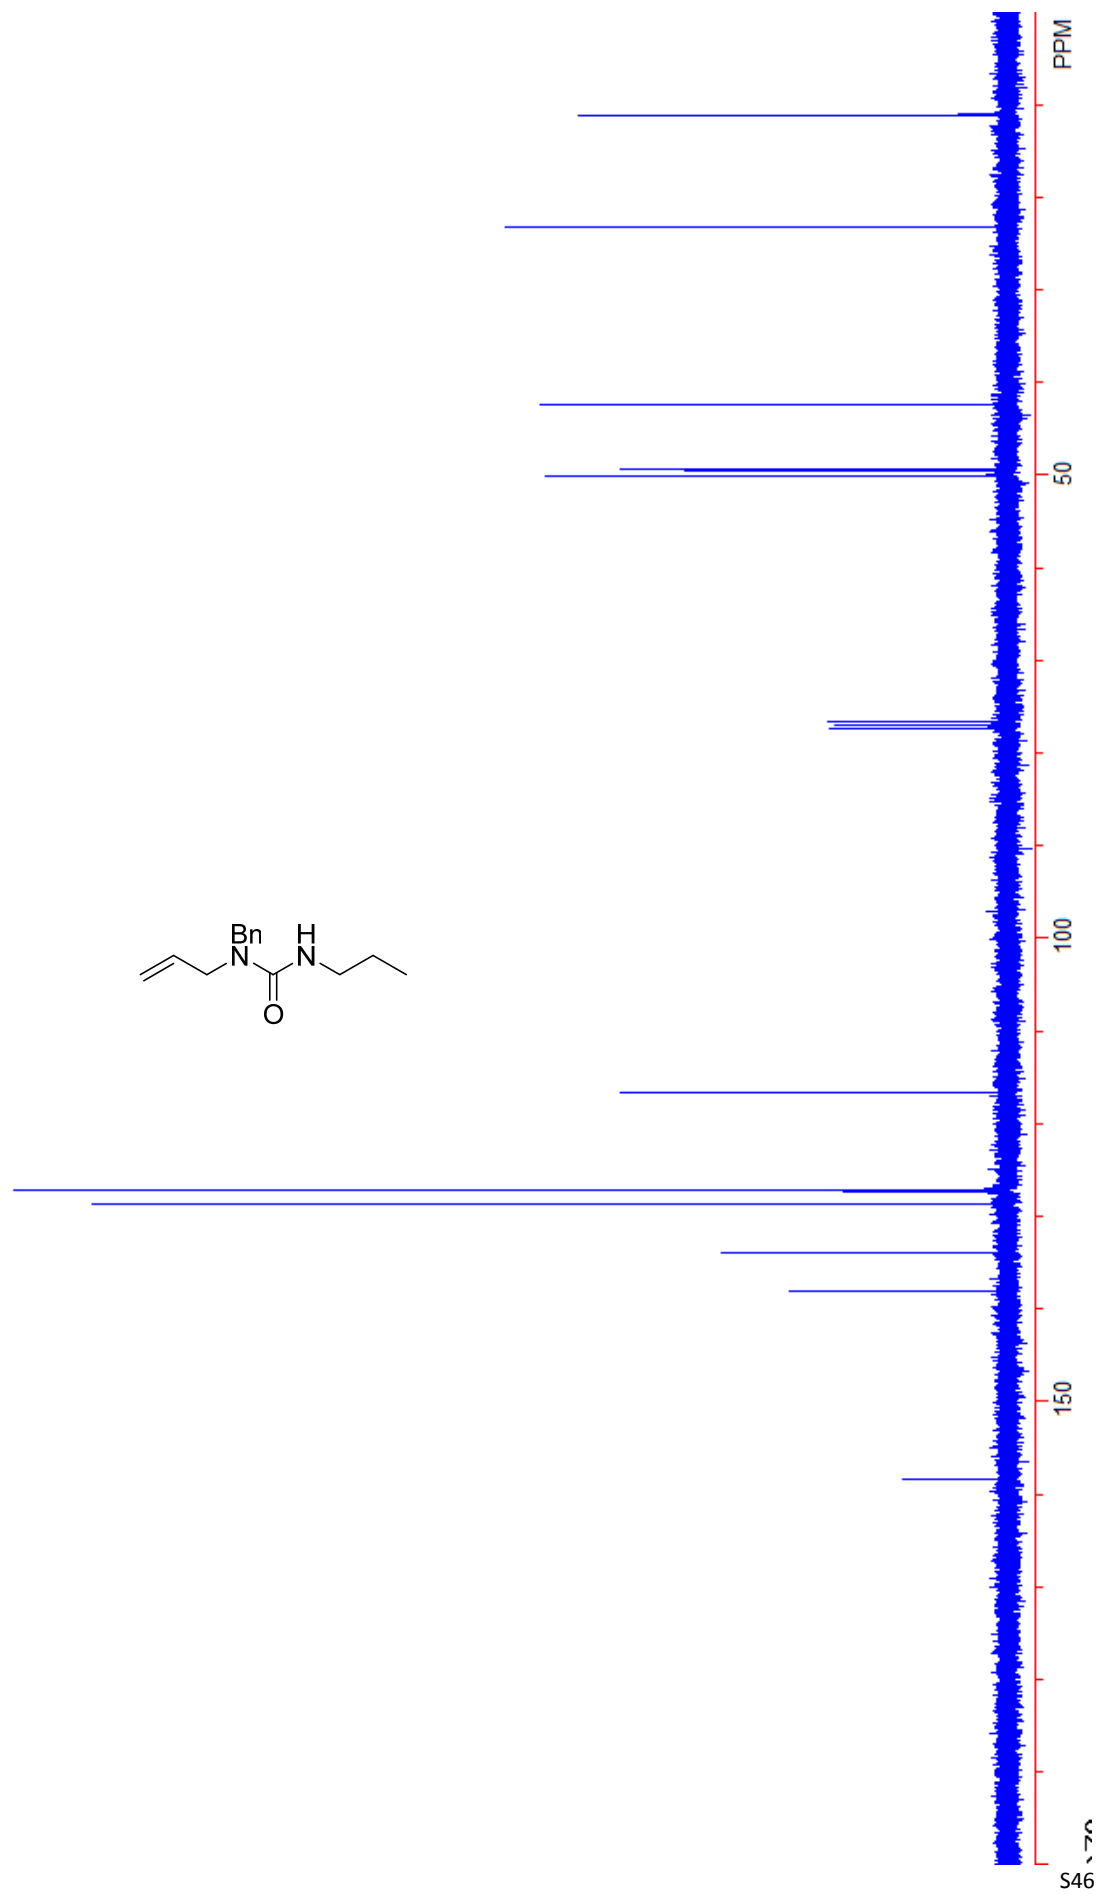

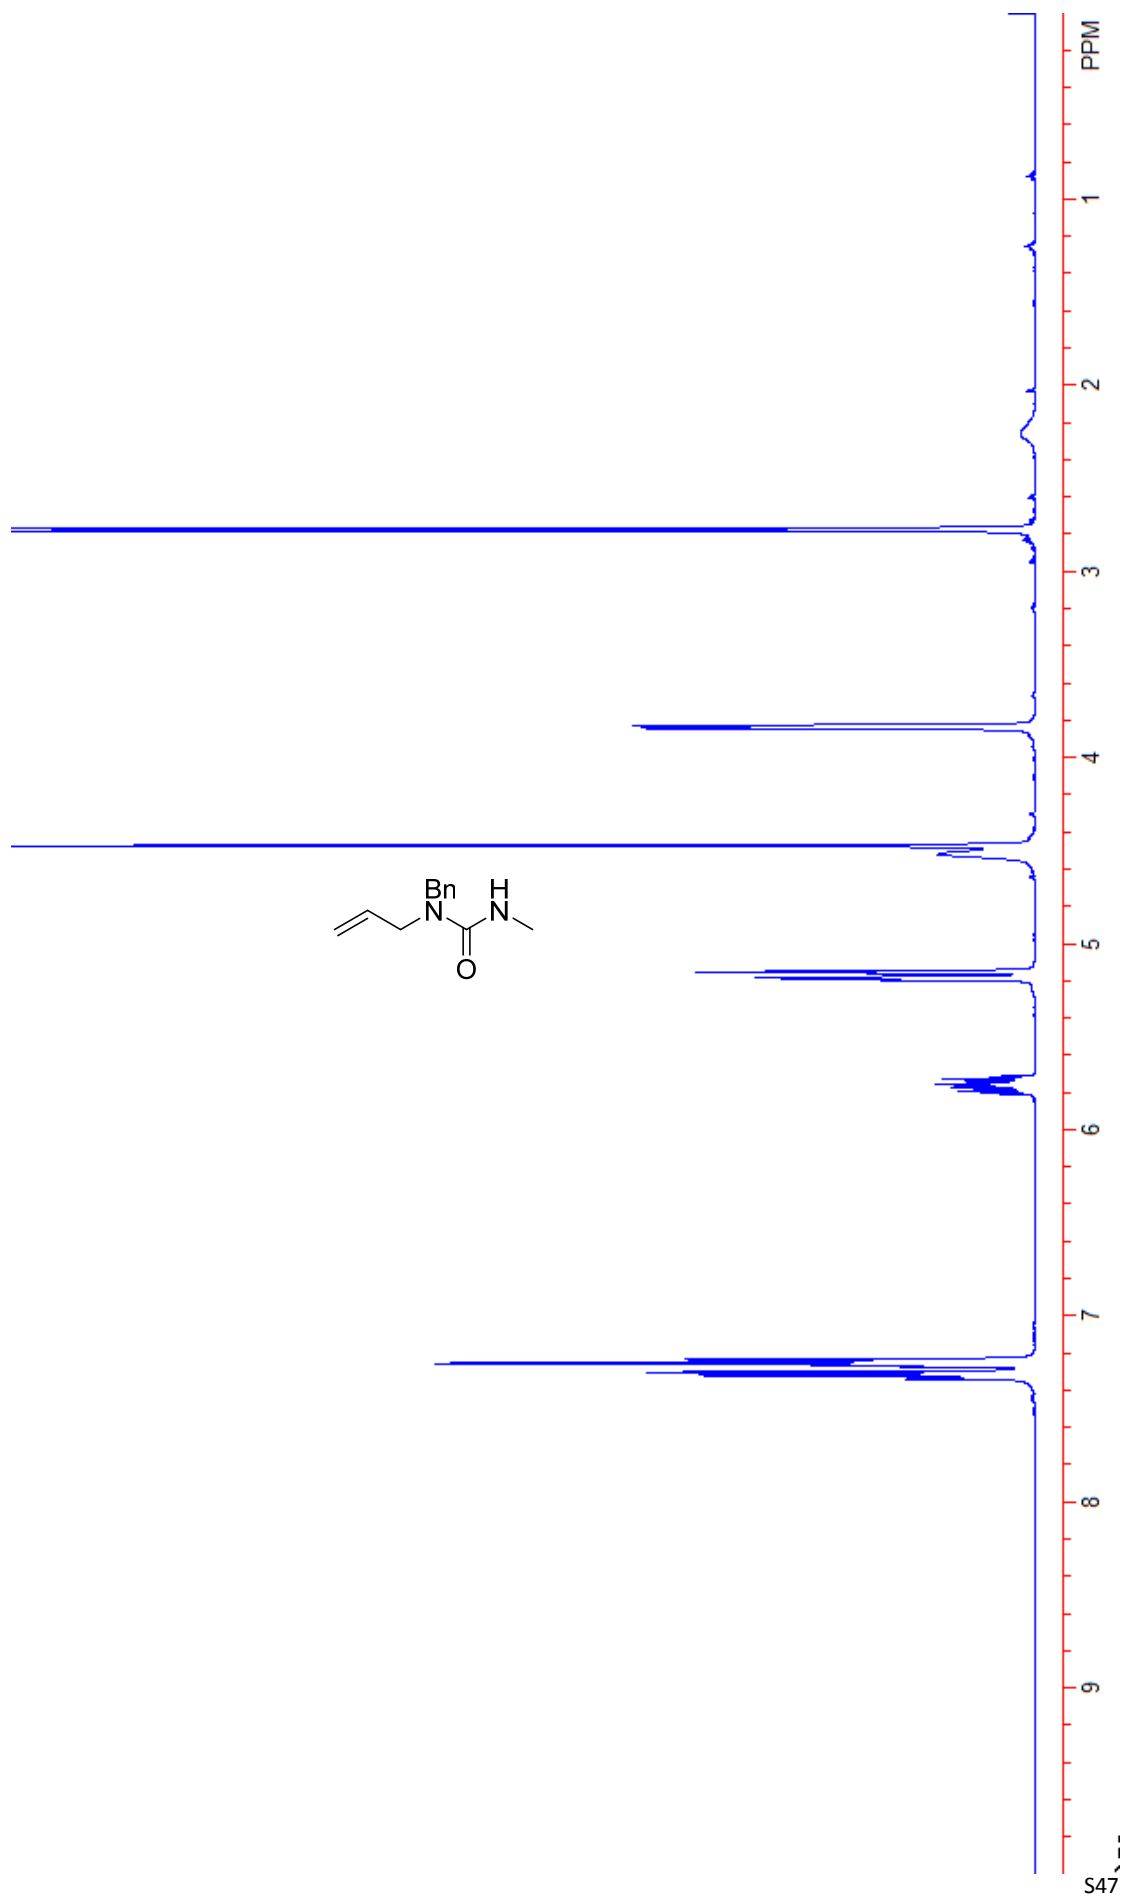

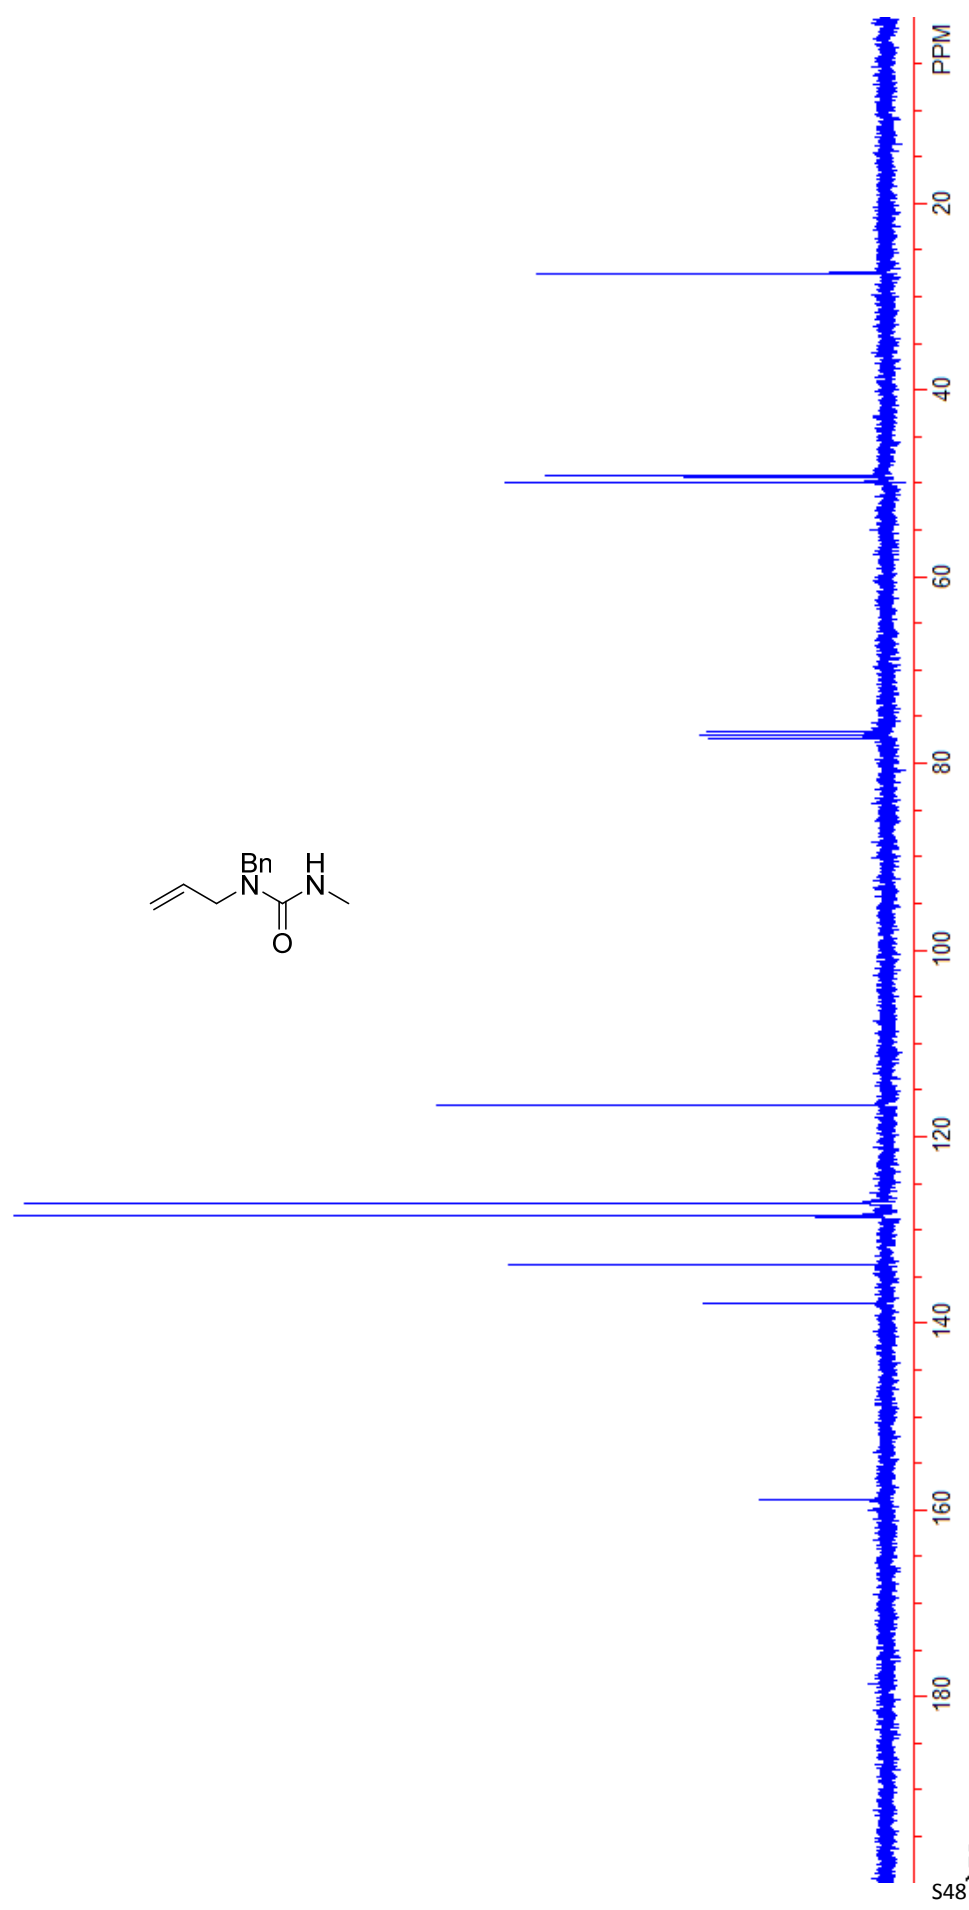

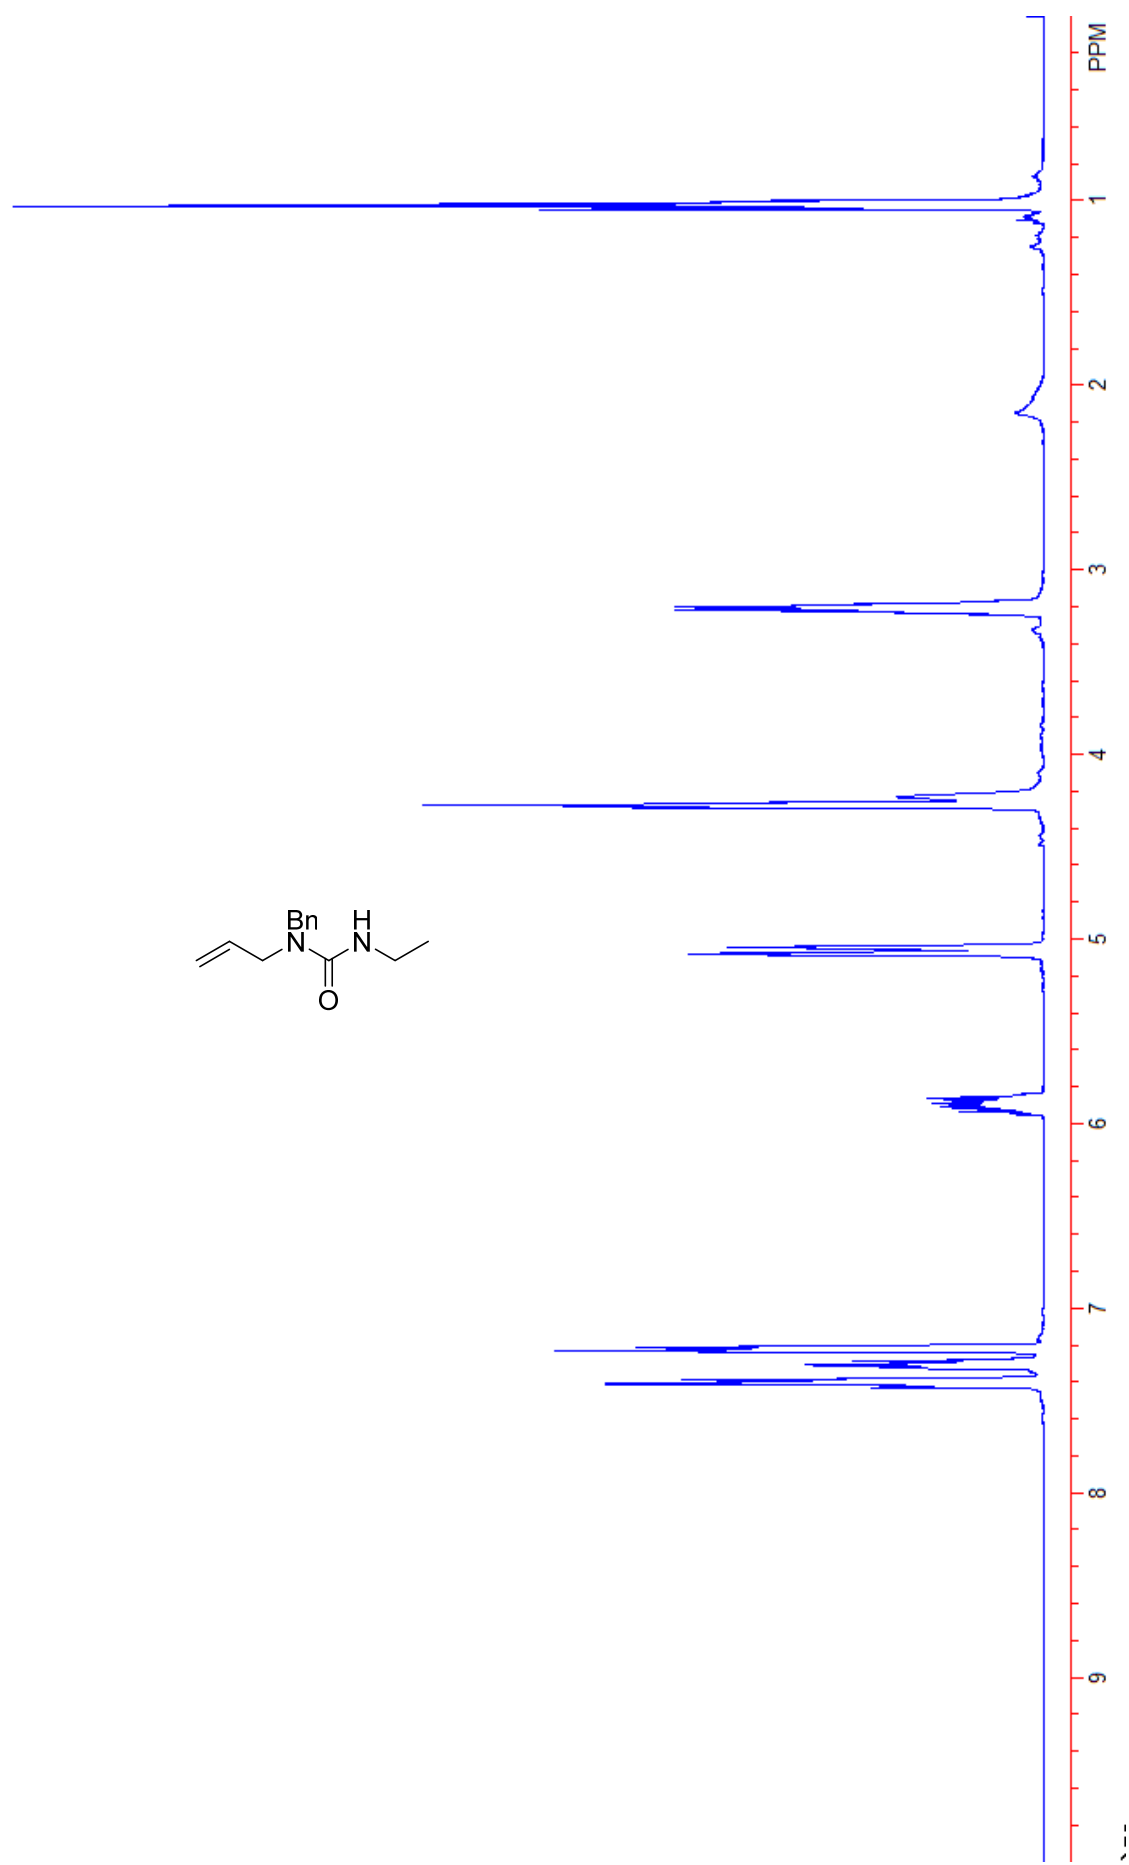

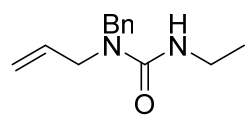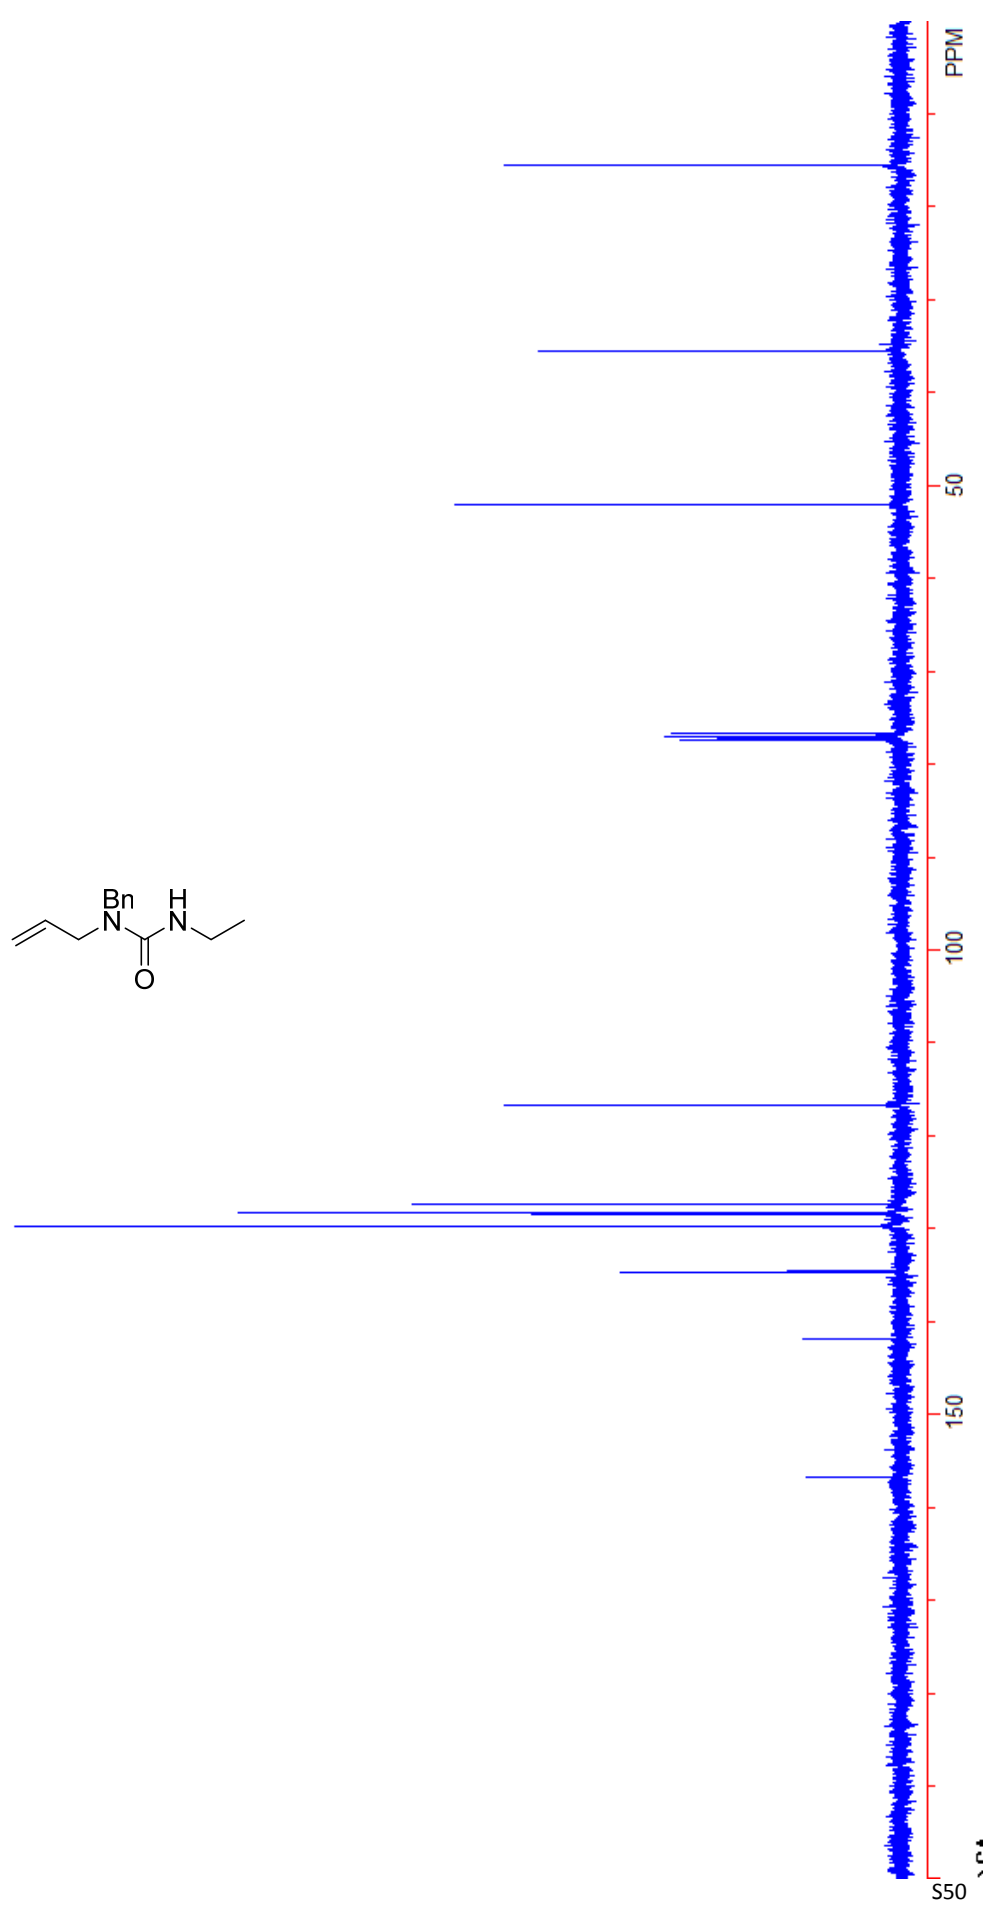



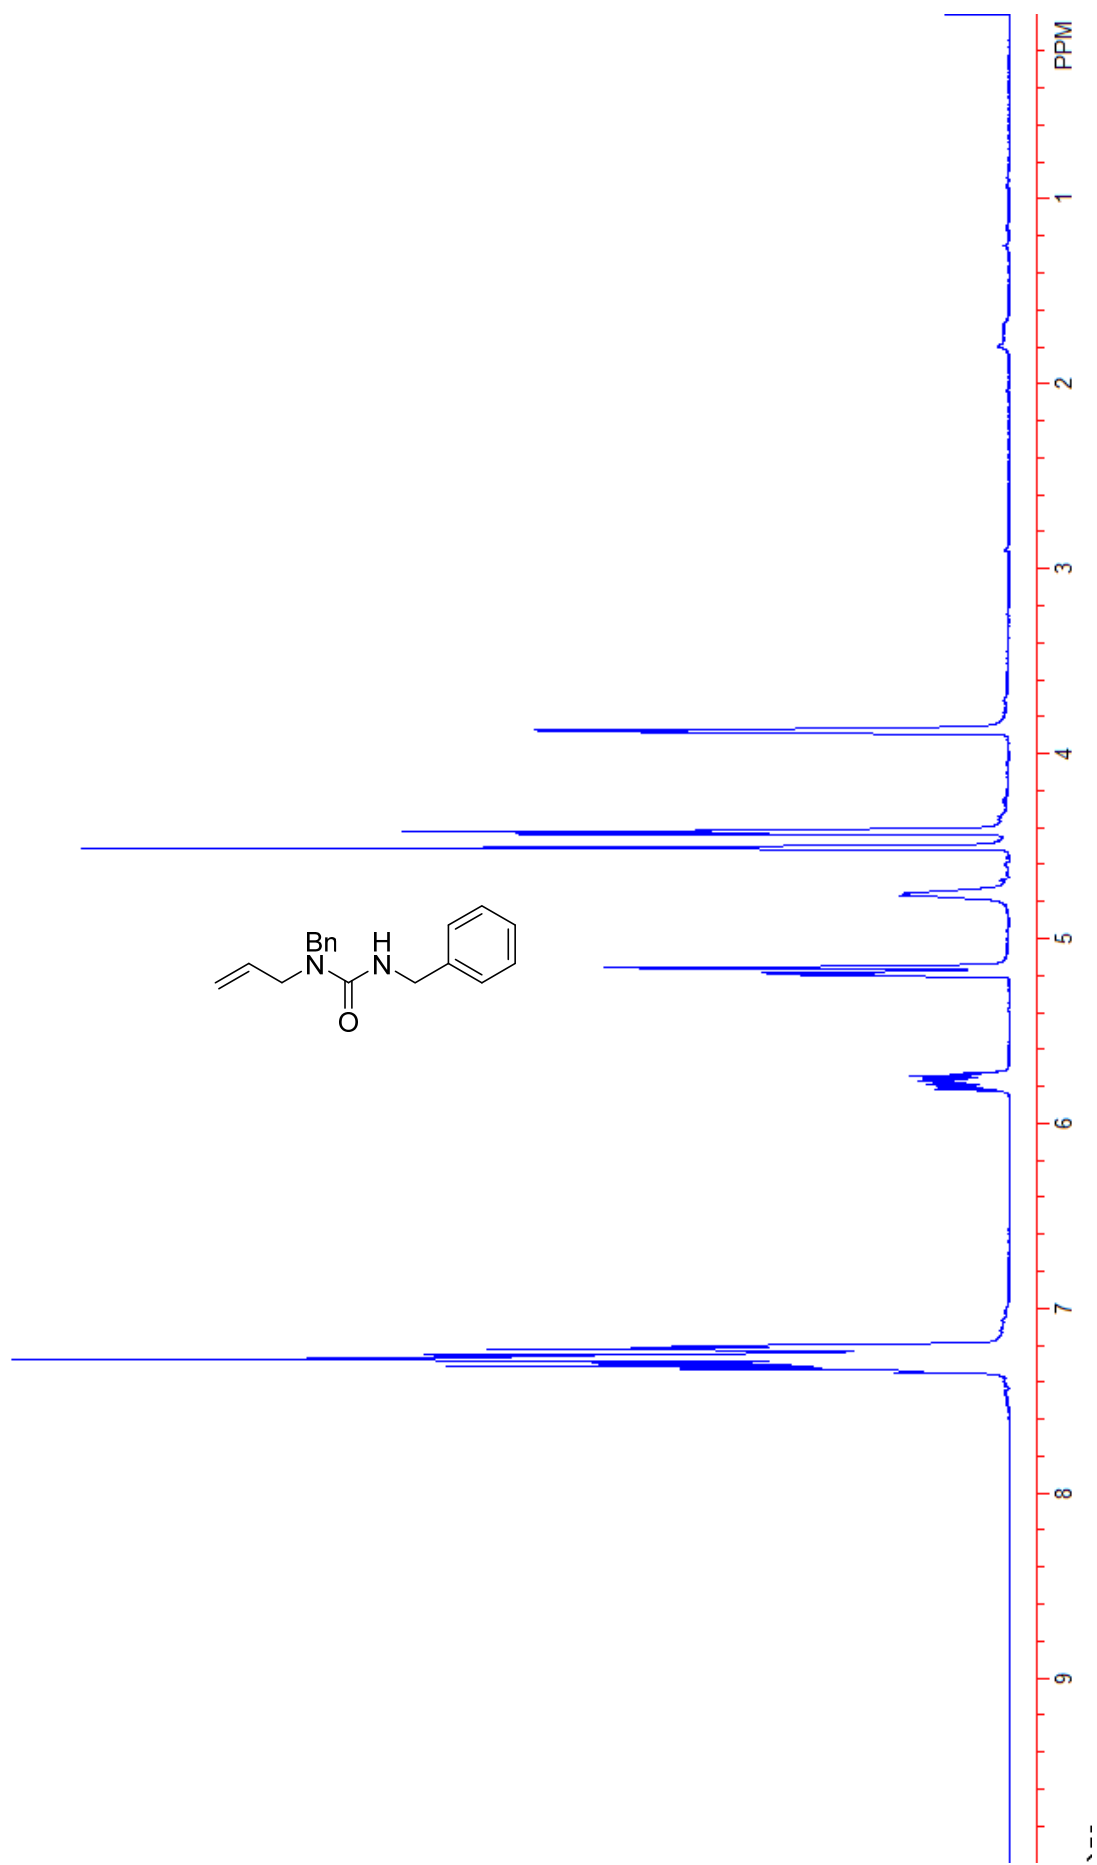

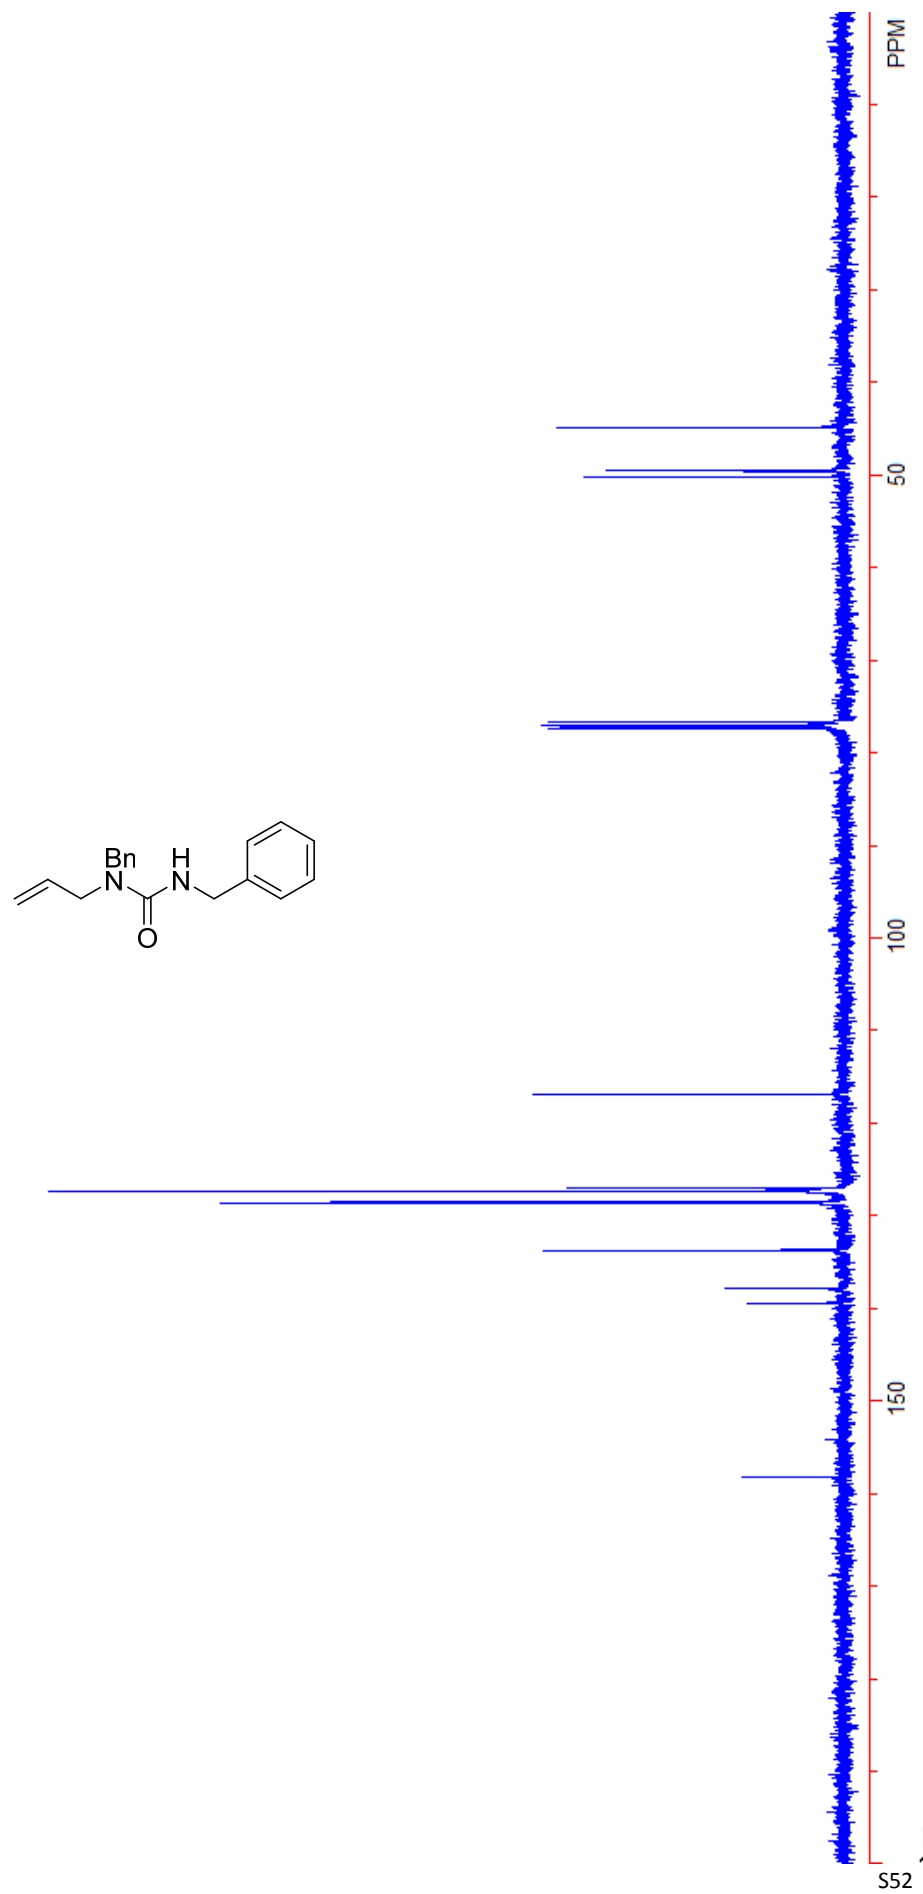

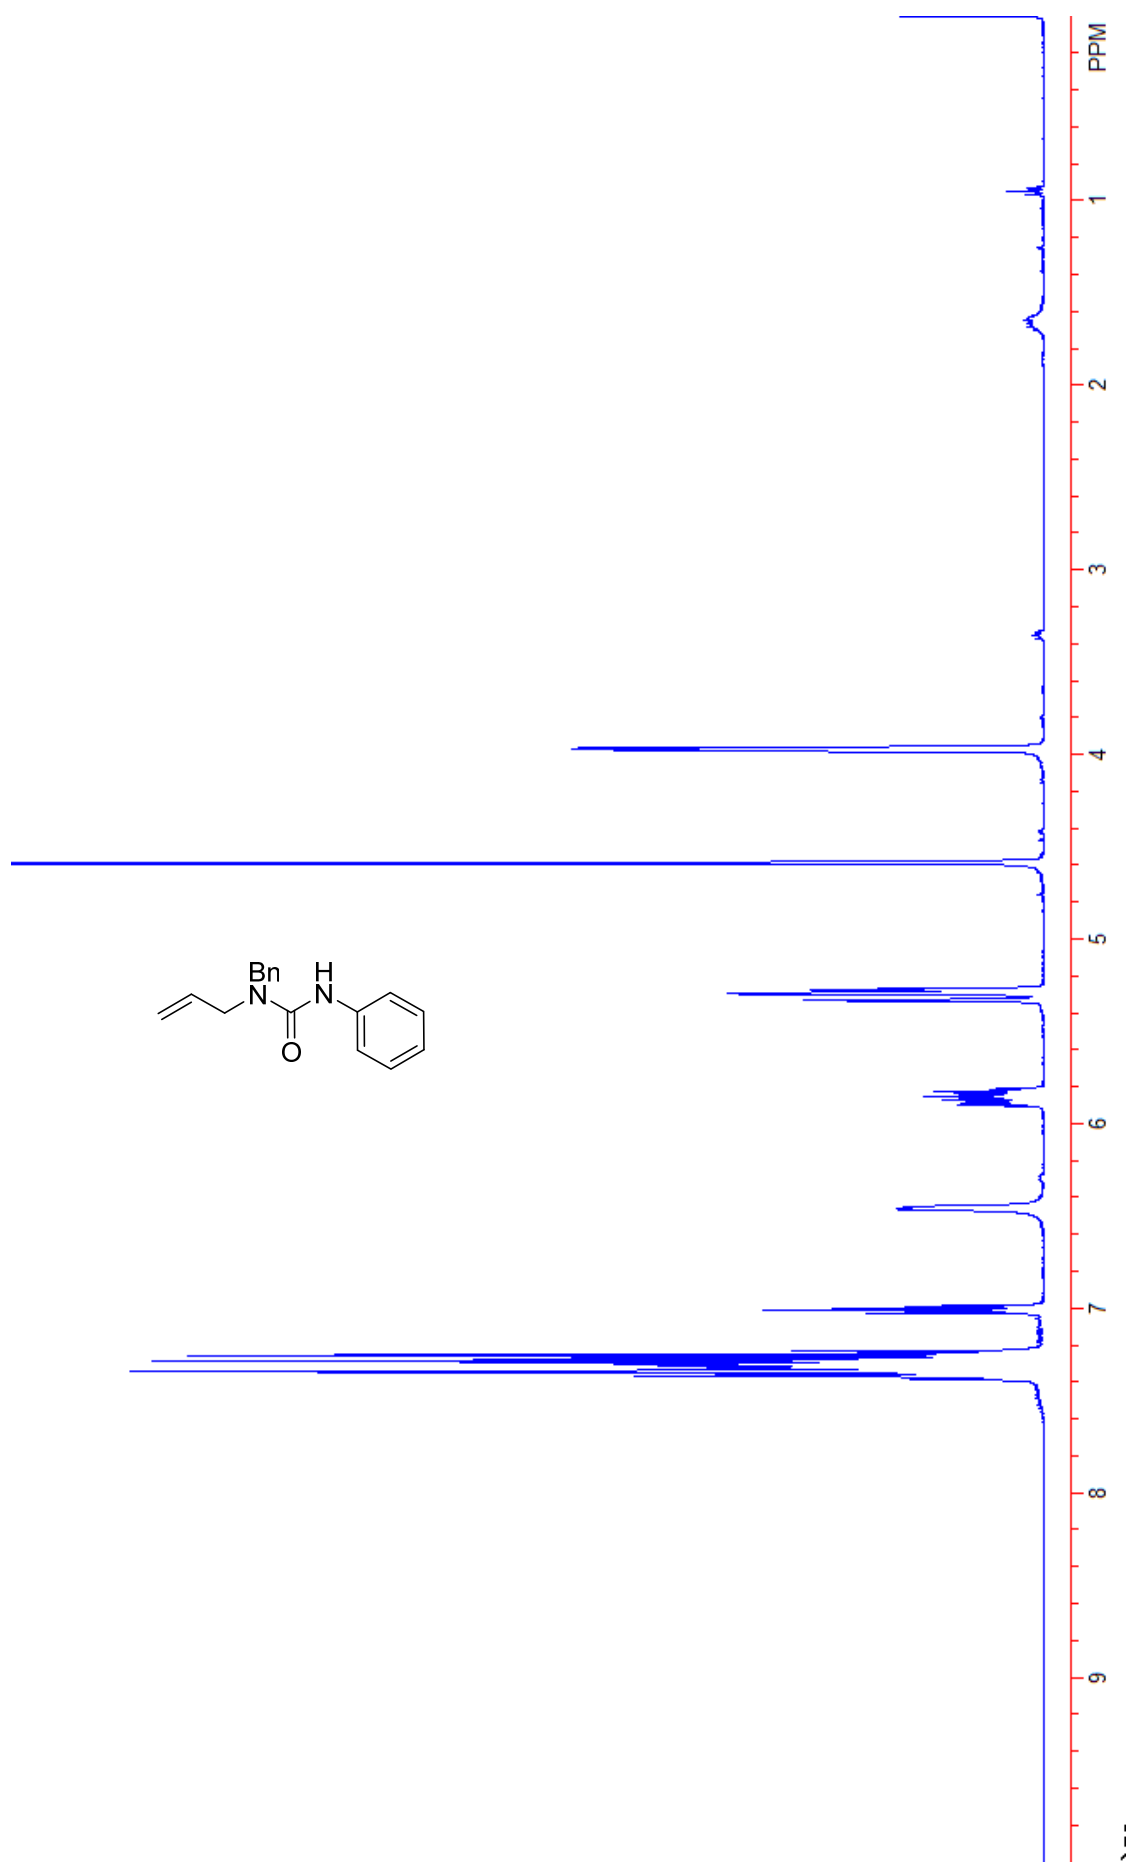

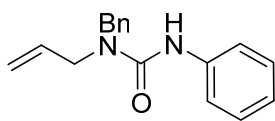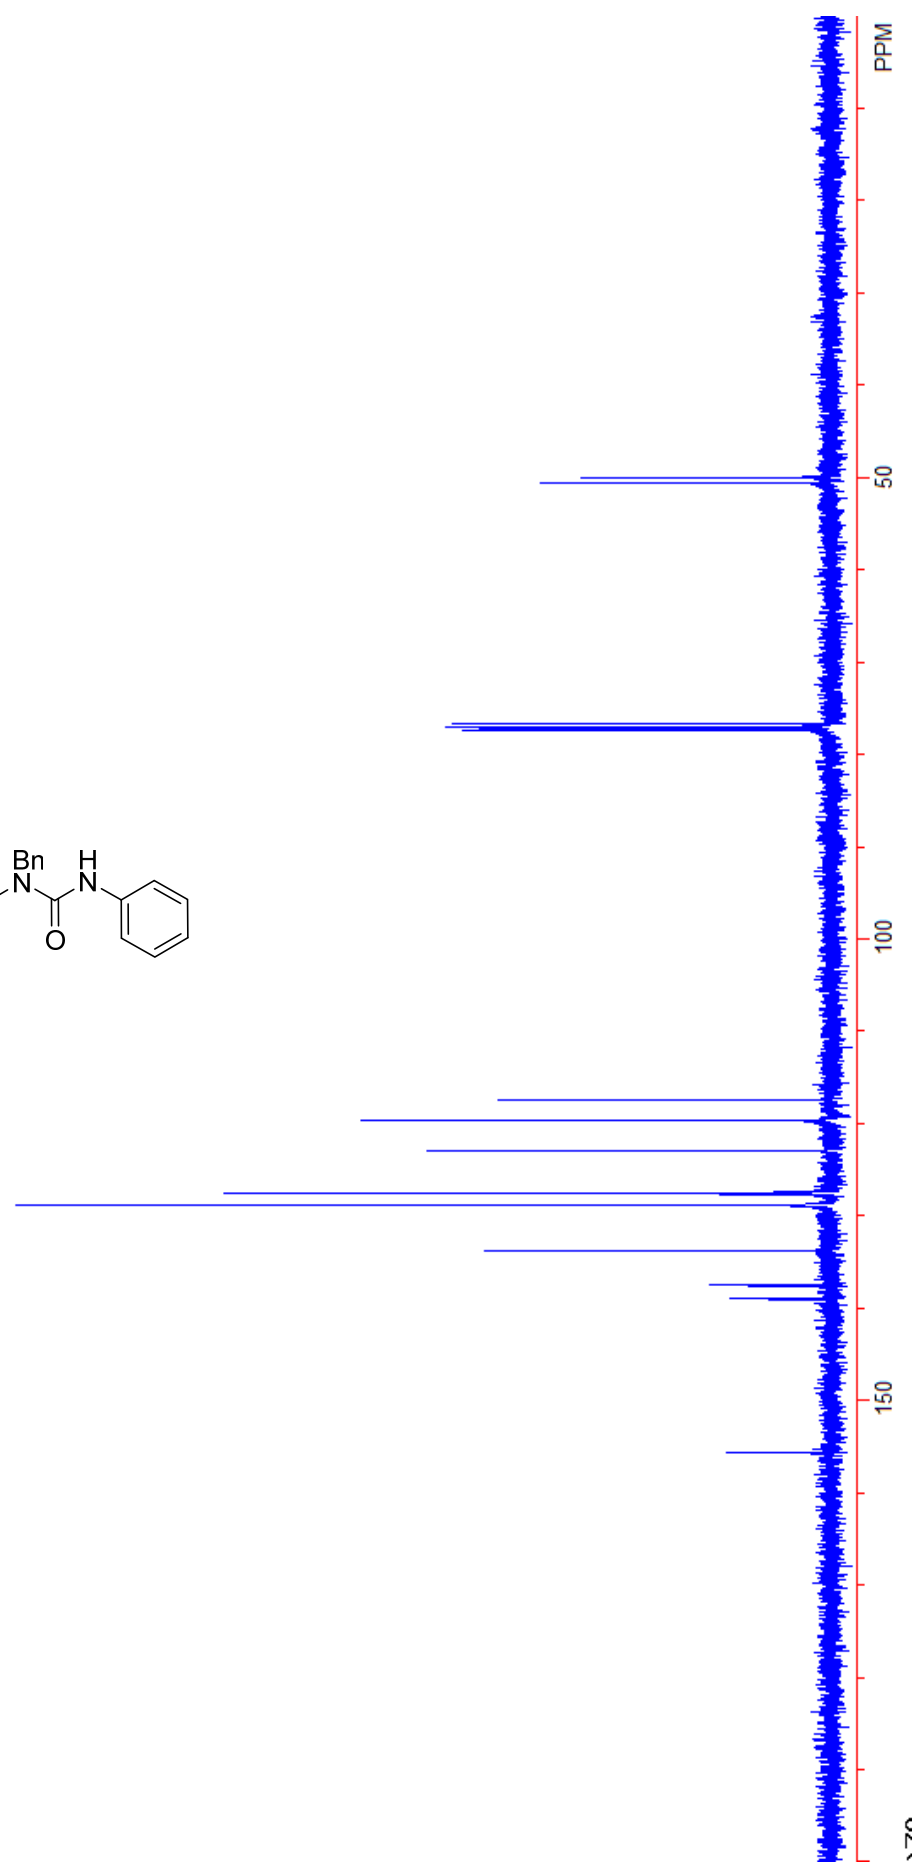

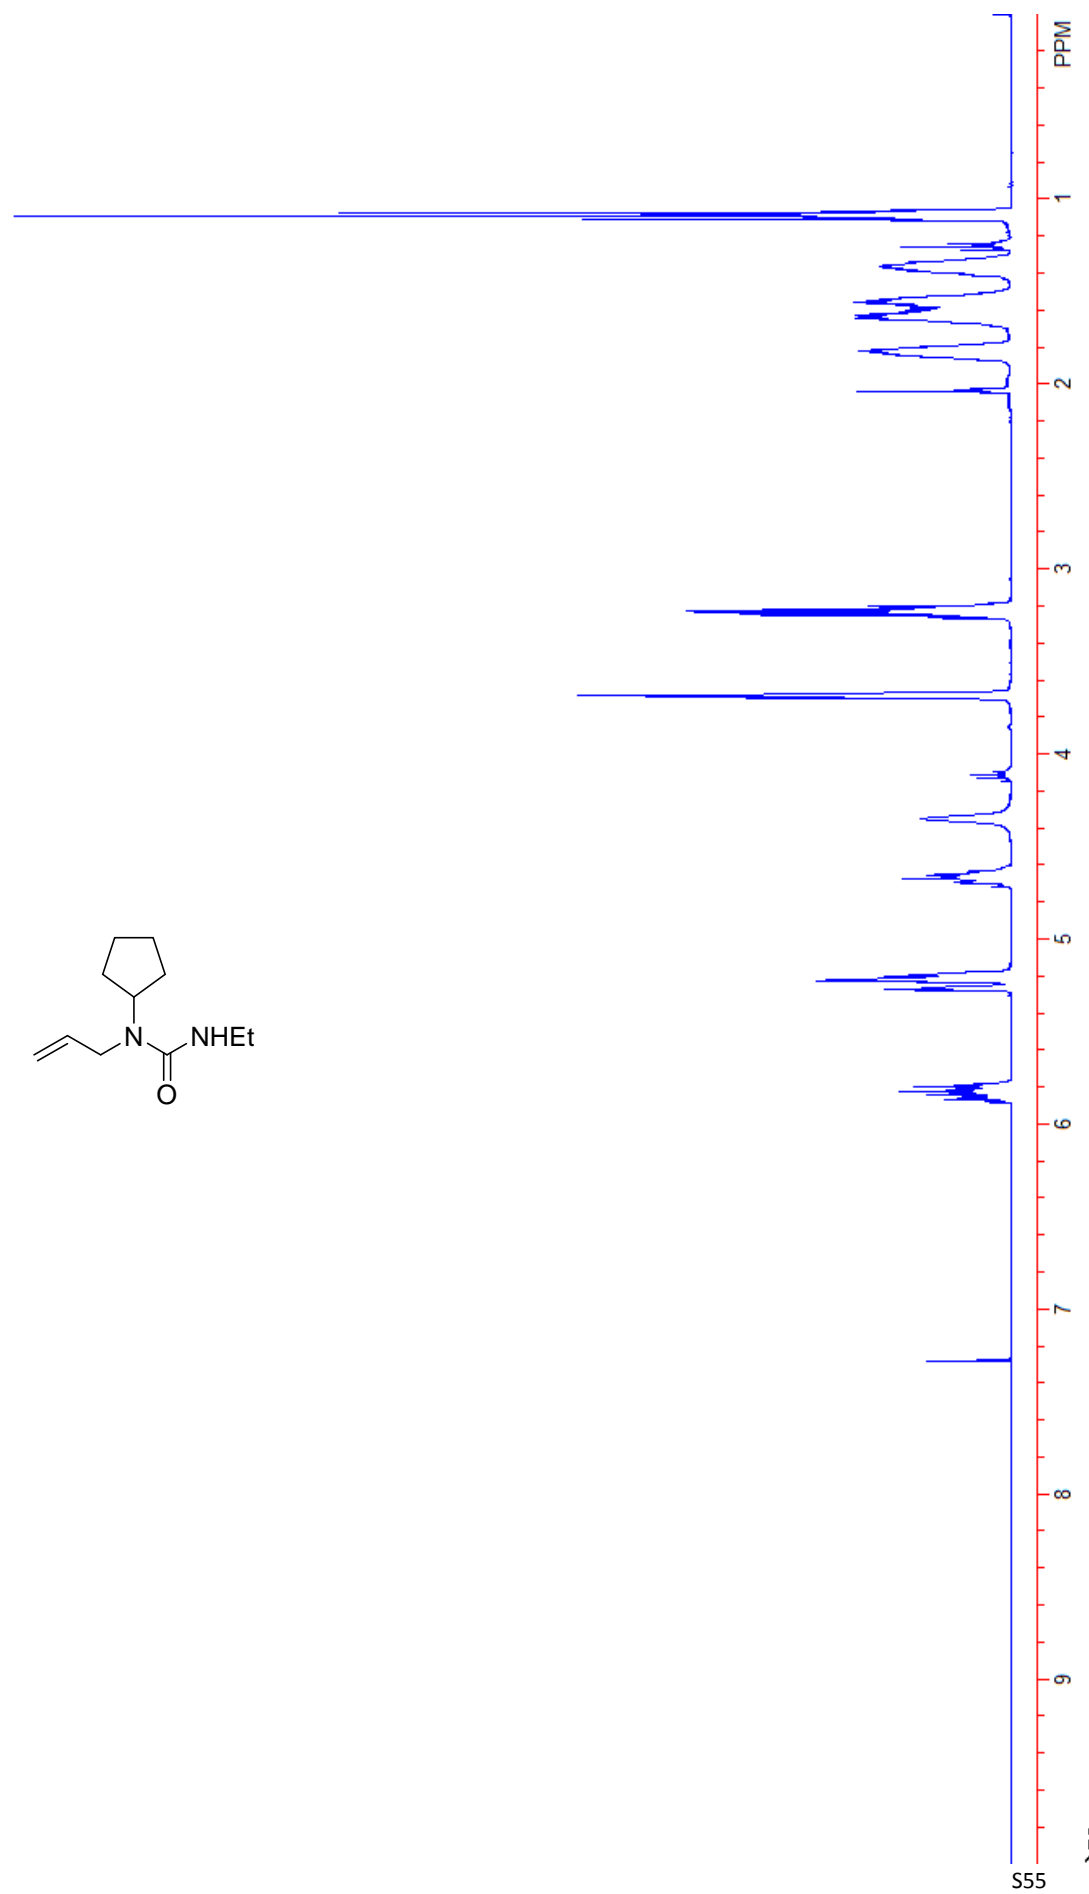

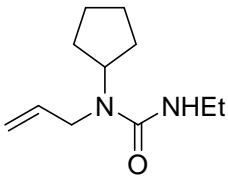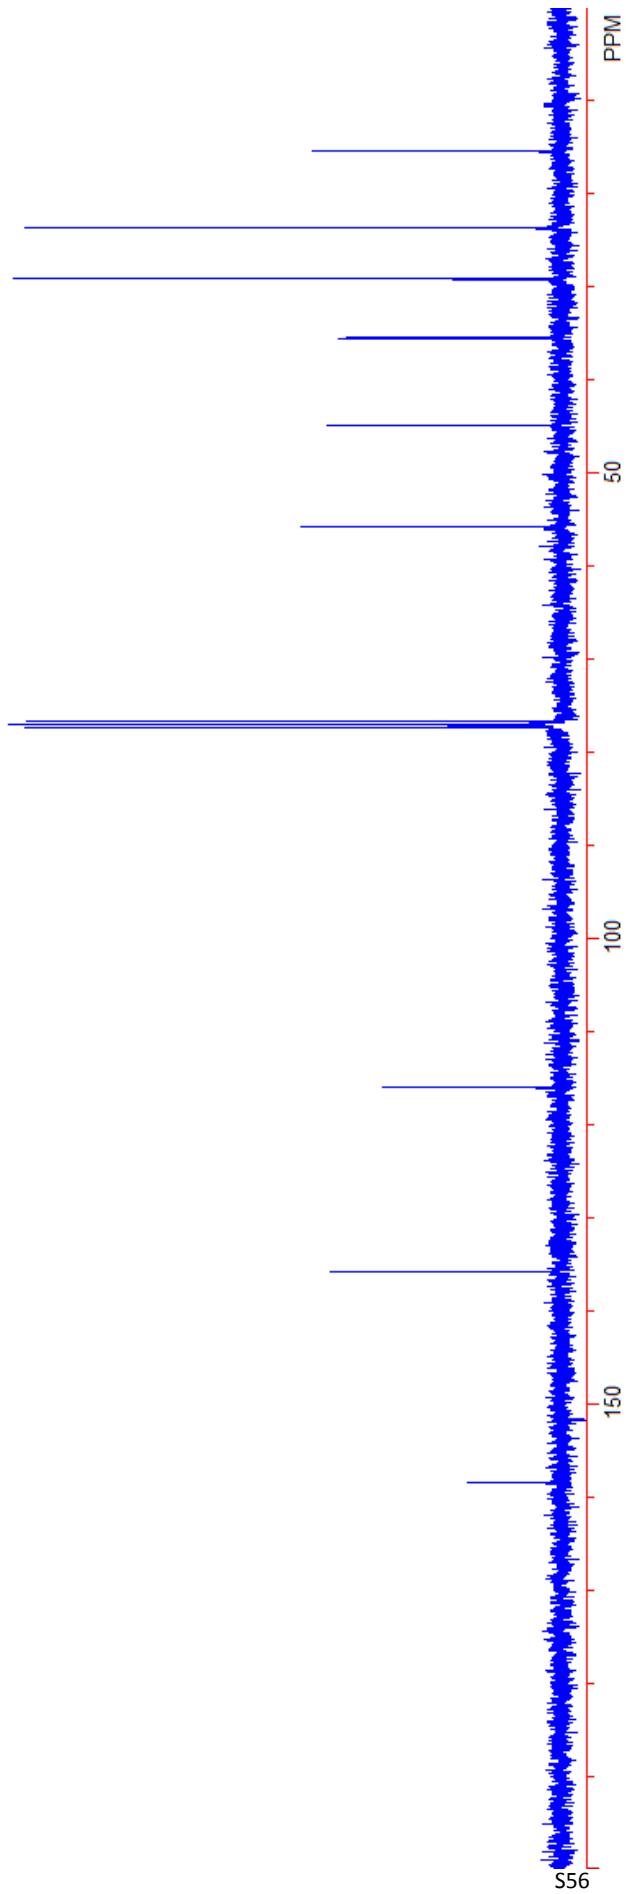

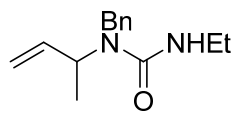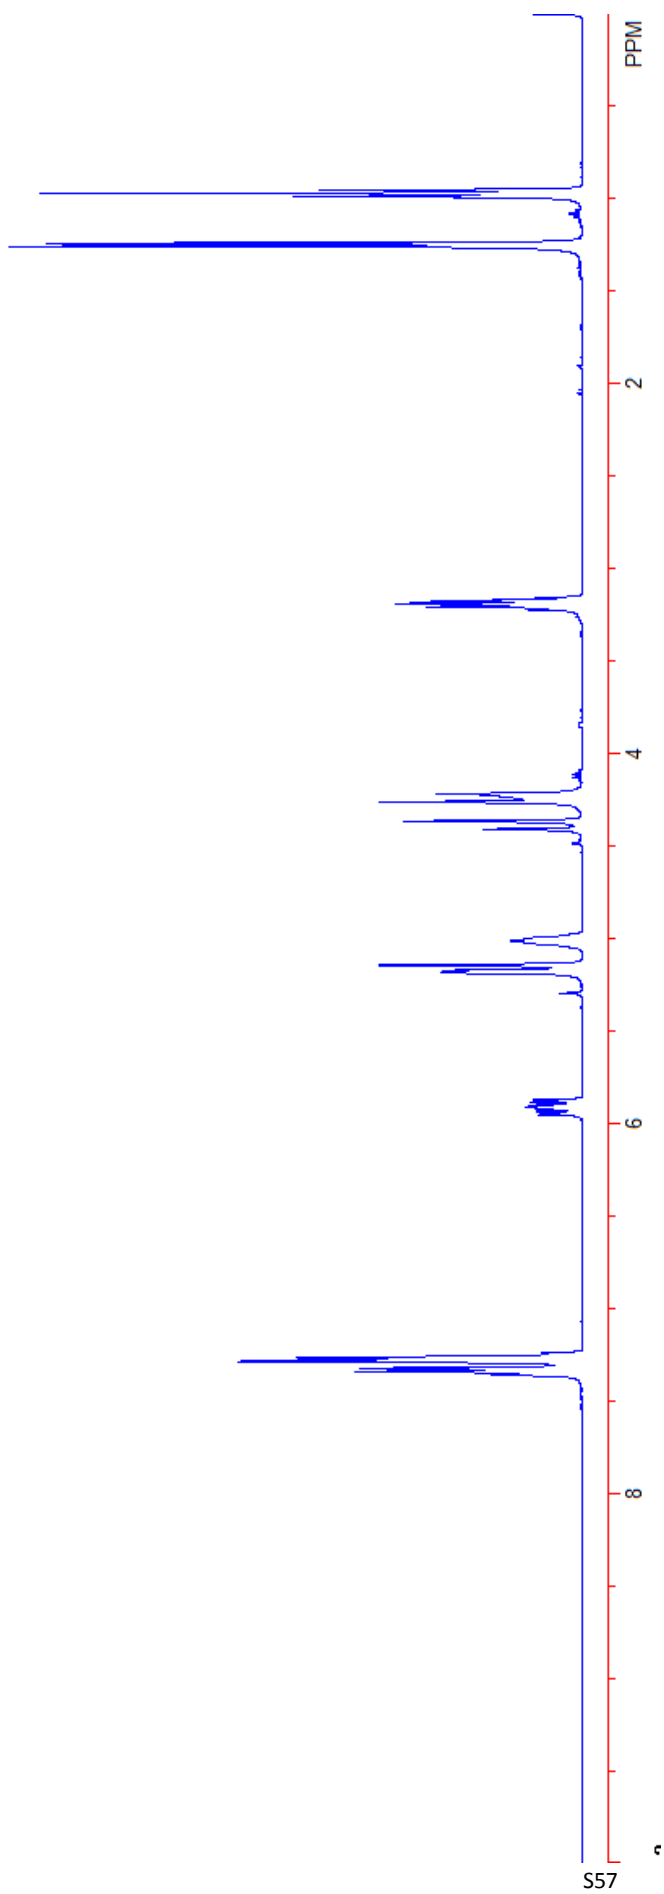

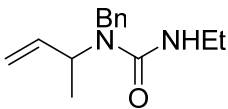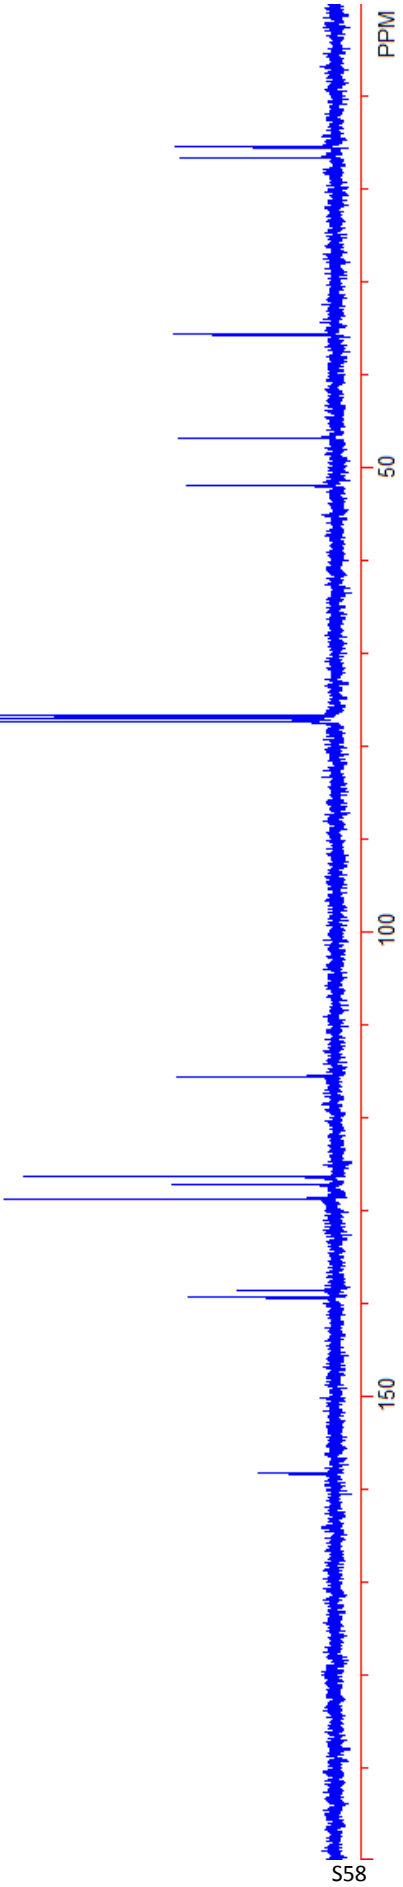



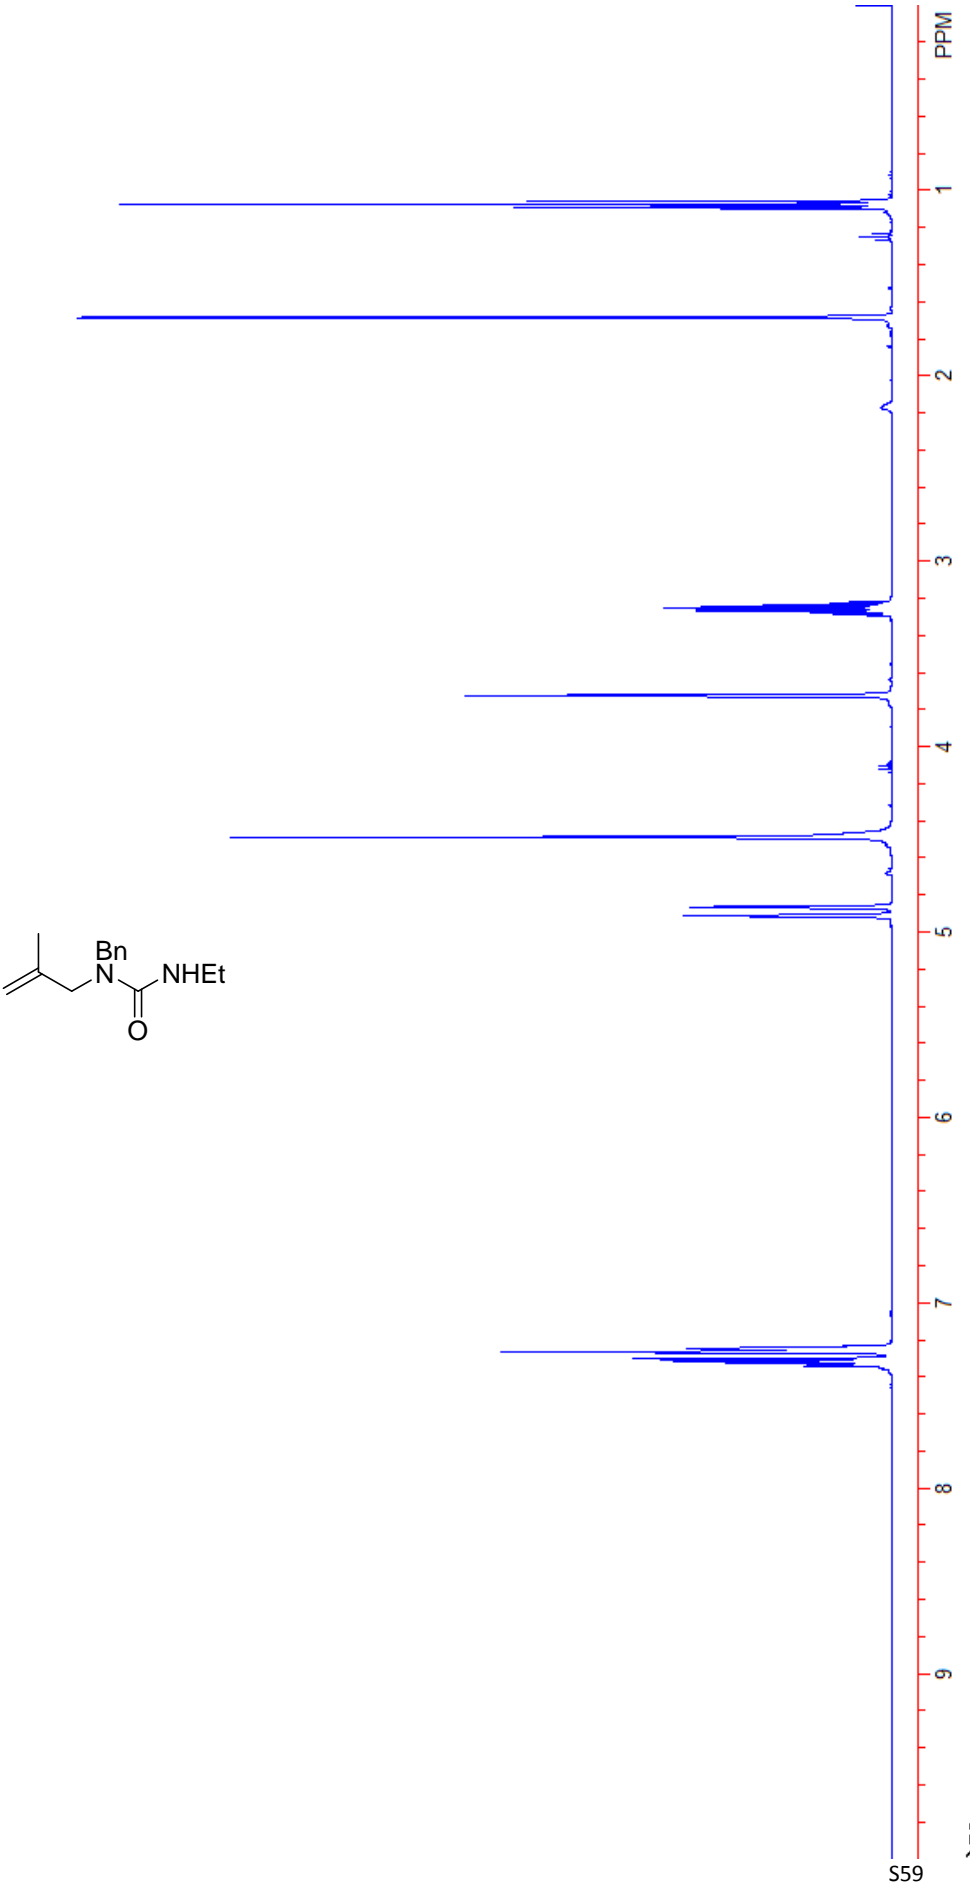

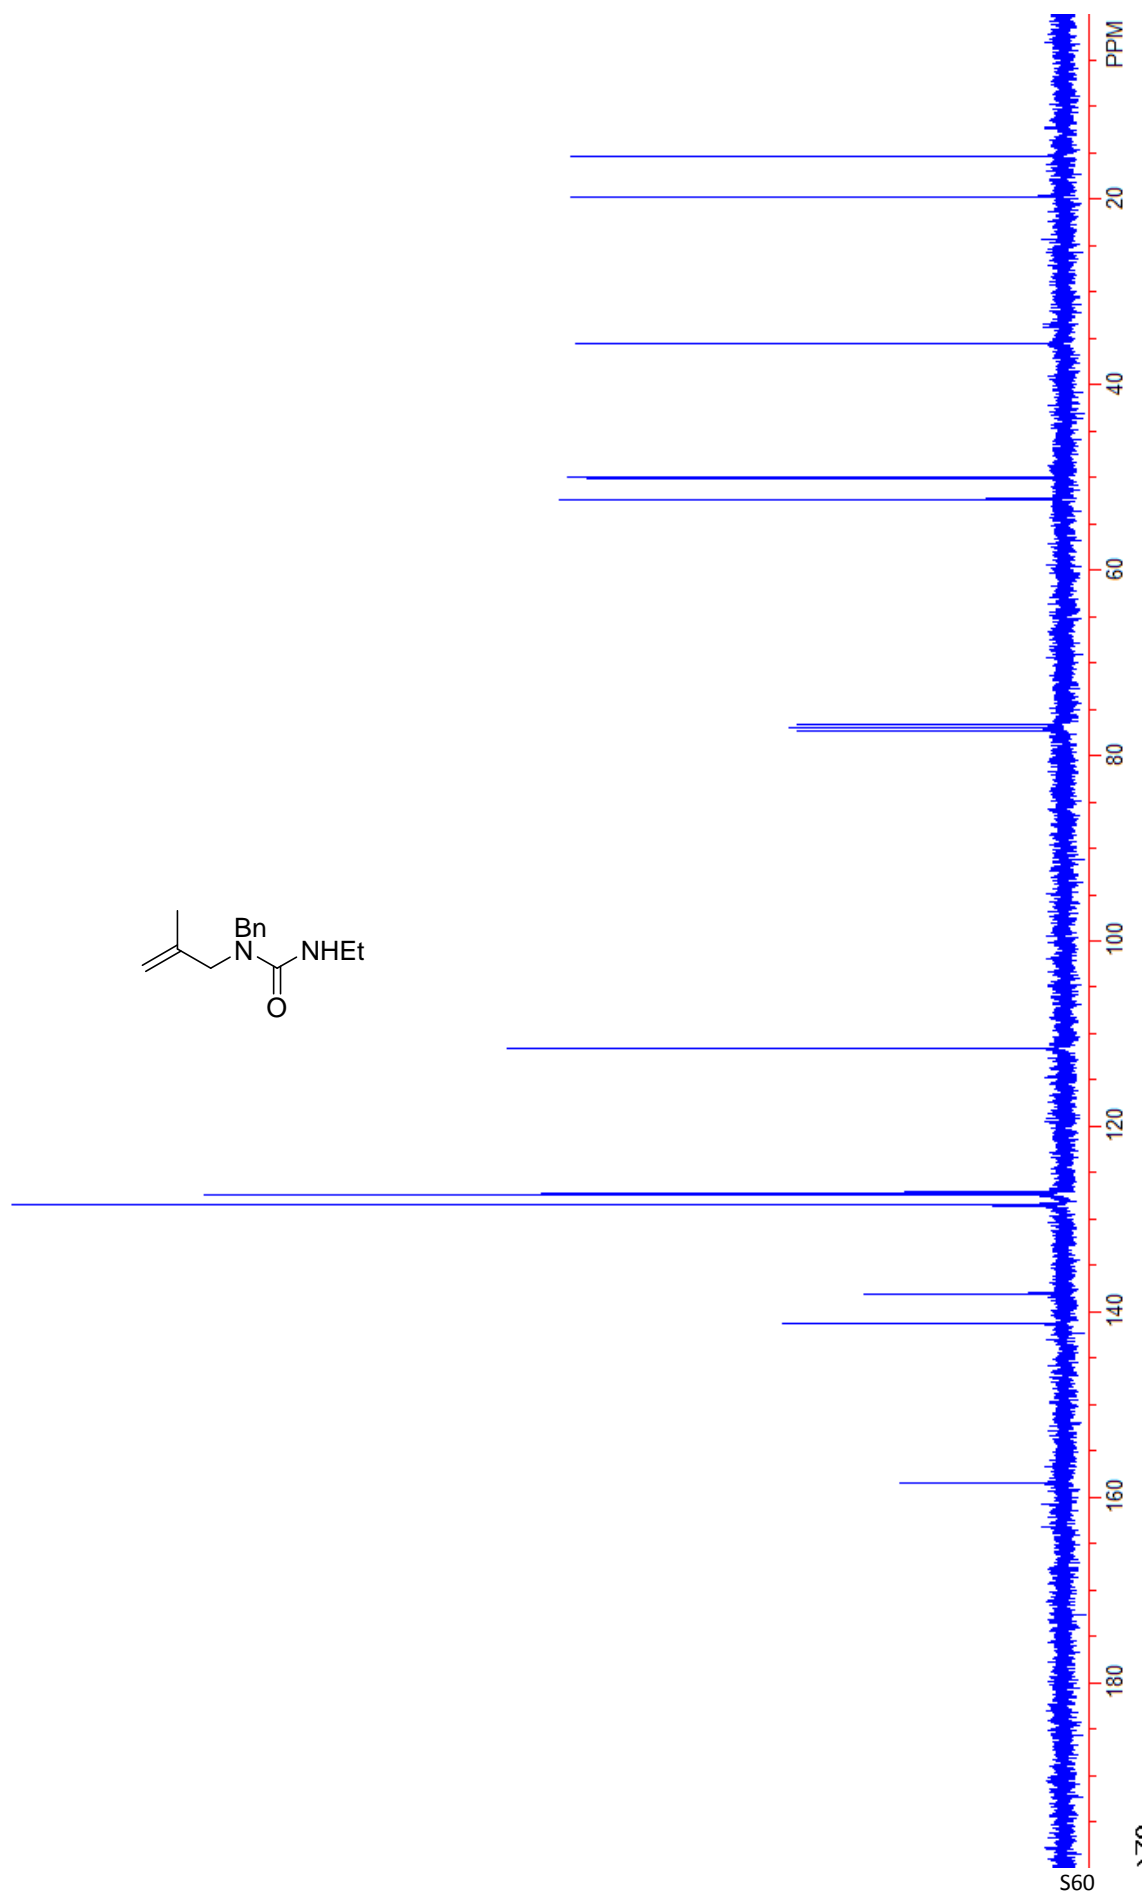

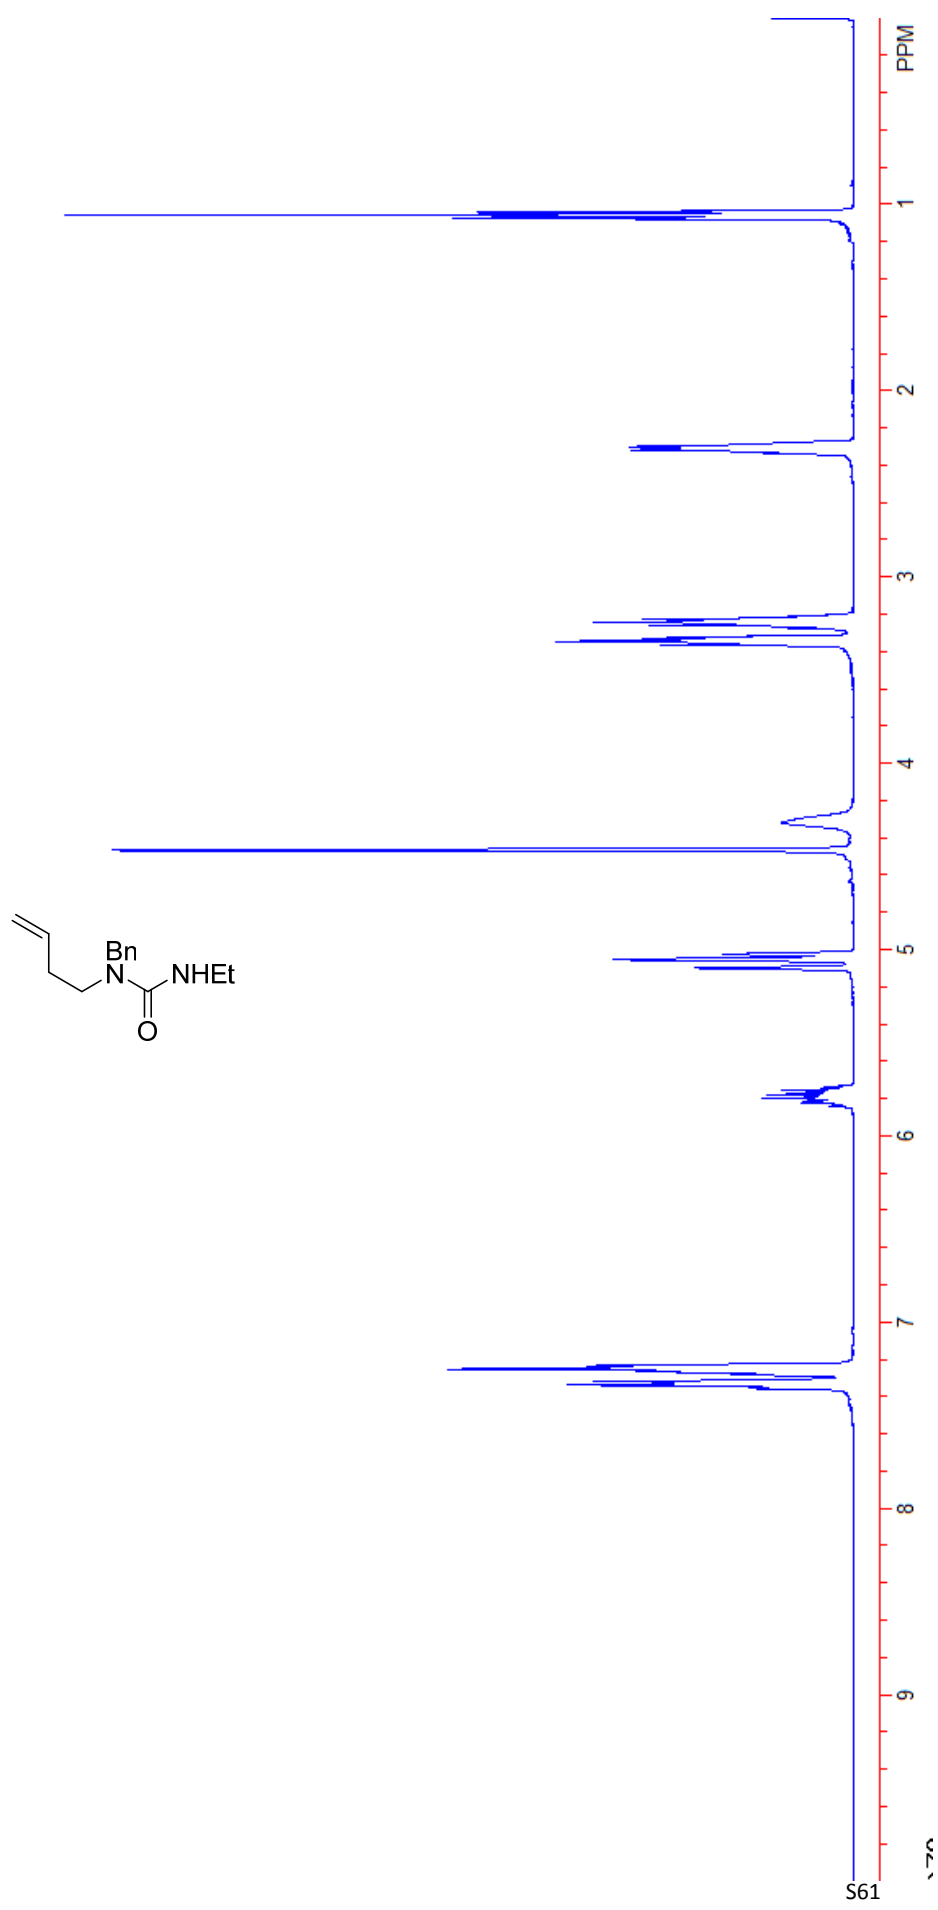

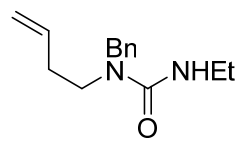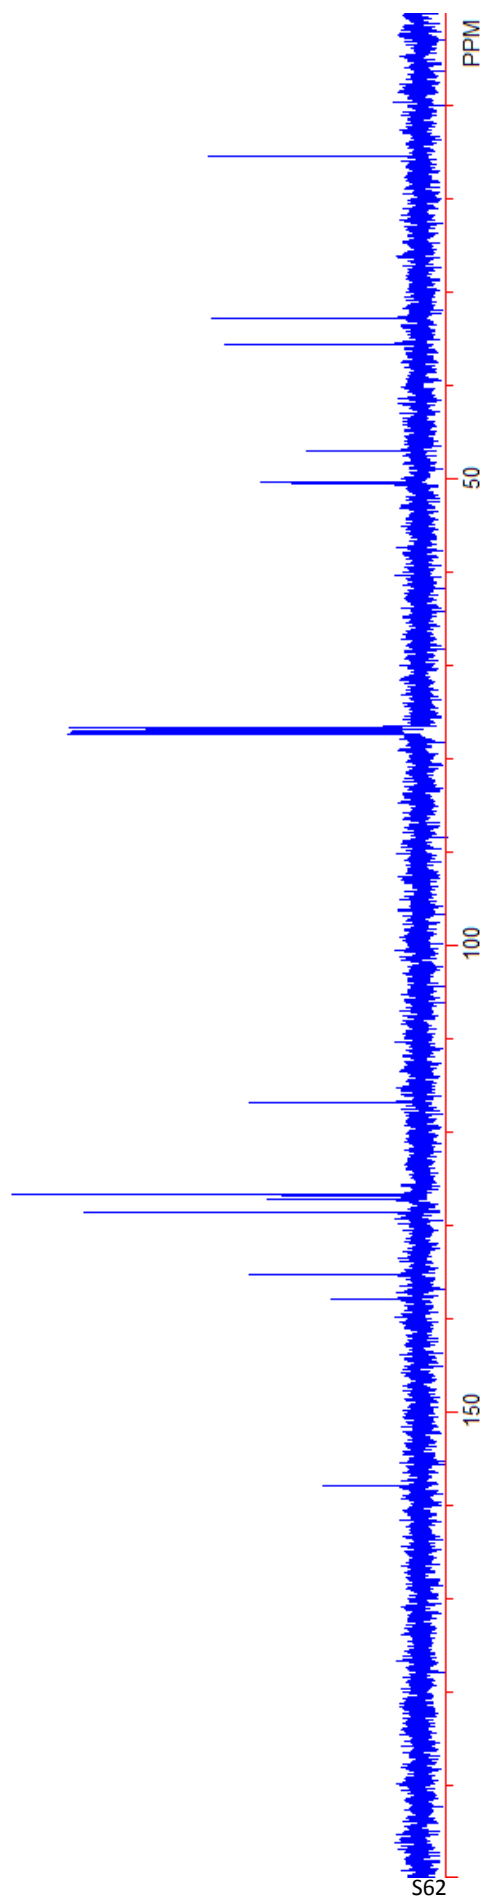

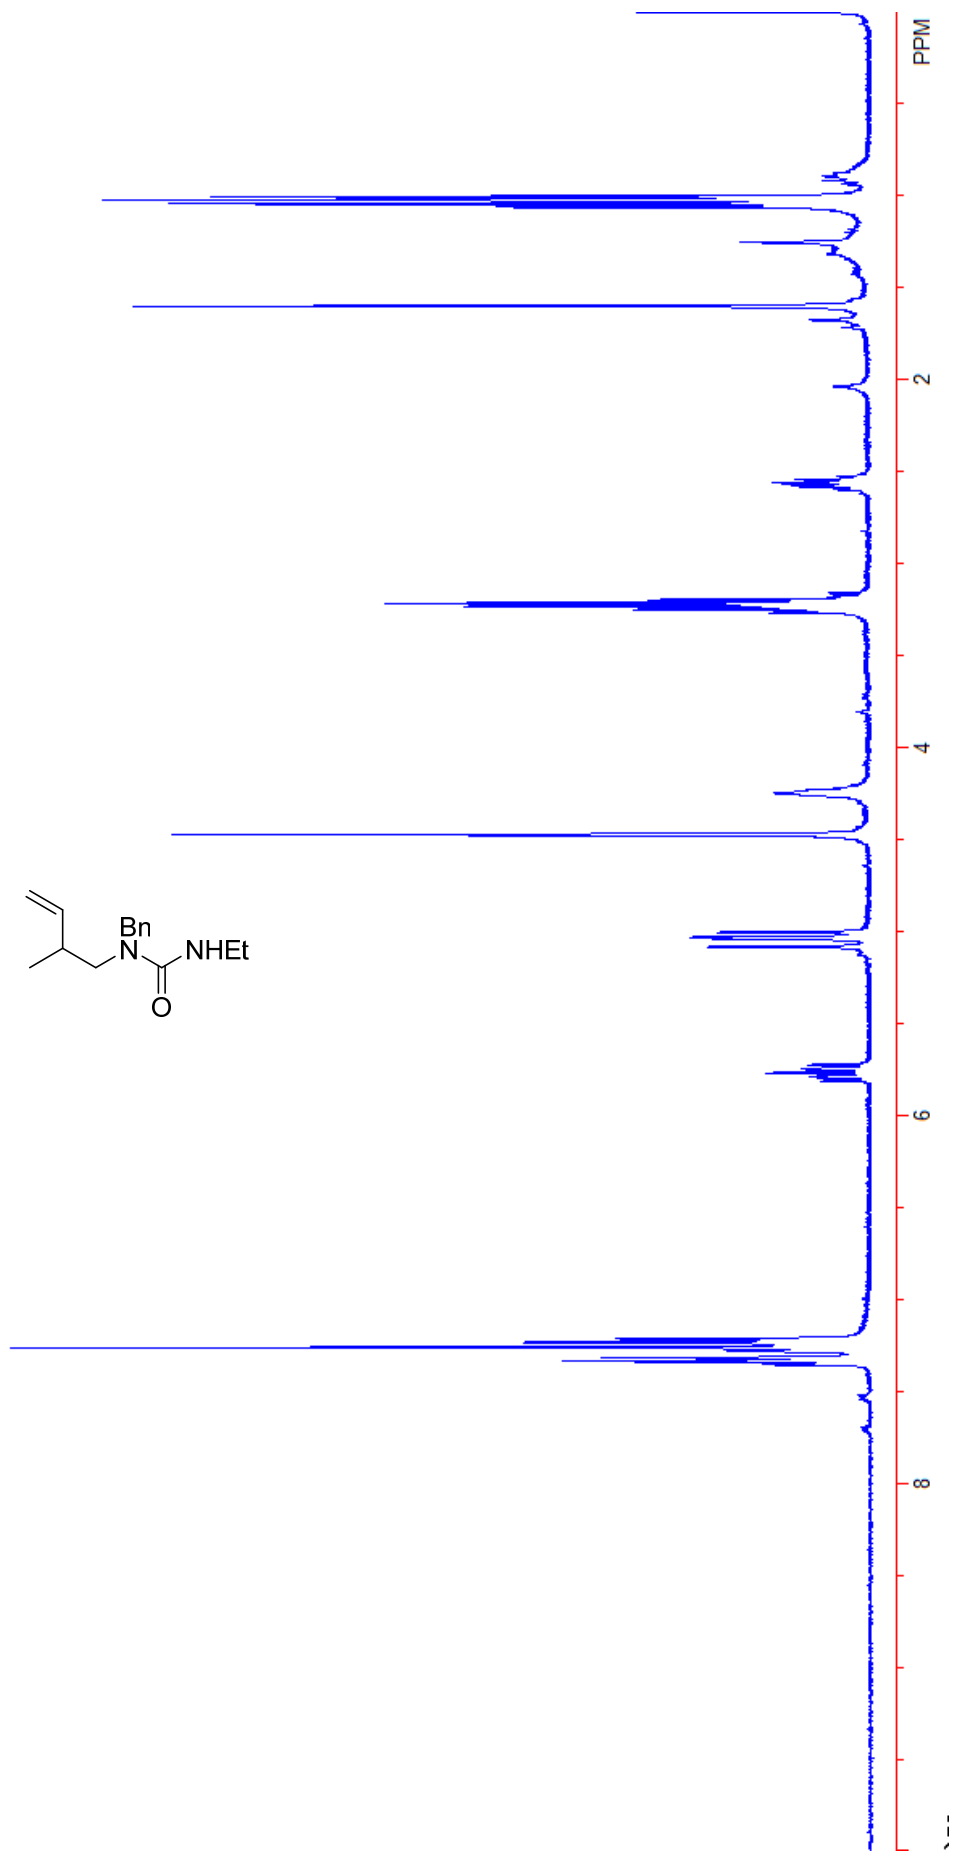

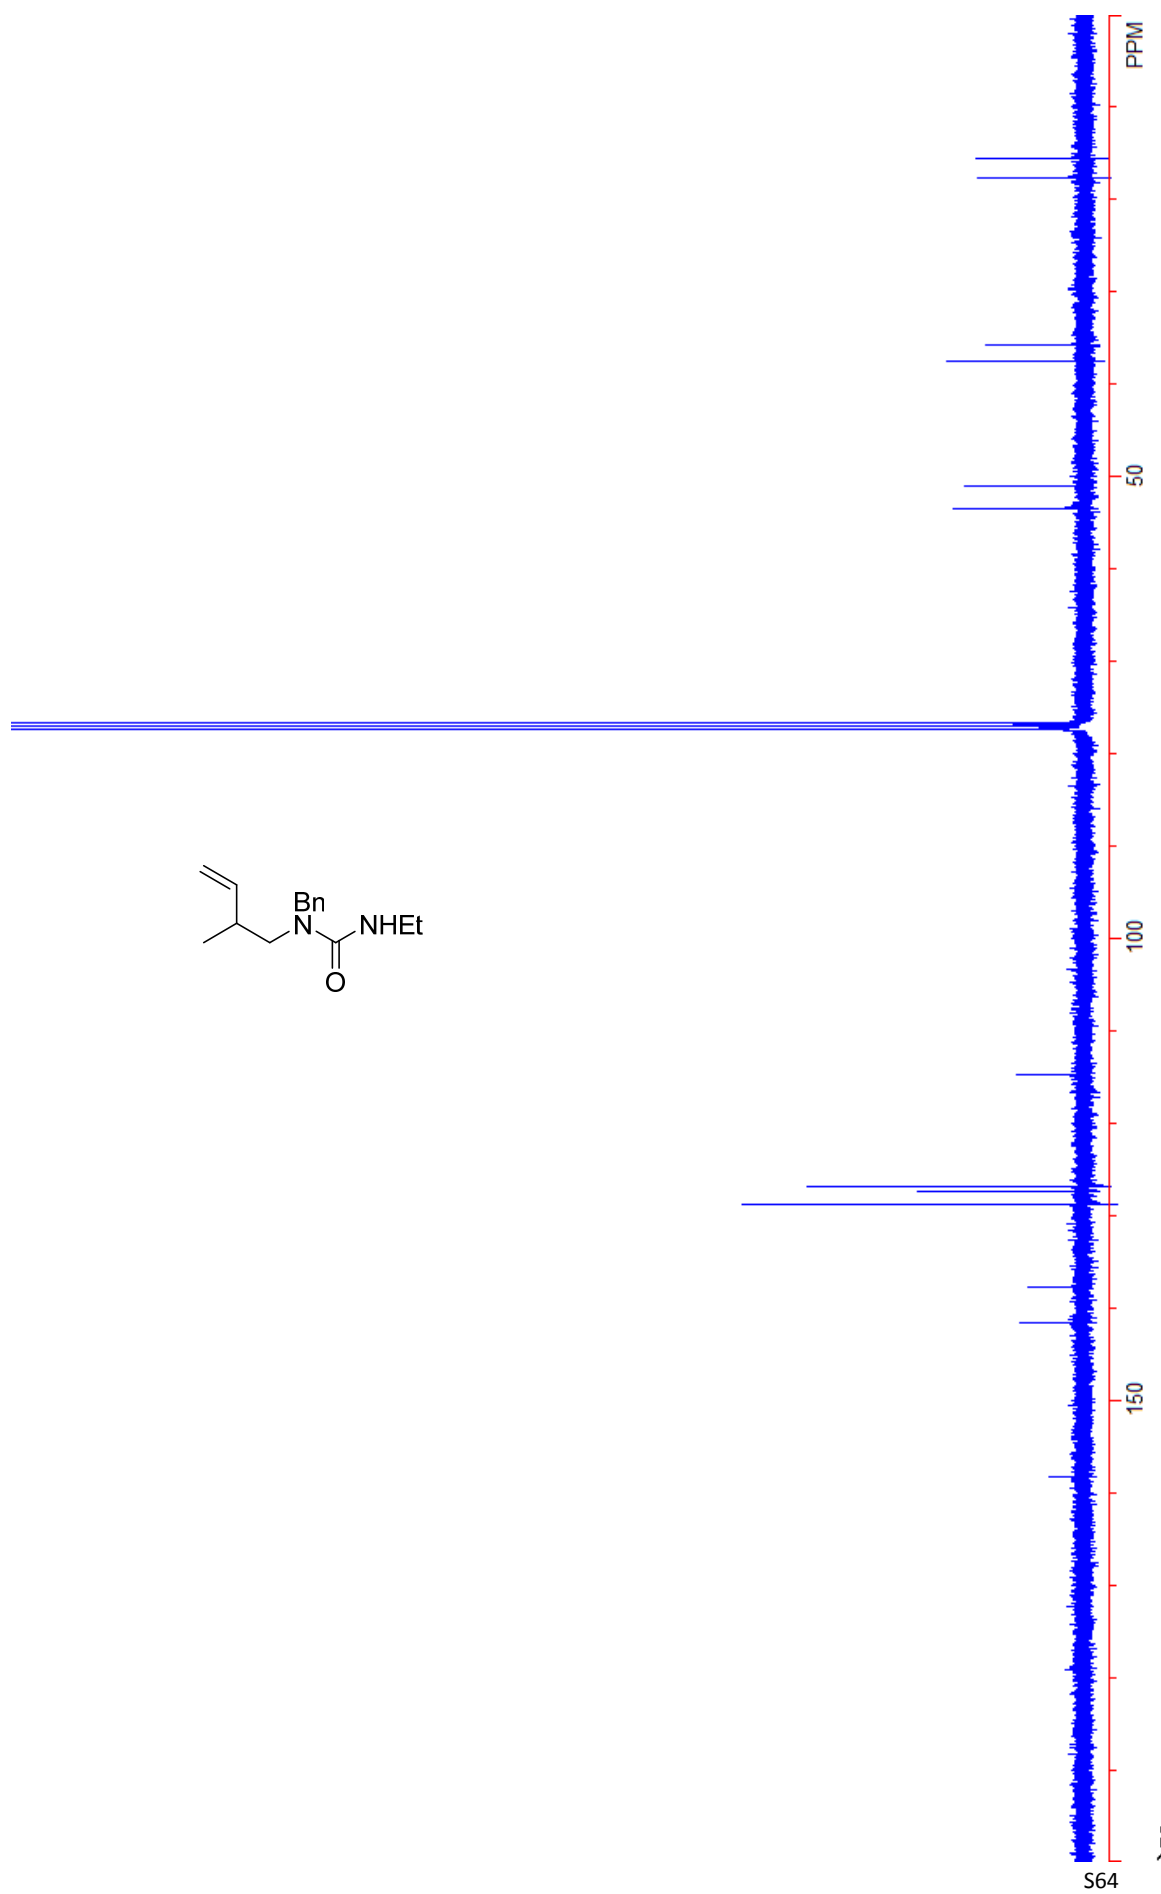

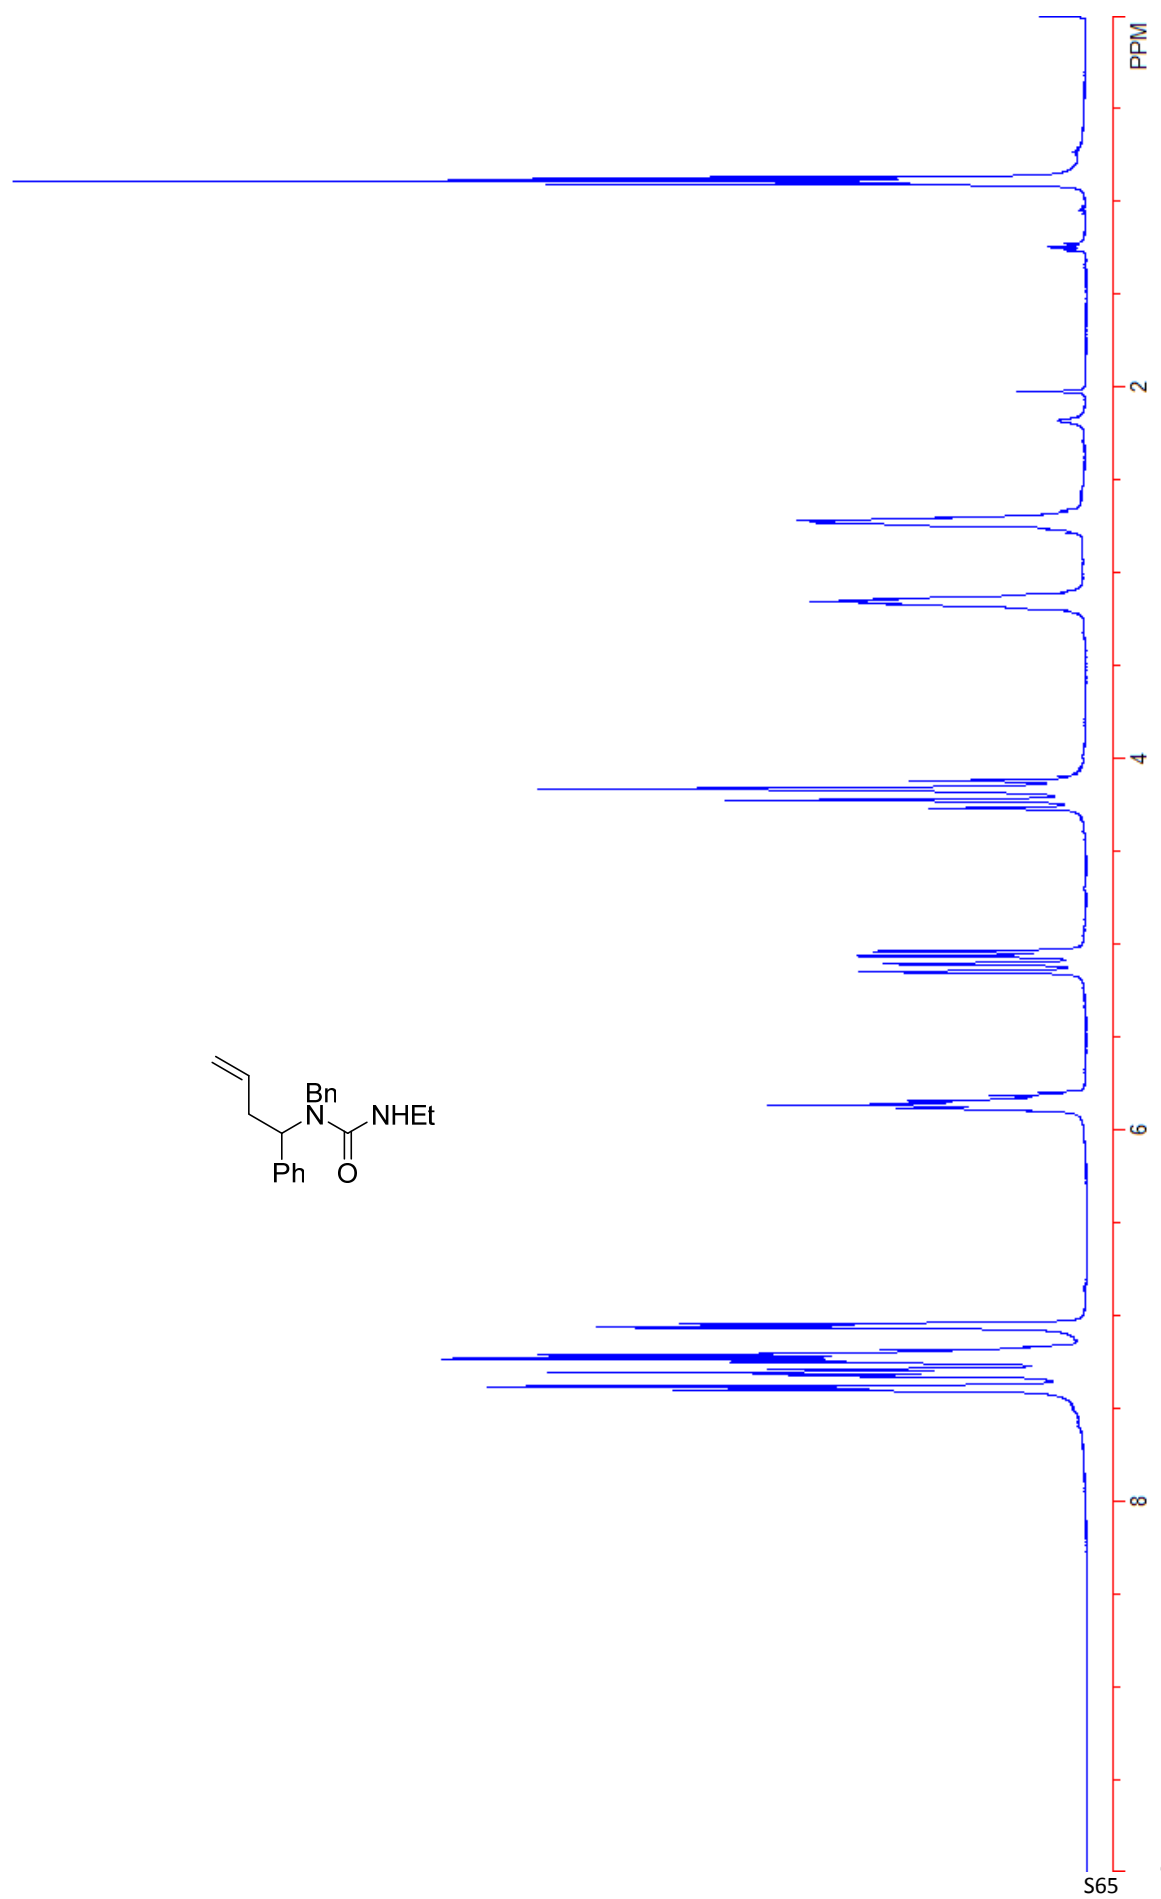

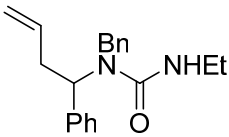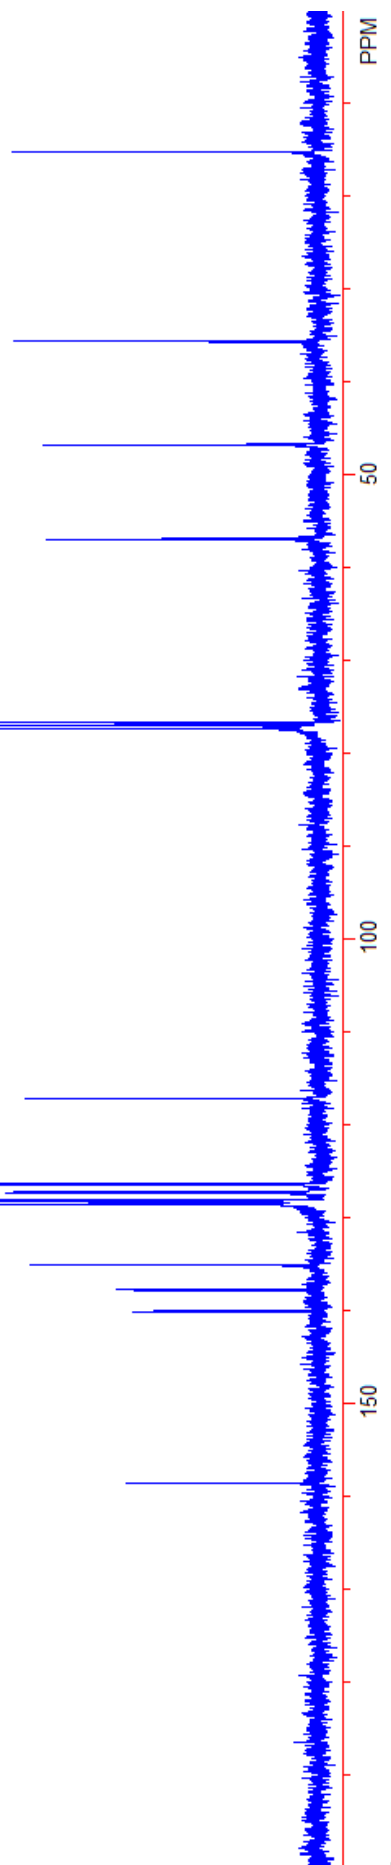



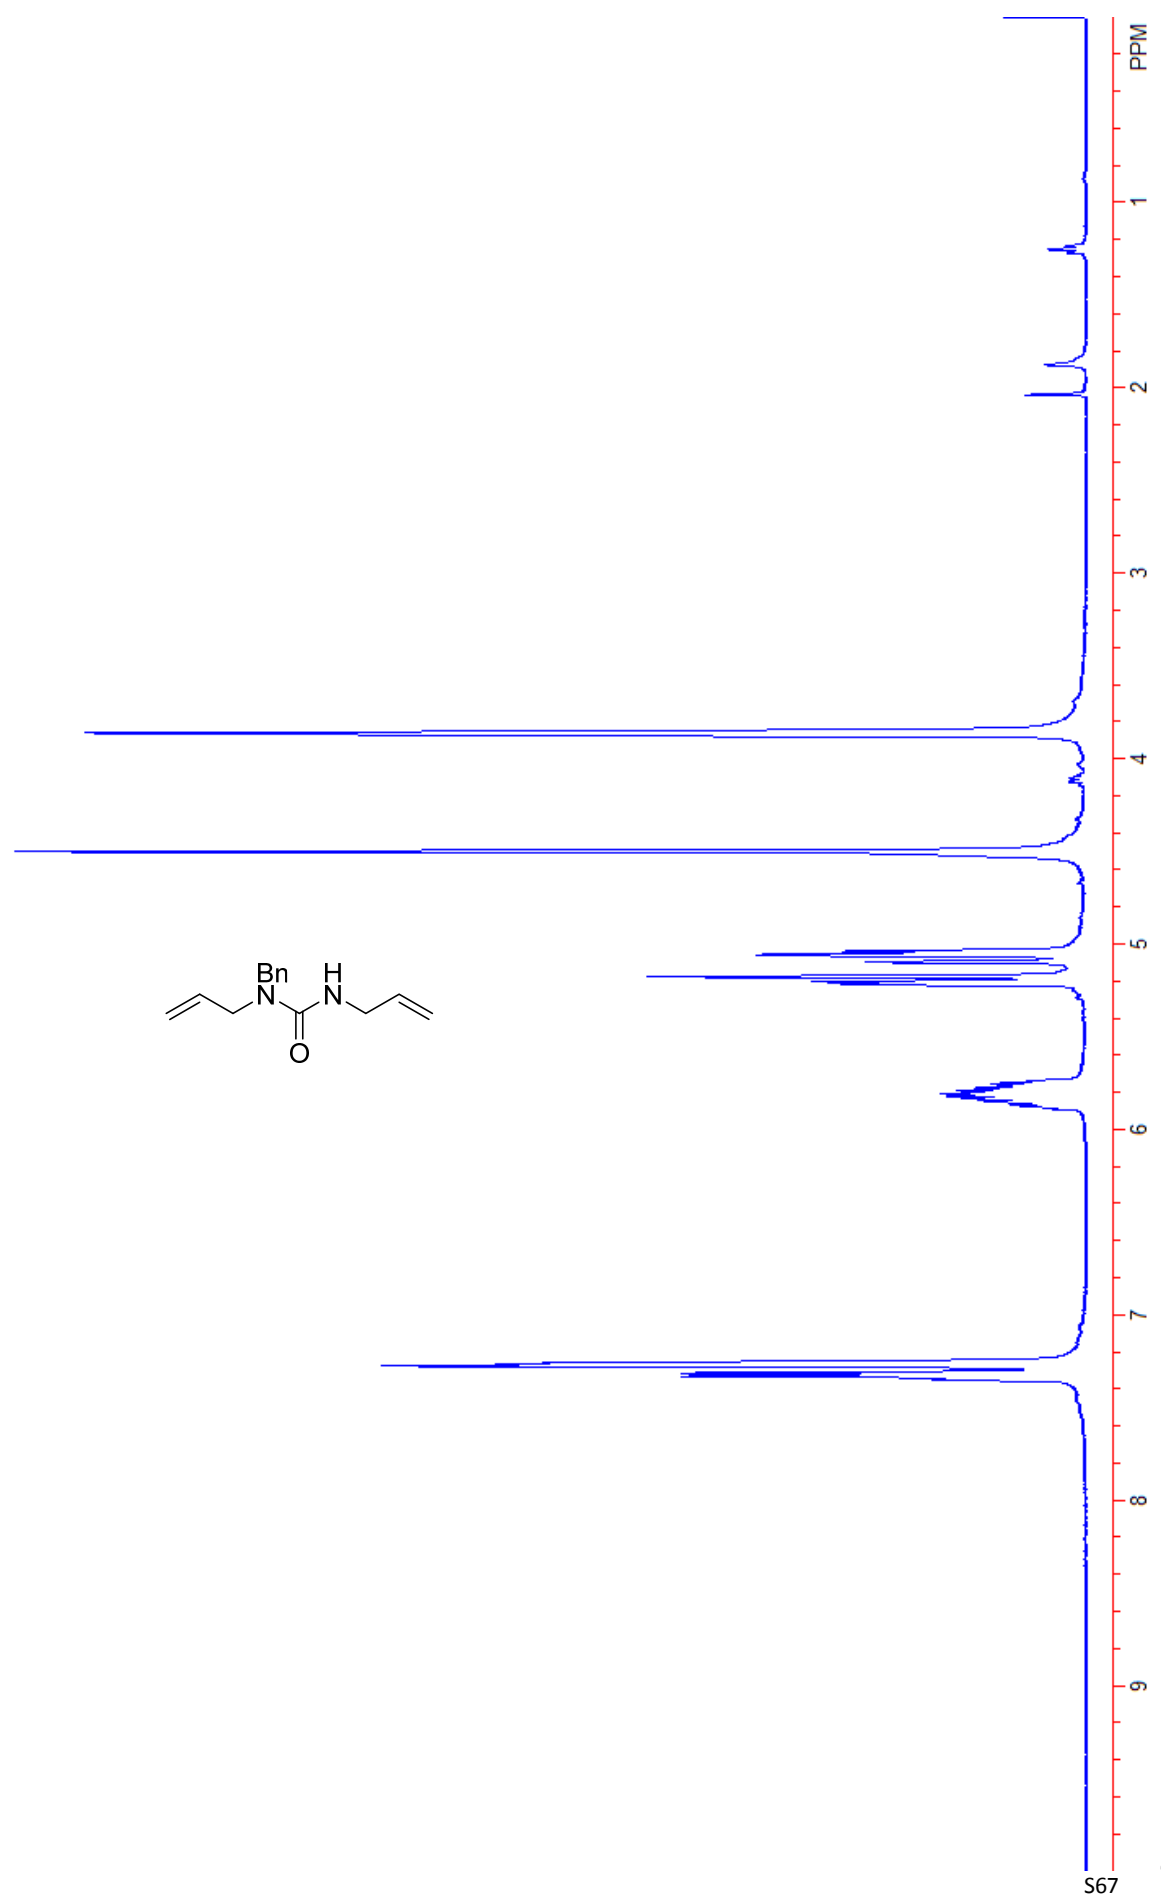

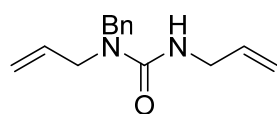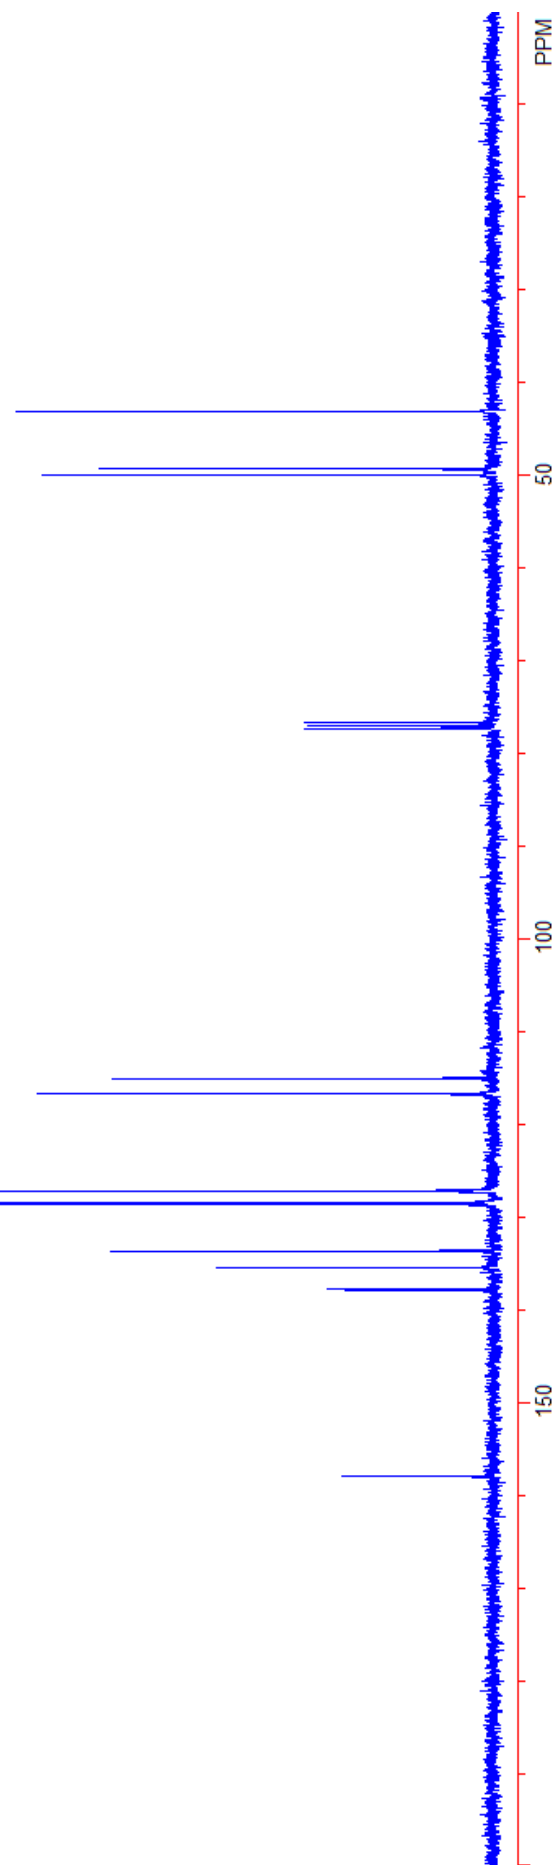

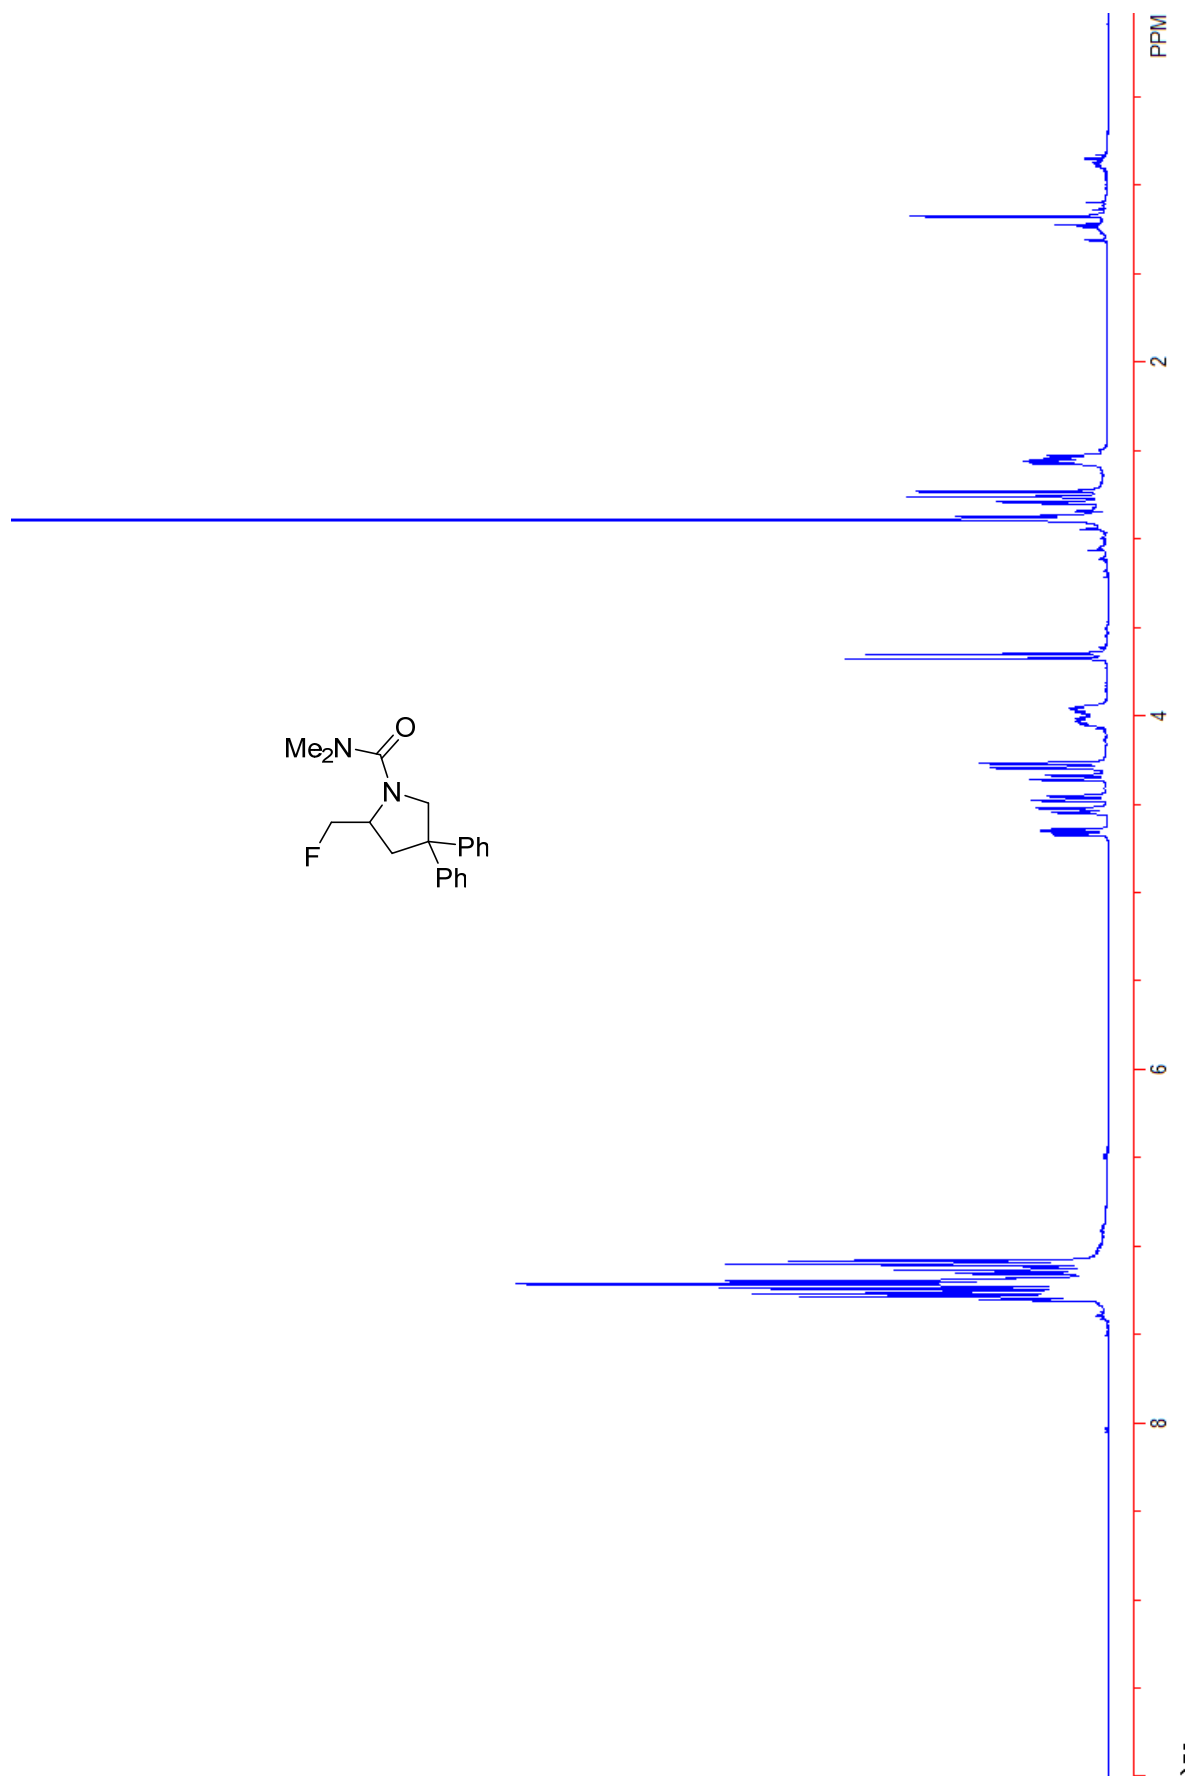

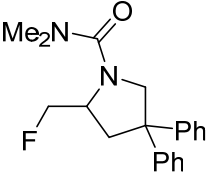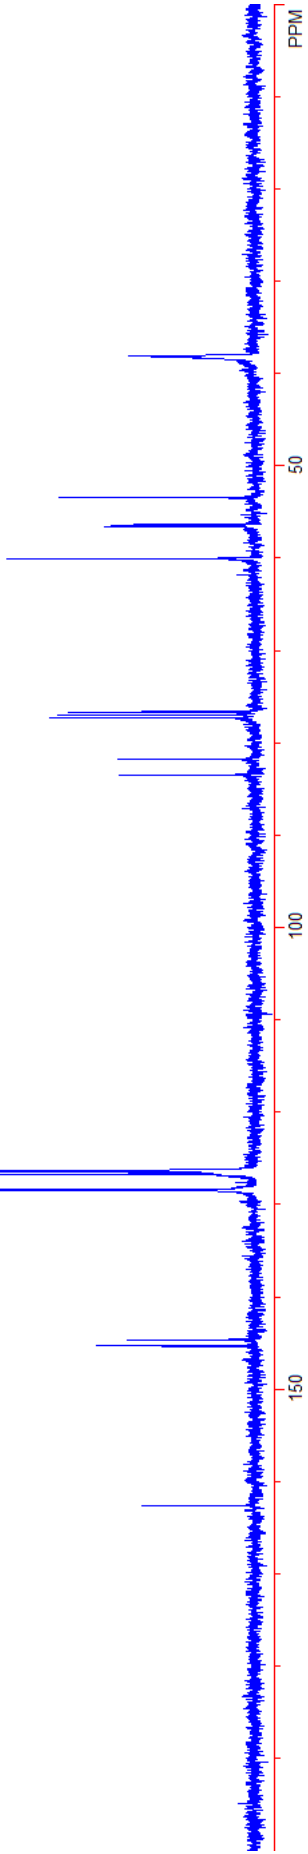

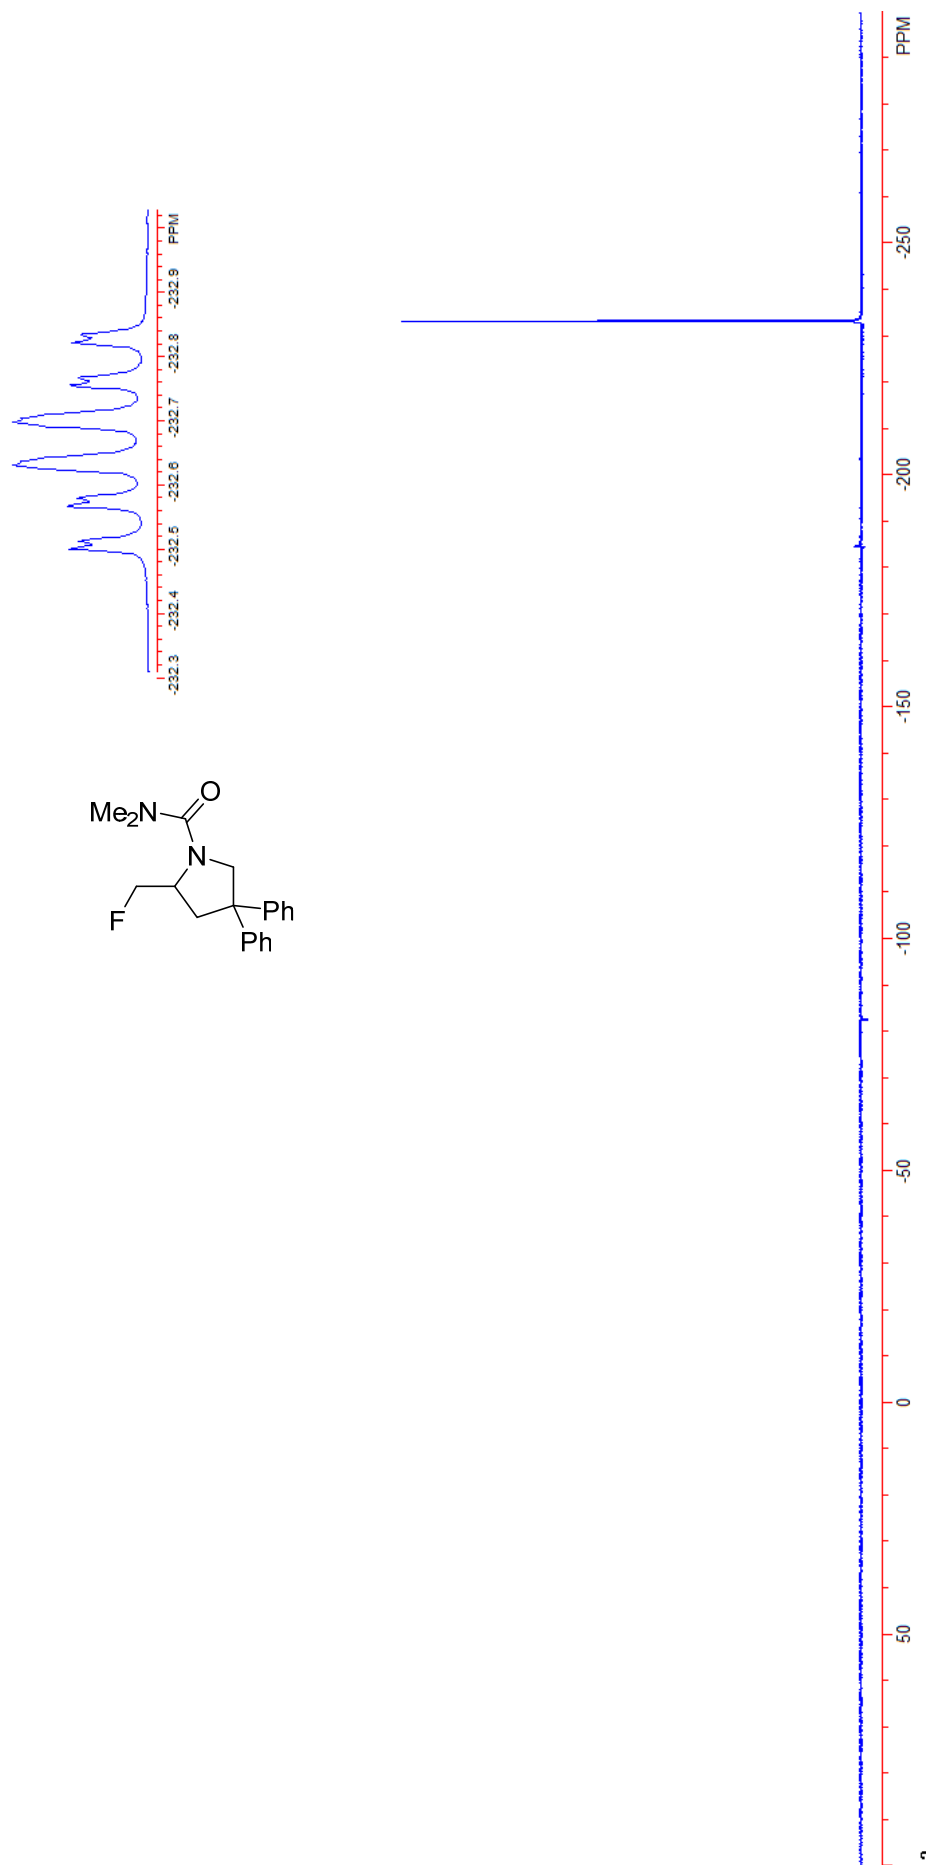

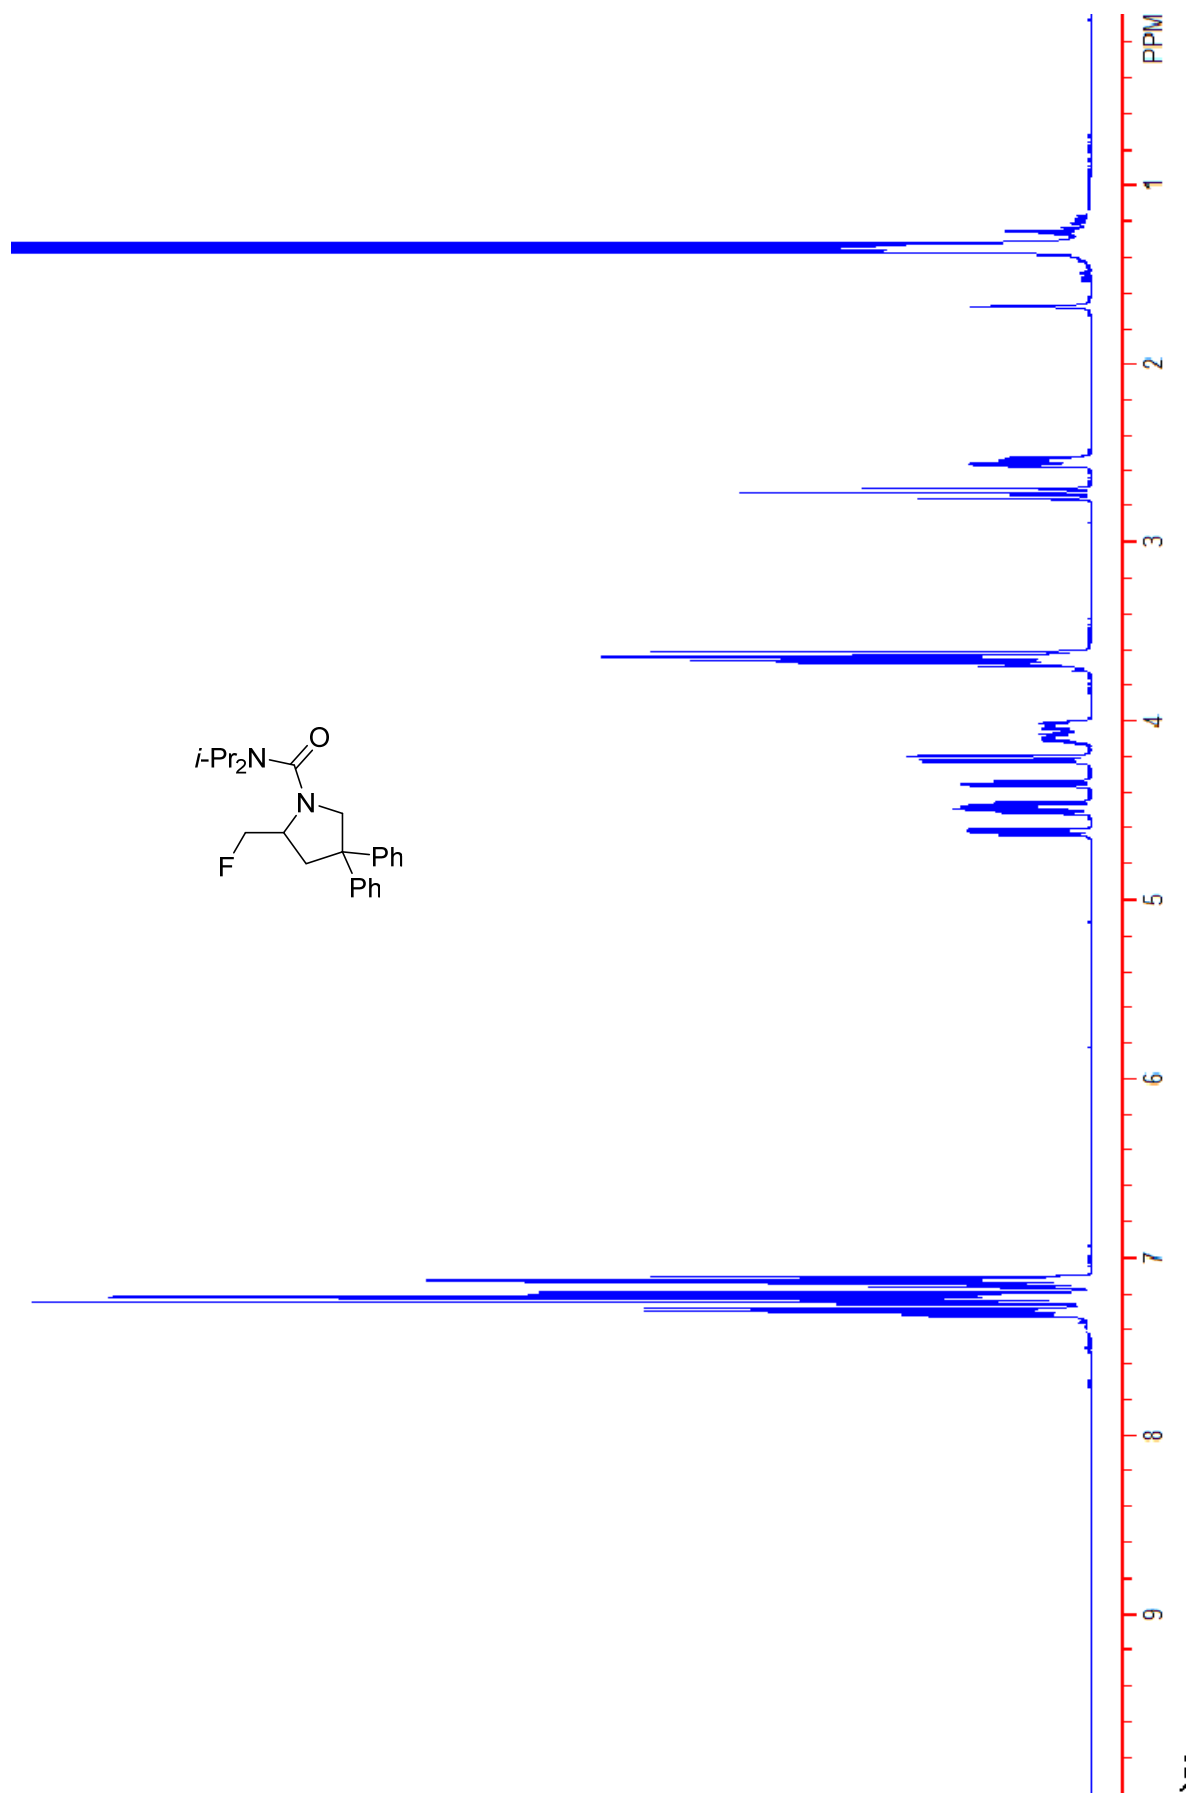

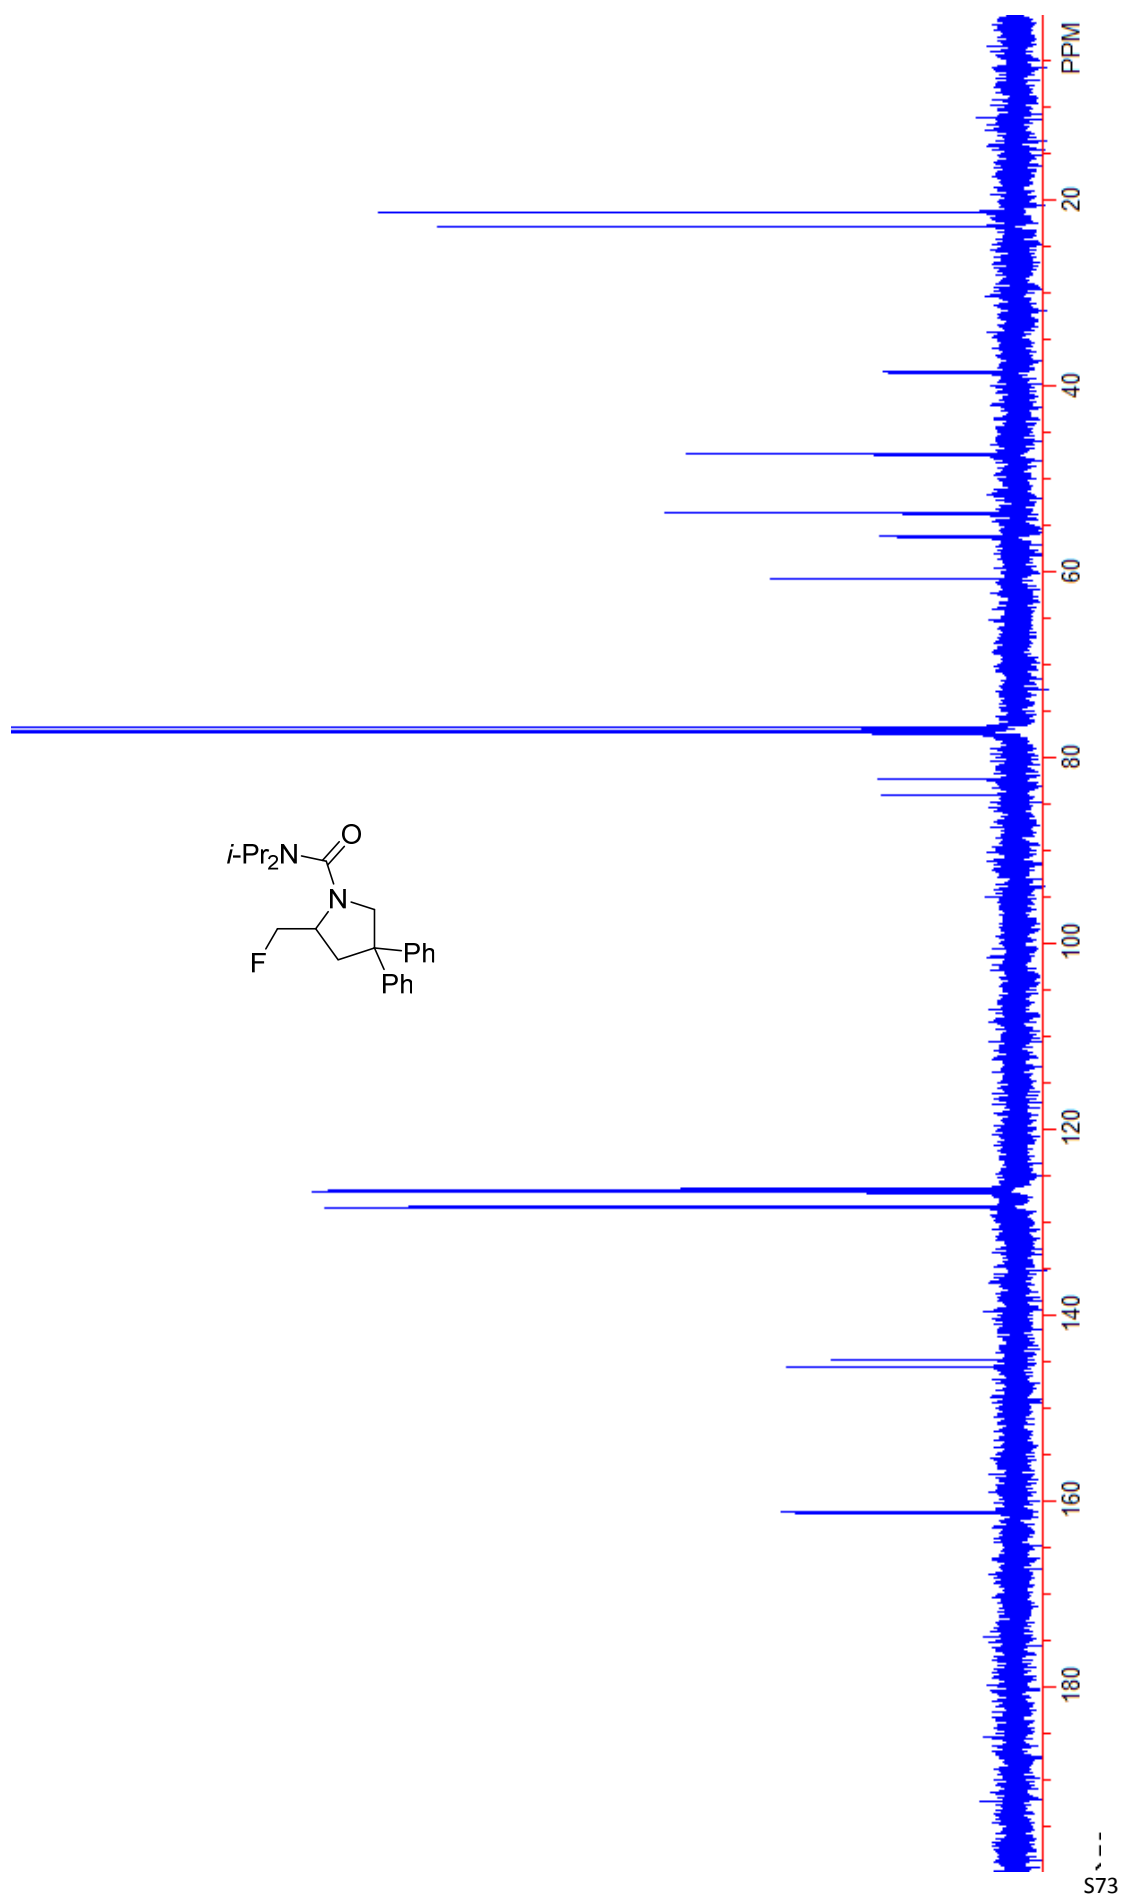

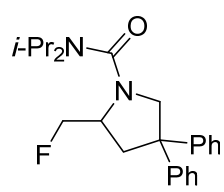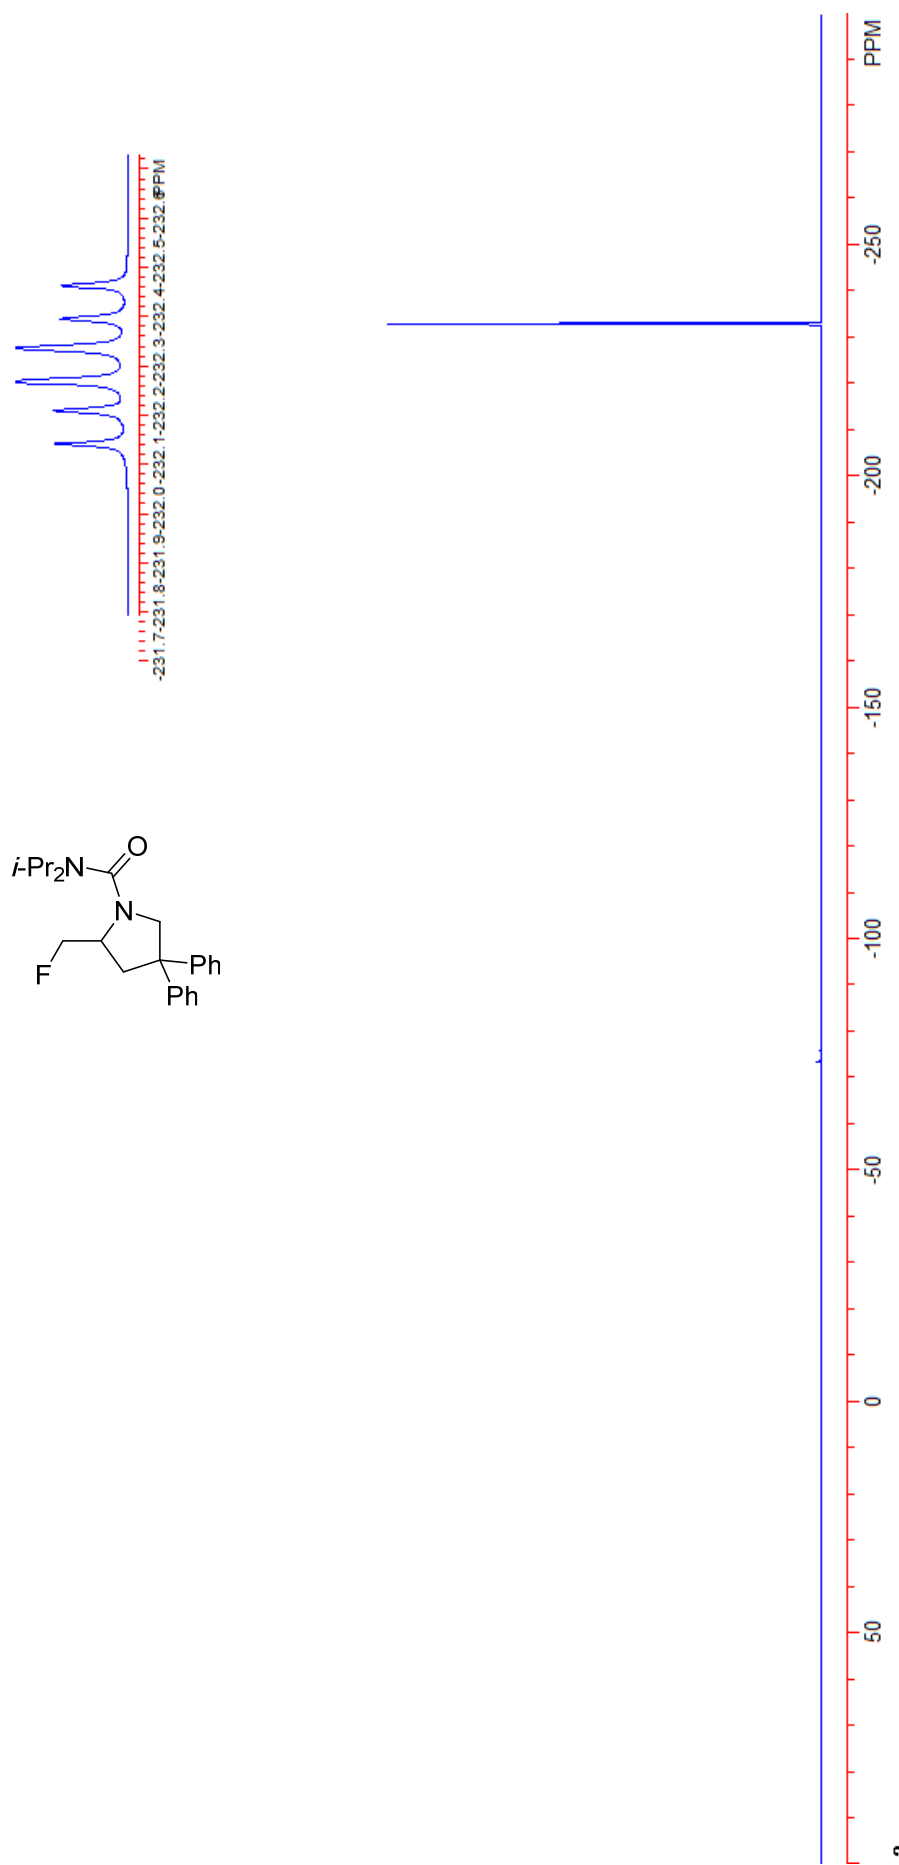



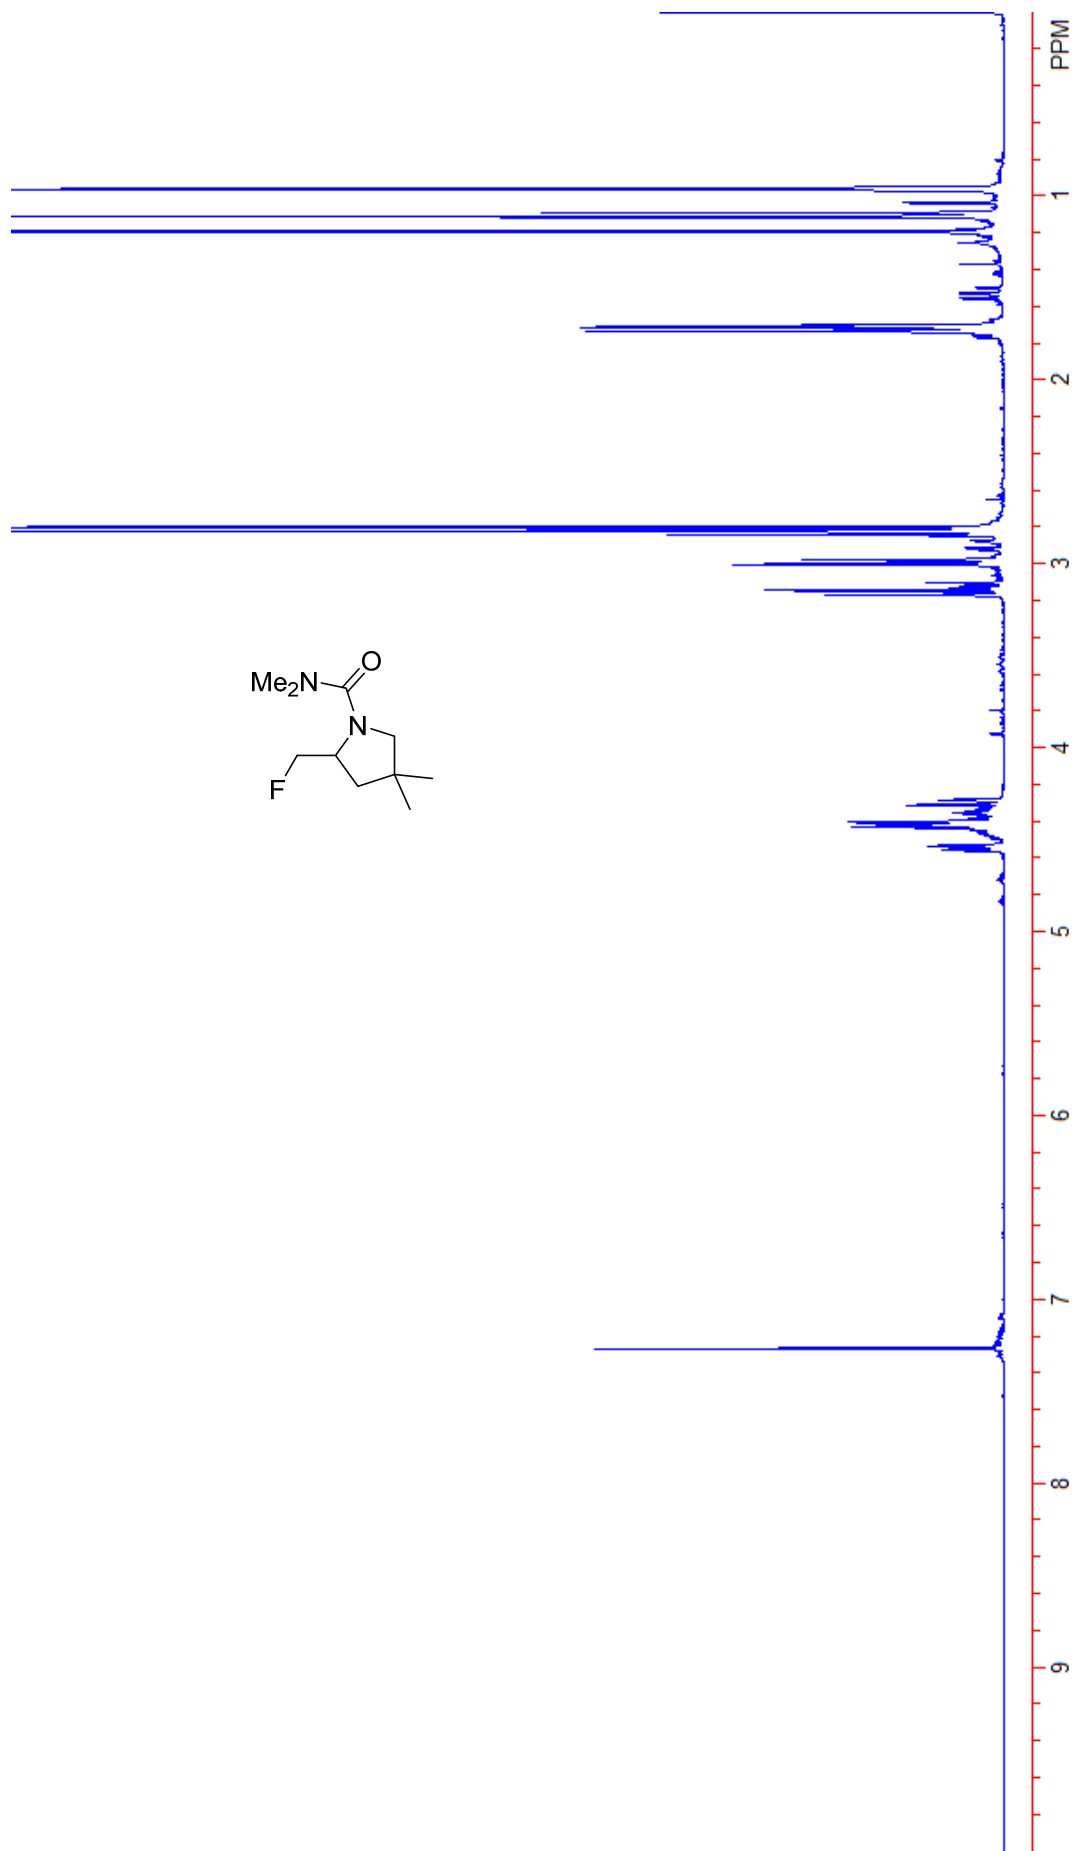

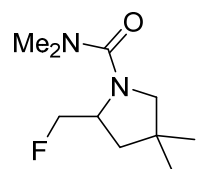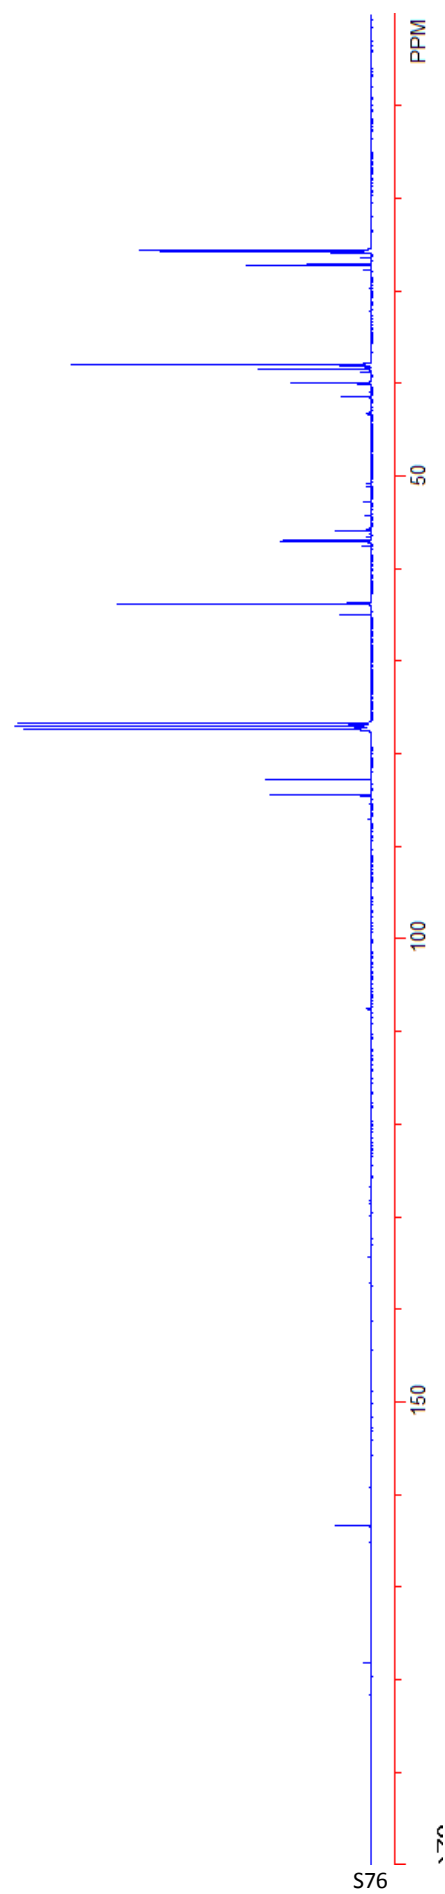

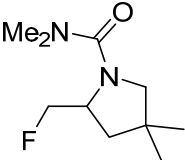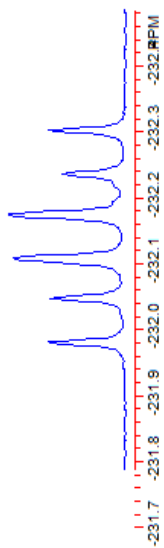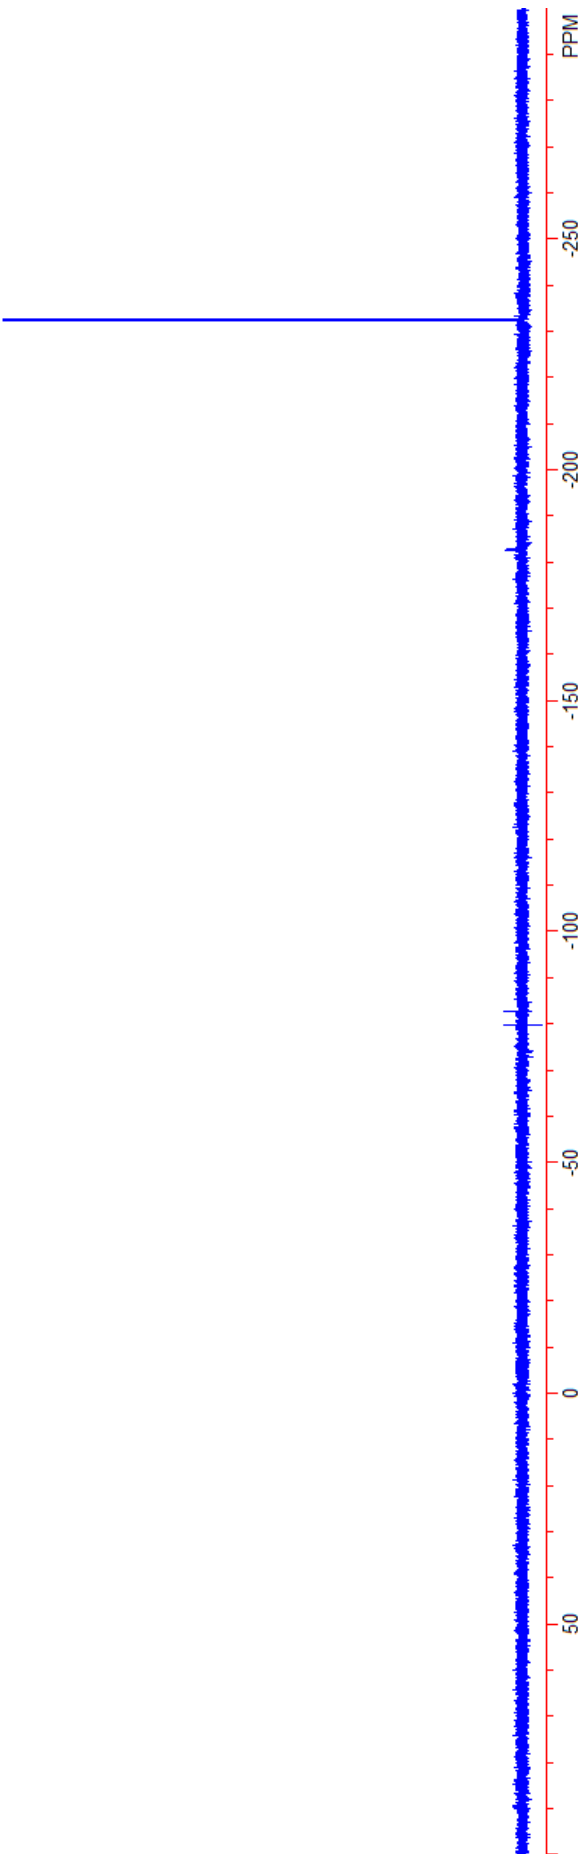

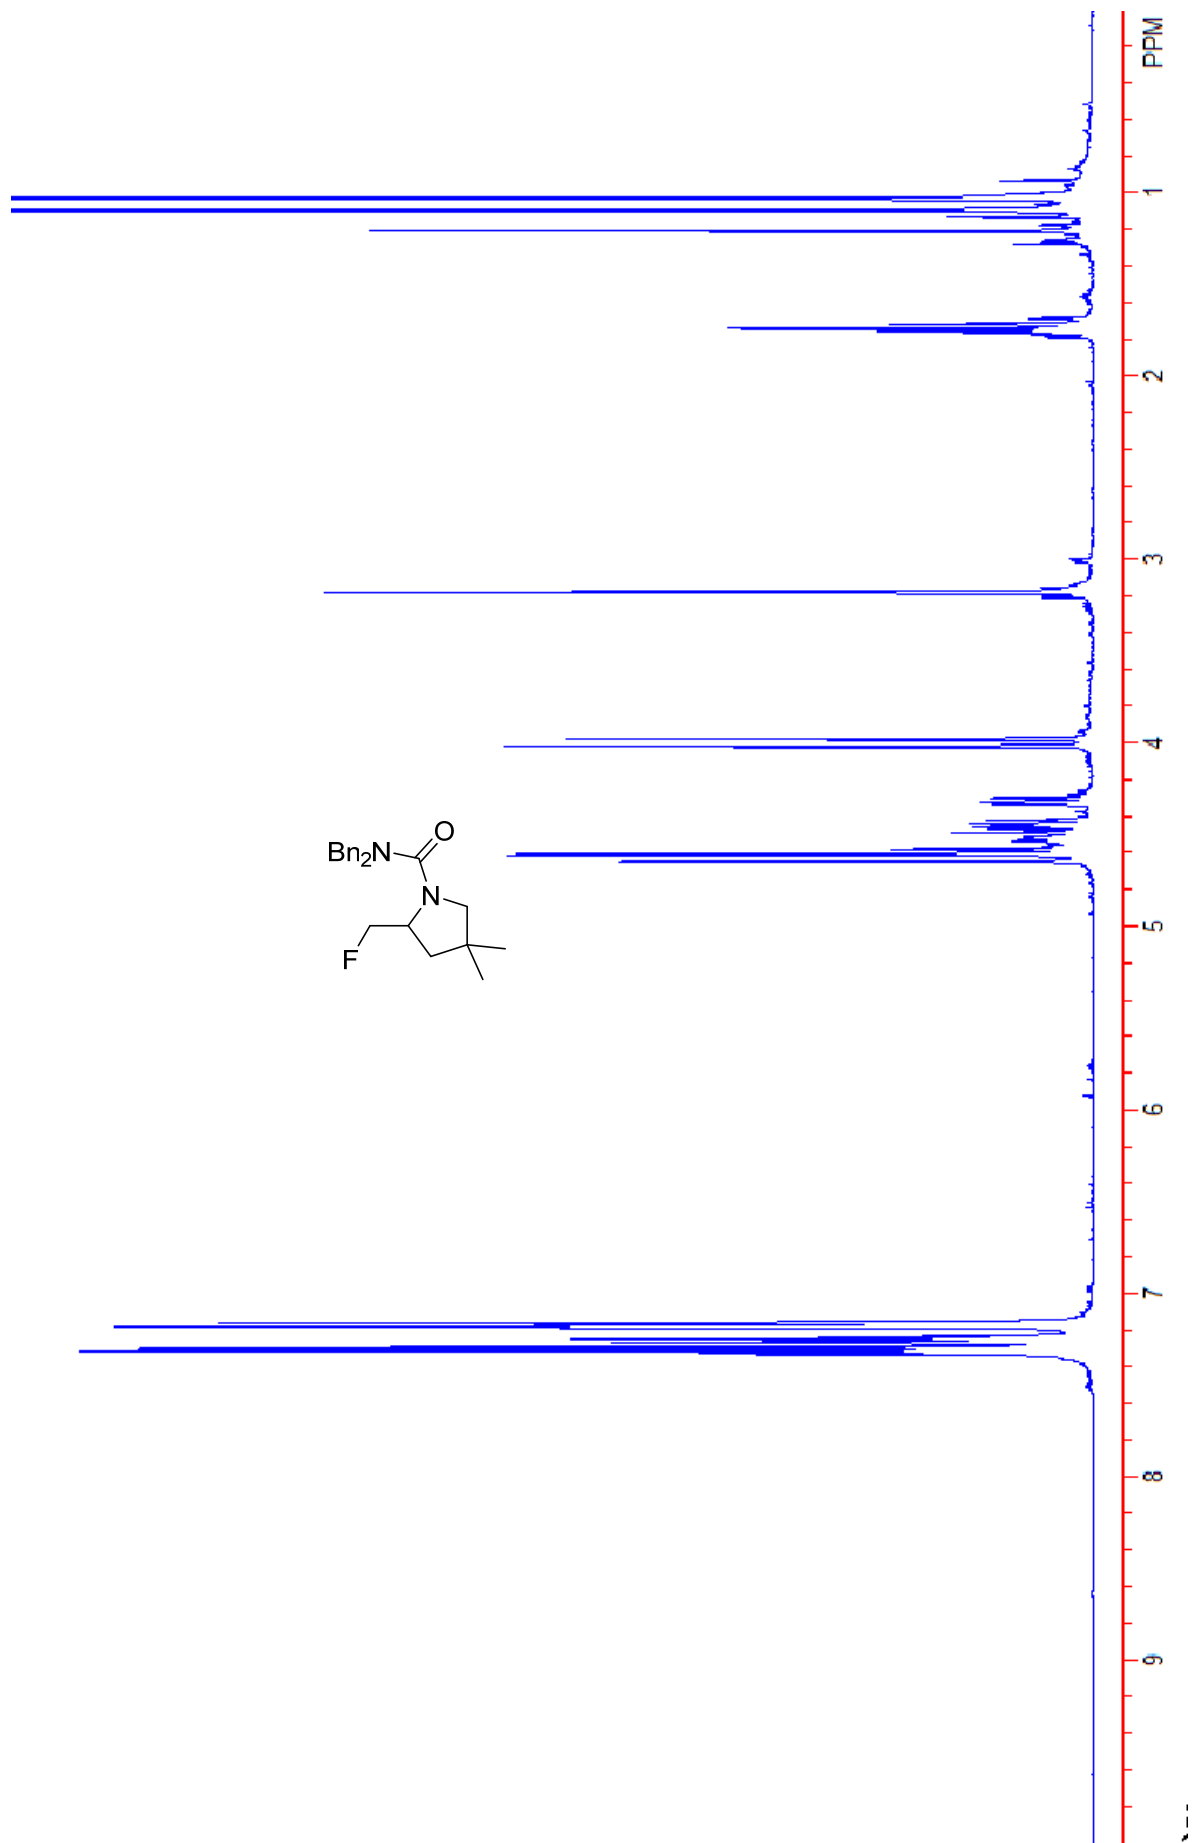

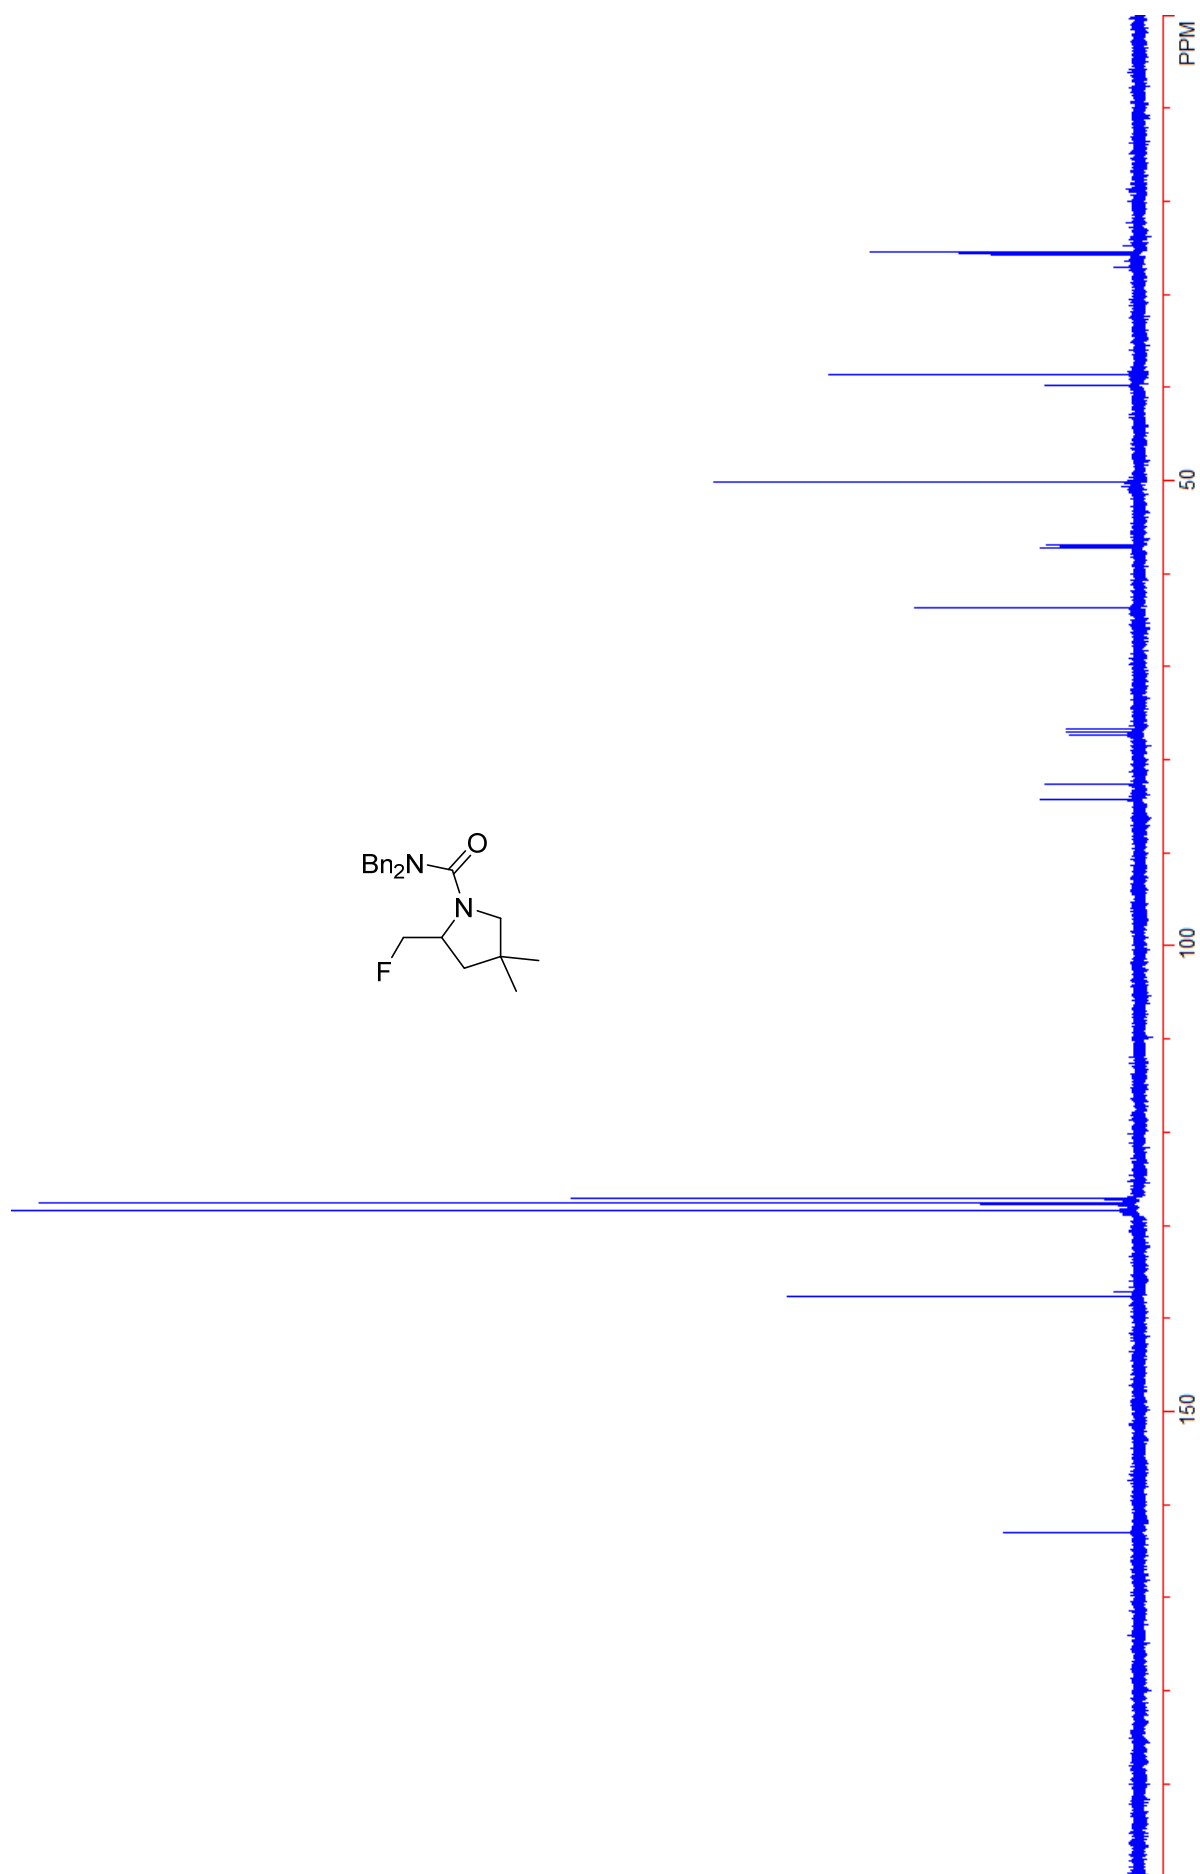

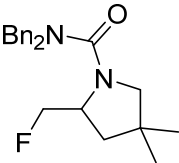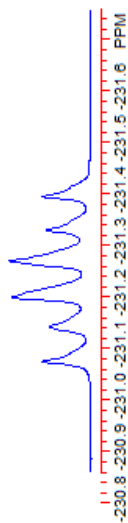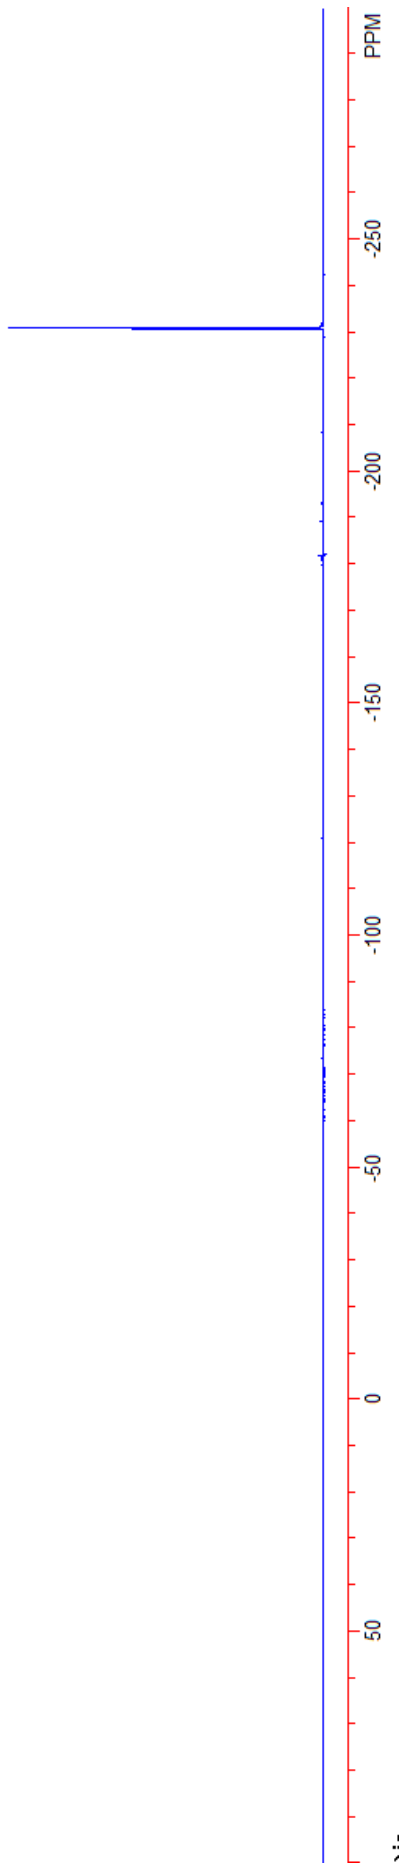

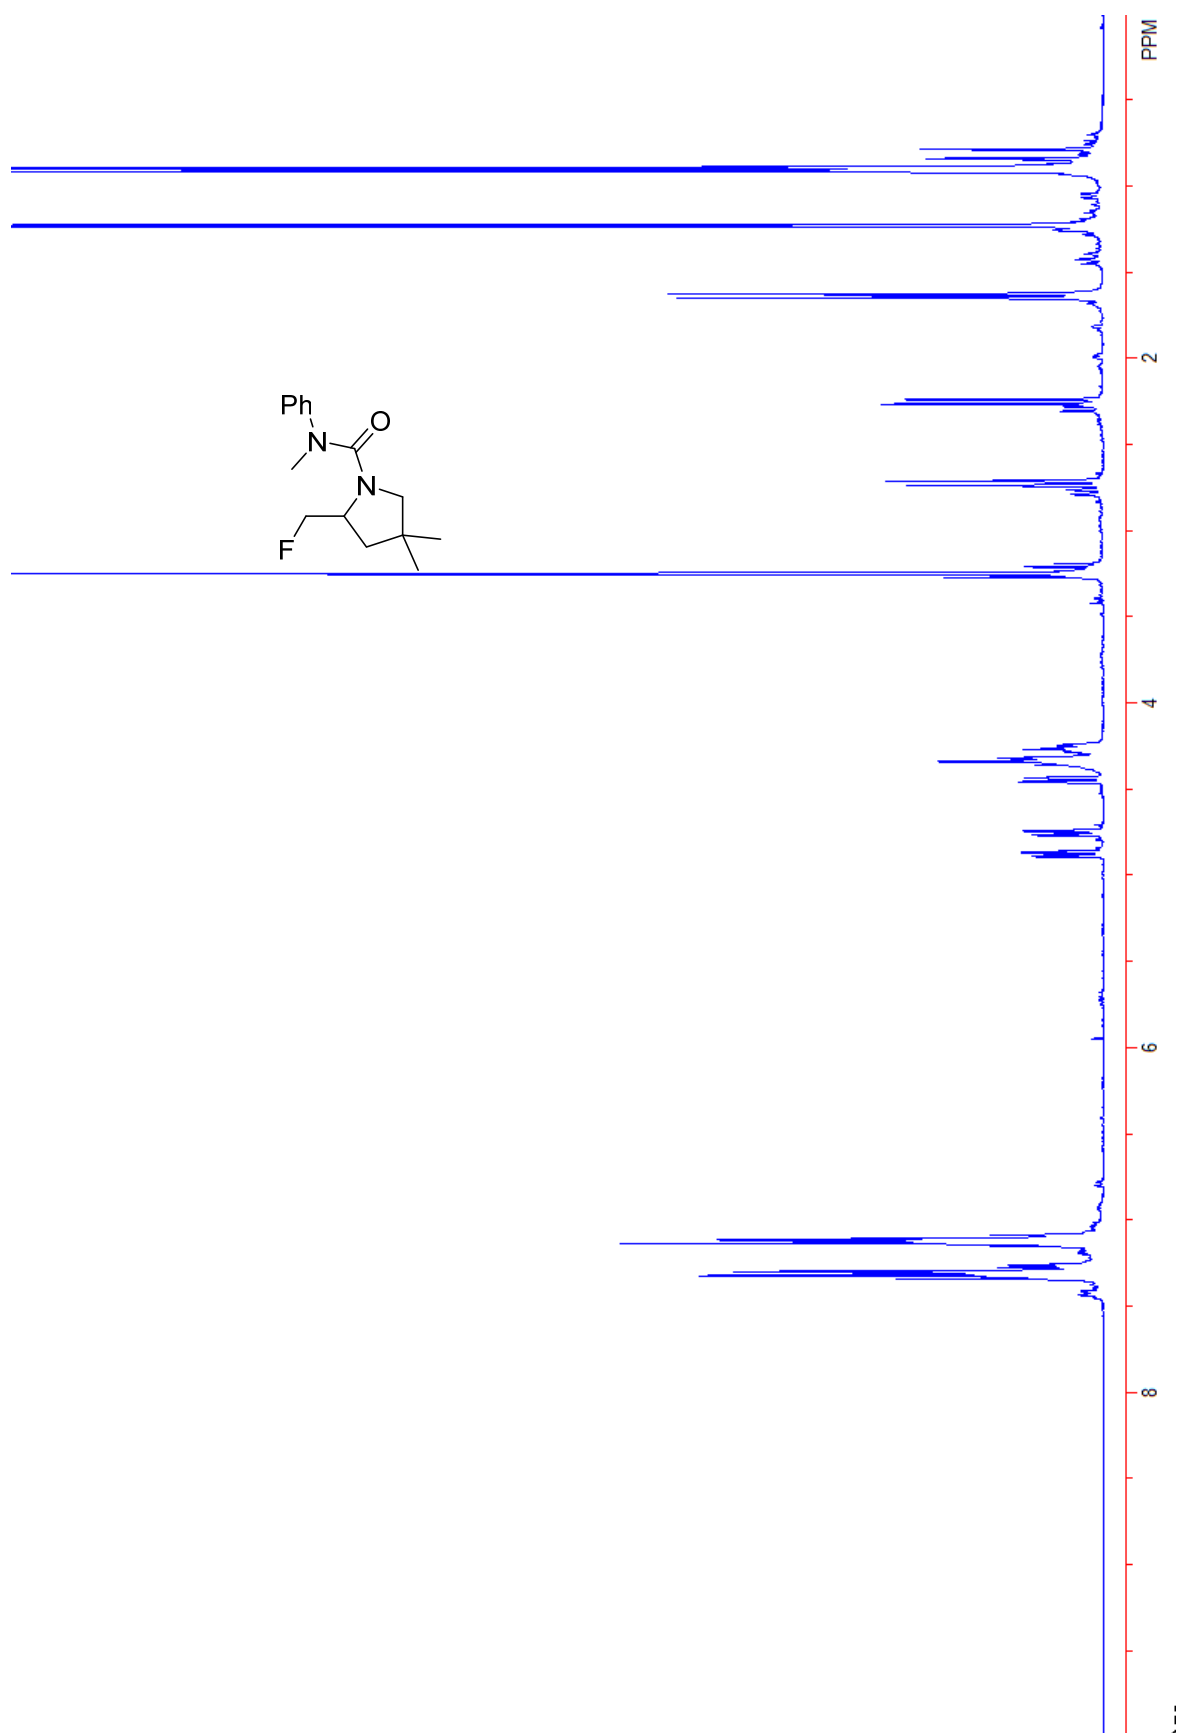

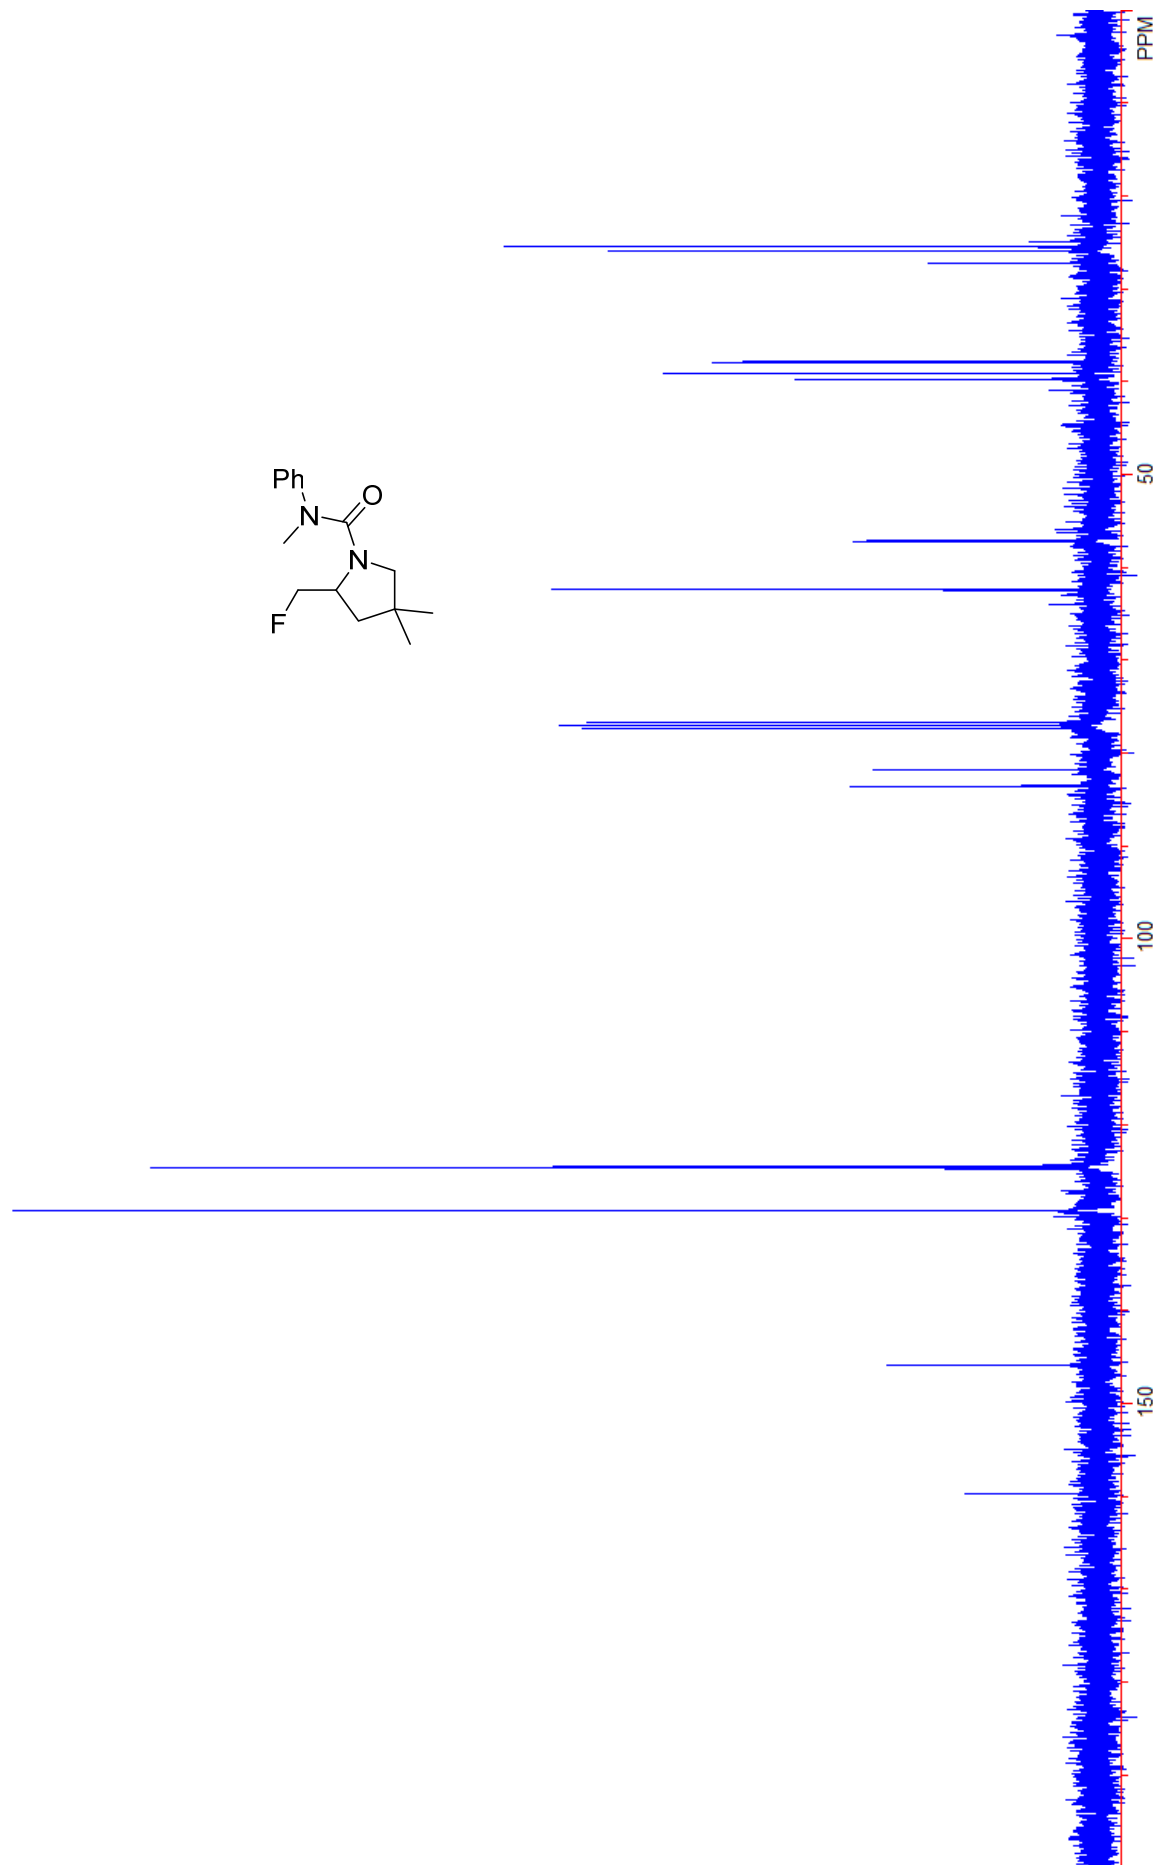



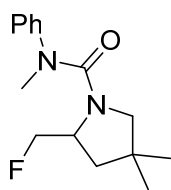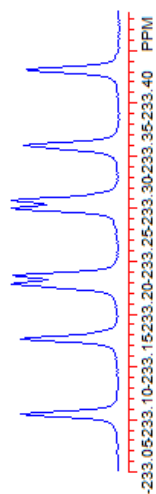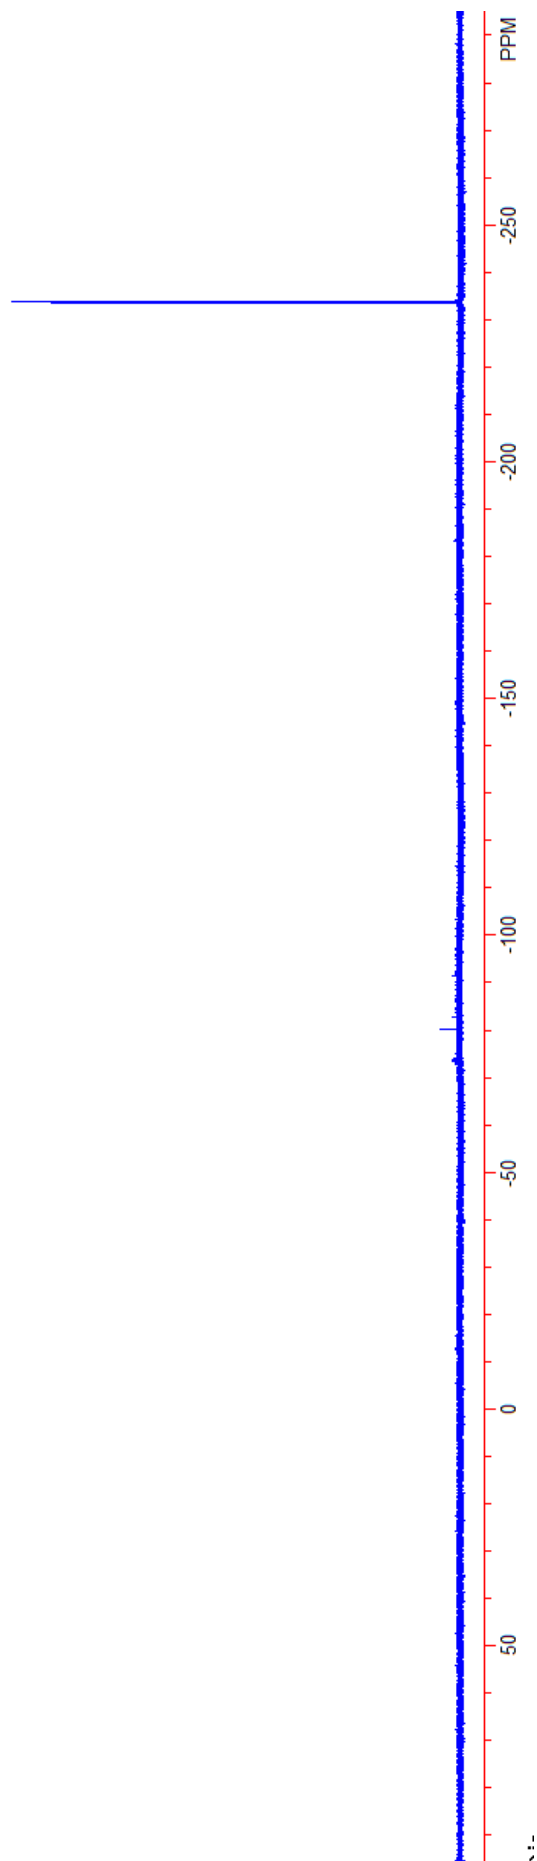

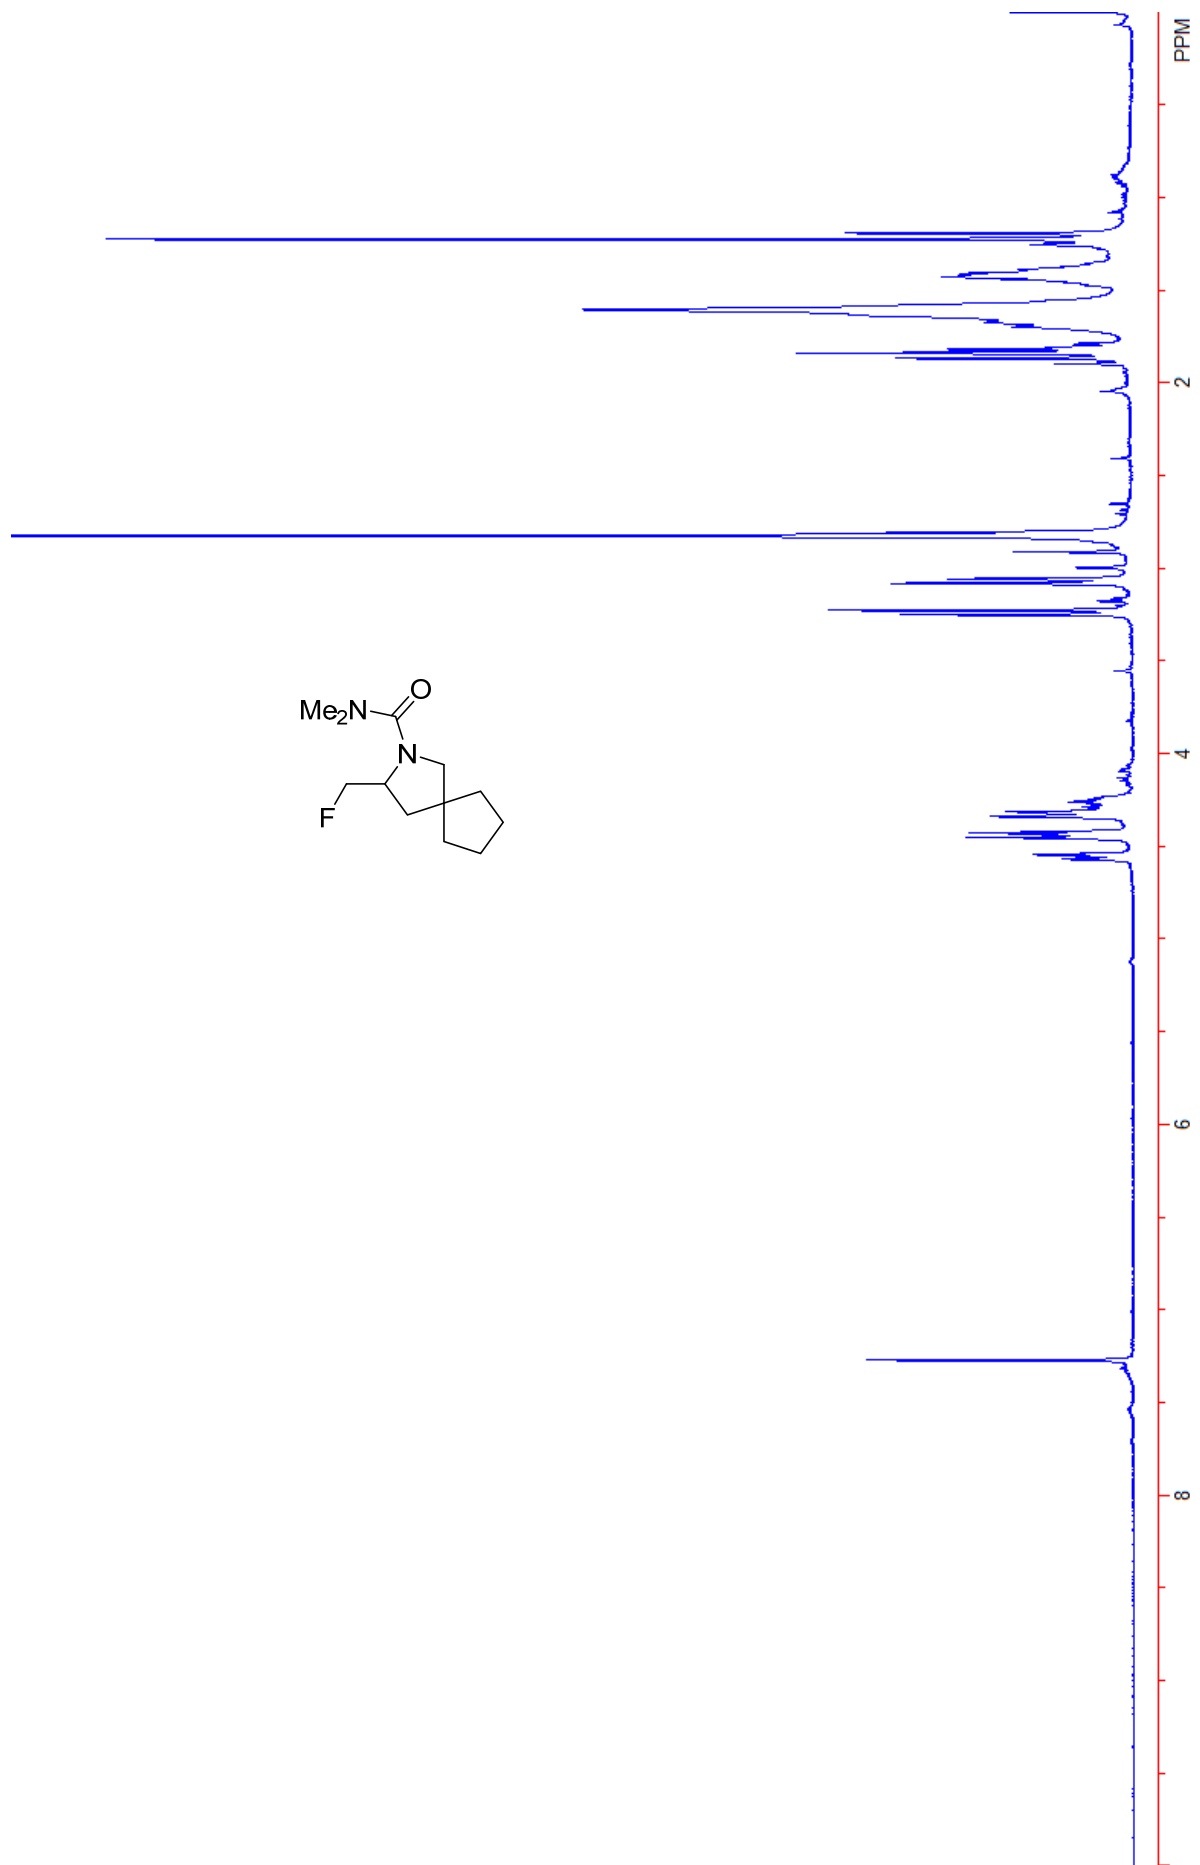

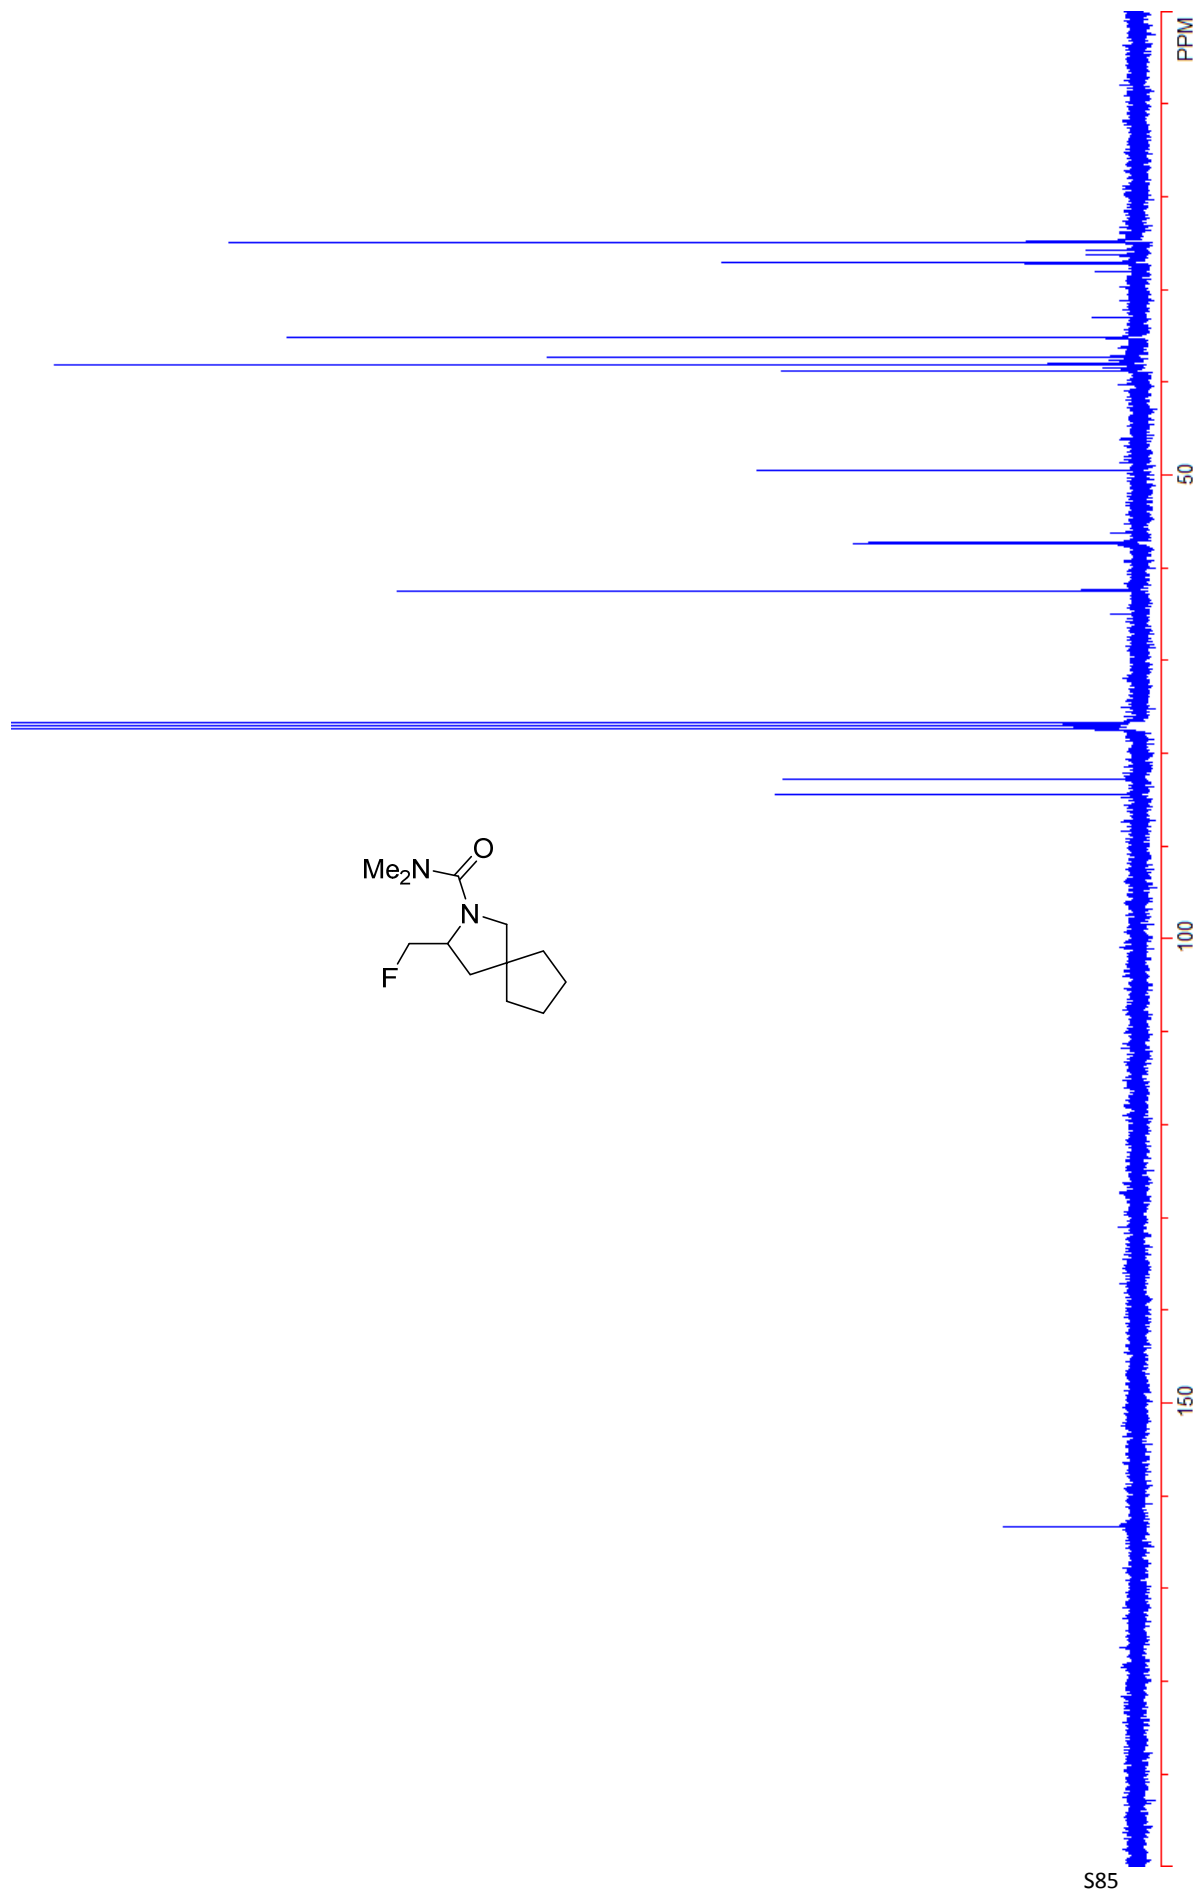

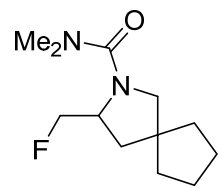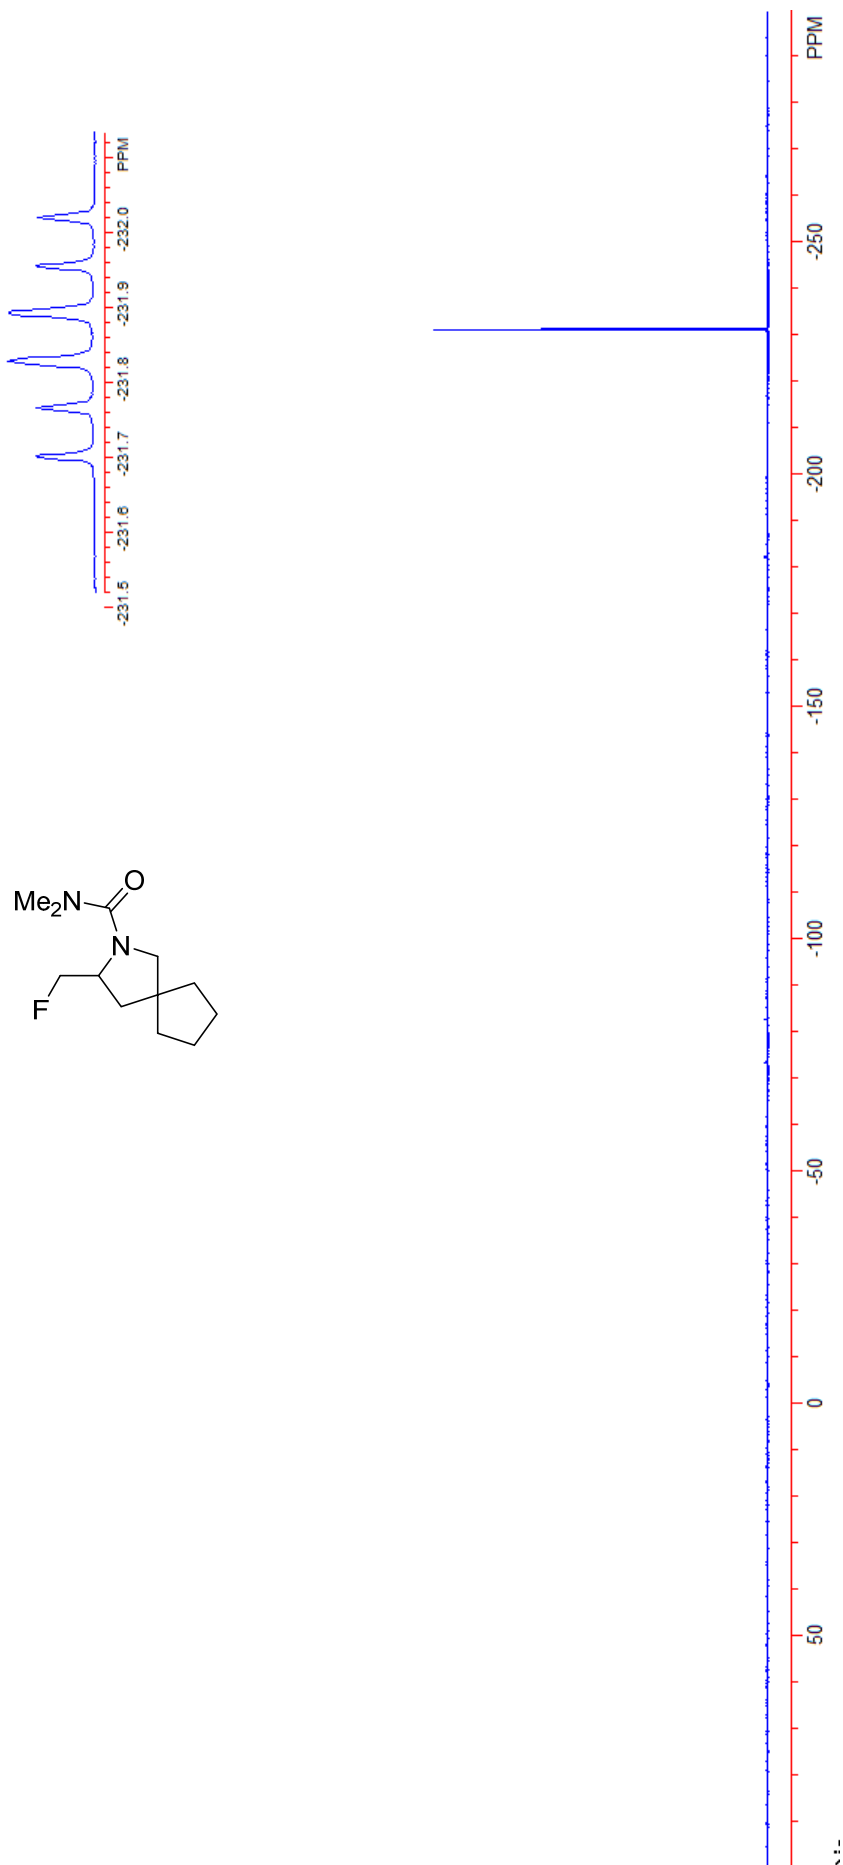

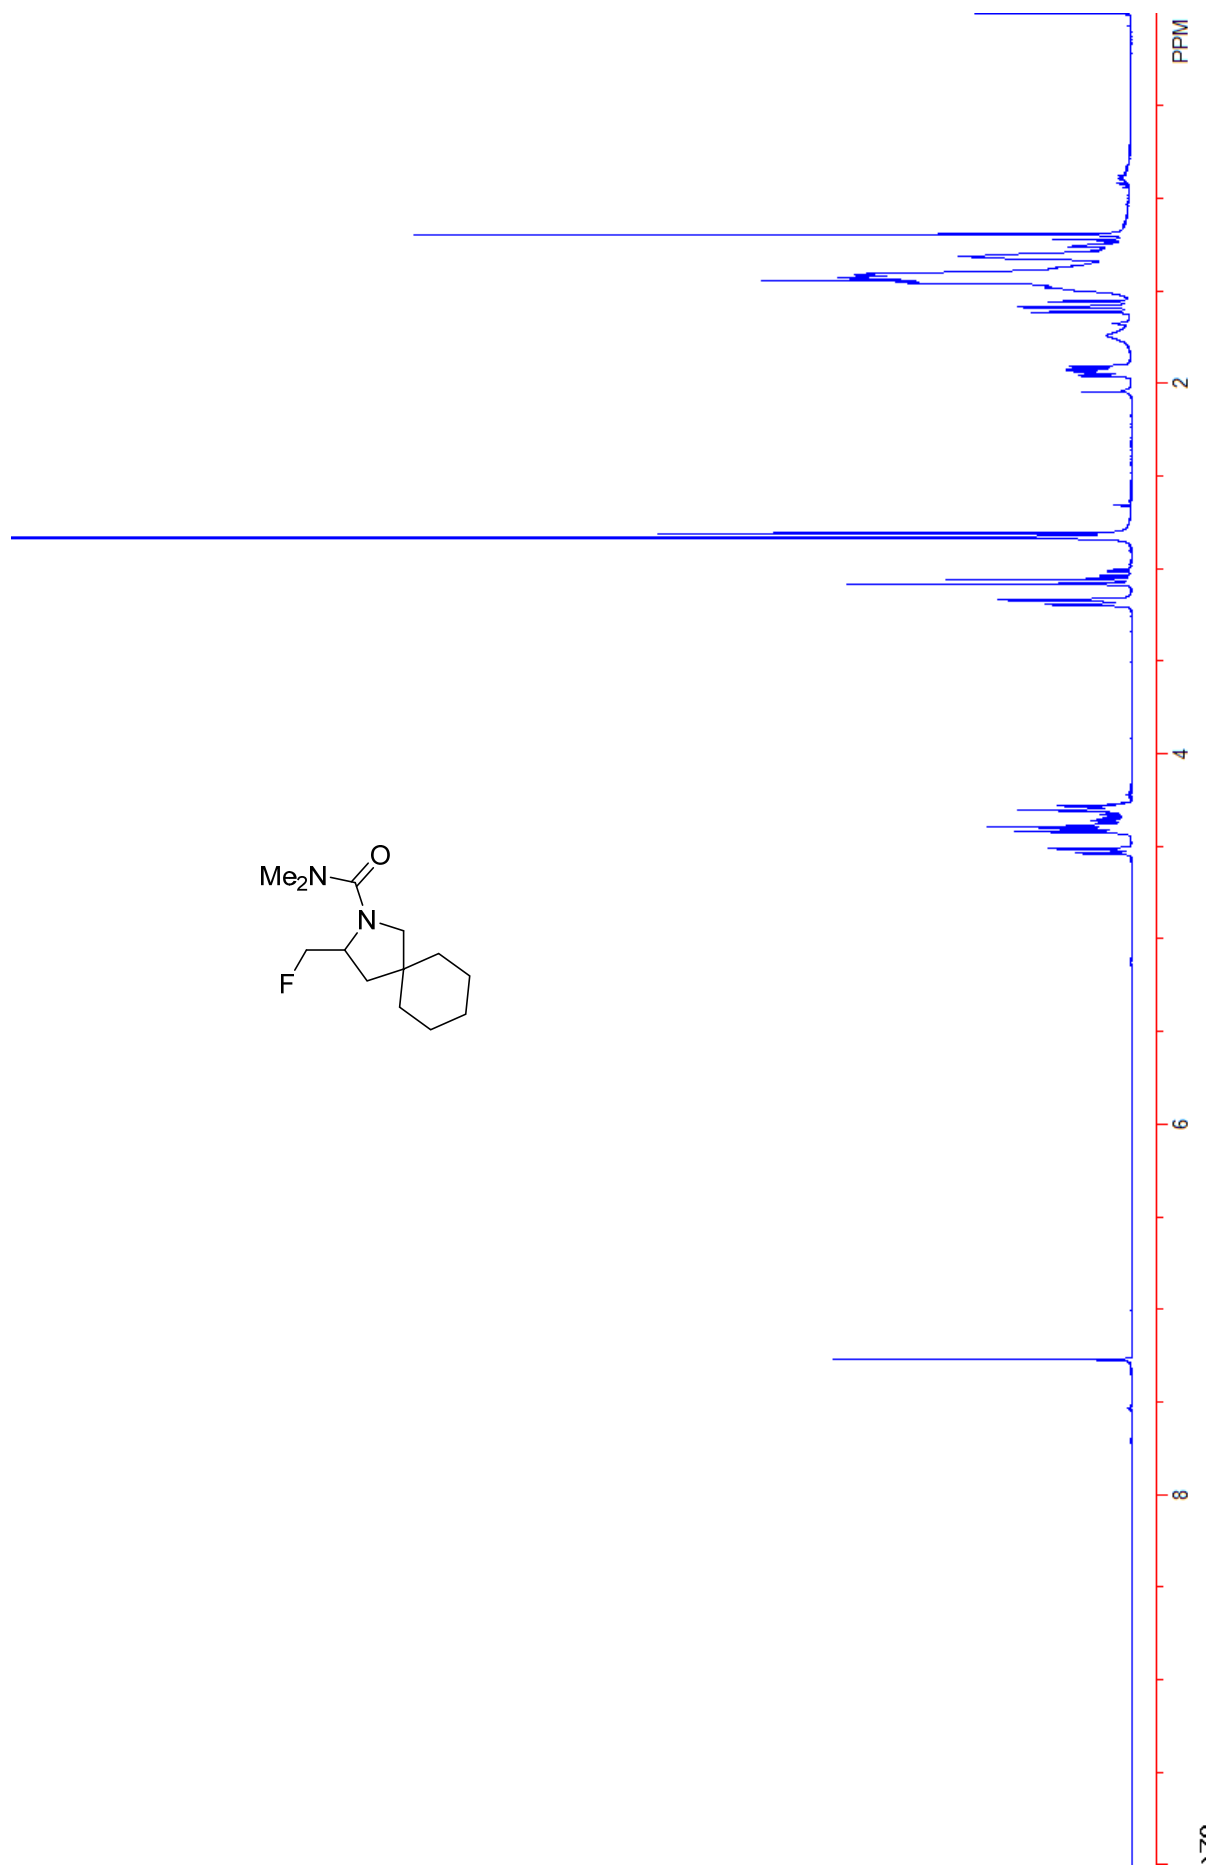

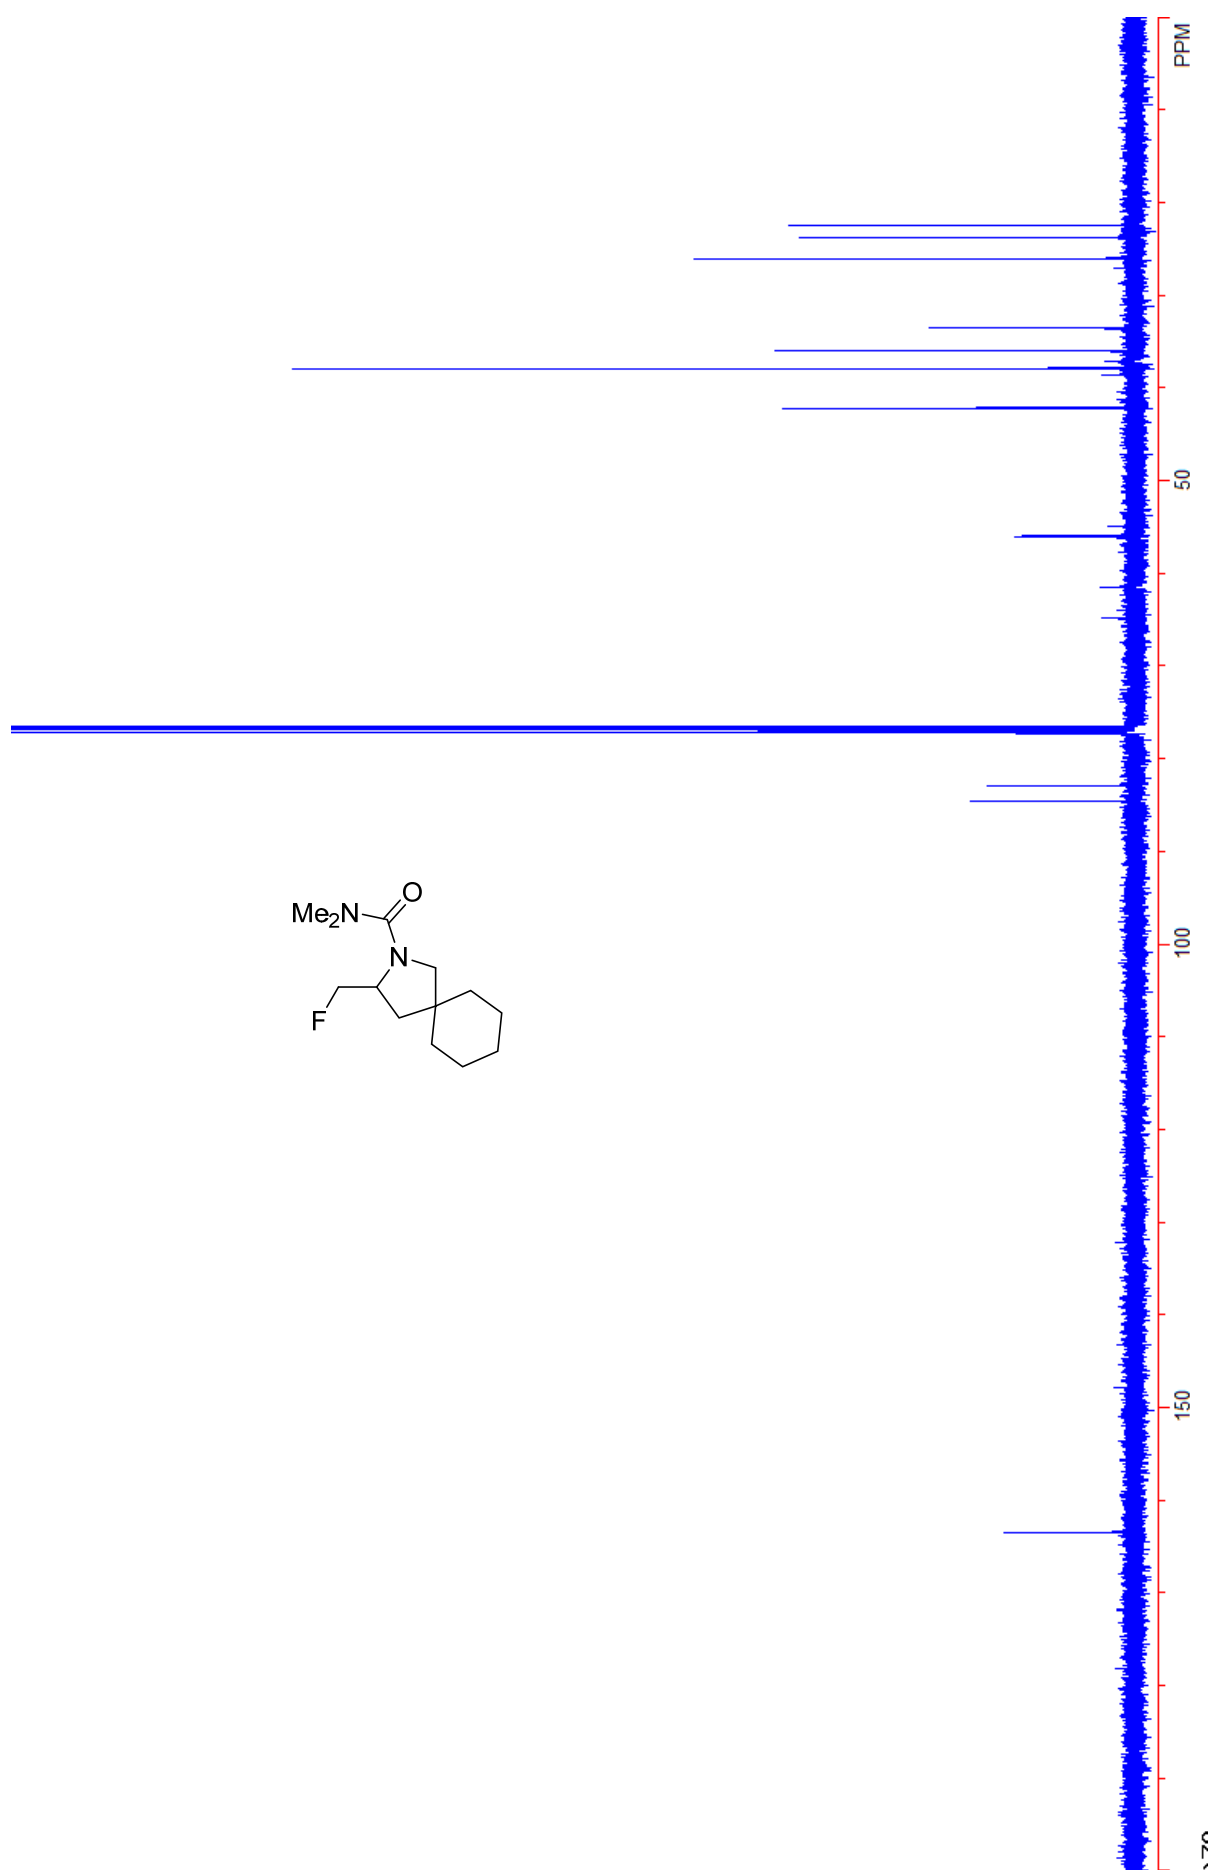

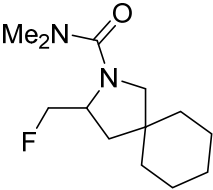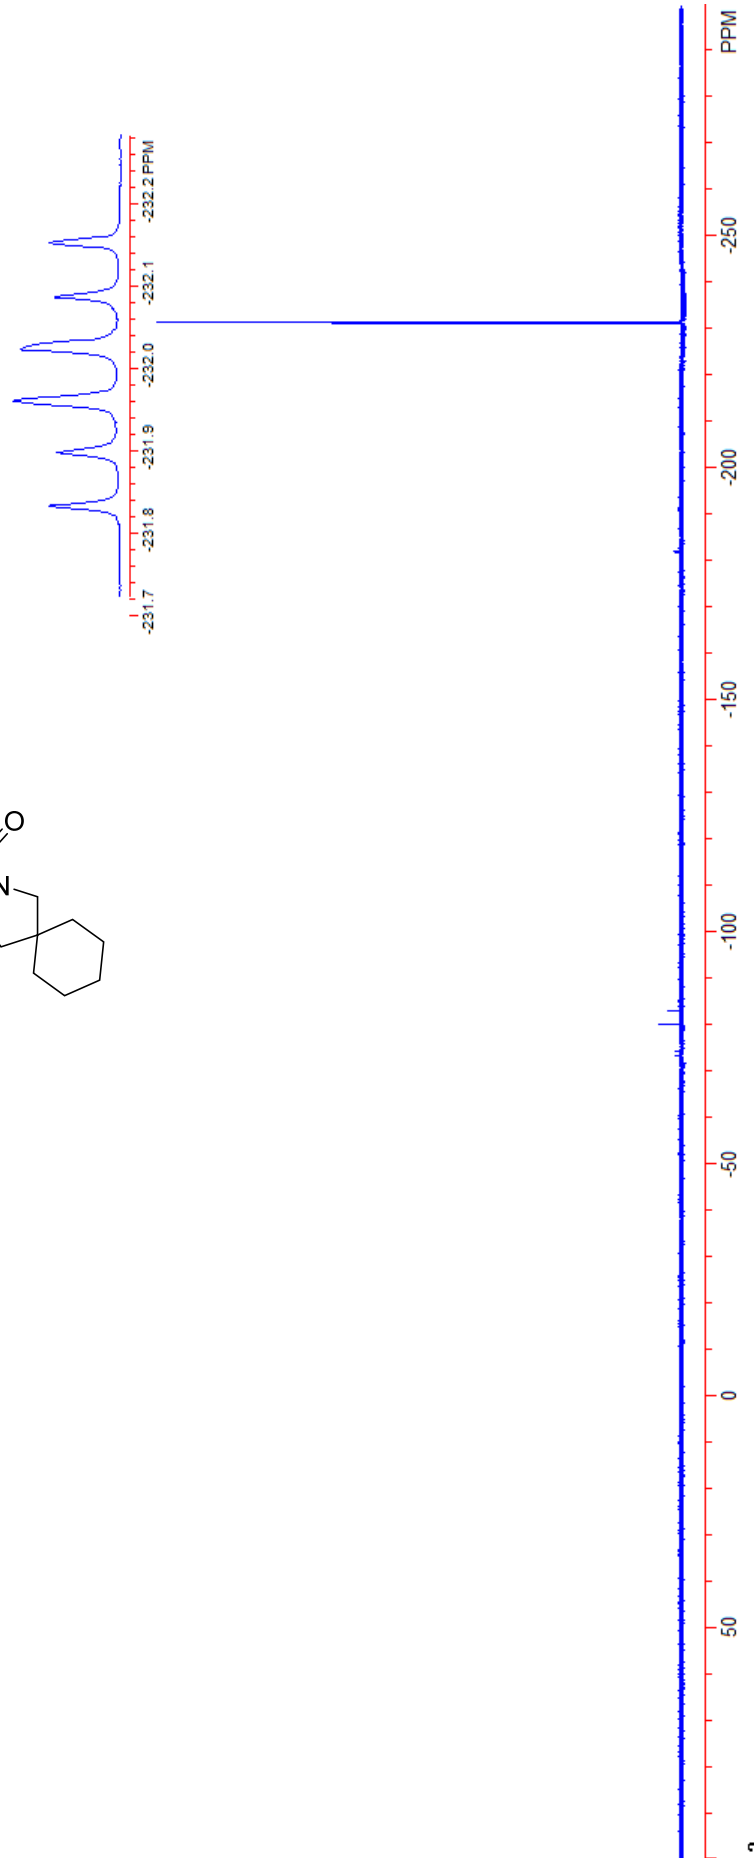

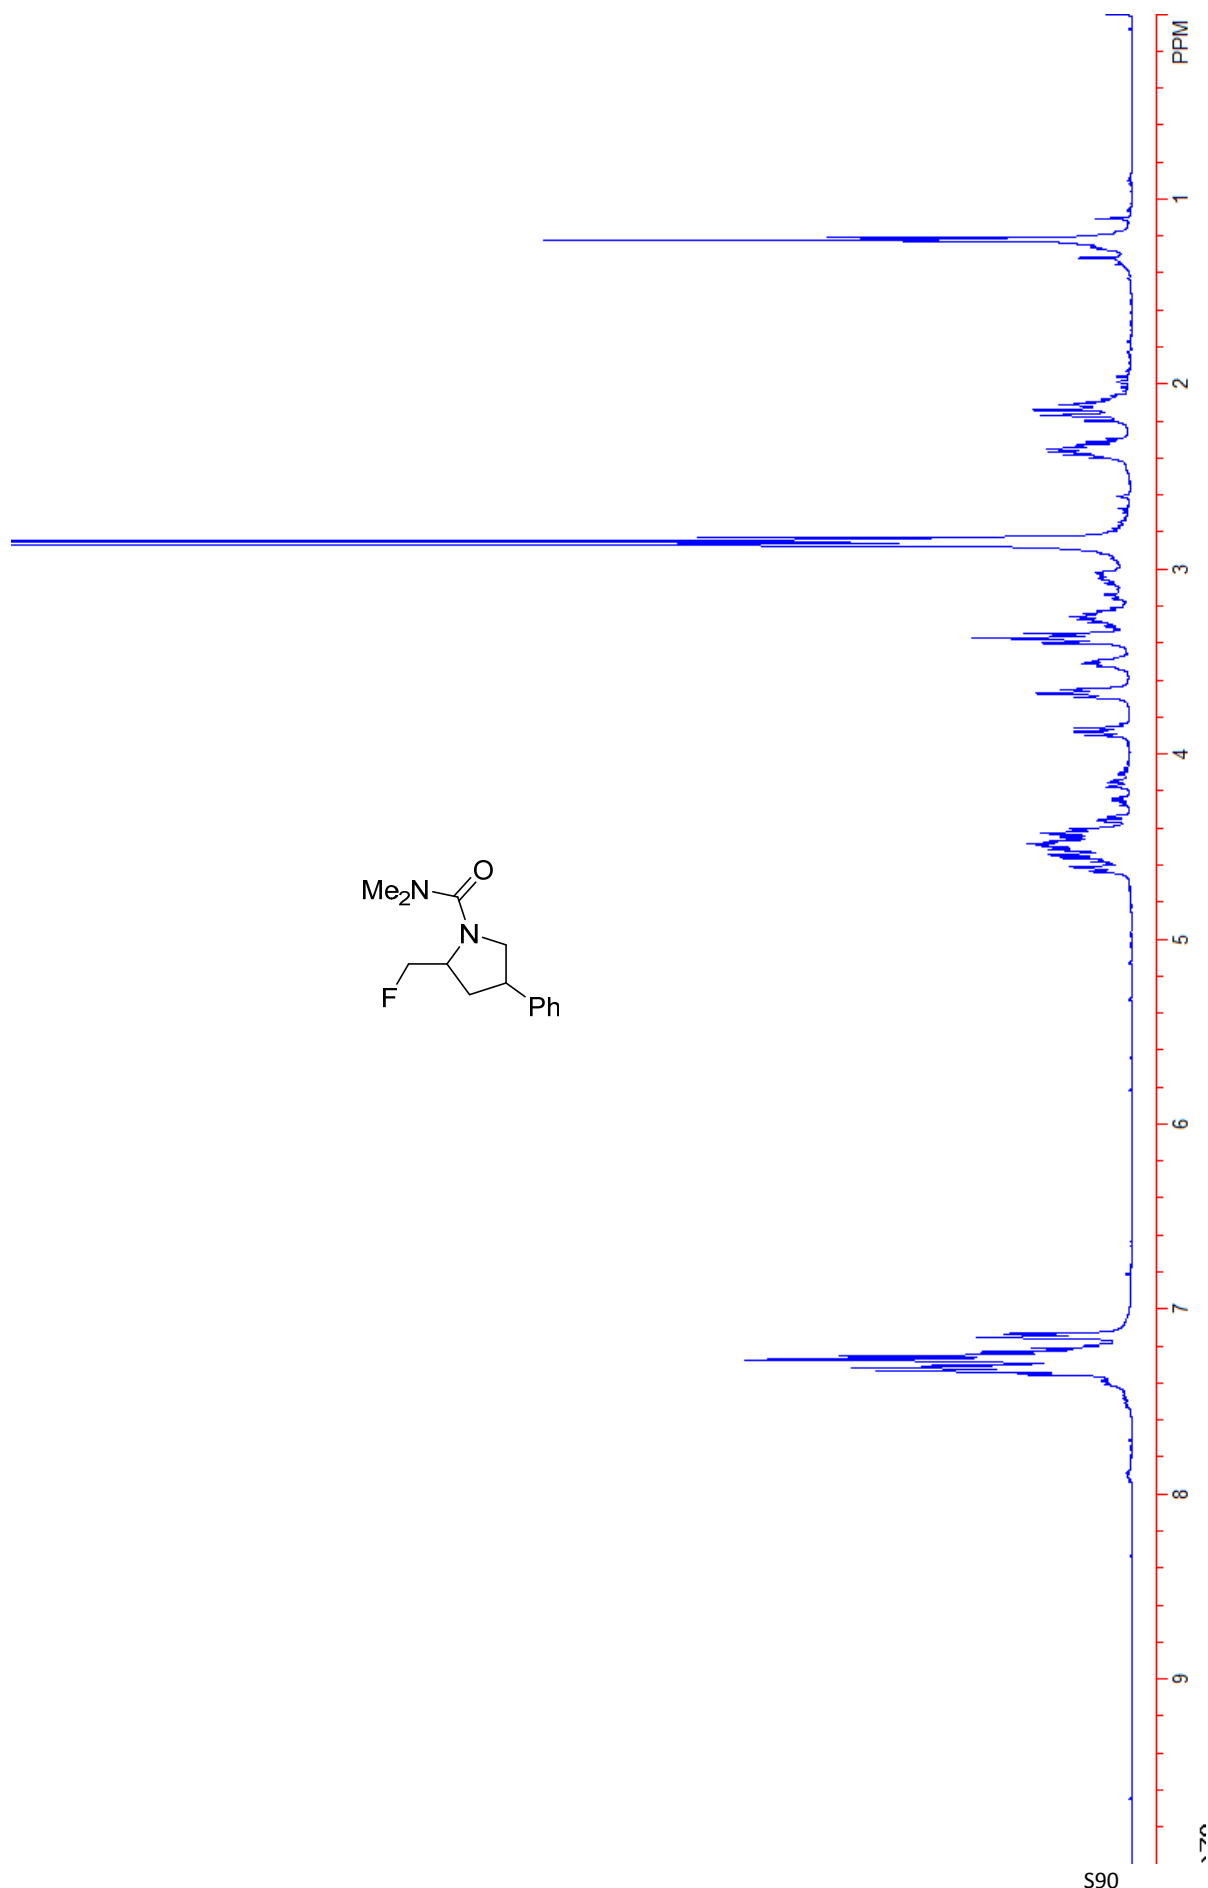



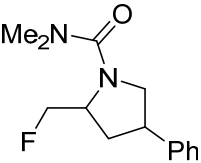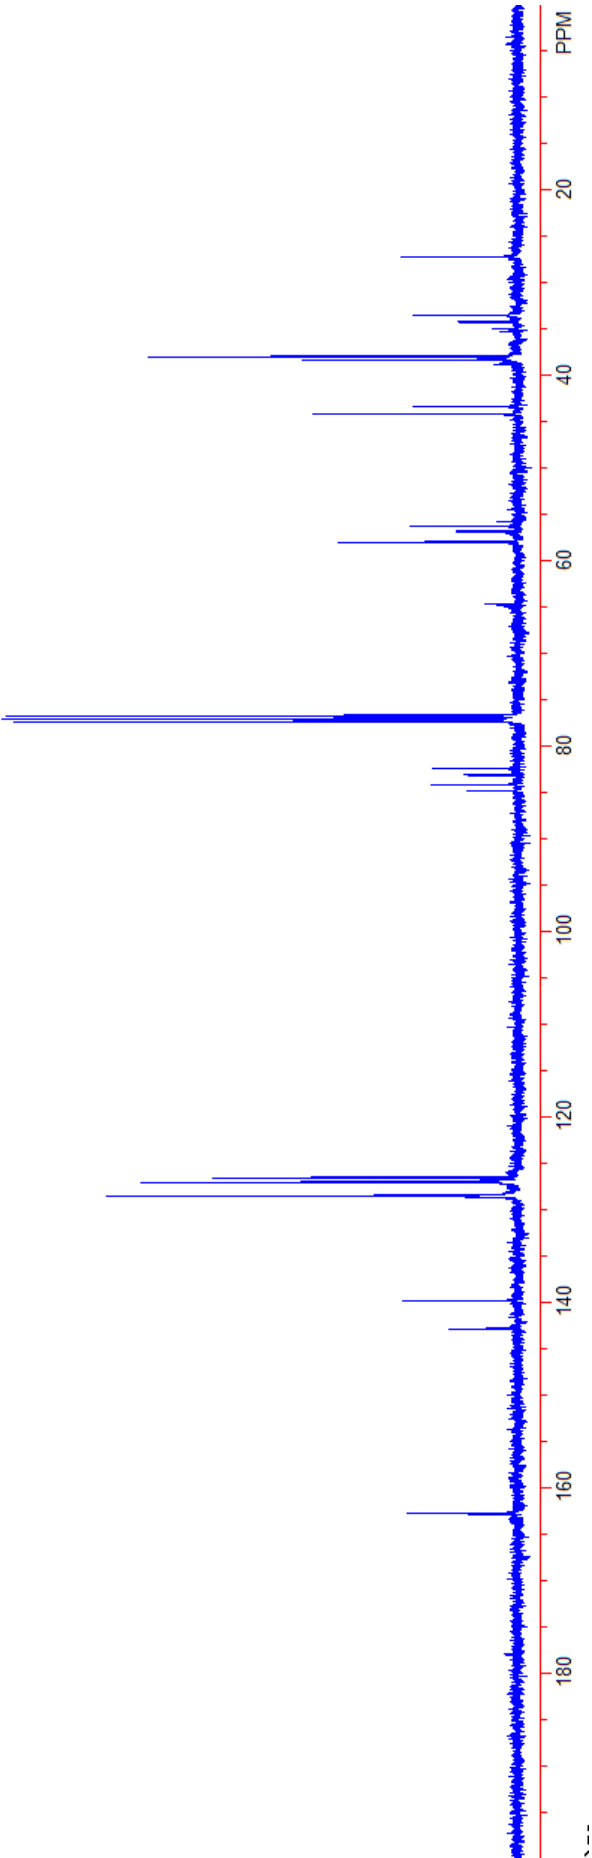

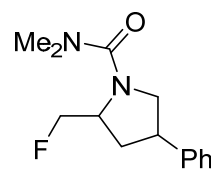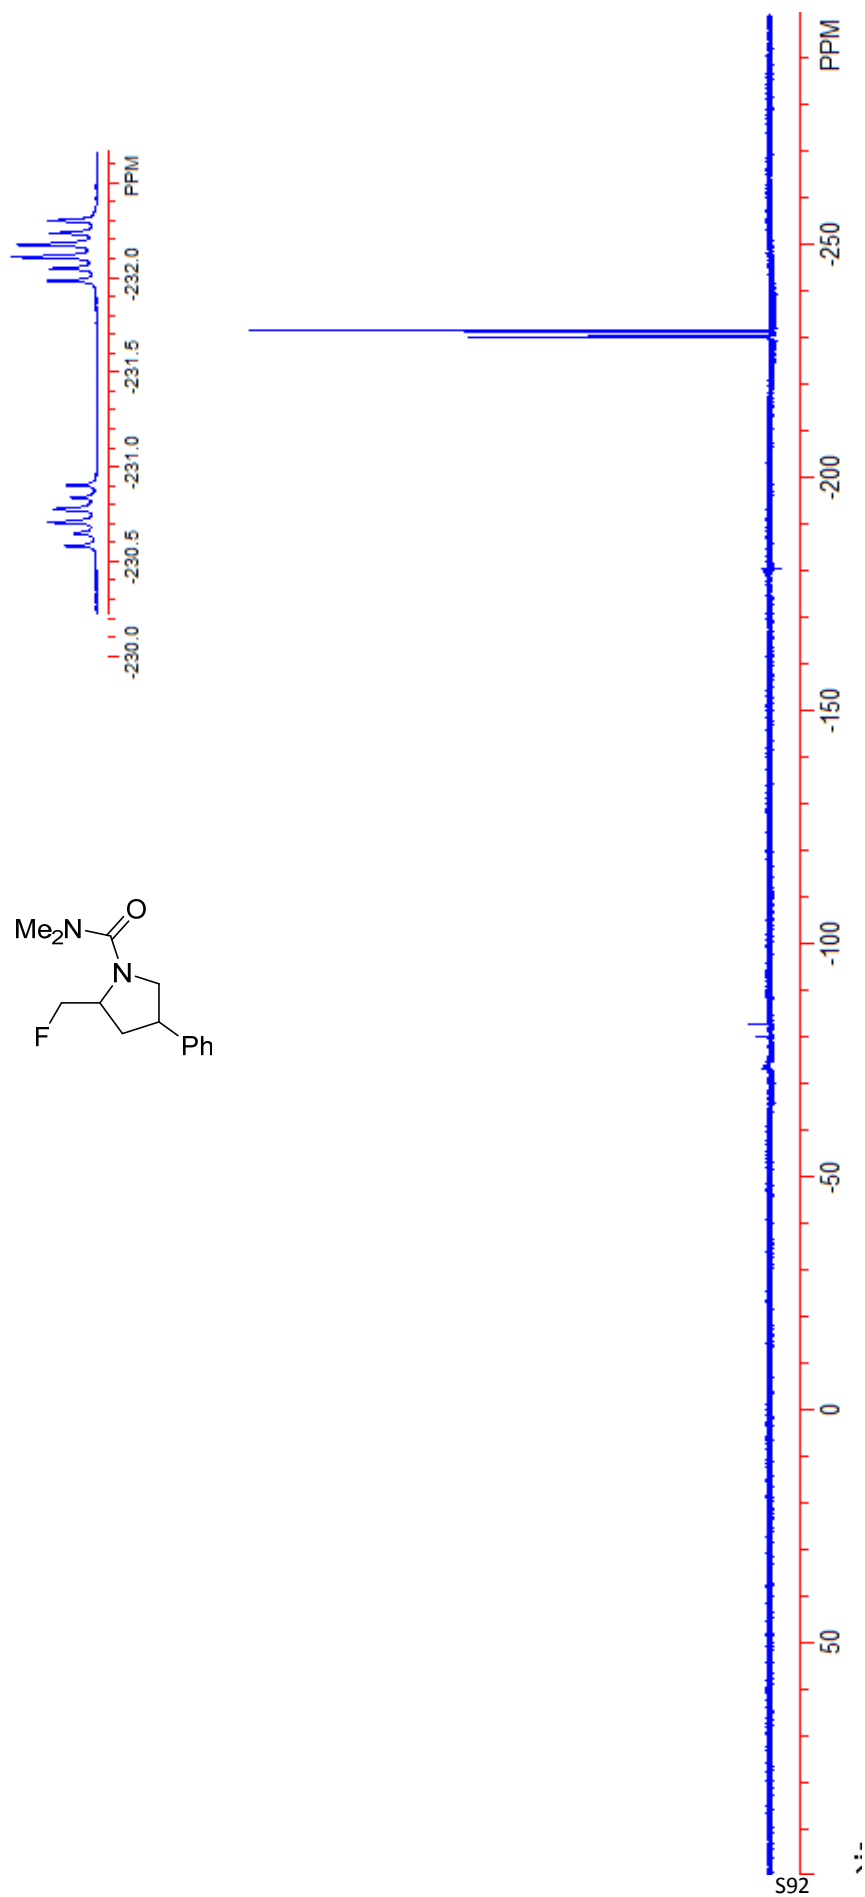

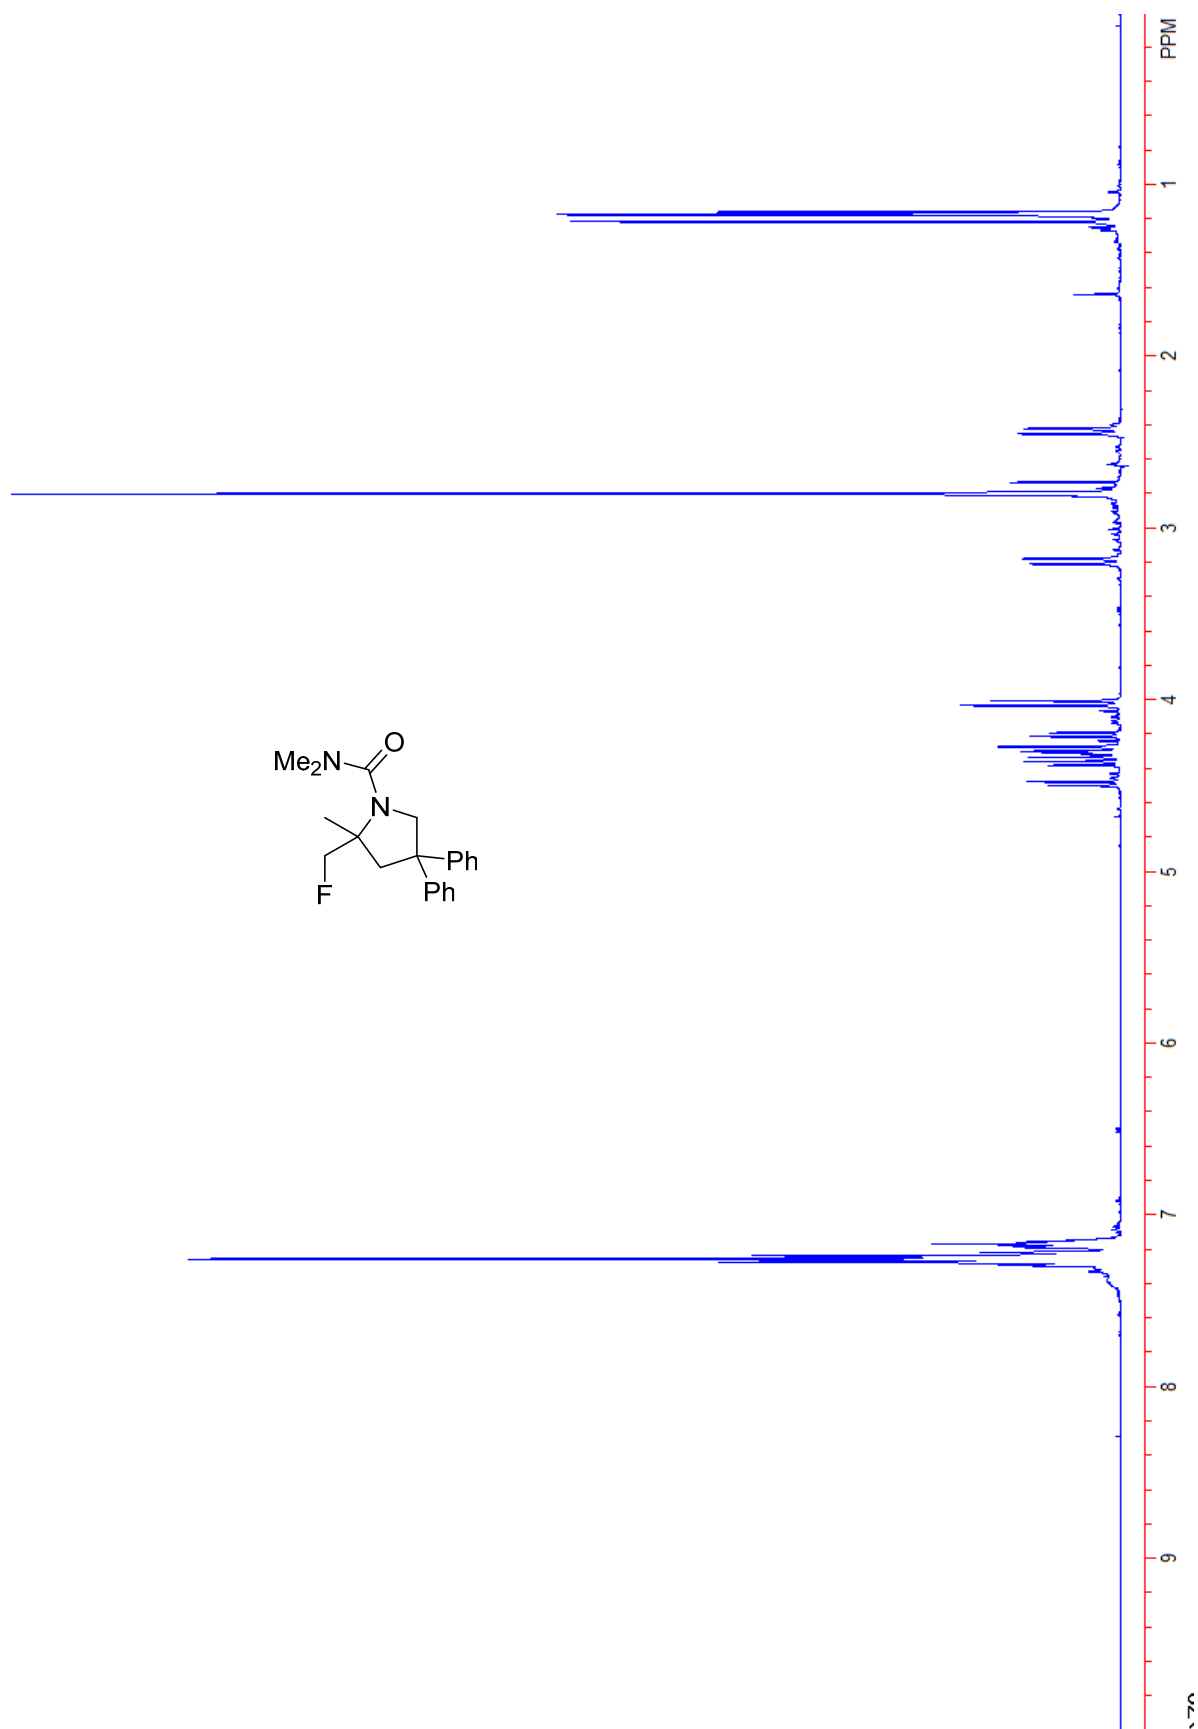

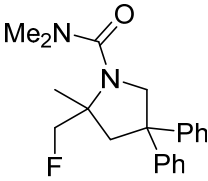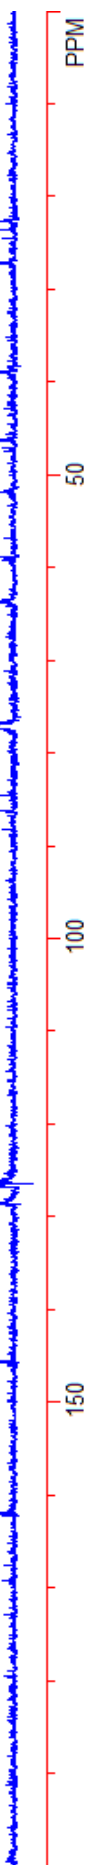

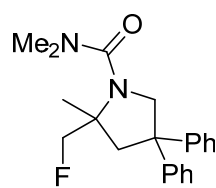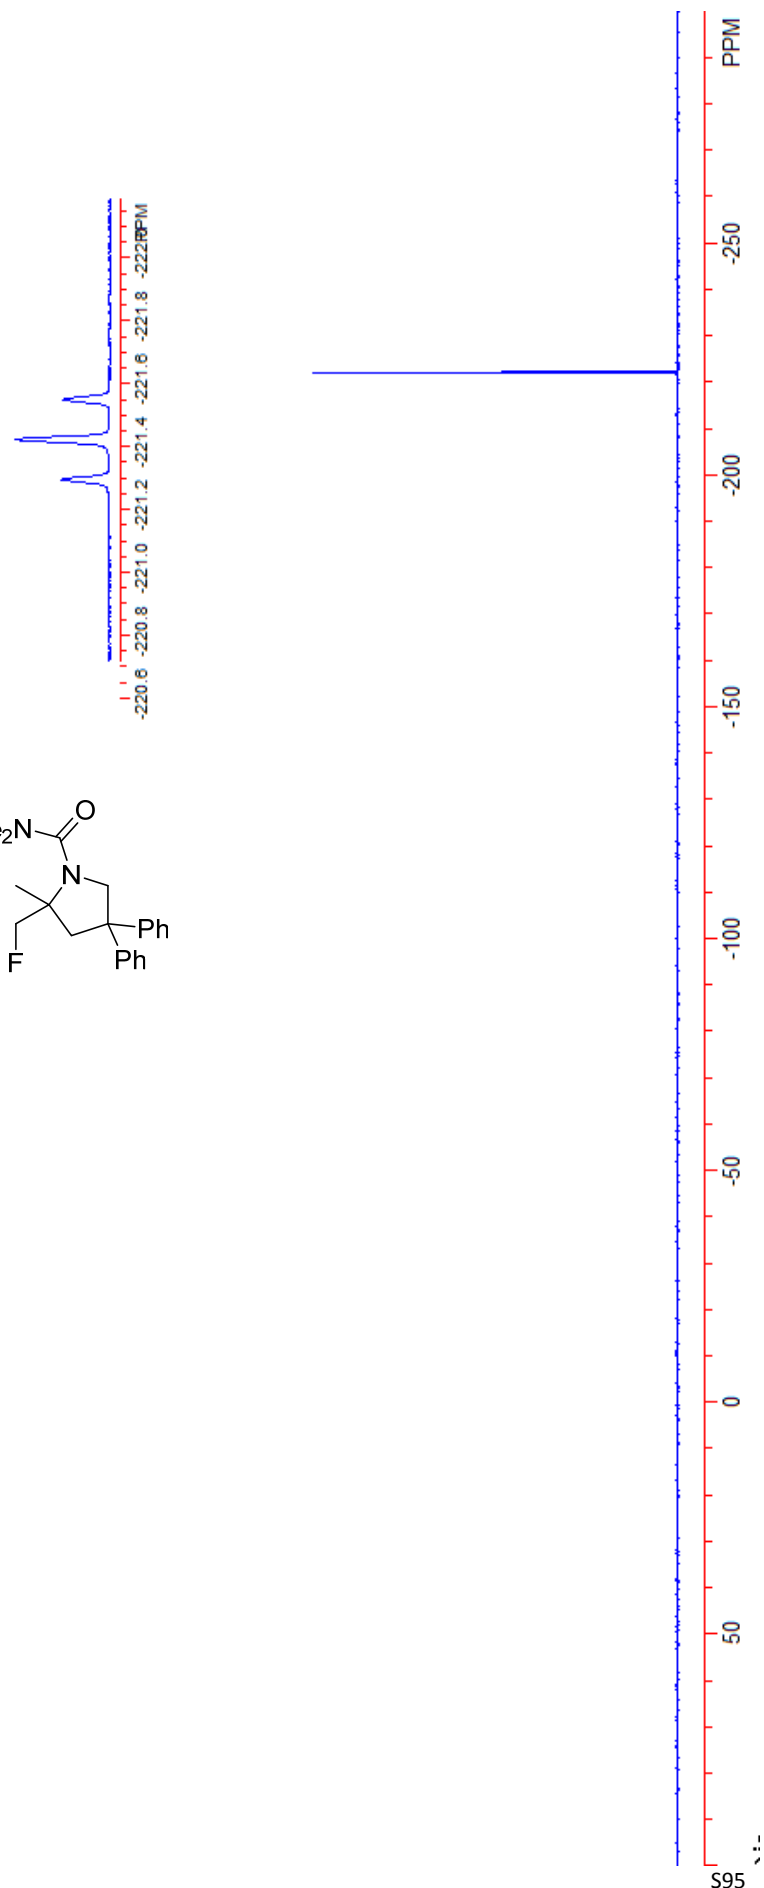

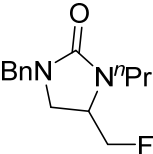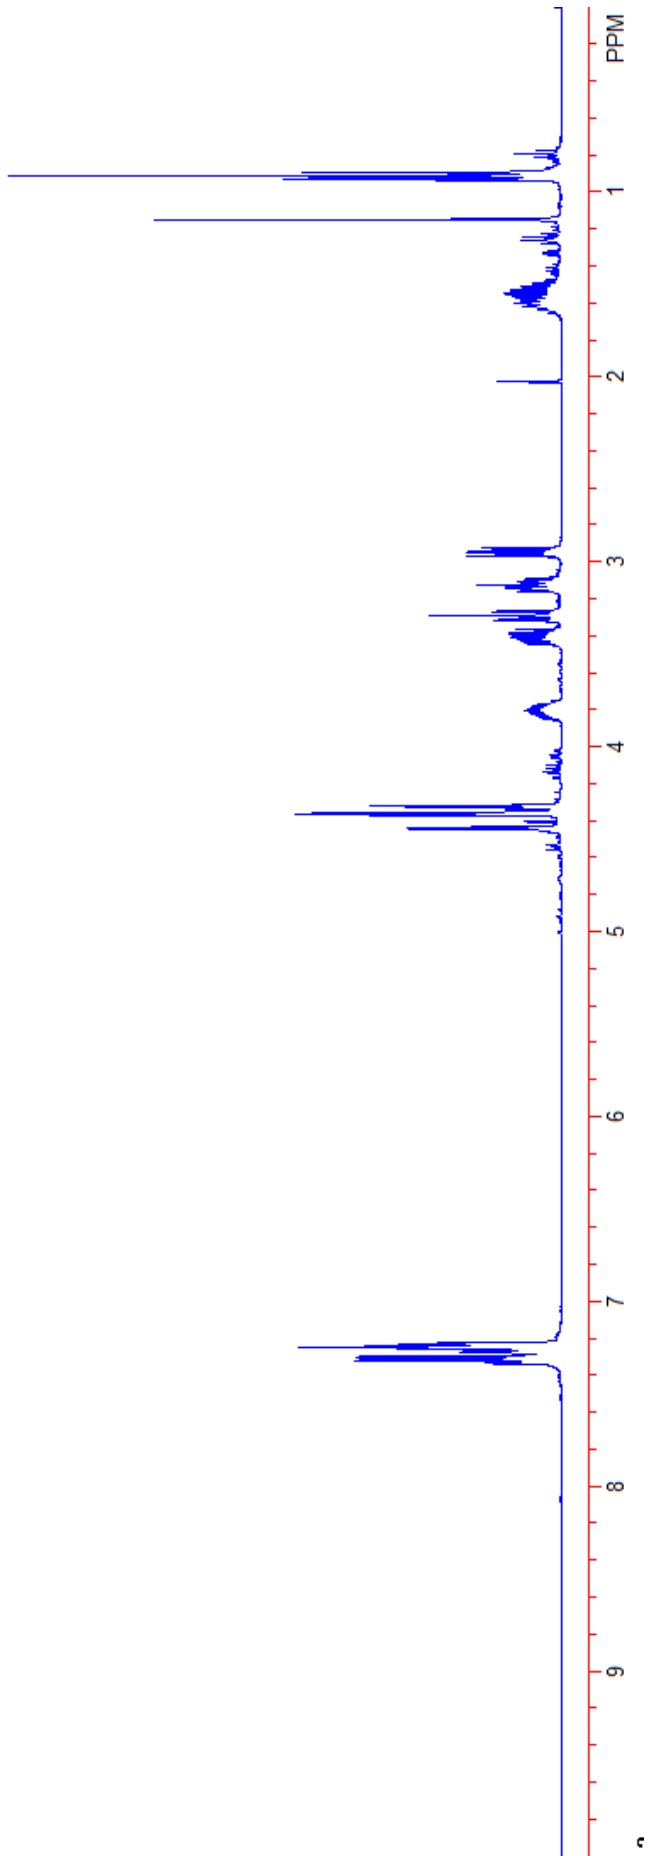

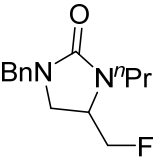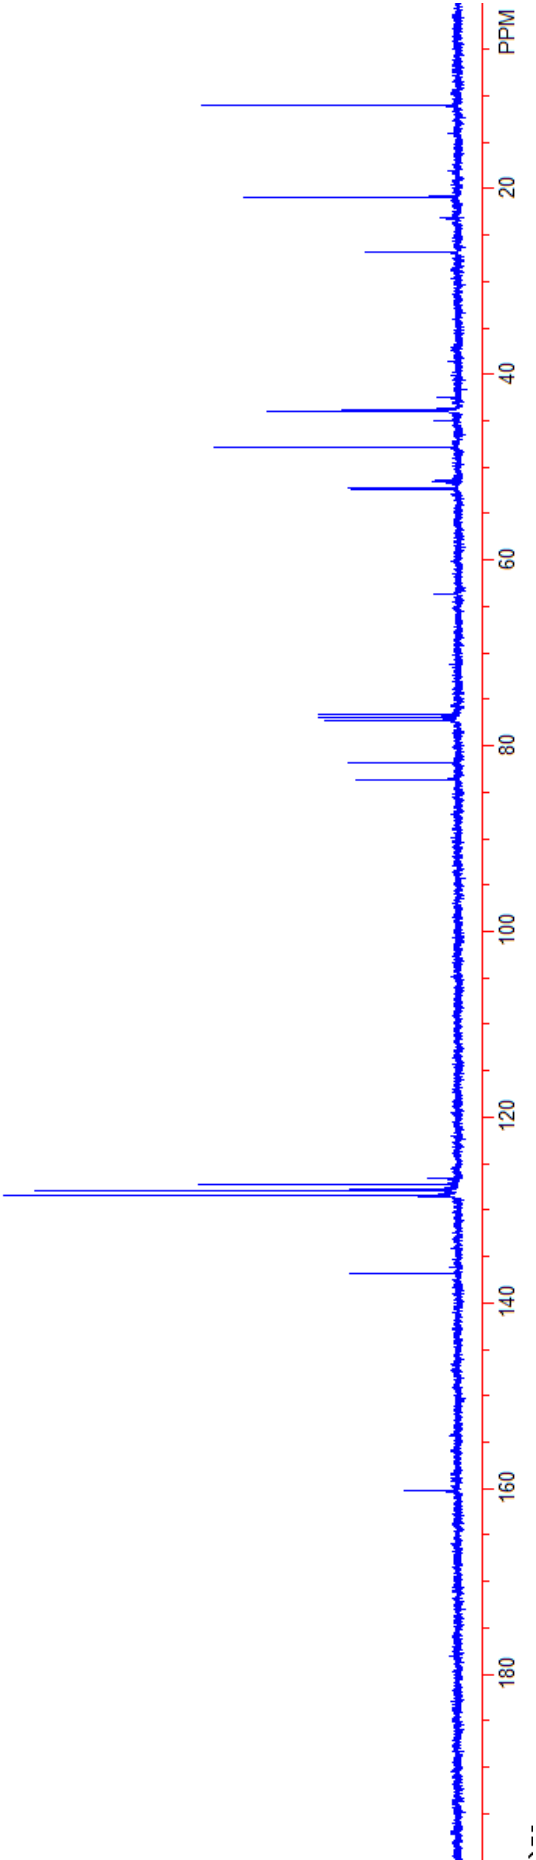

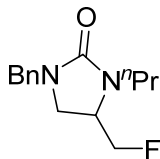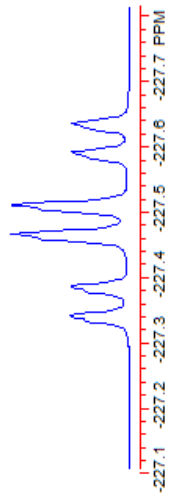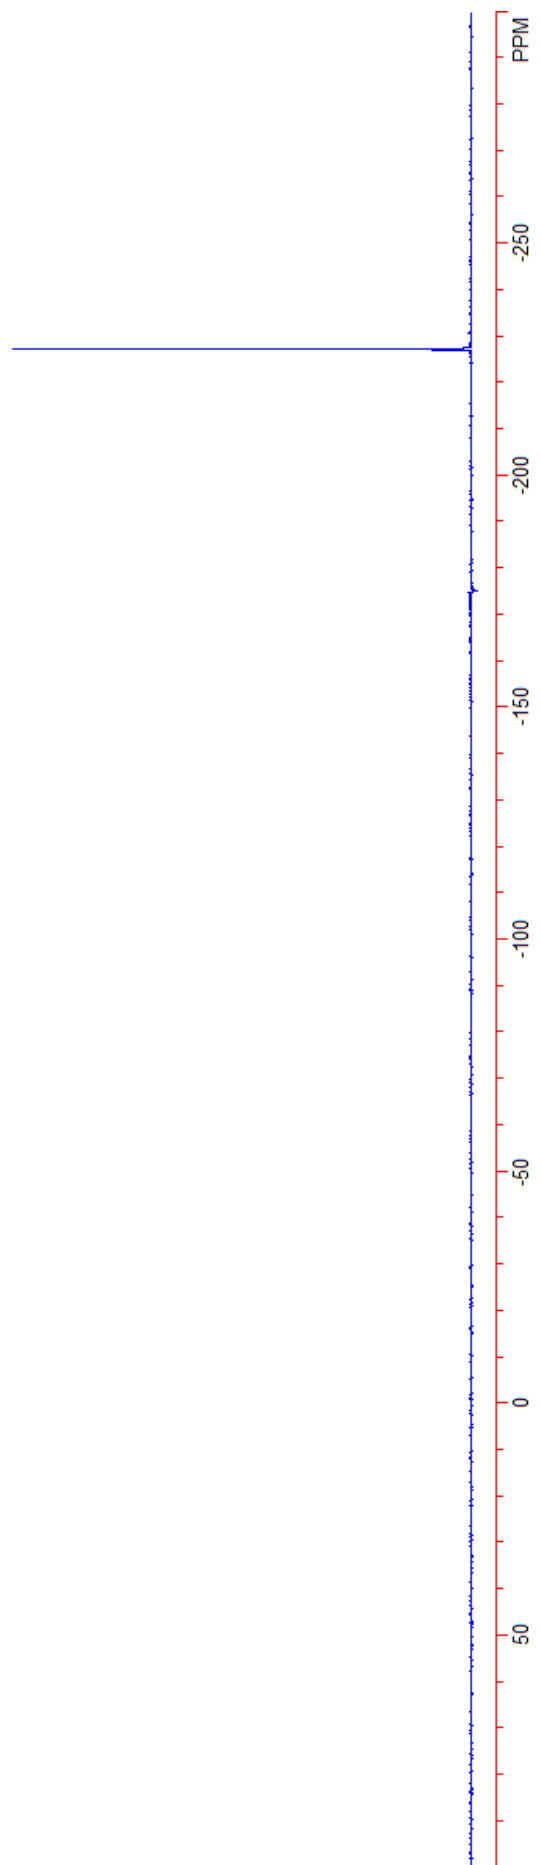



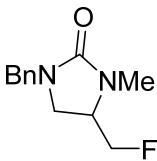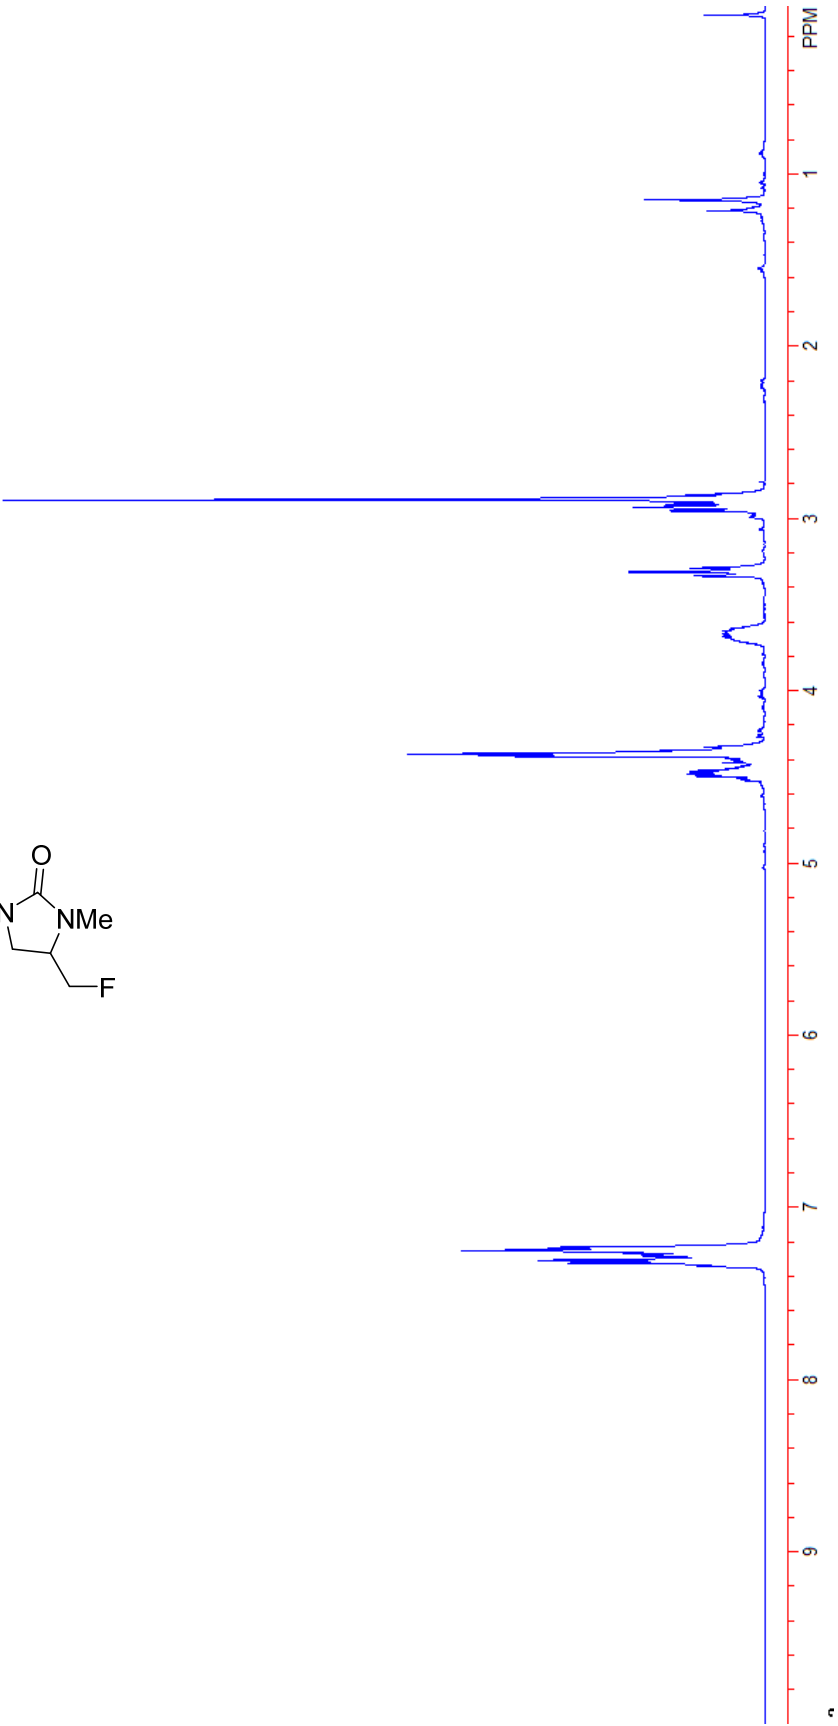

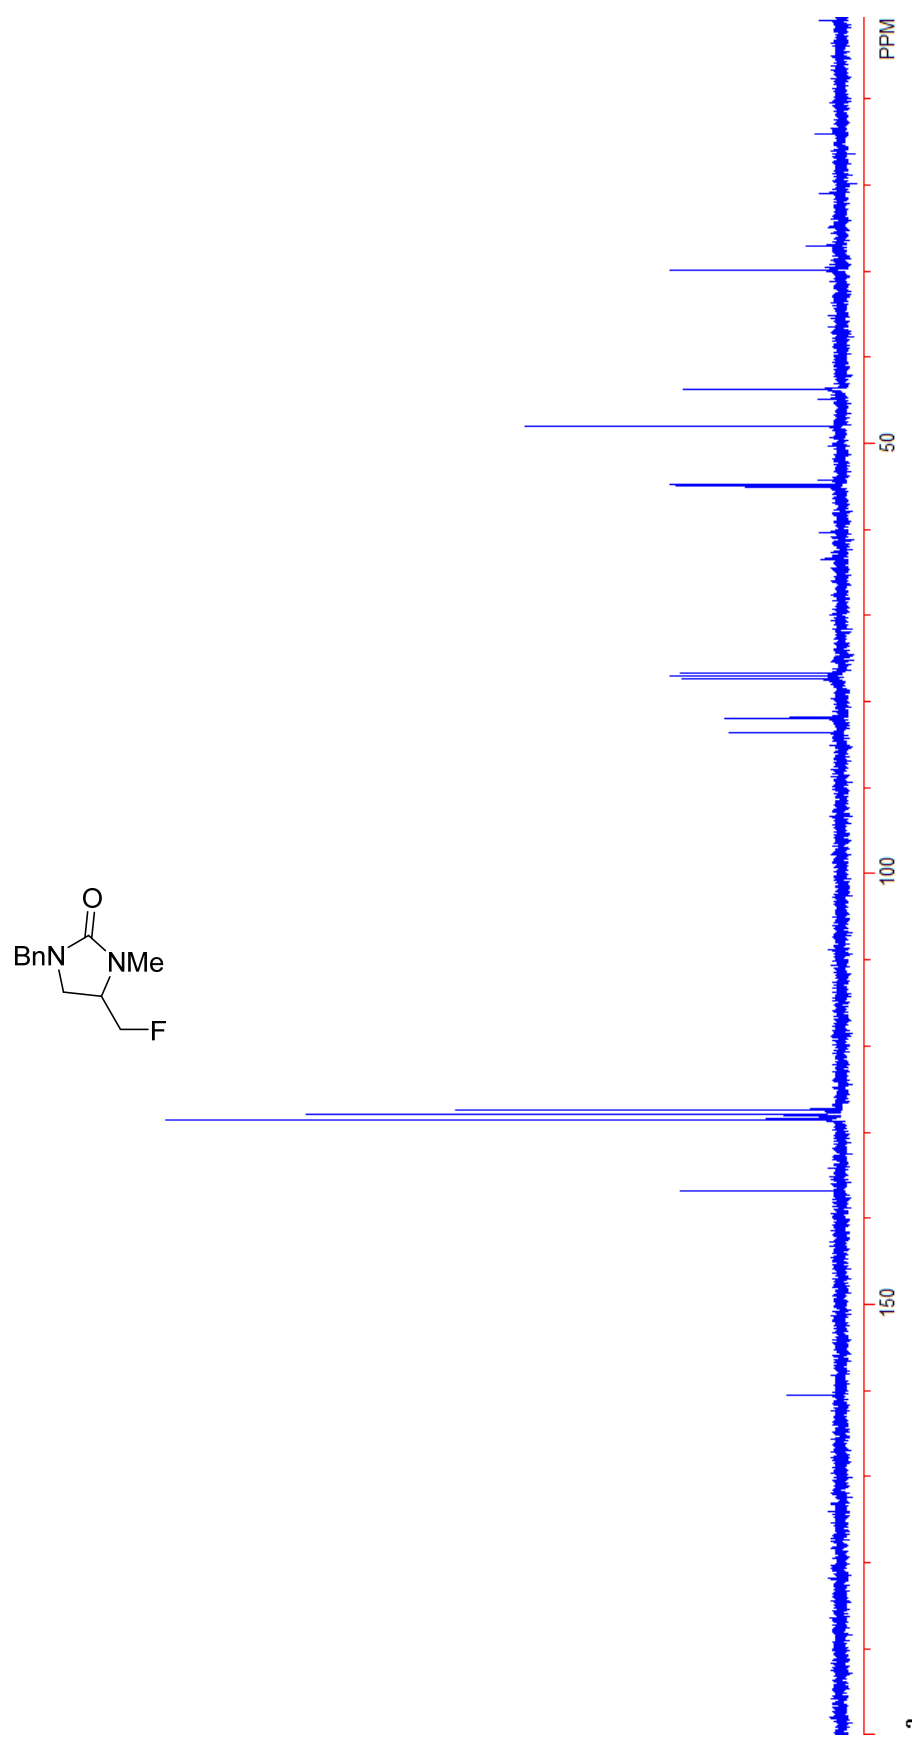

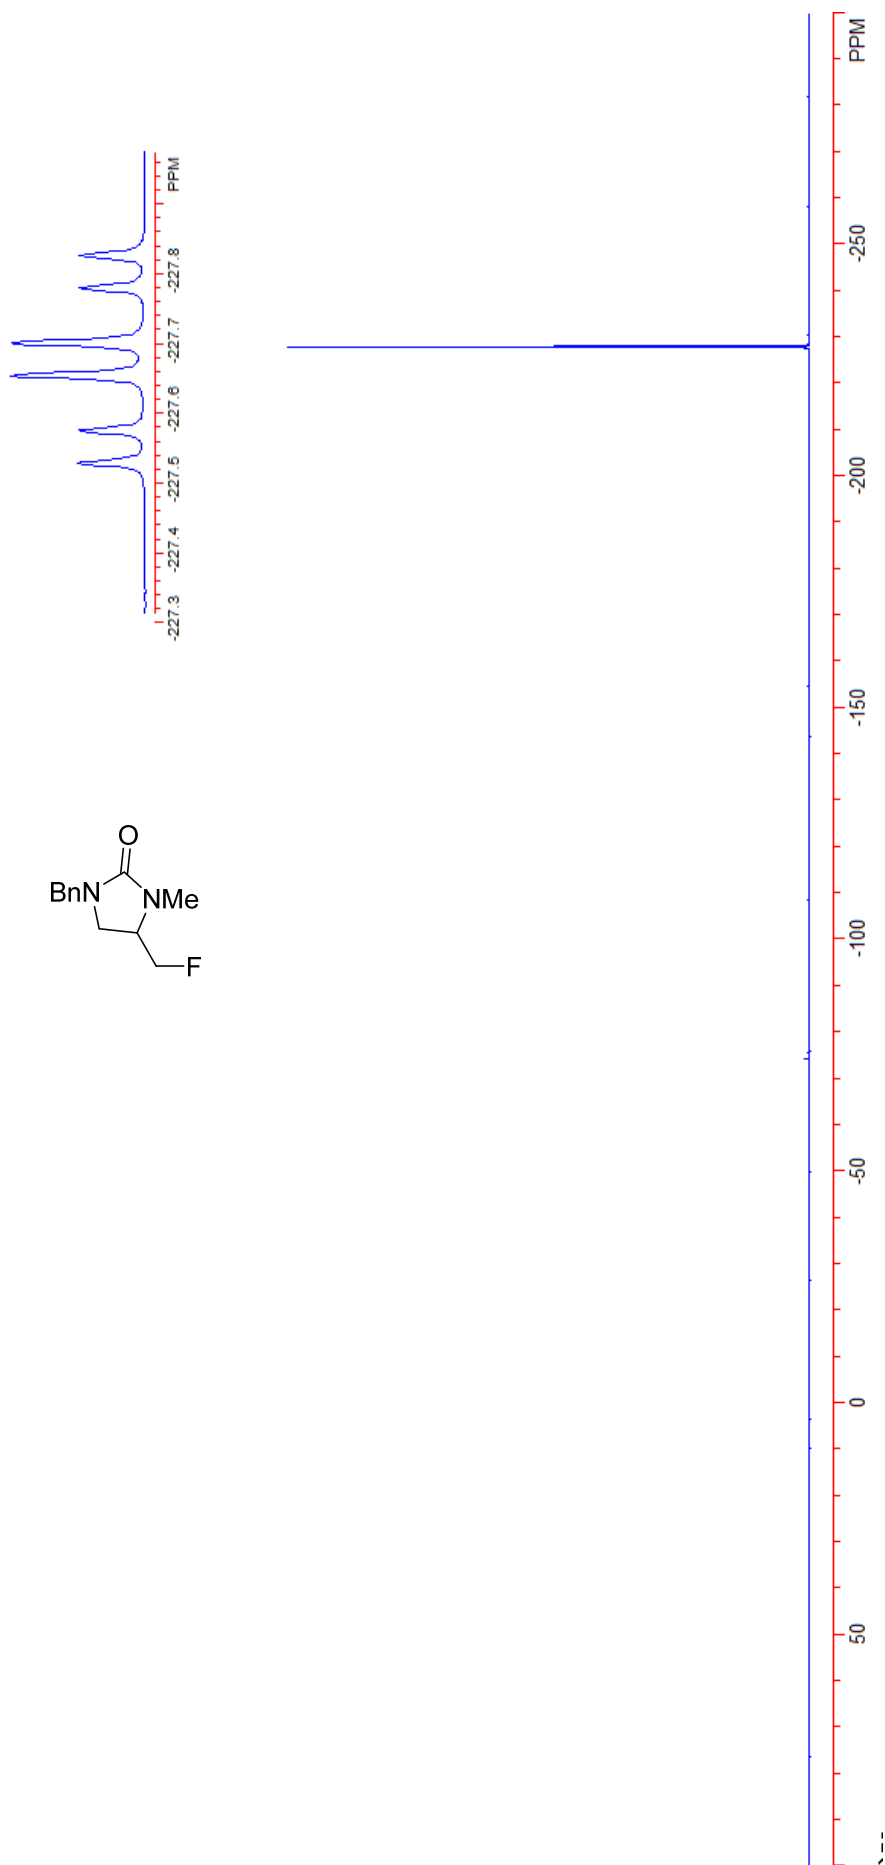

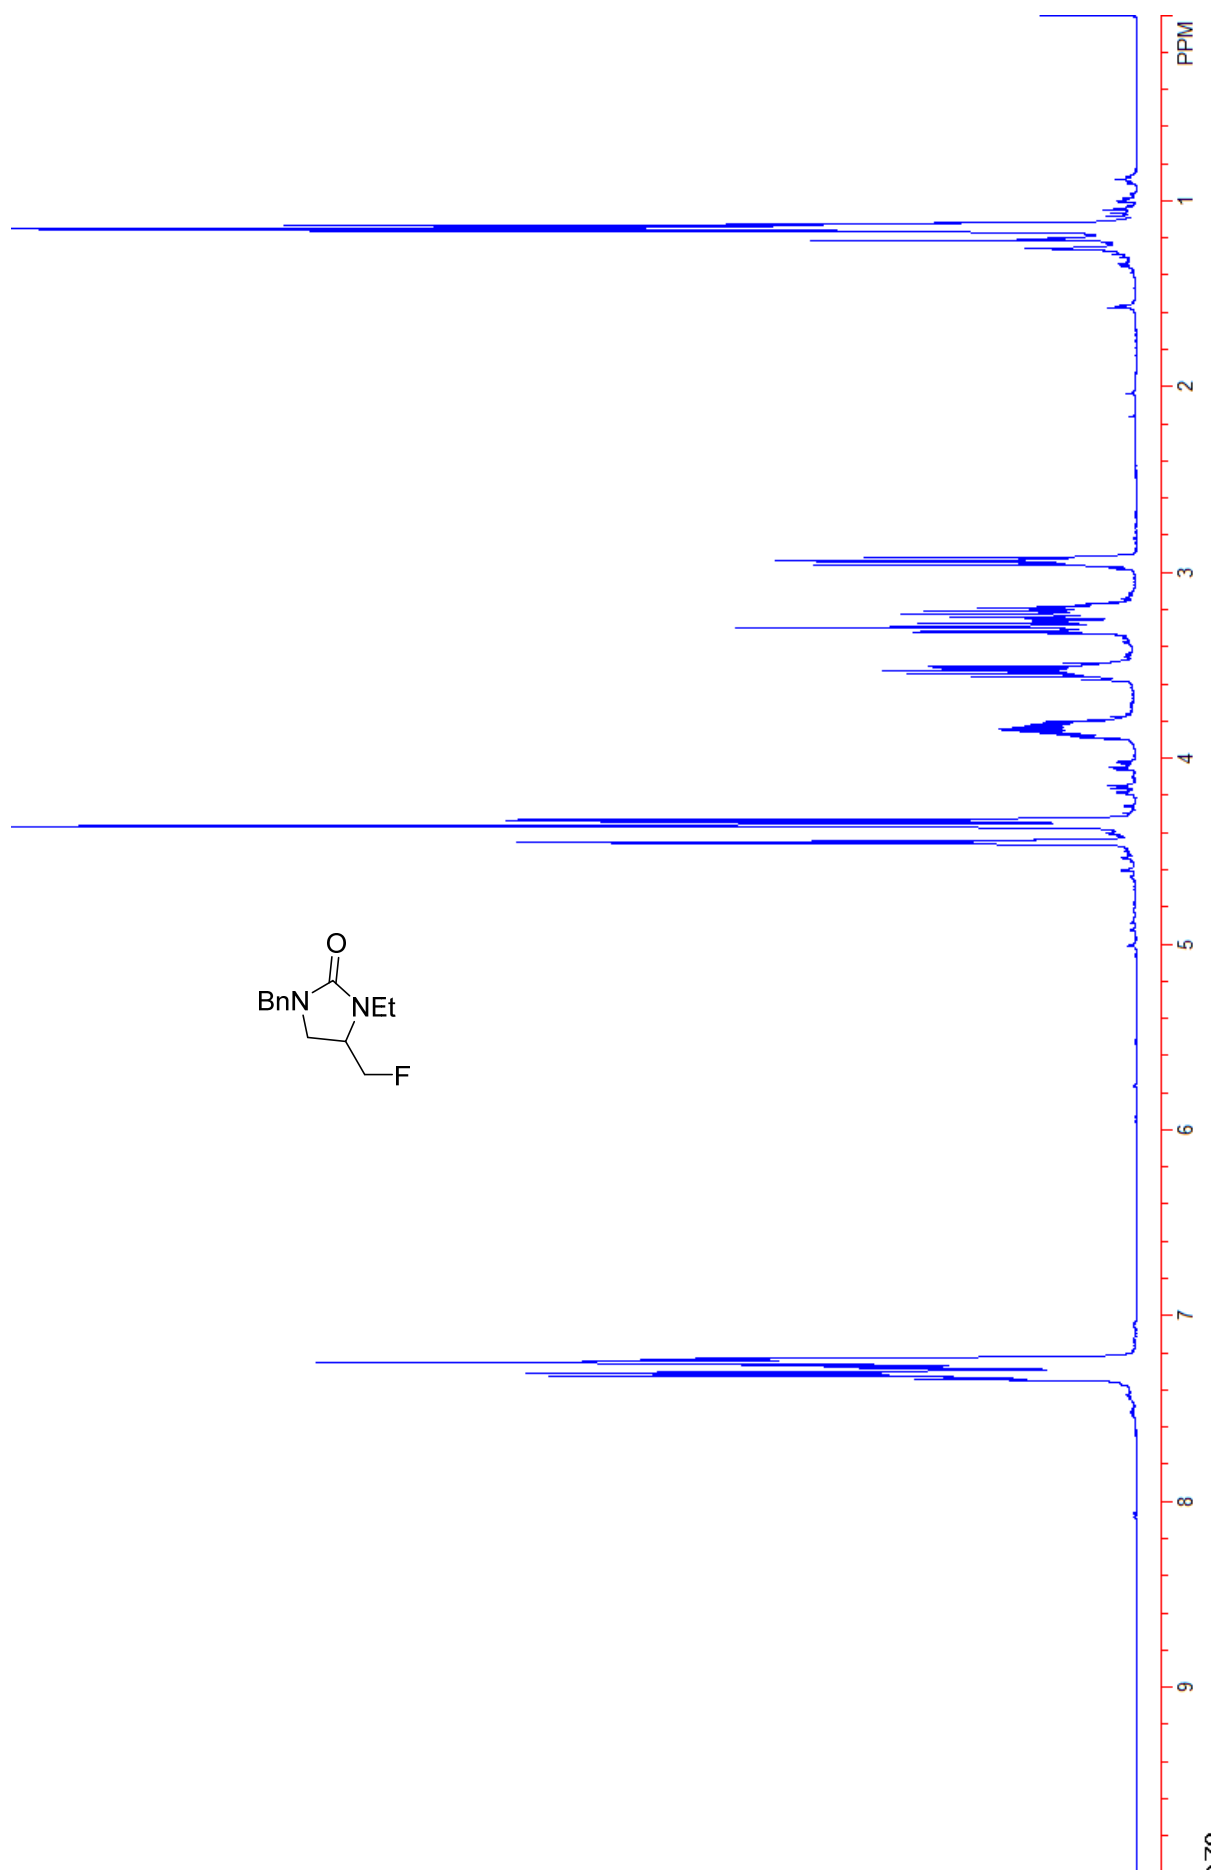

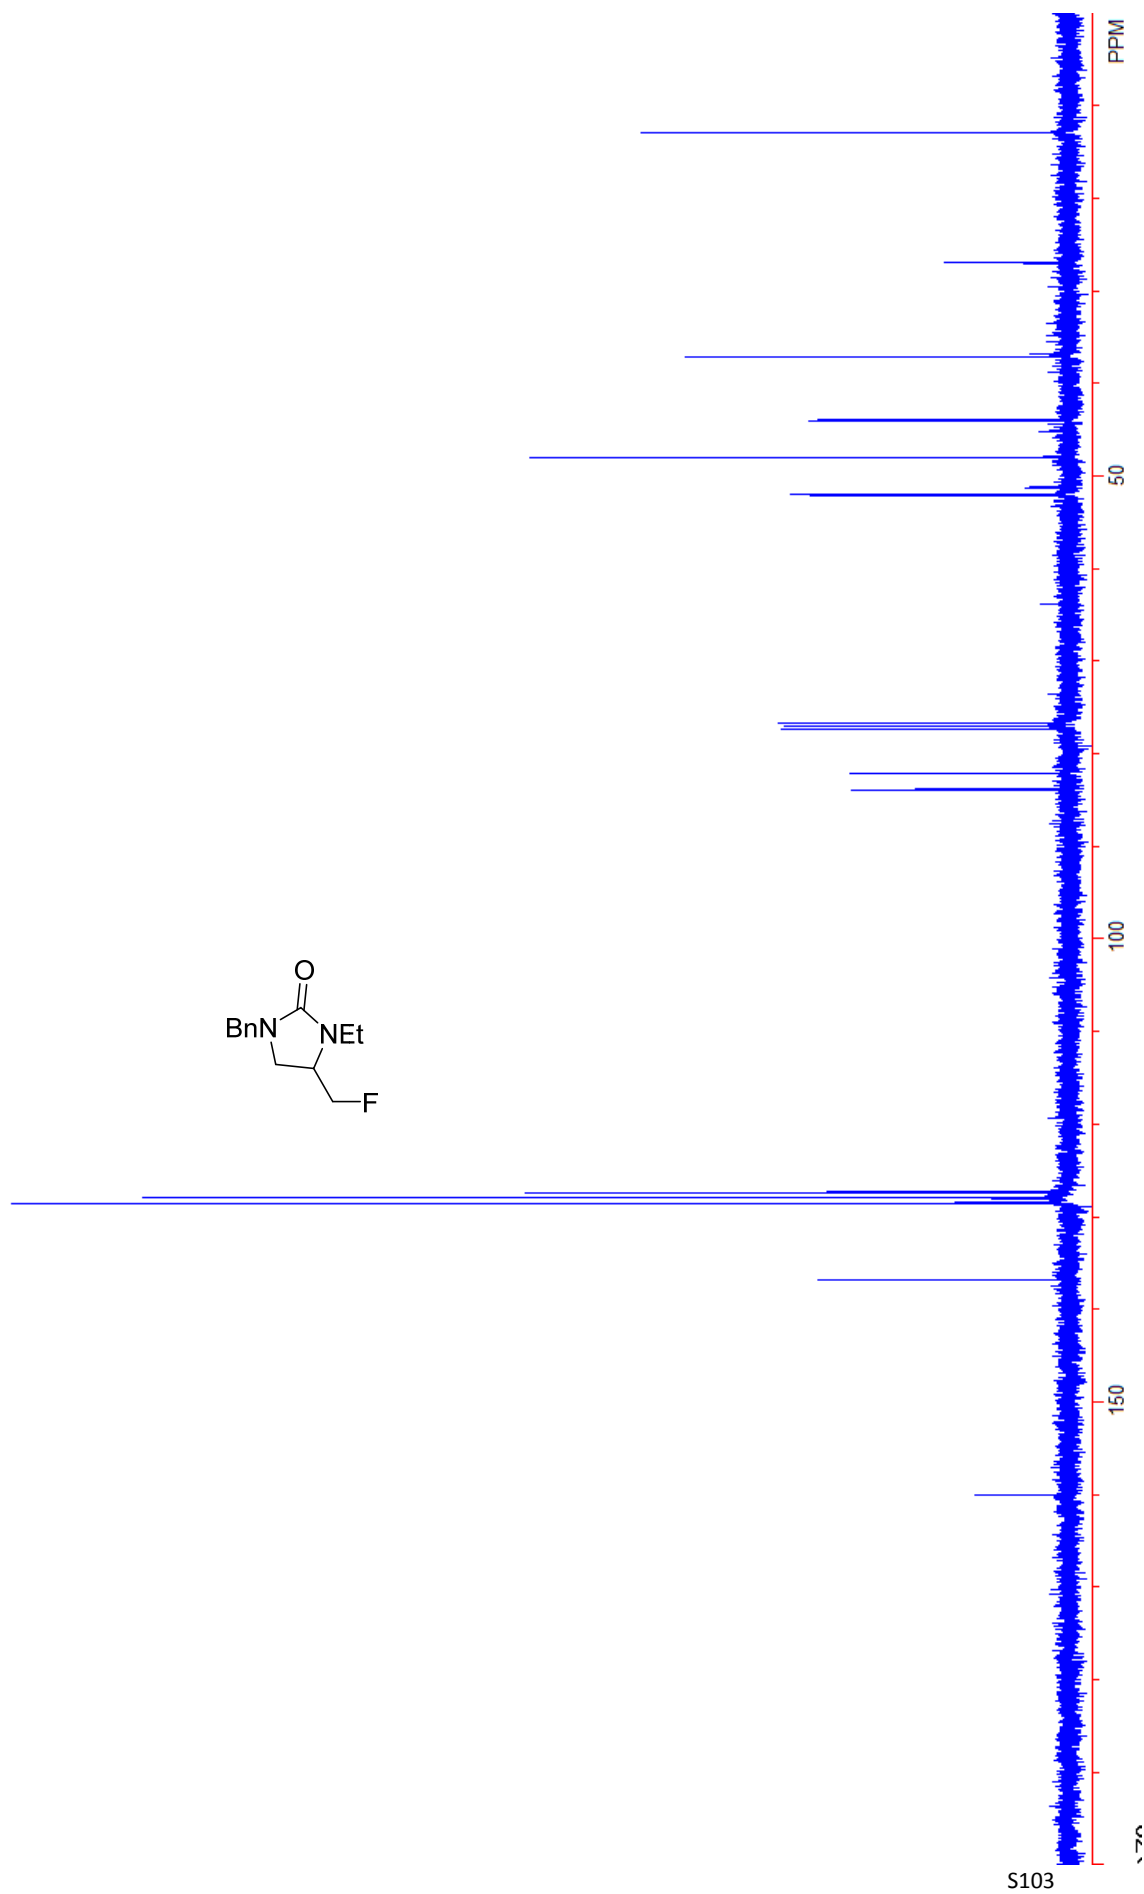

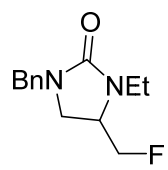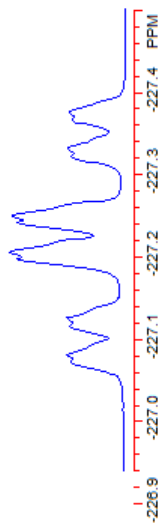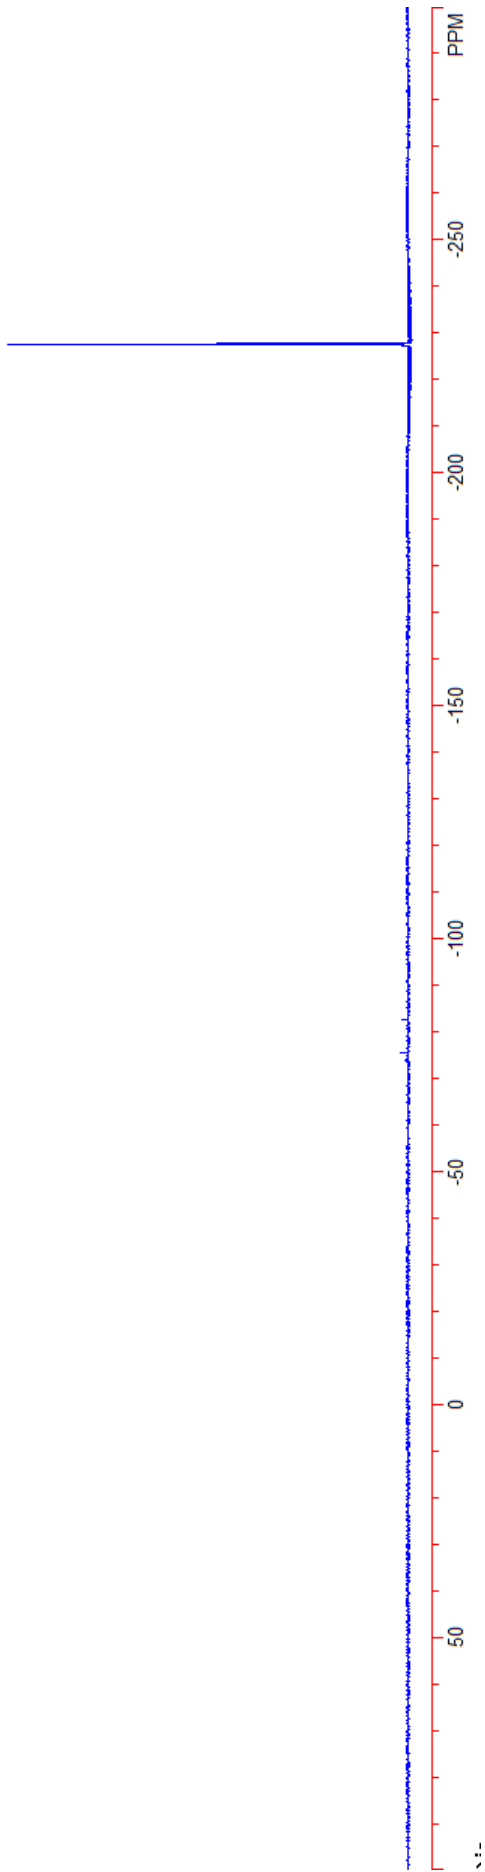

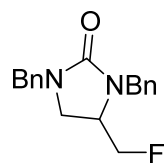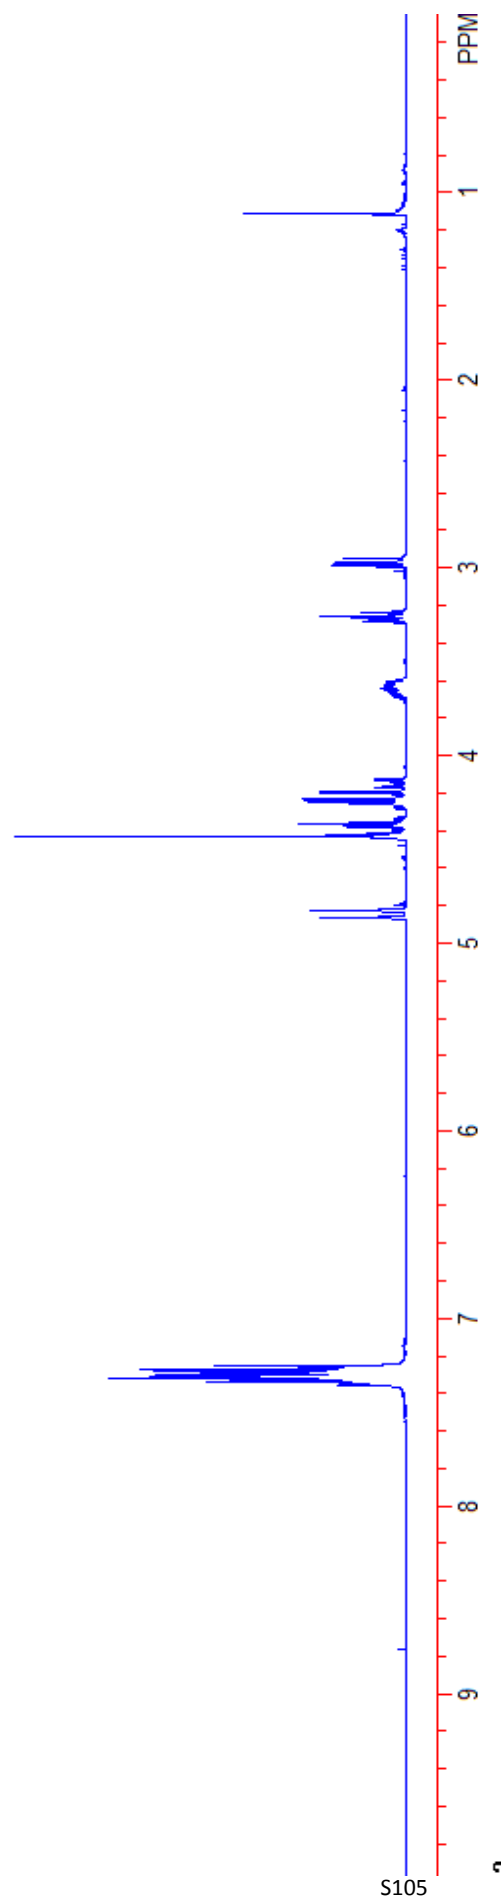

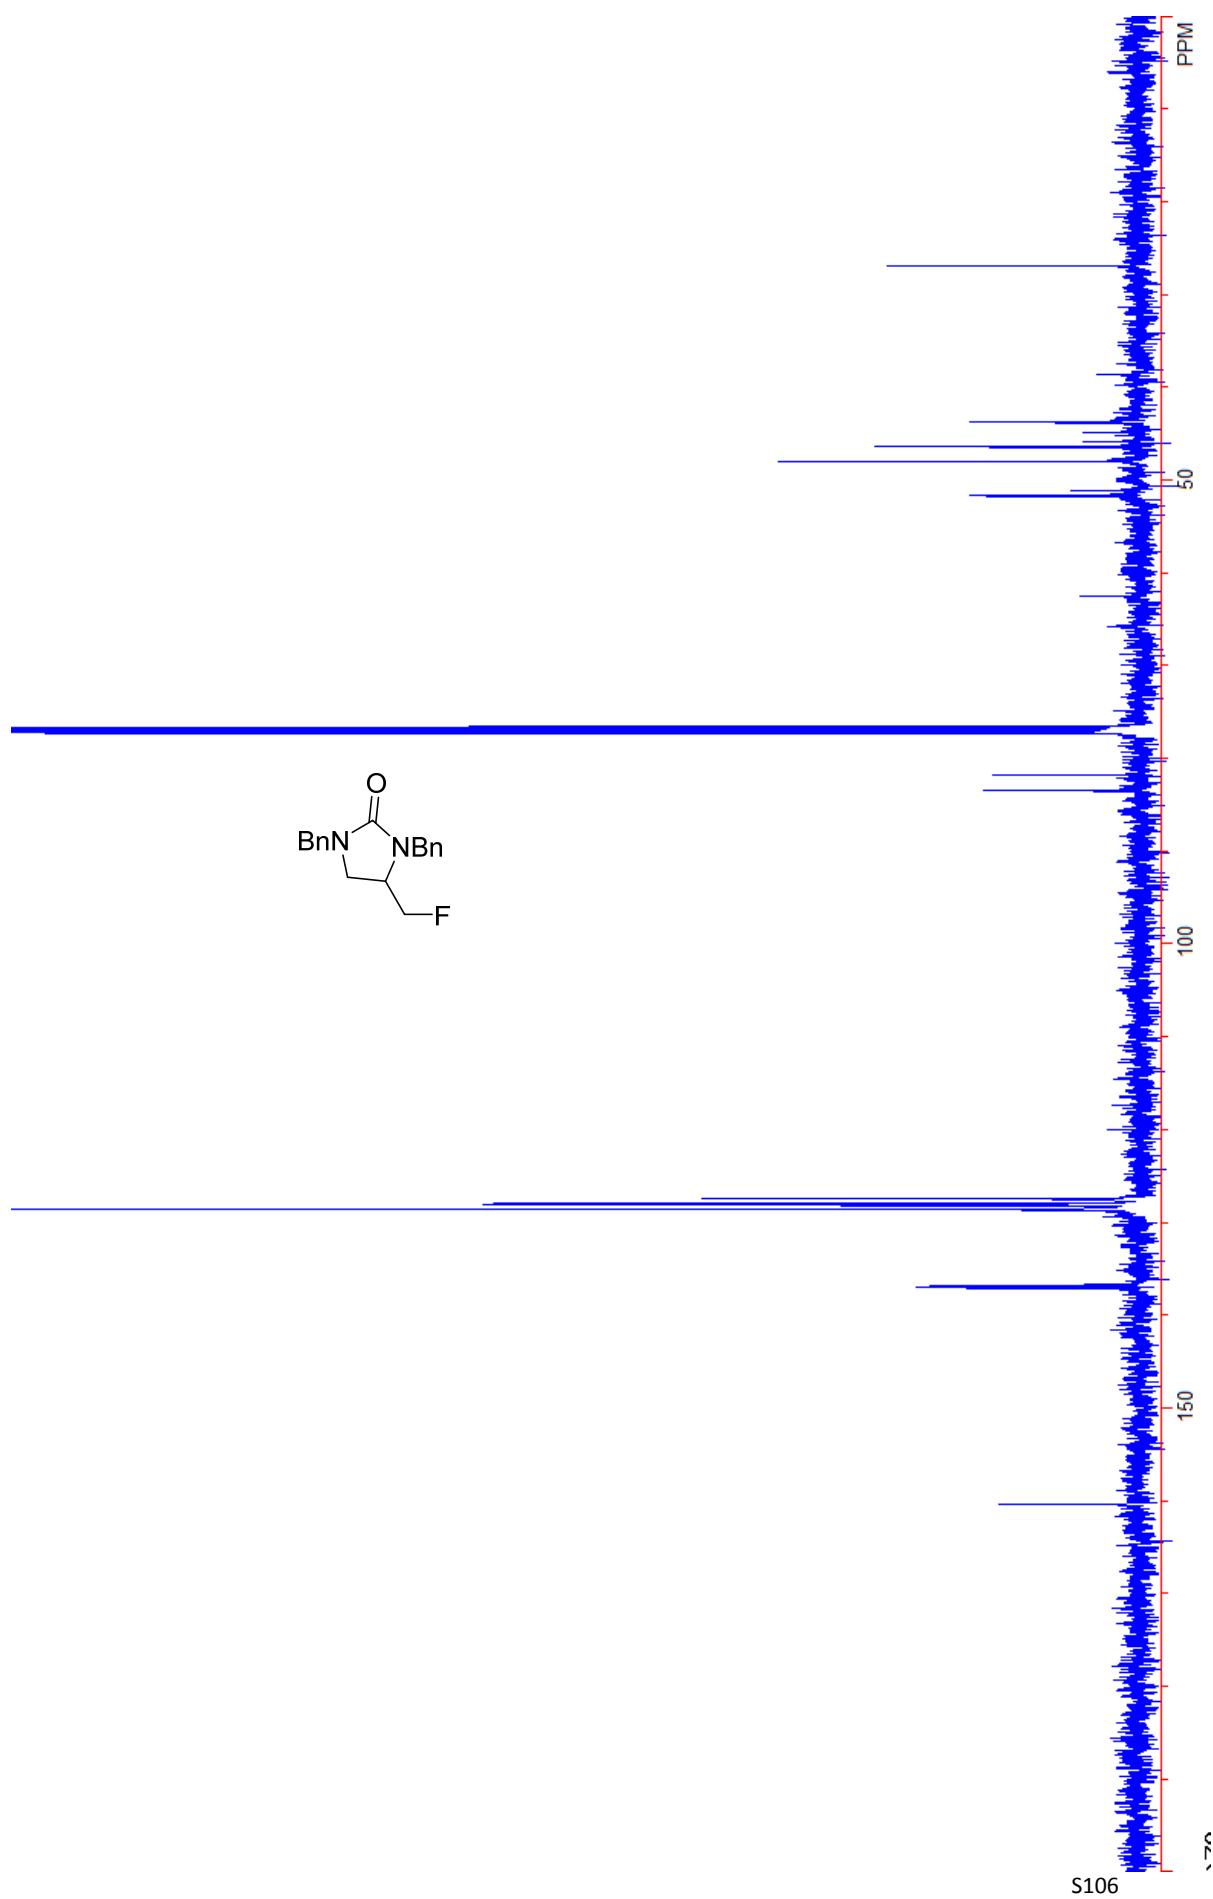



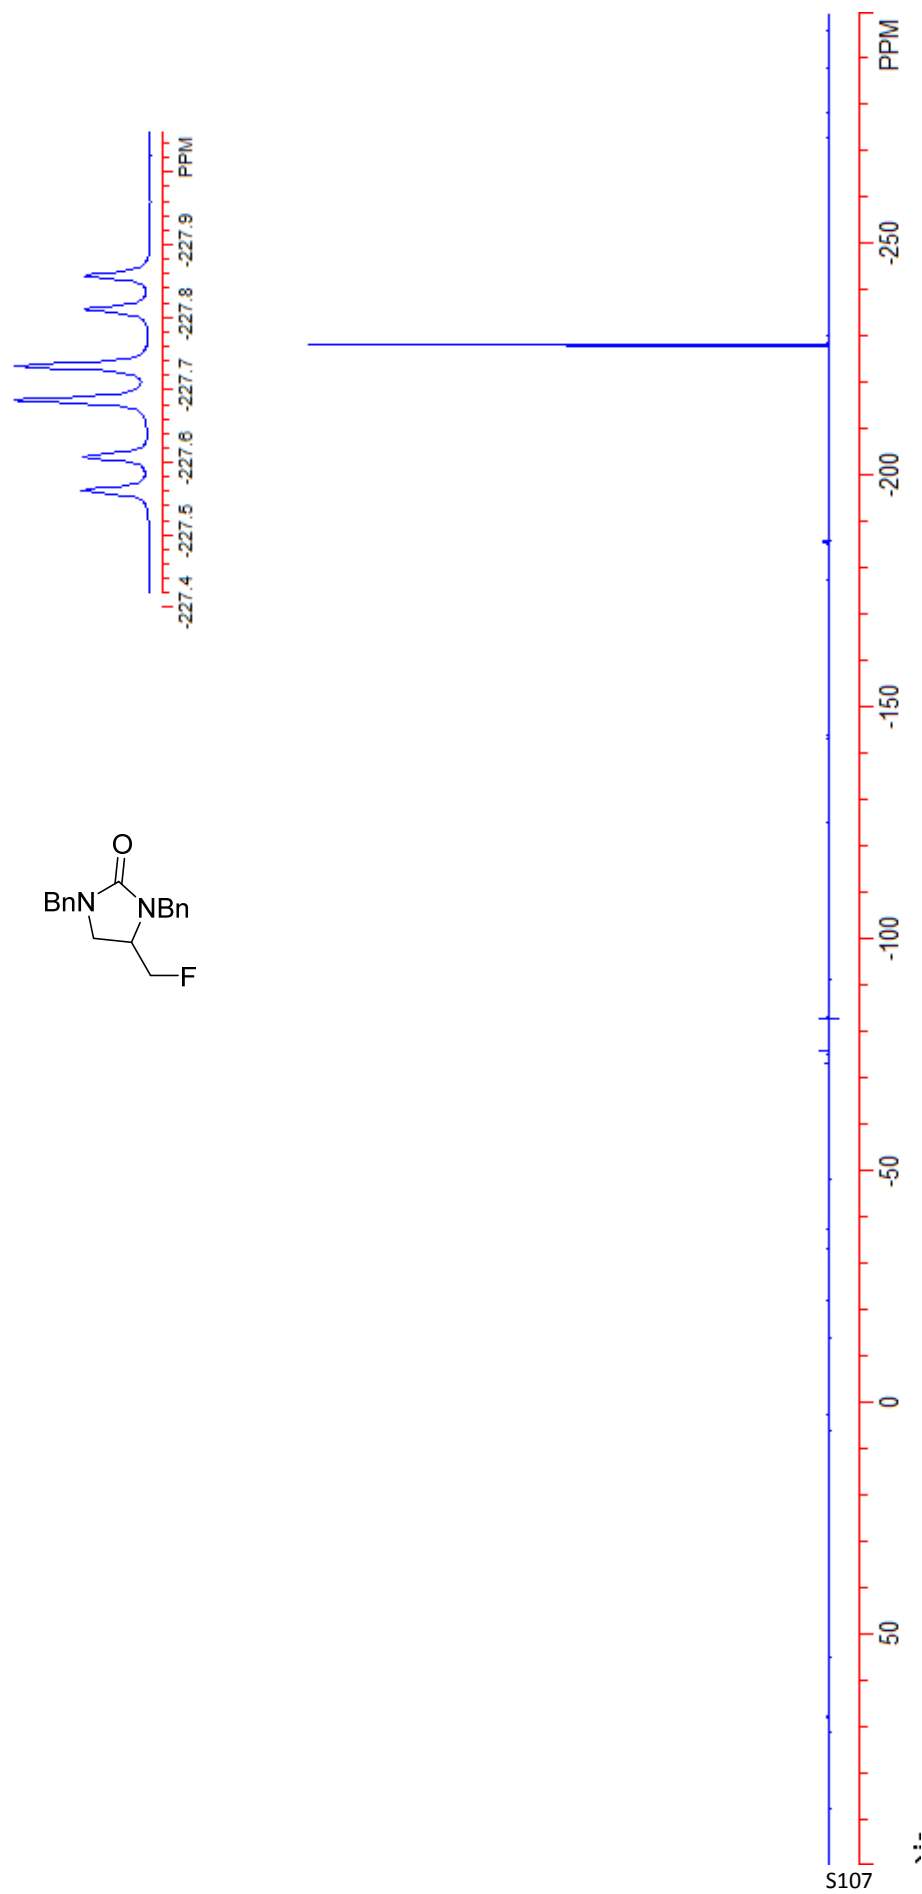

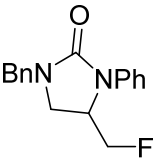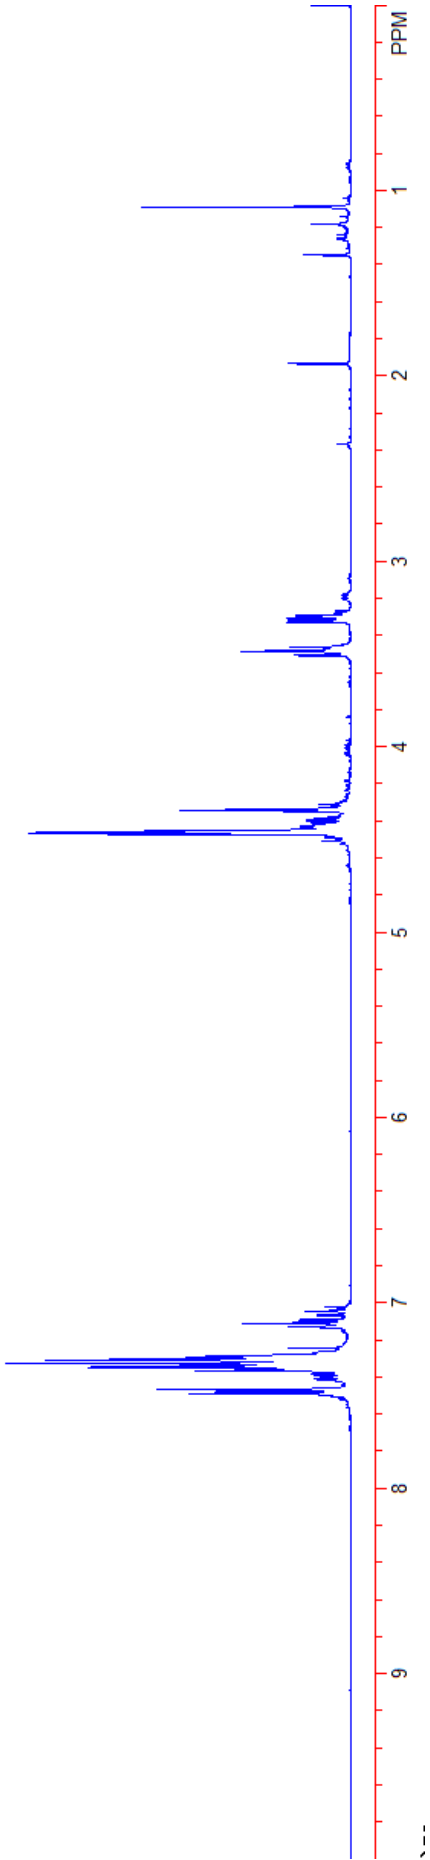

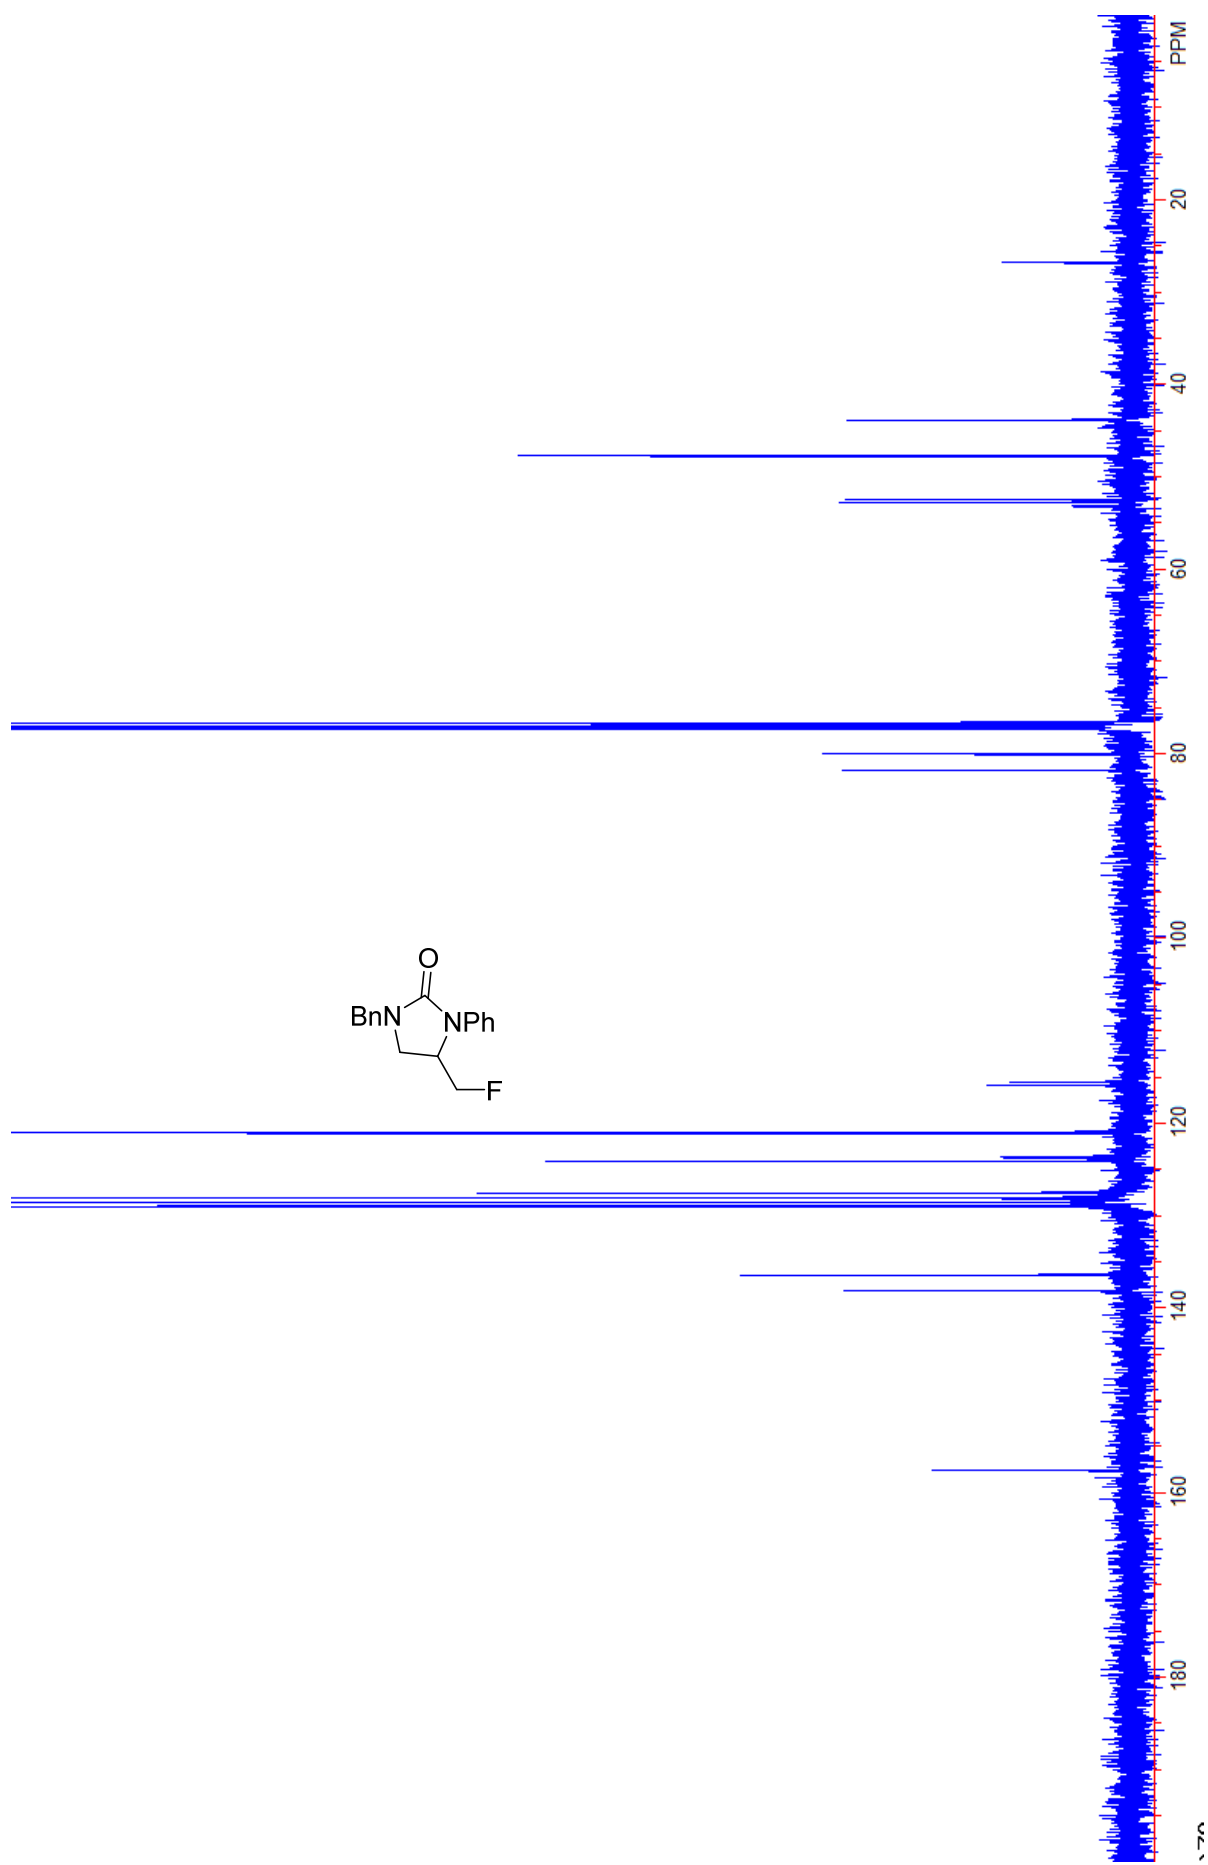

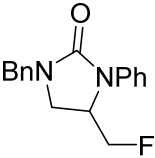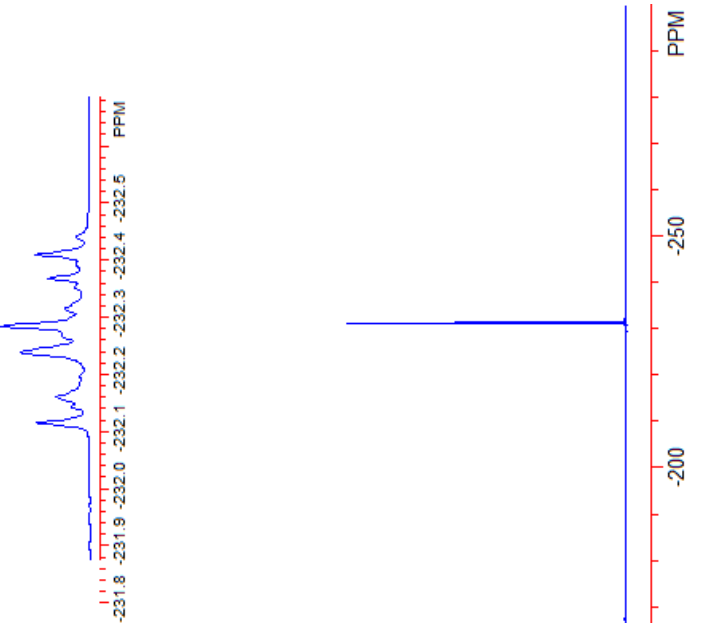

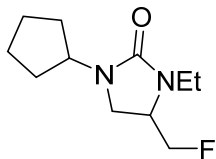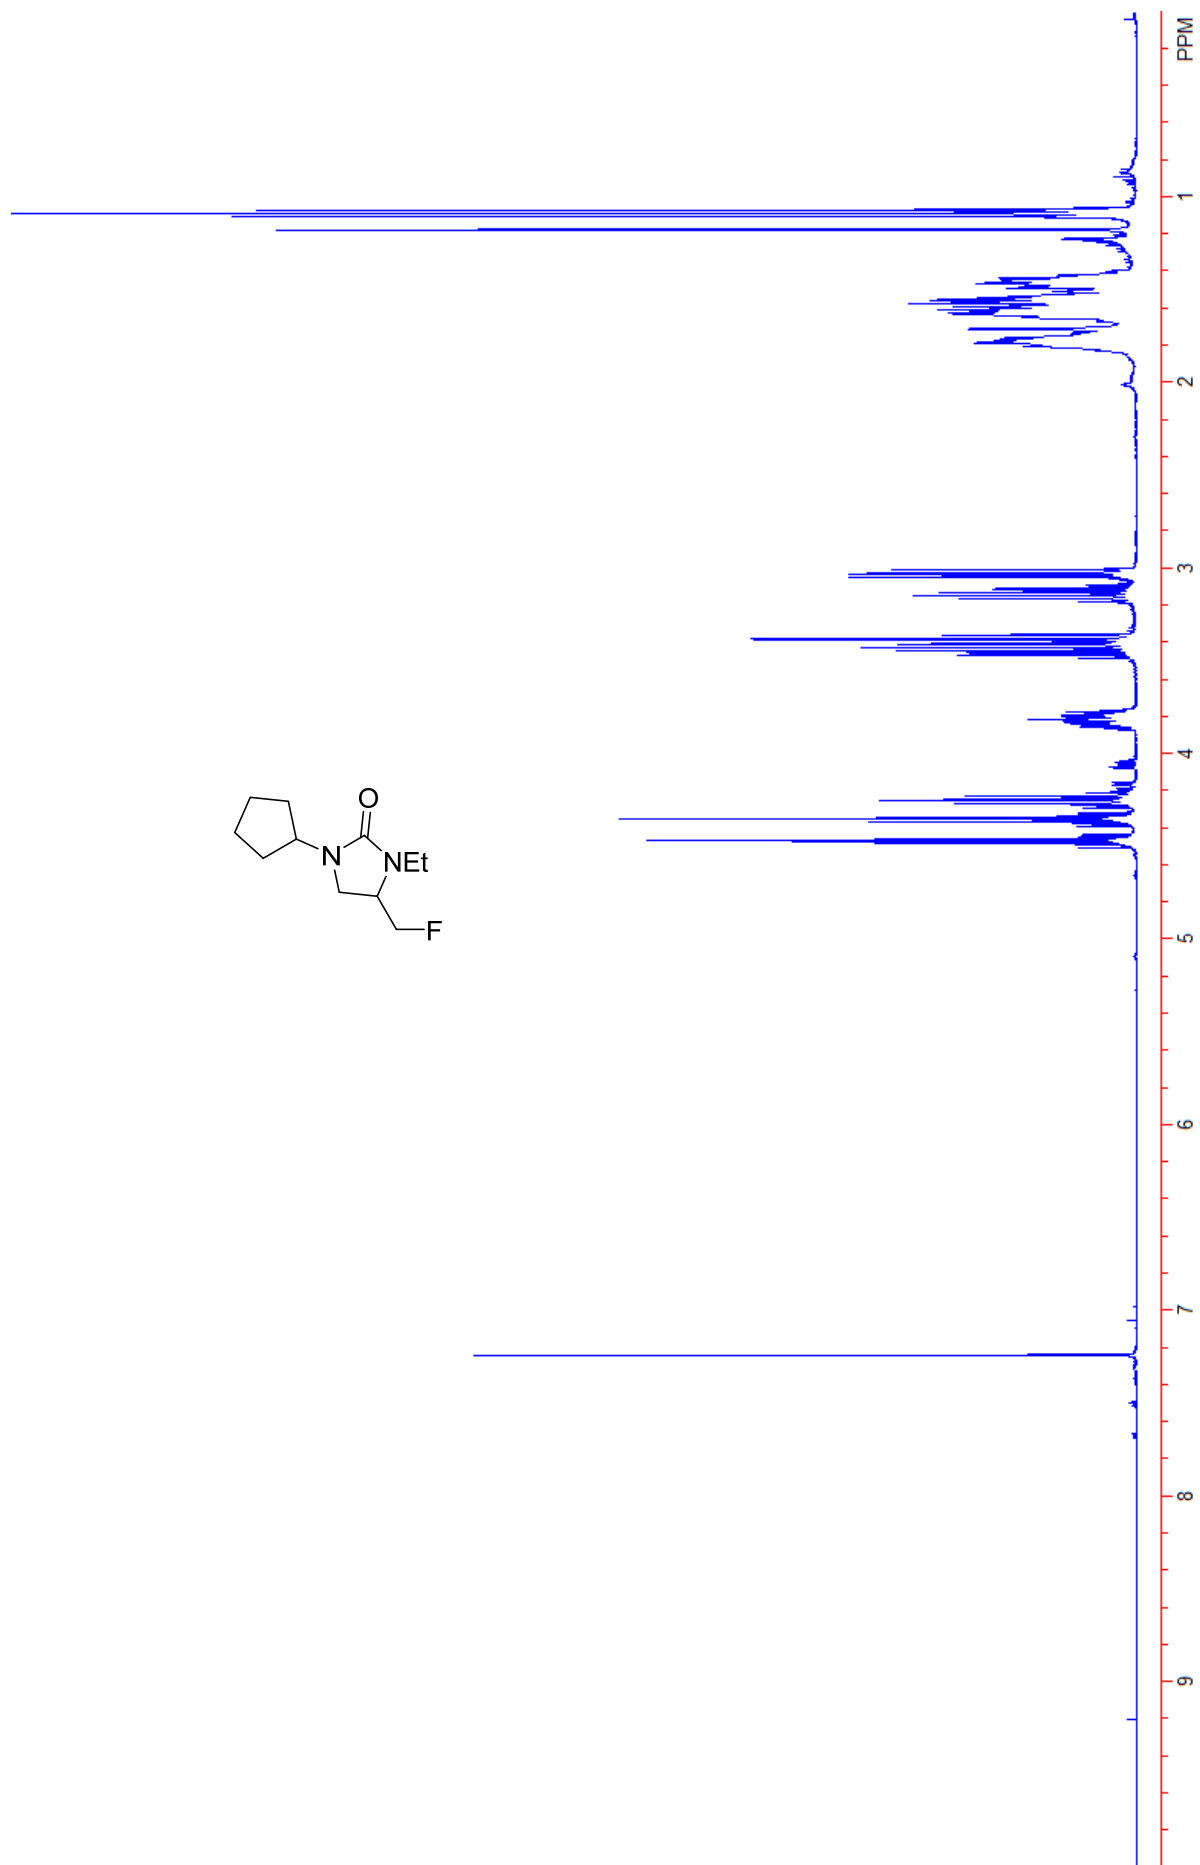

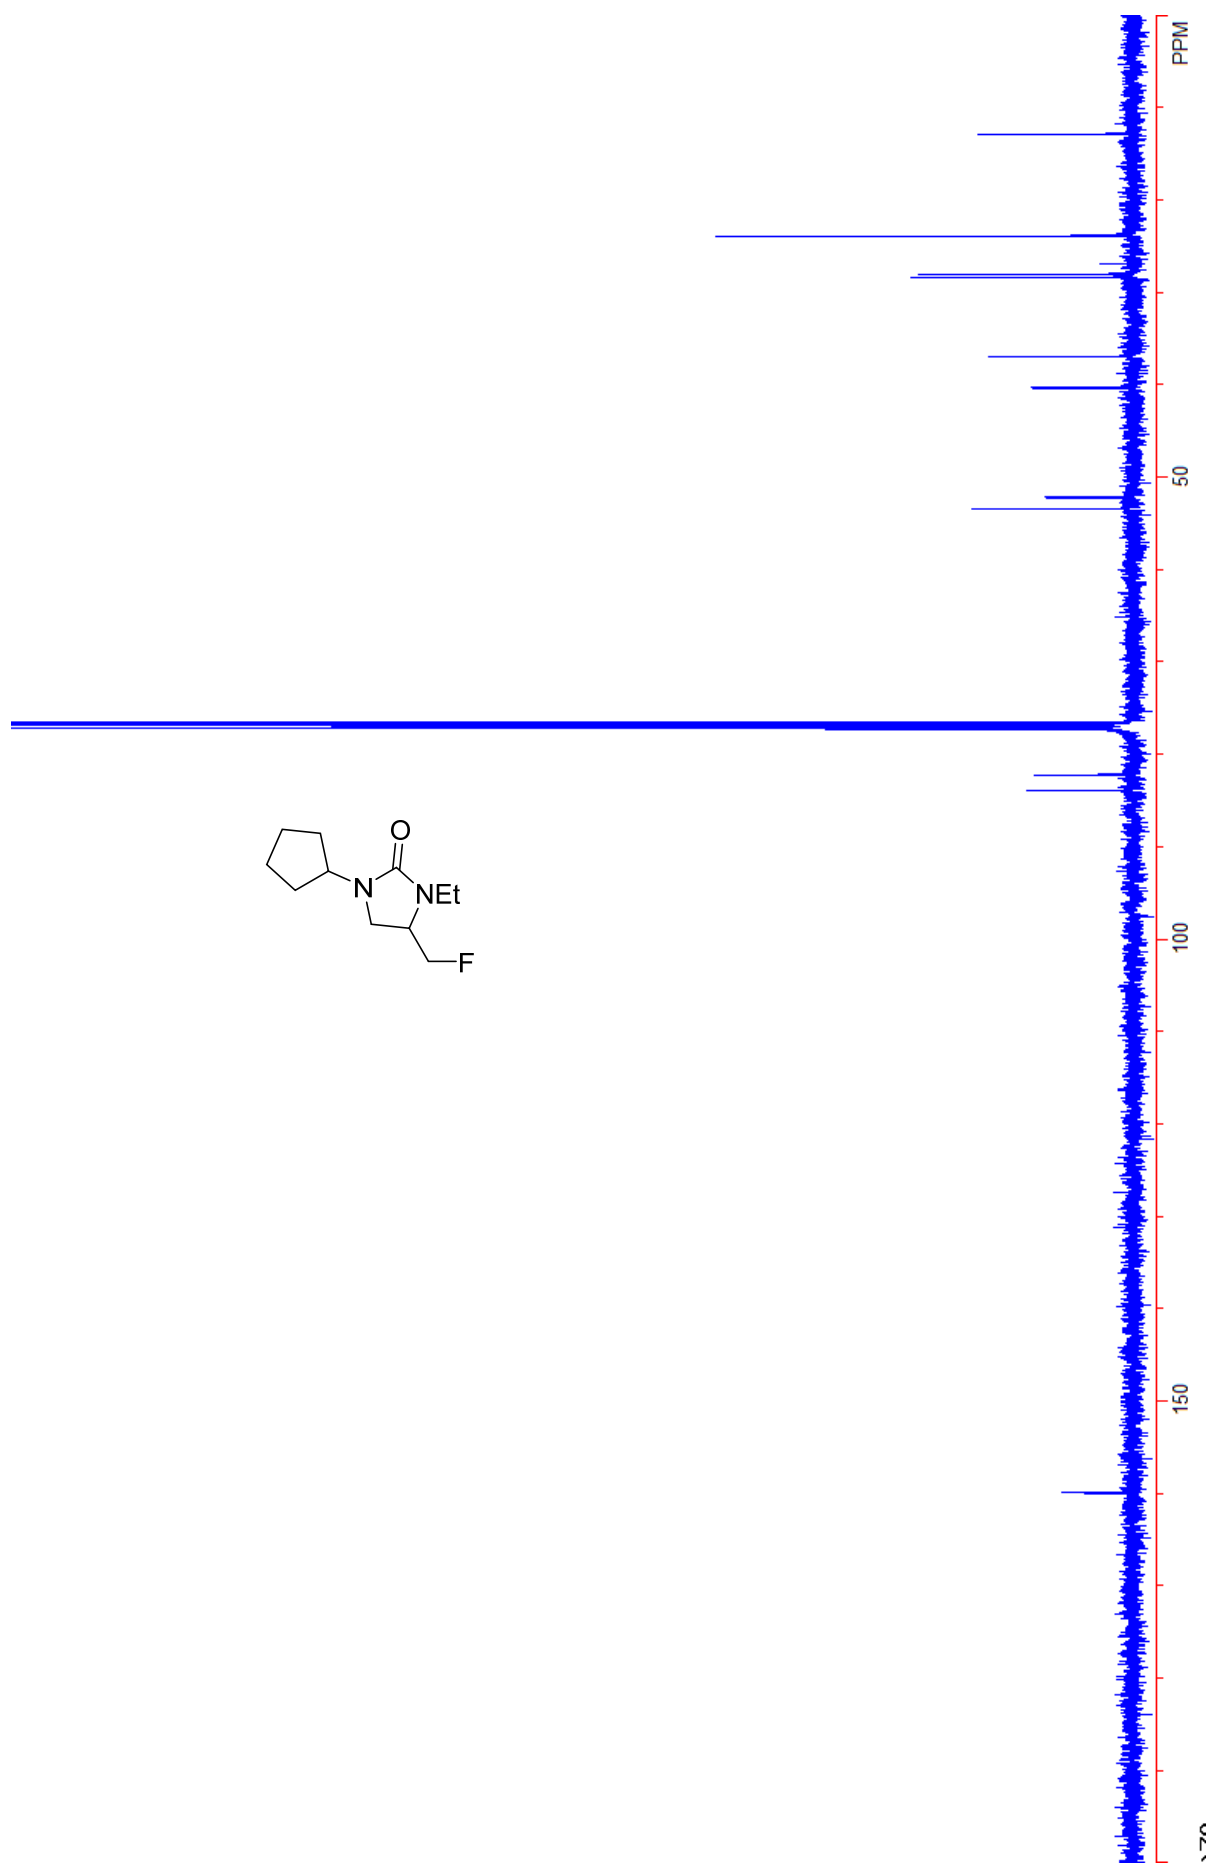

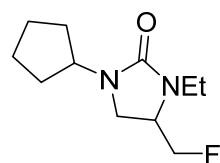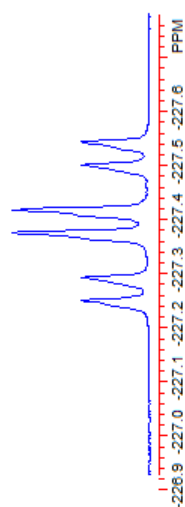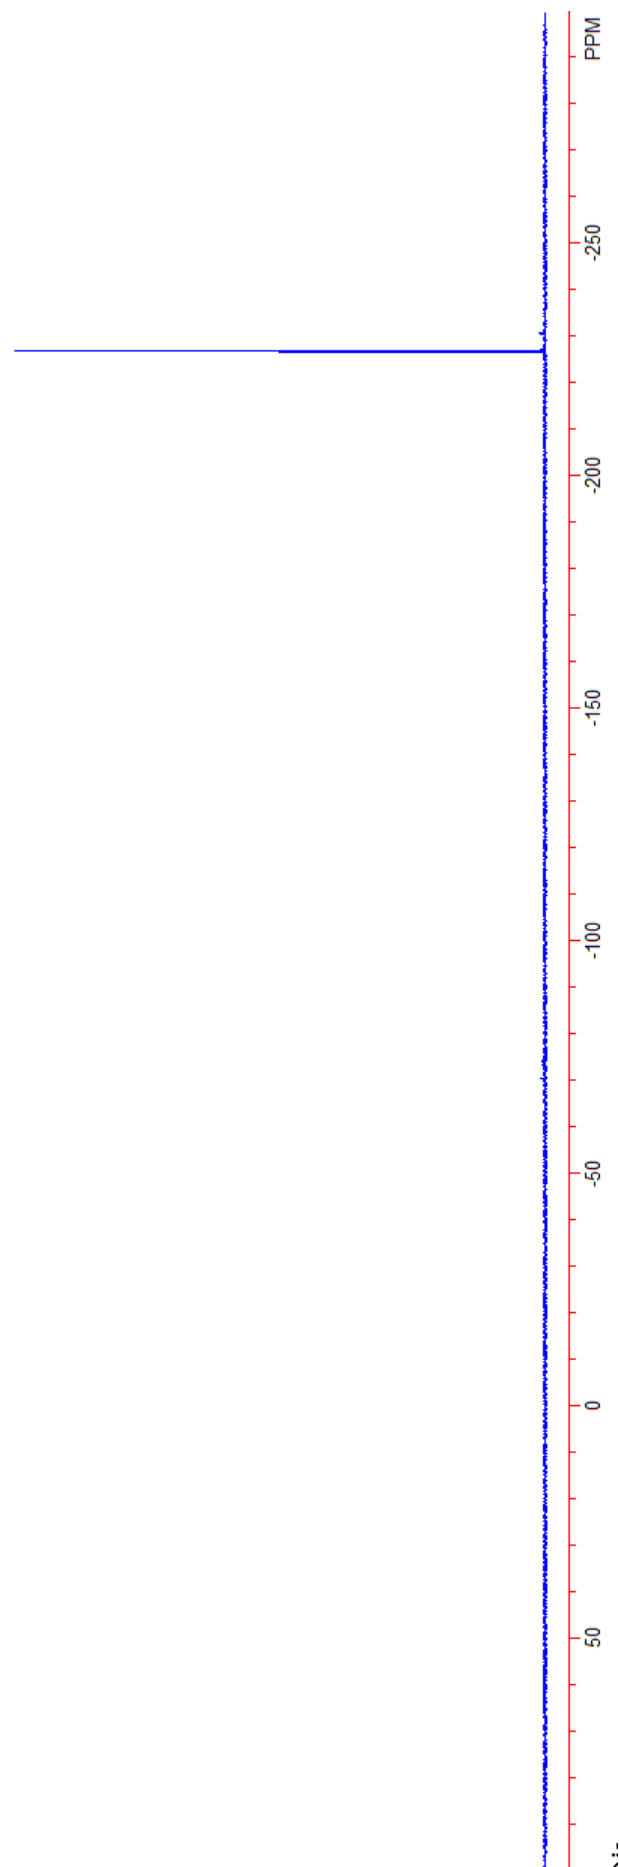

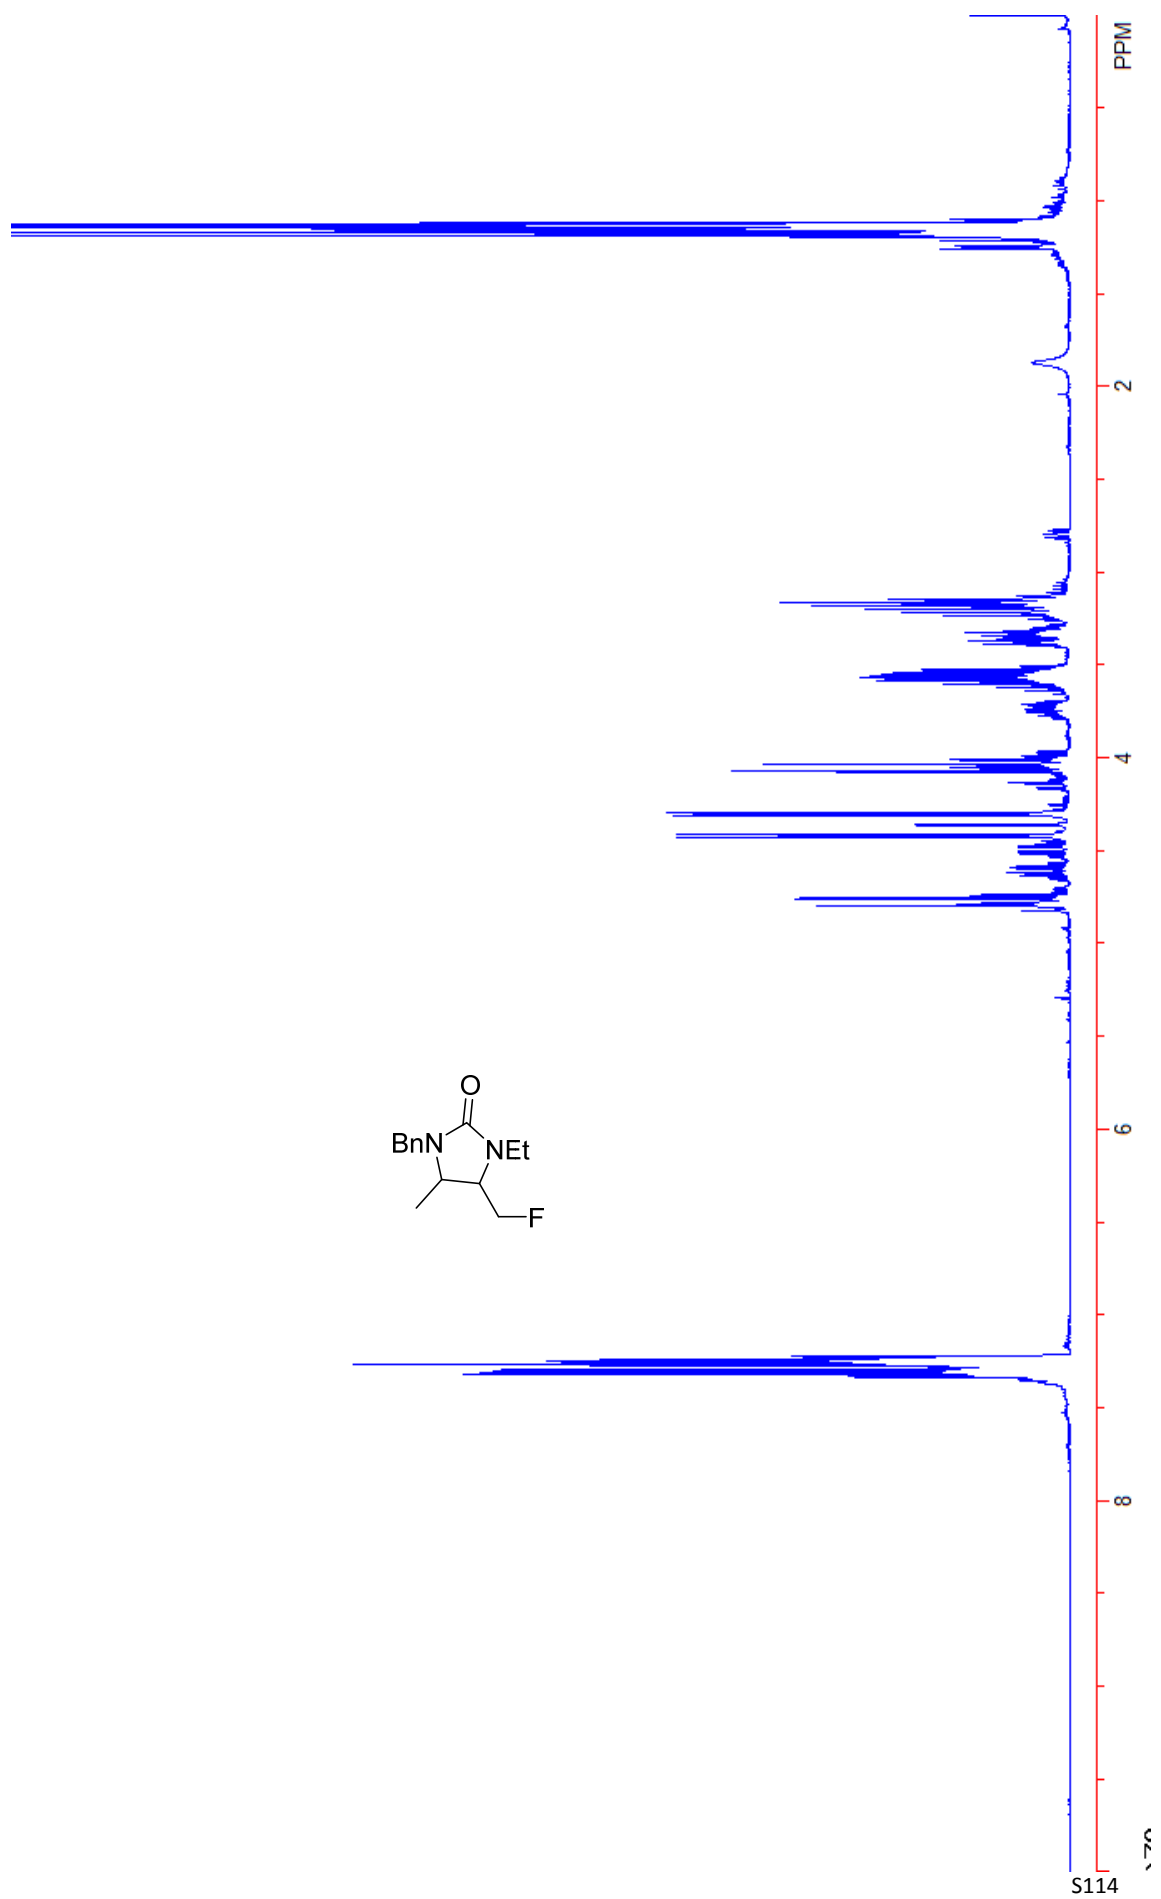



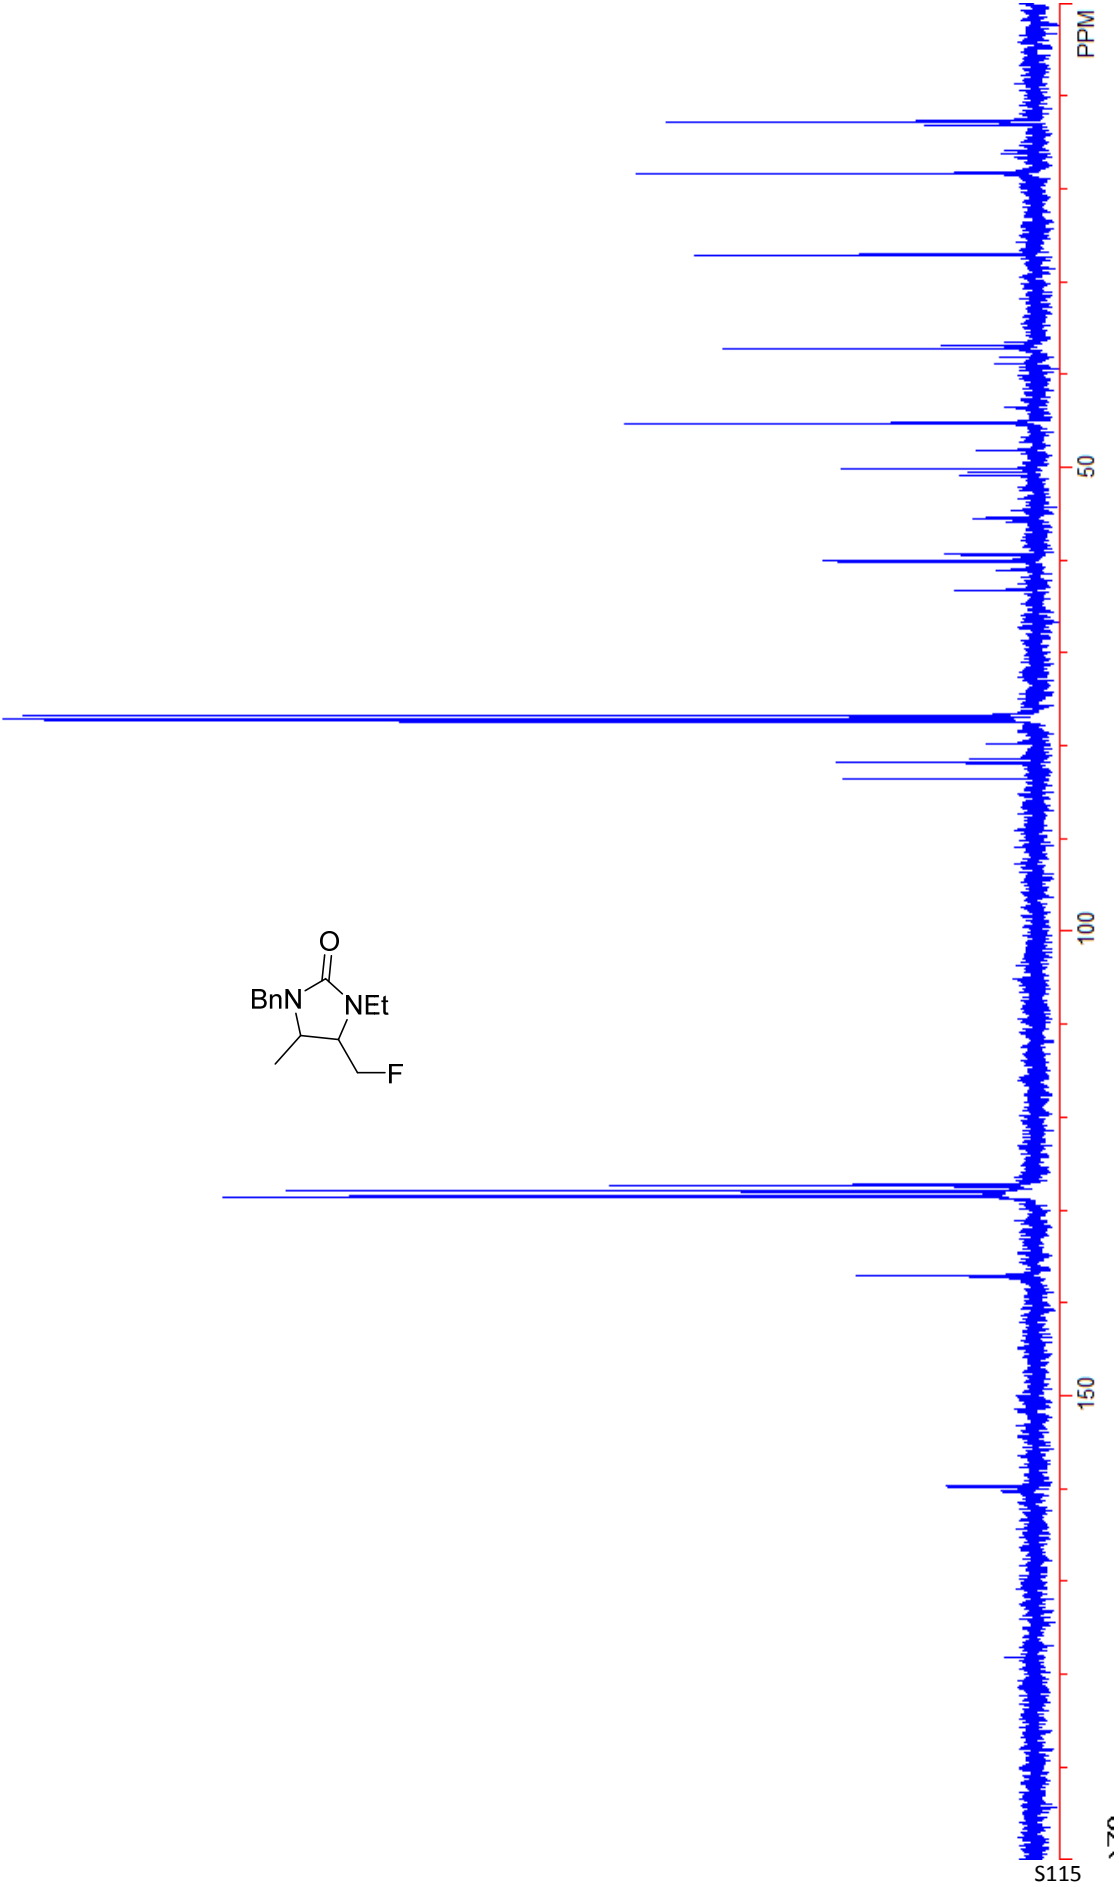

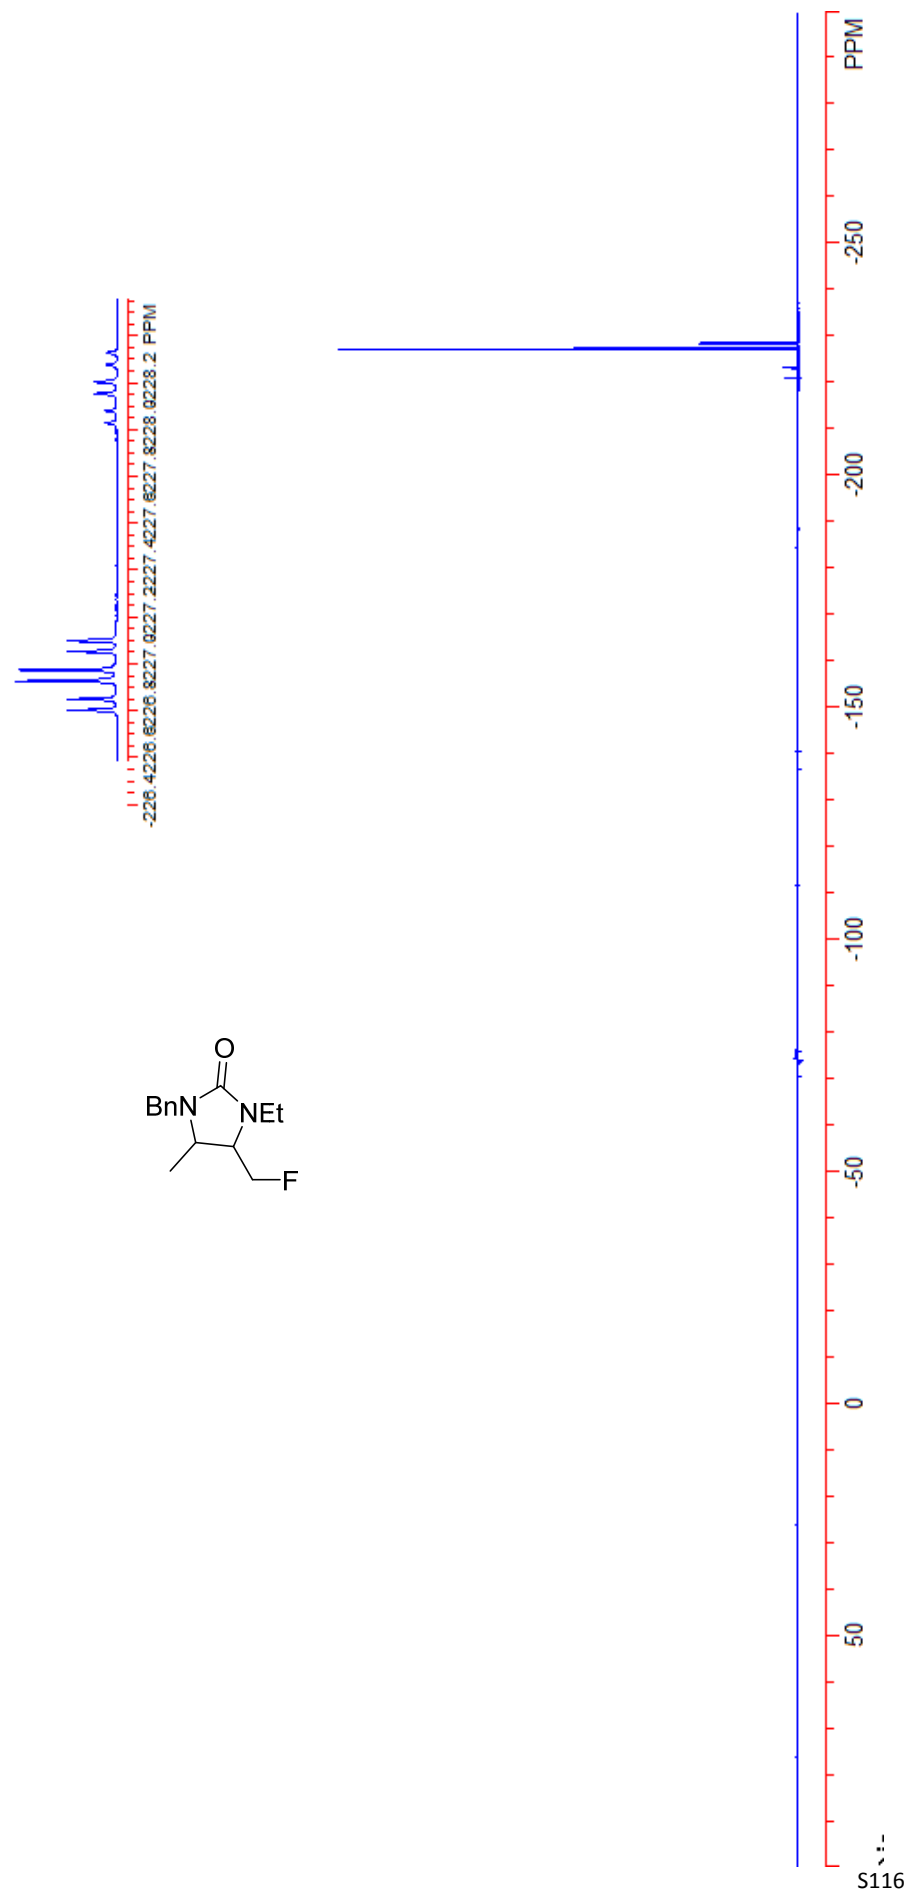

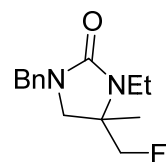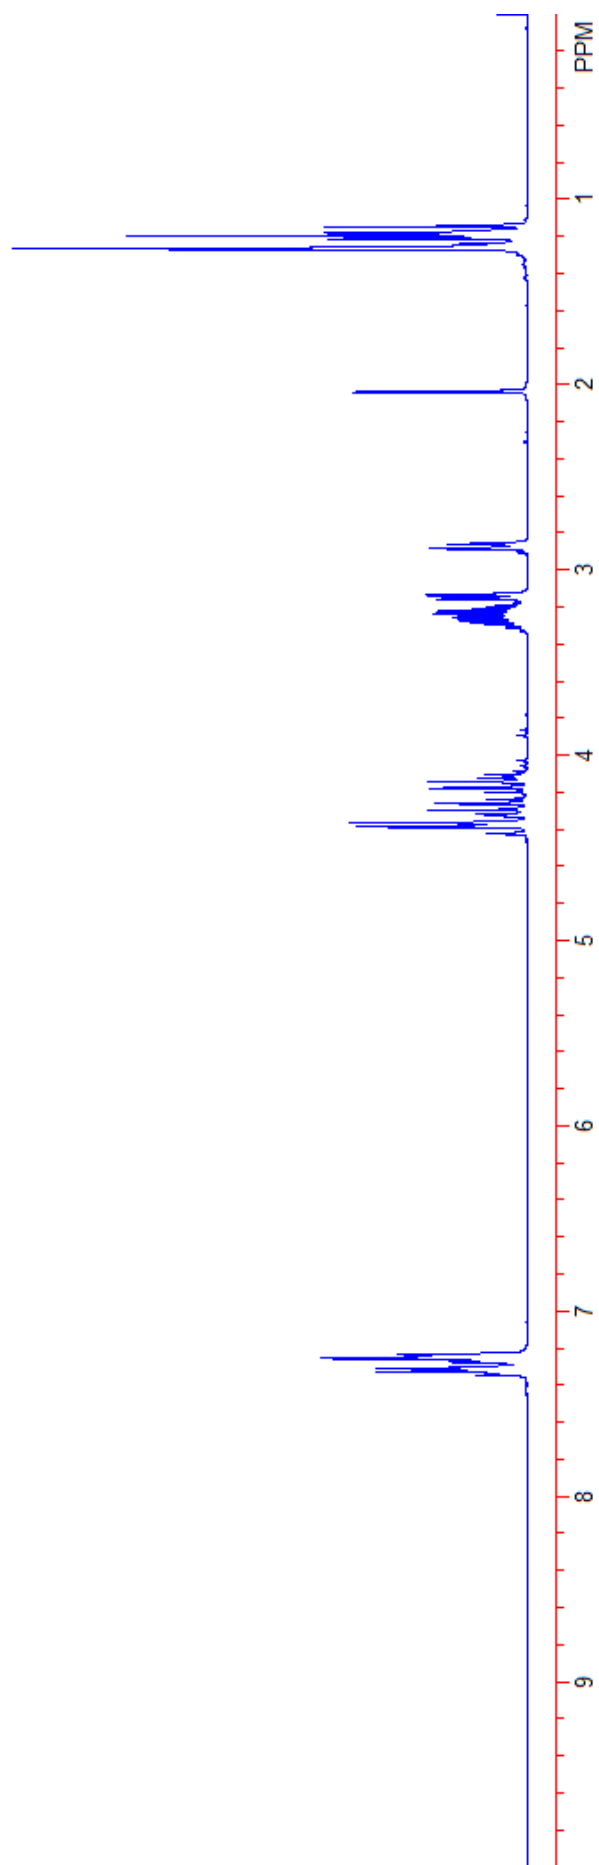

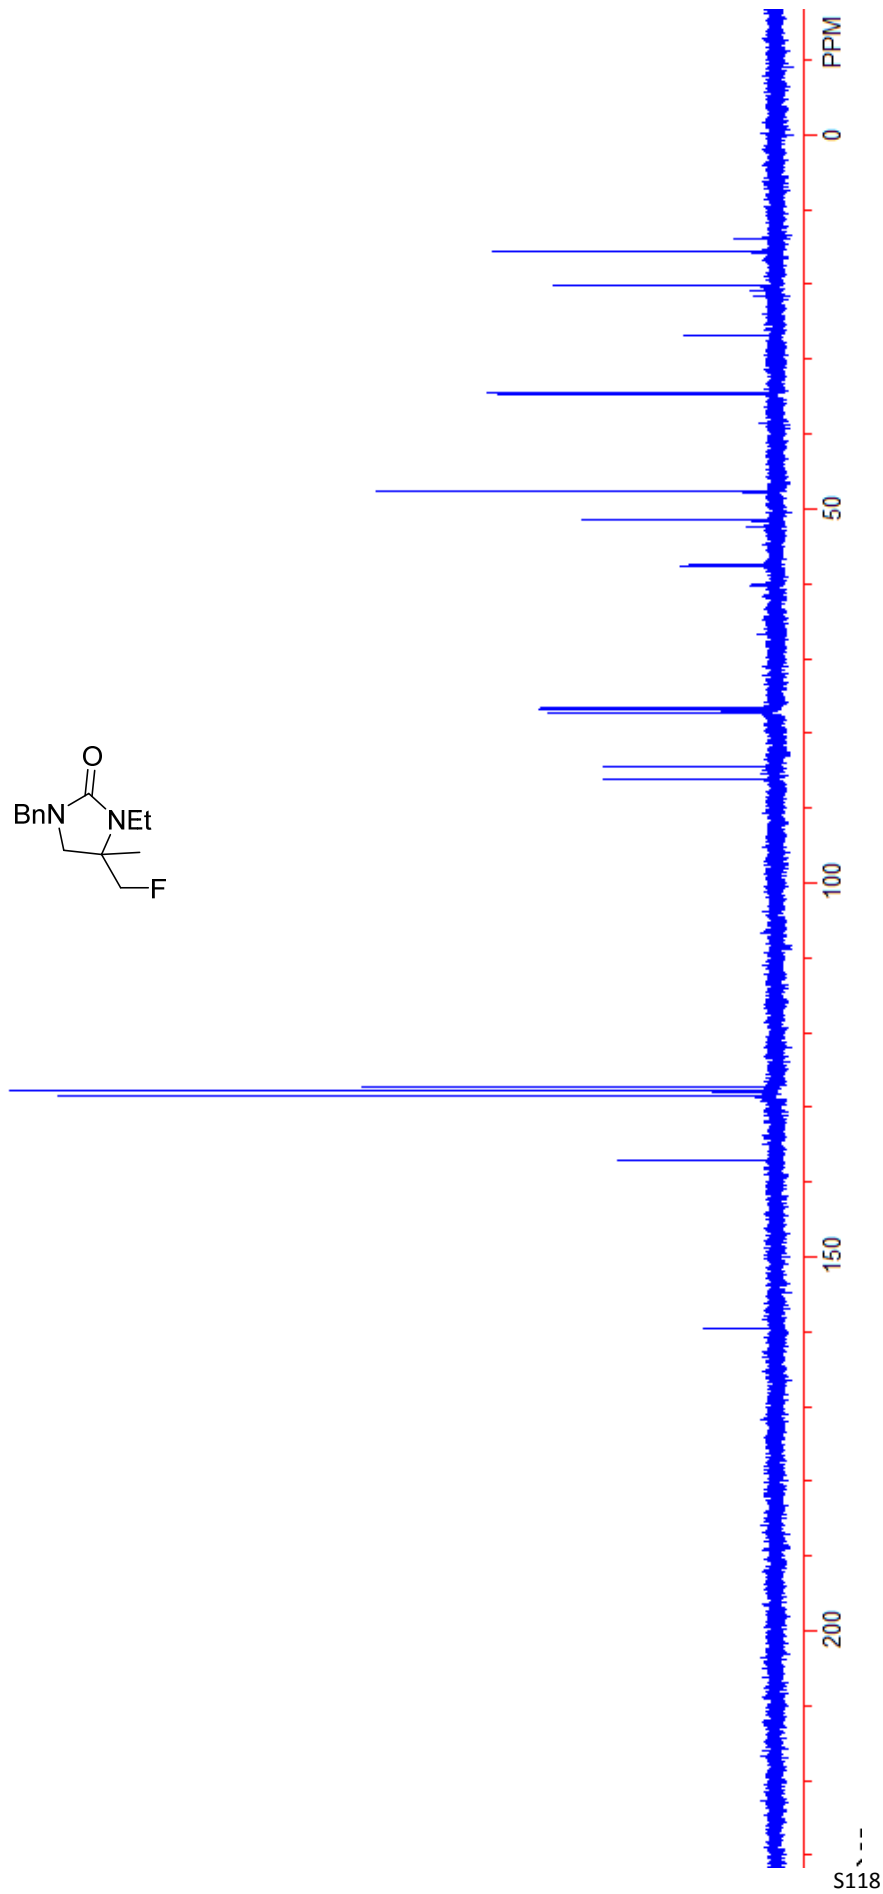

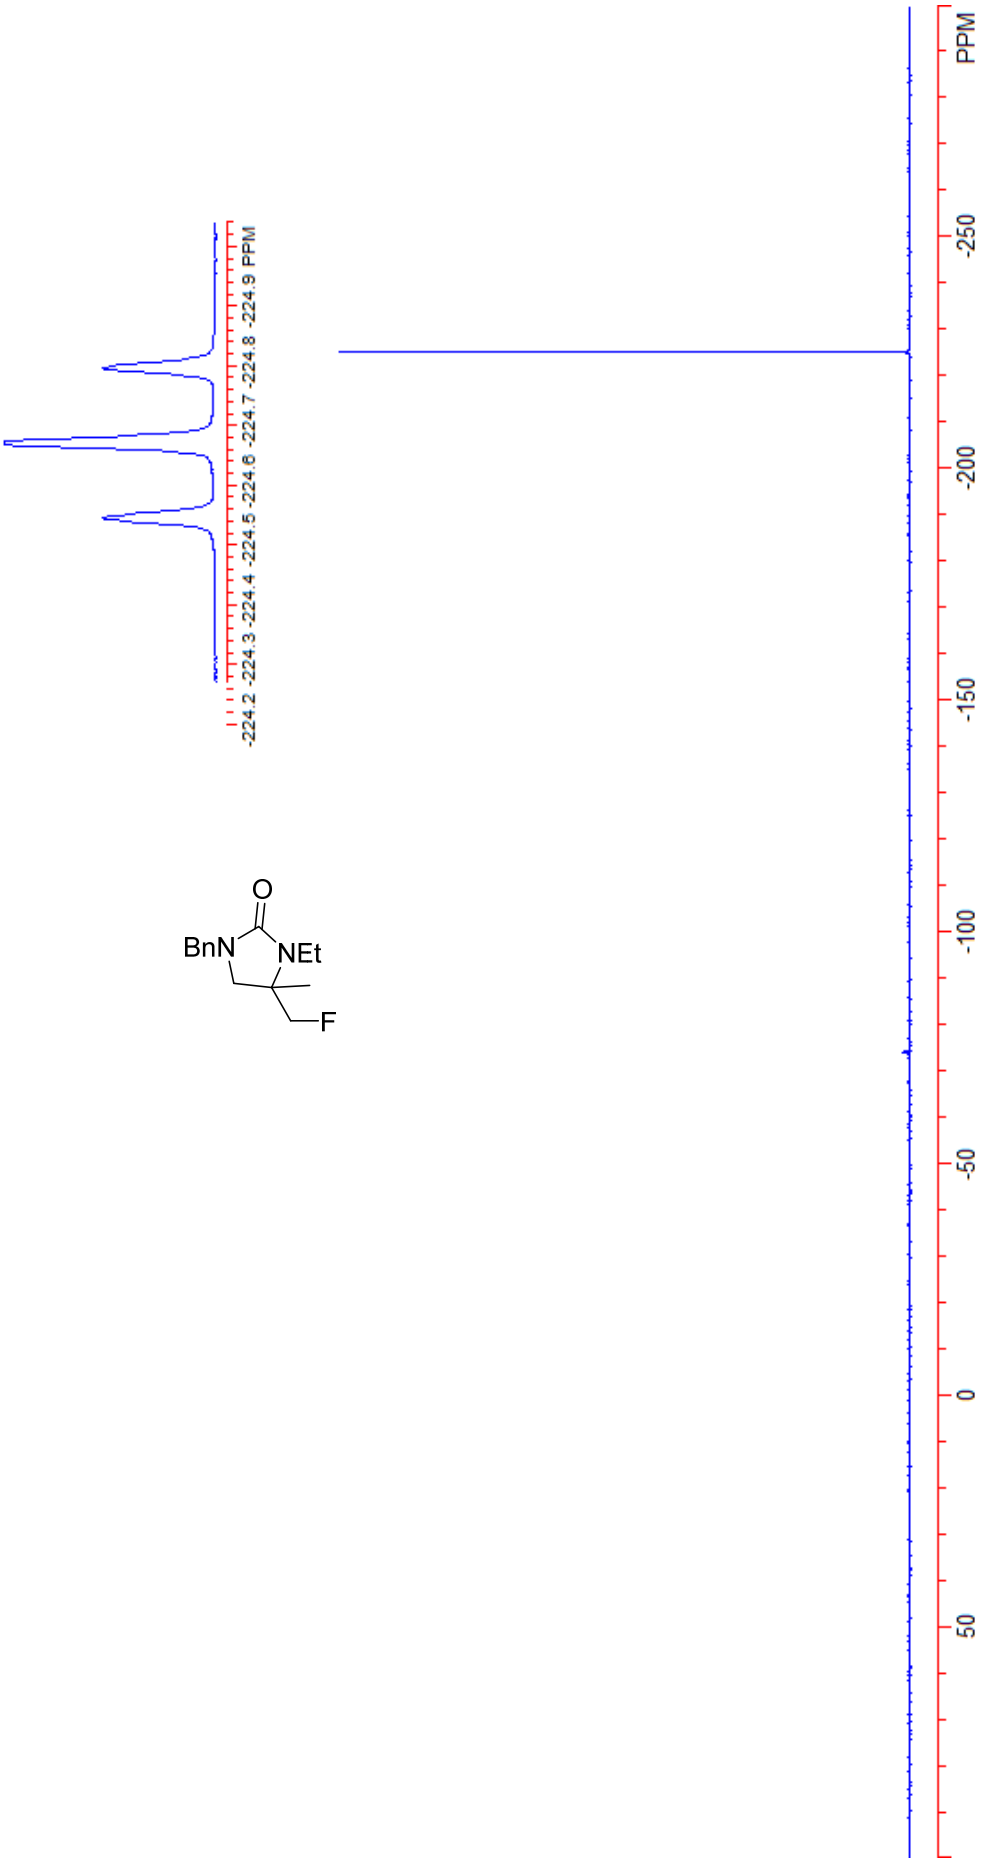

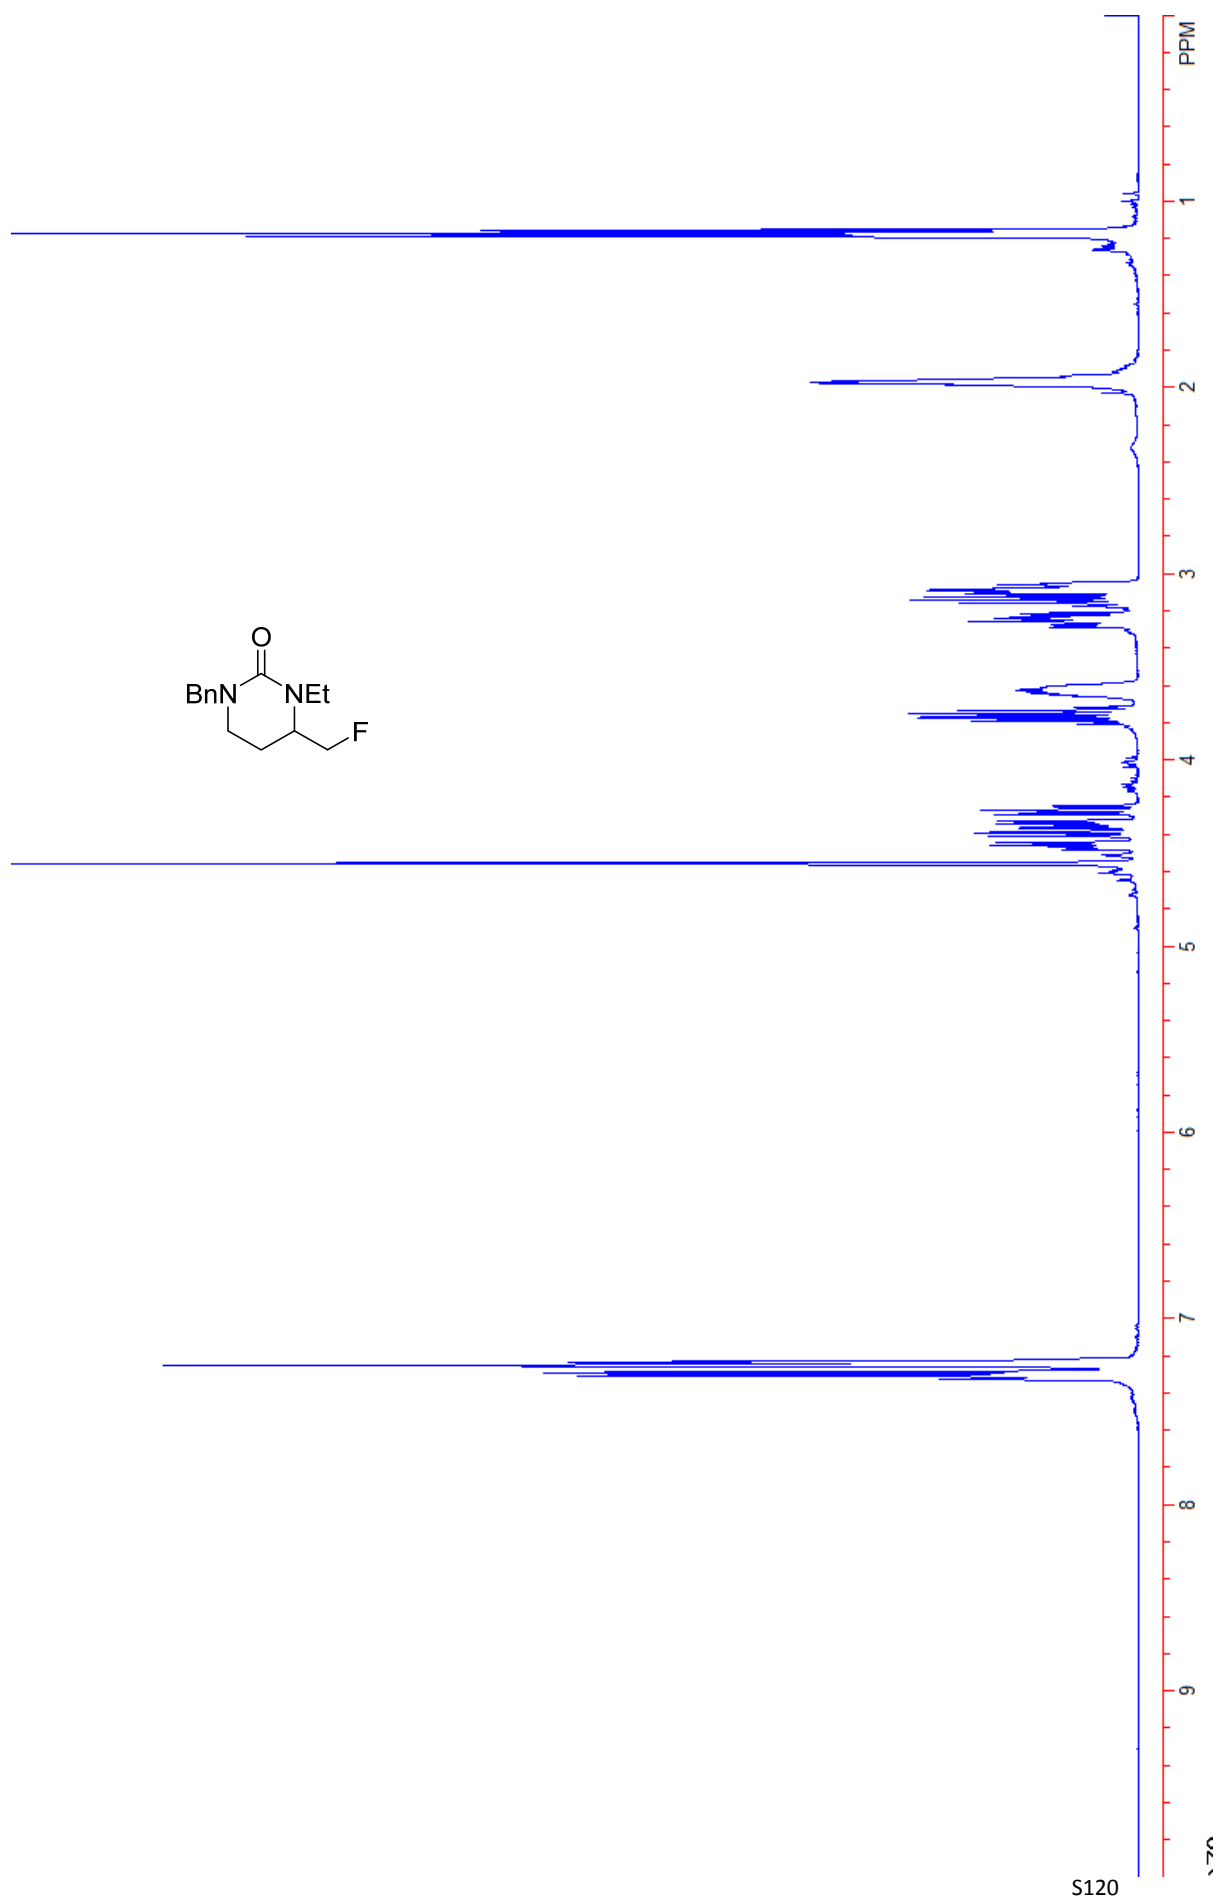

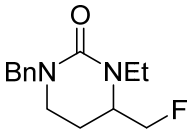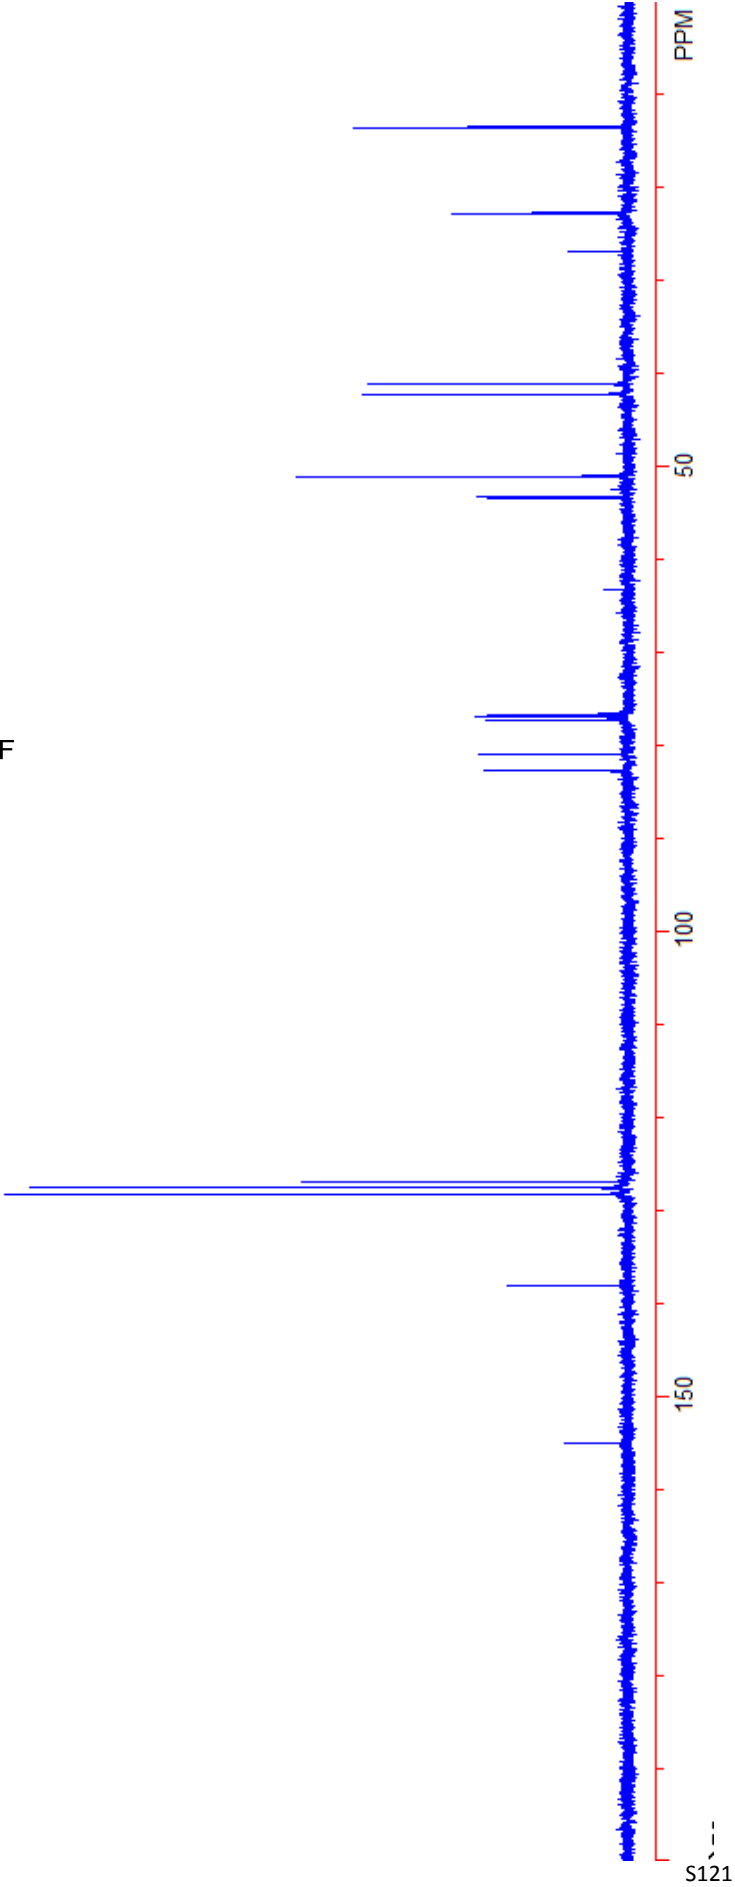

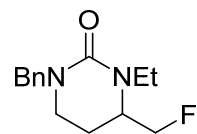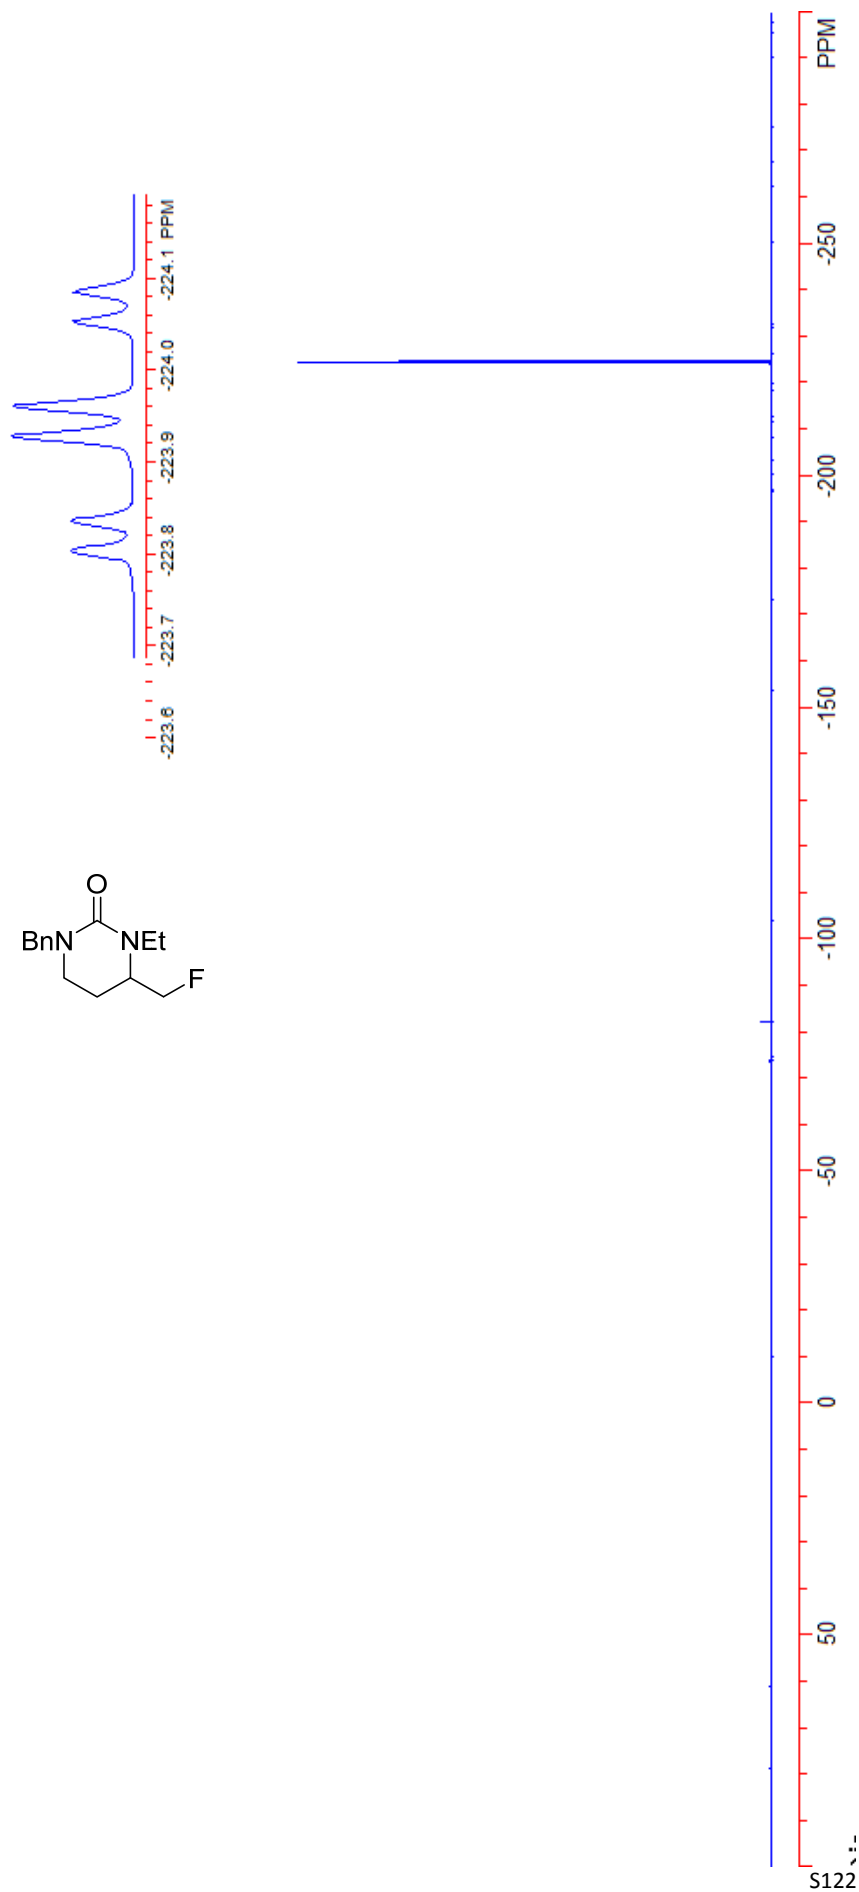



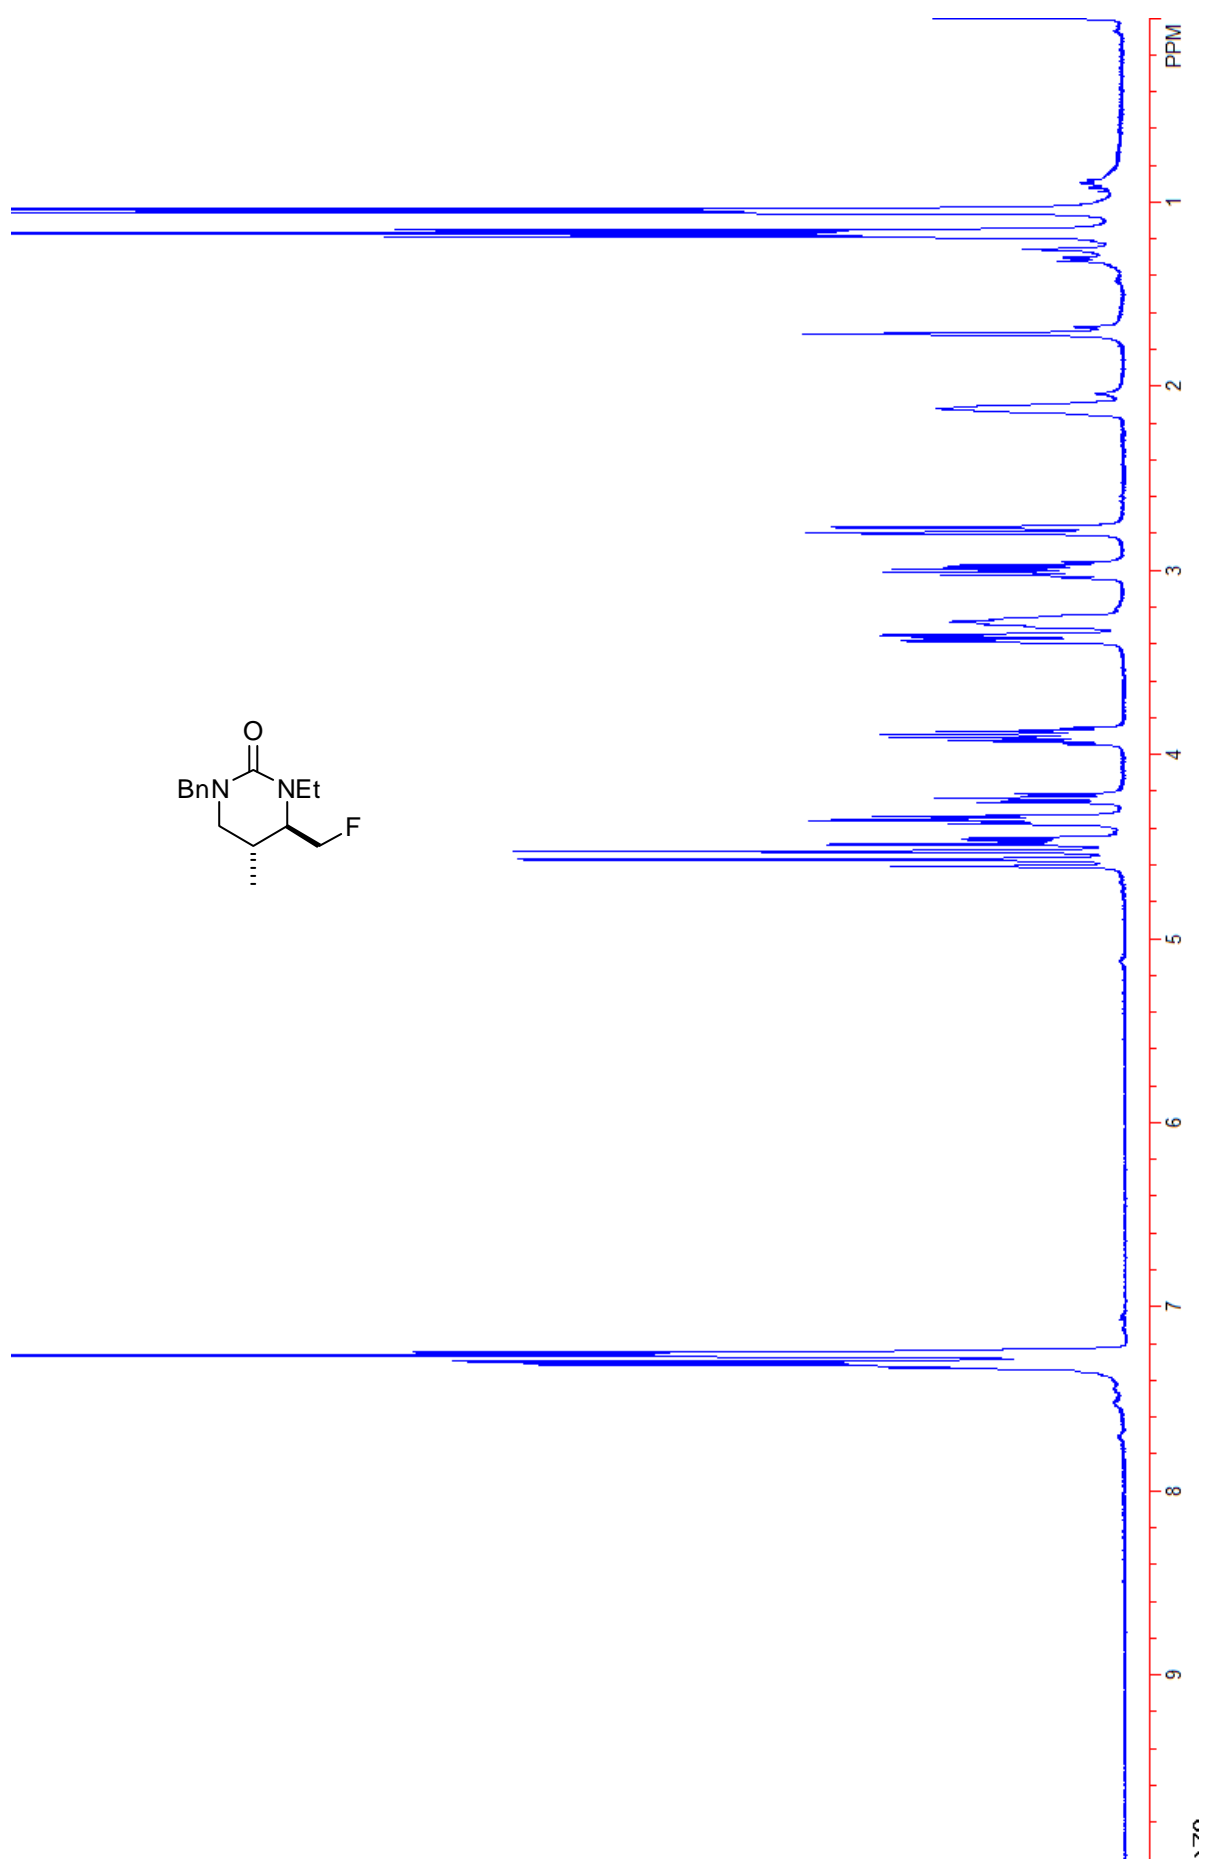

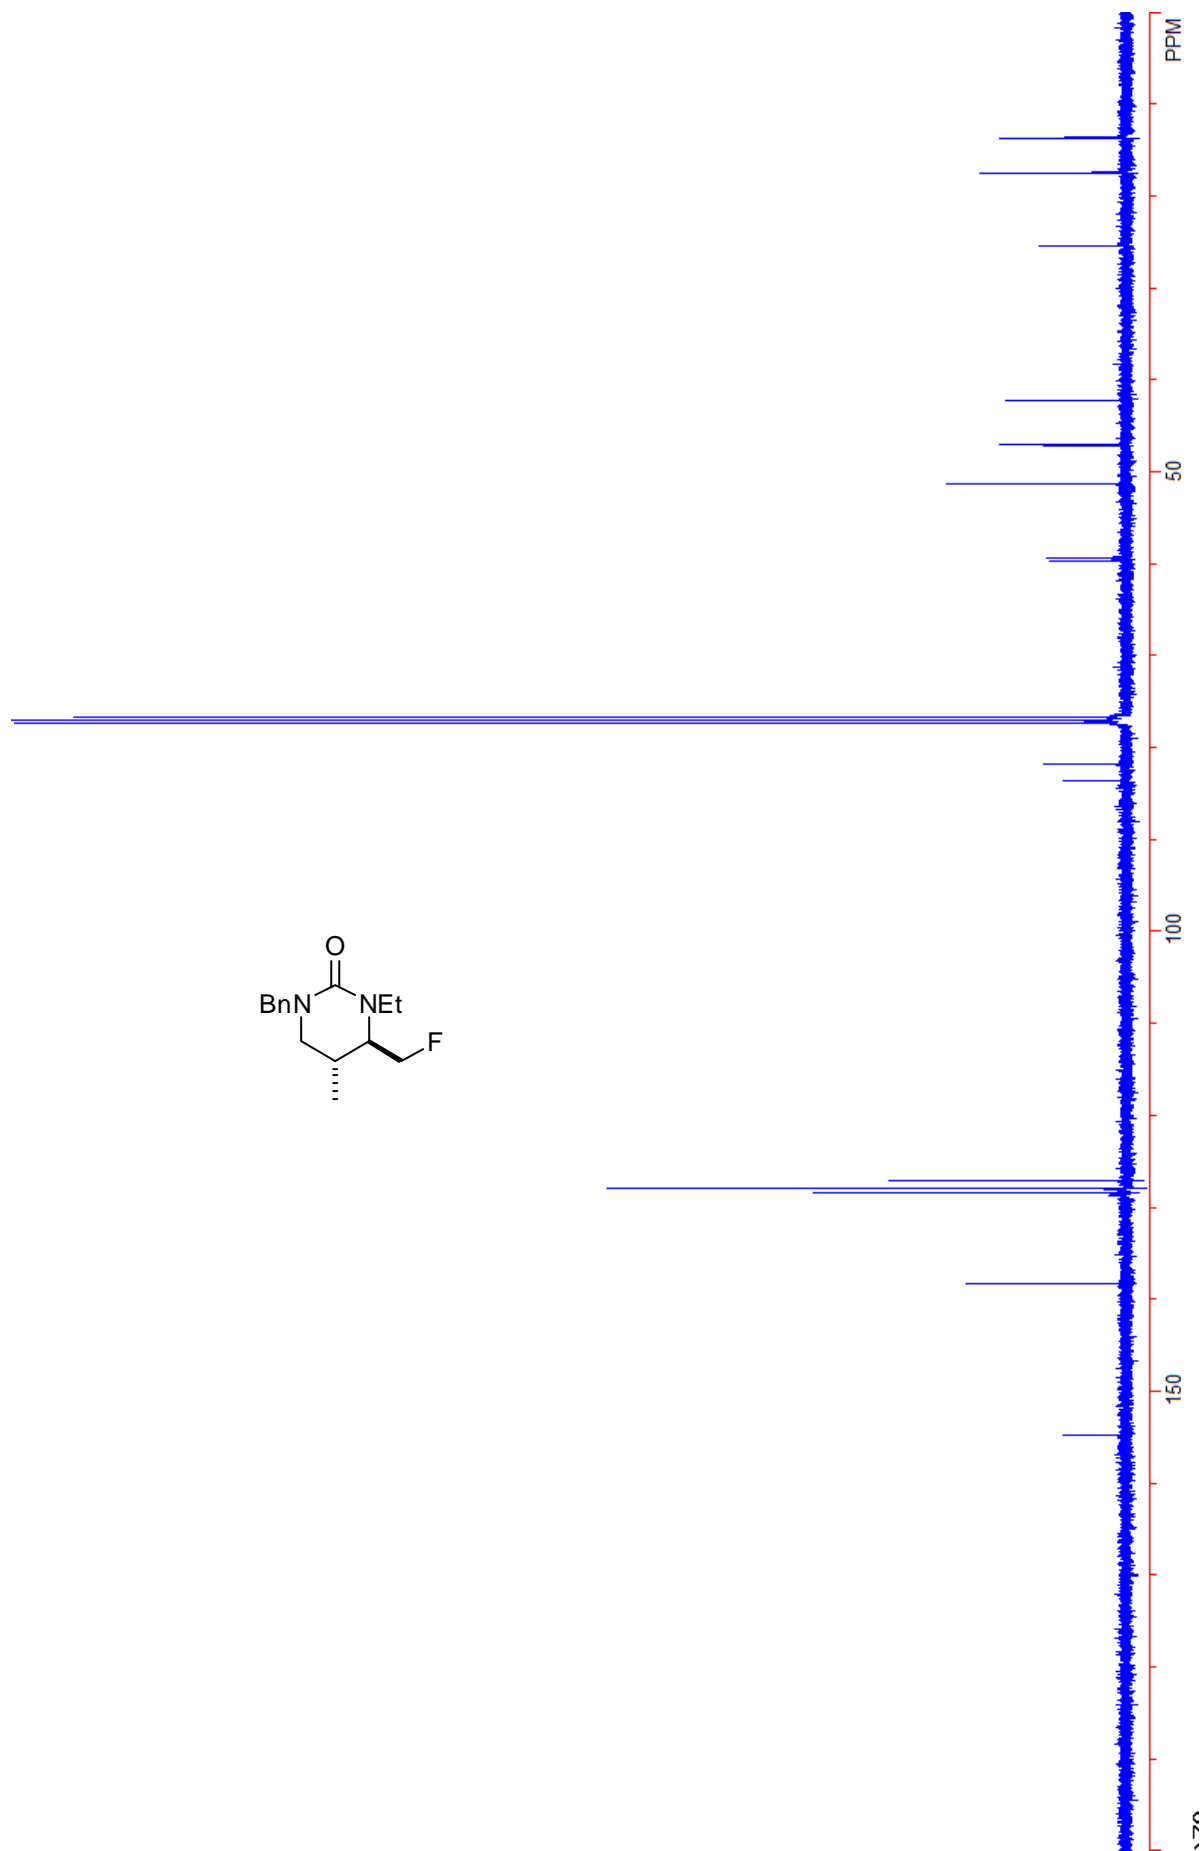

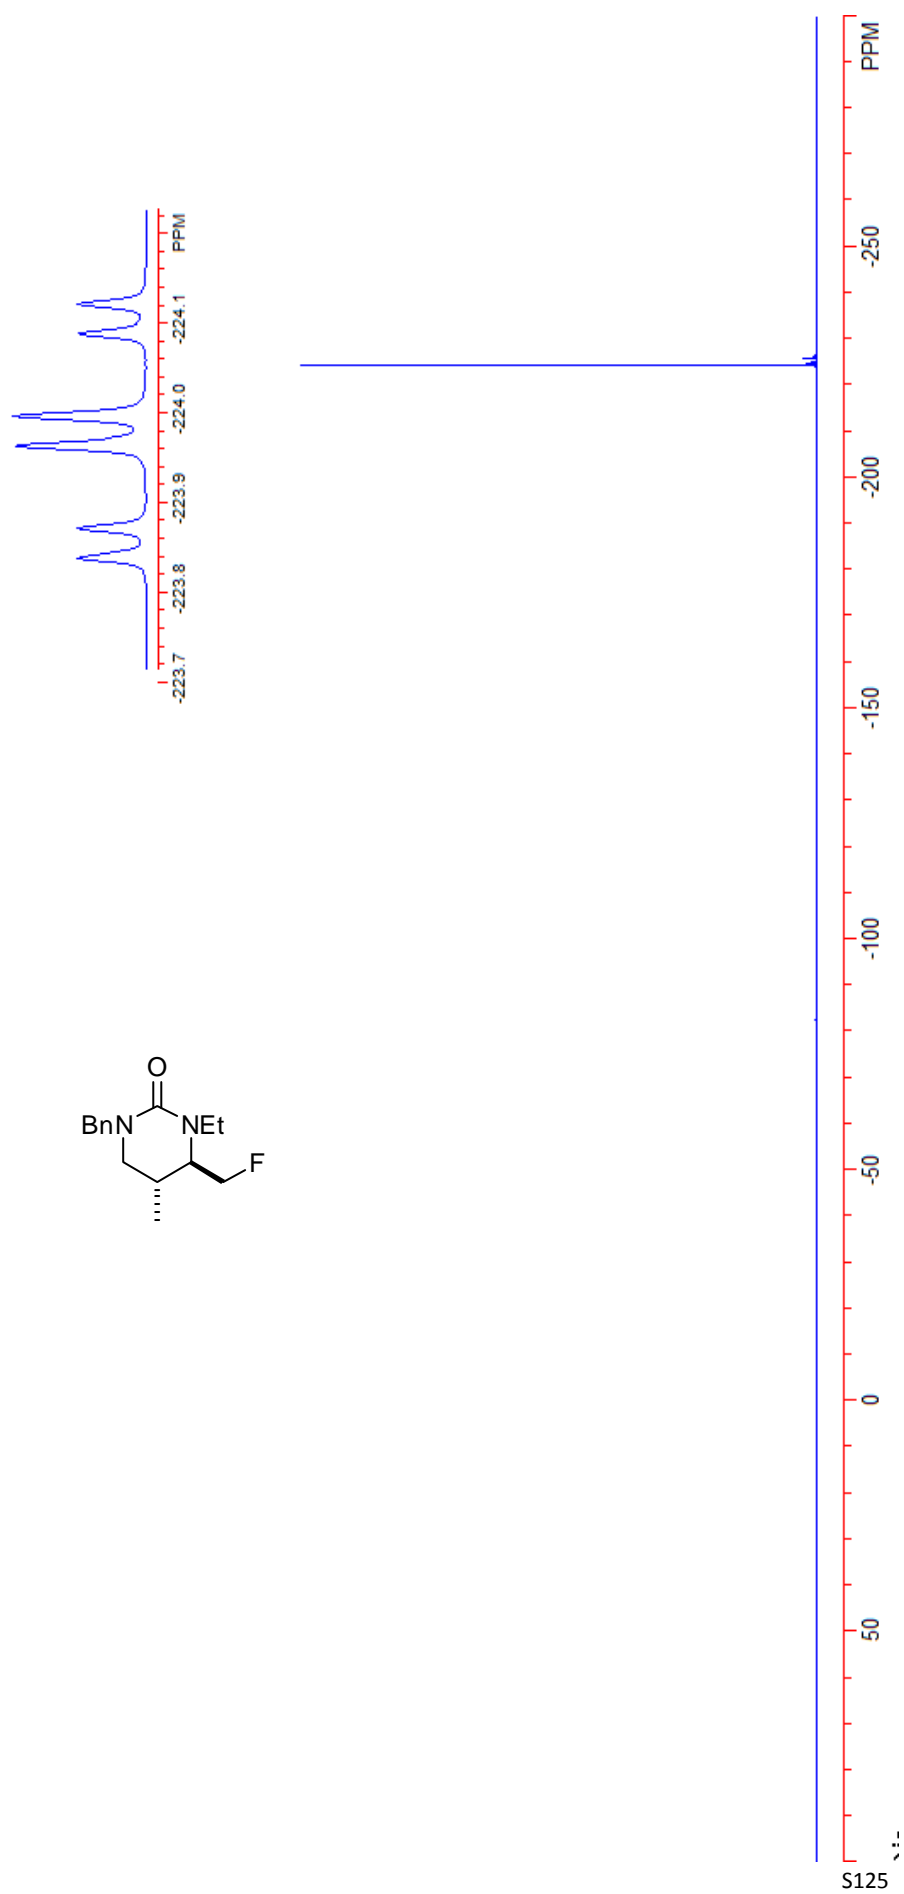

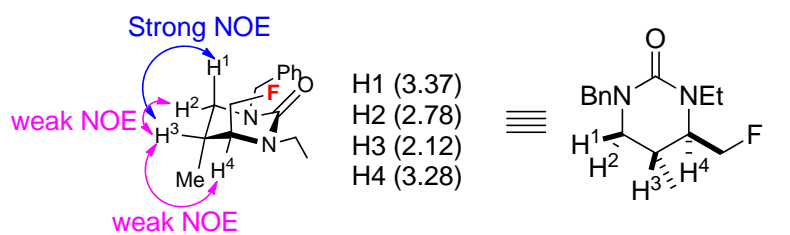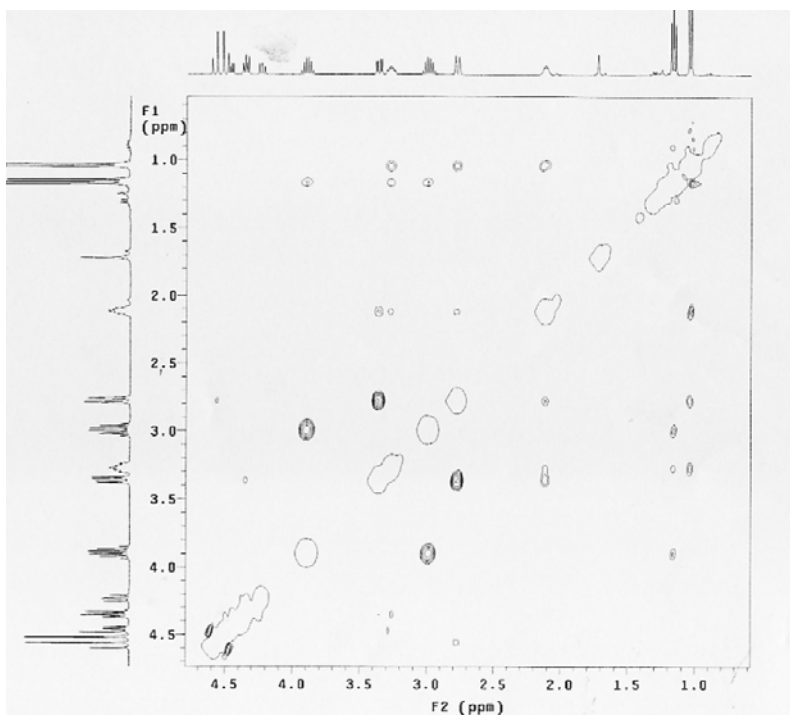

H-H NOESY Spectrum

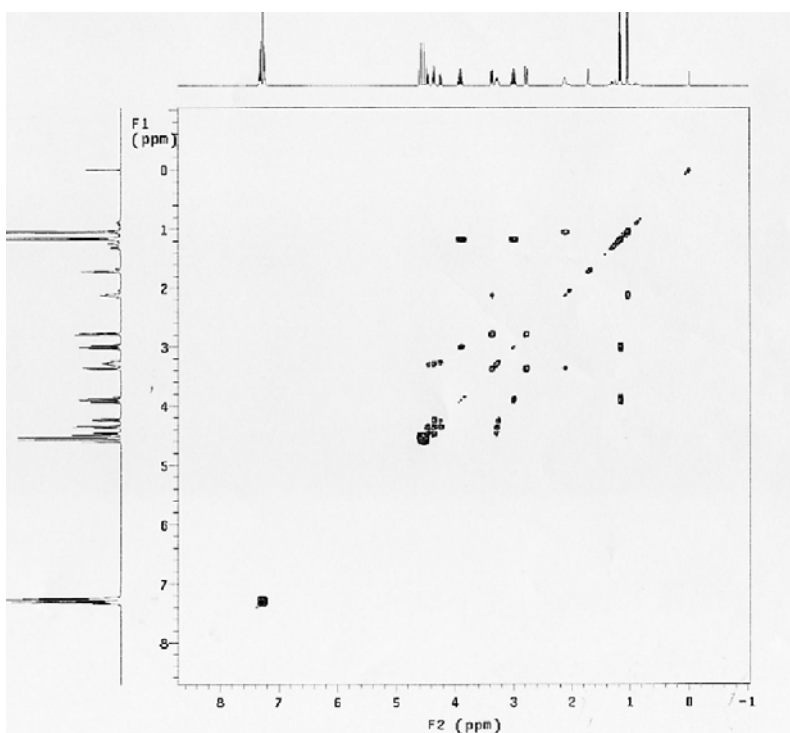

H-H COSY Spectrum

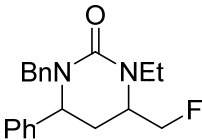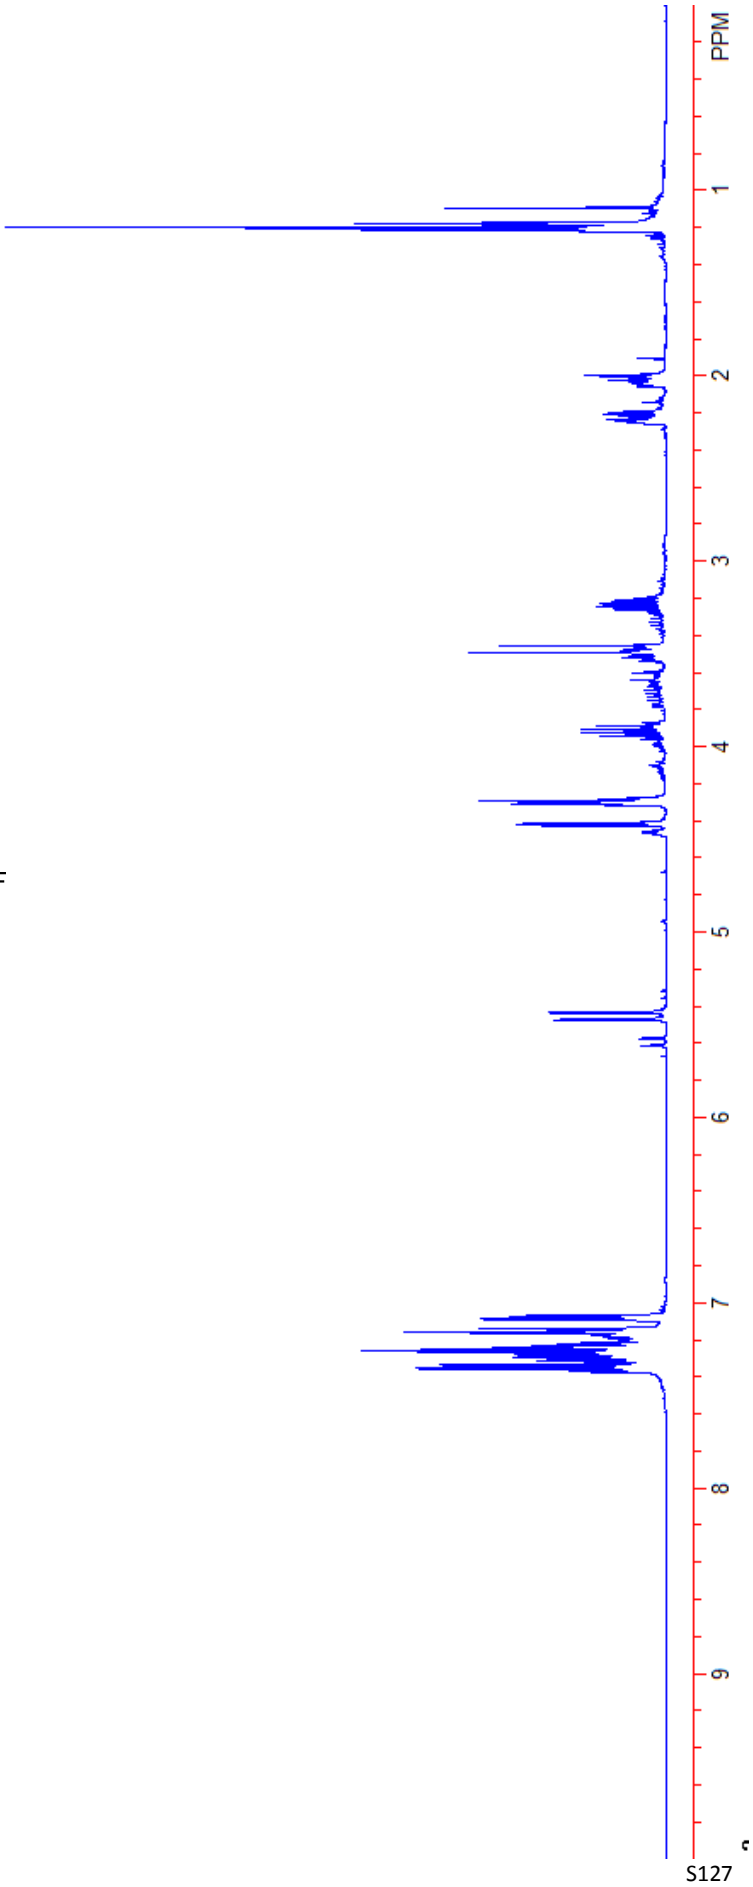

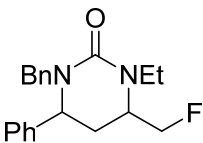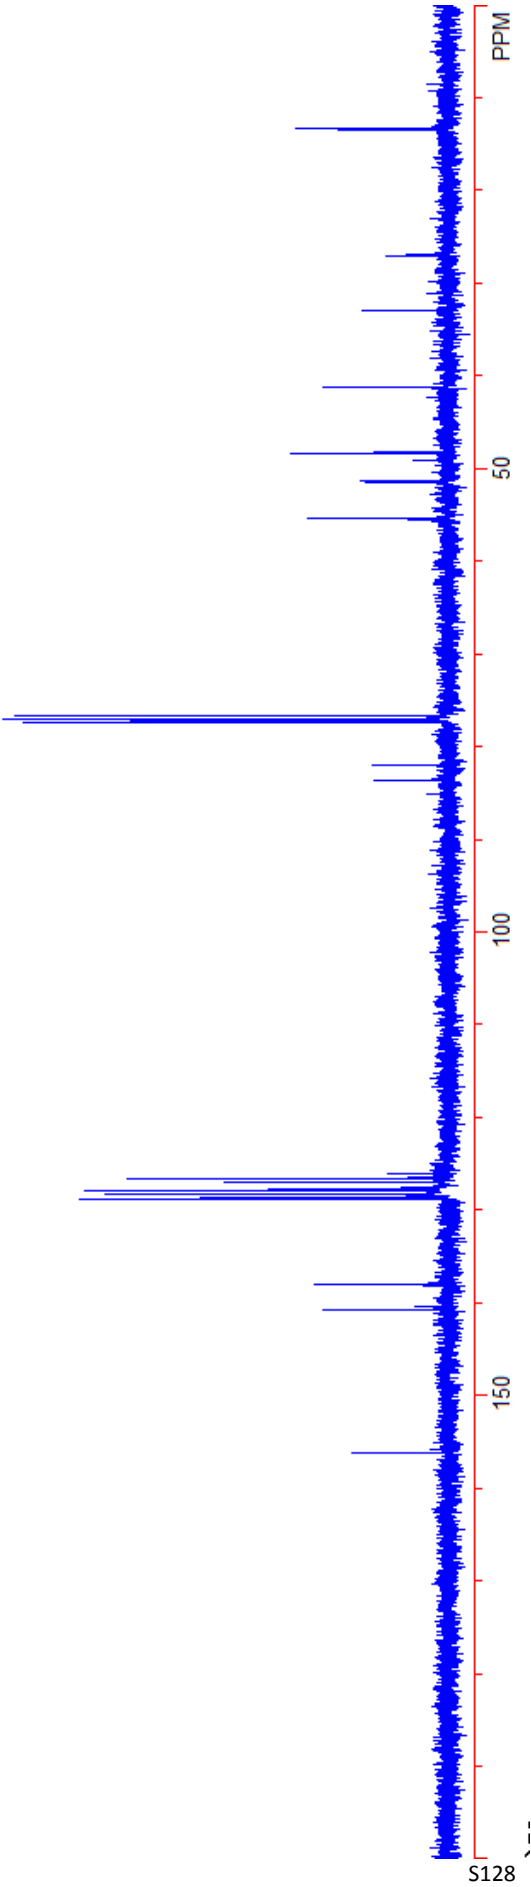

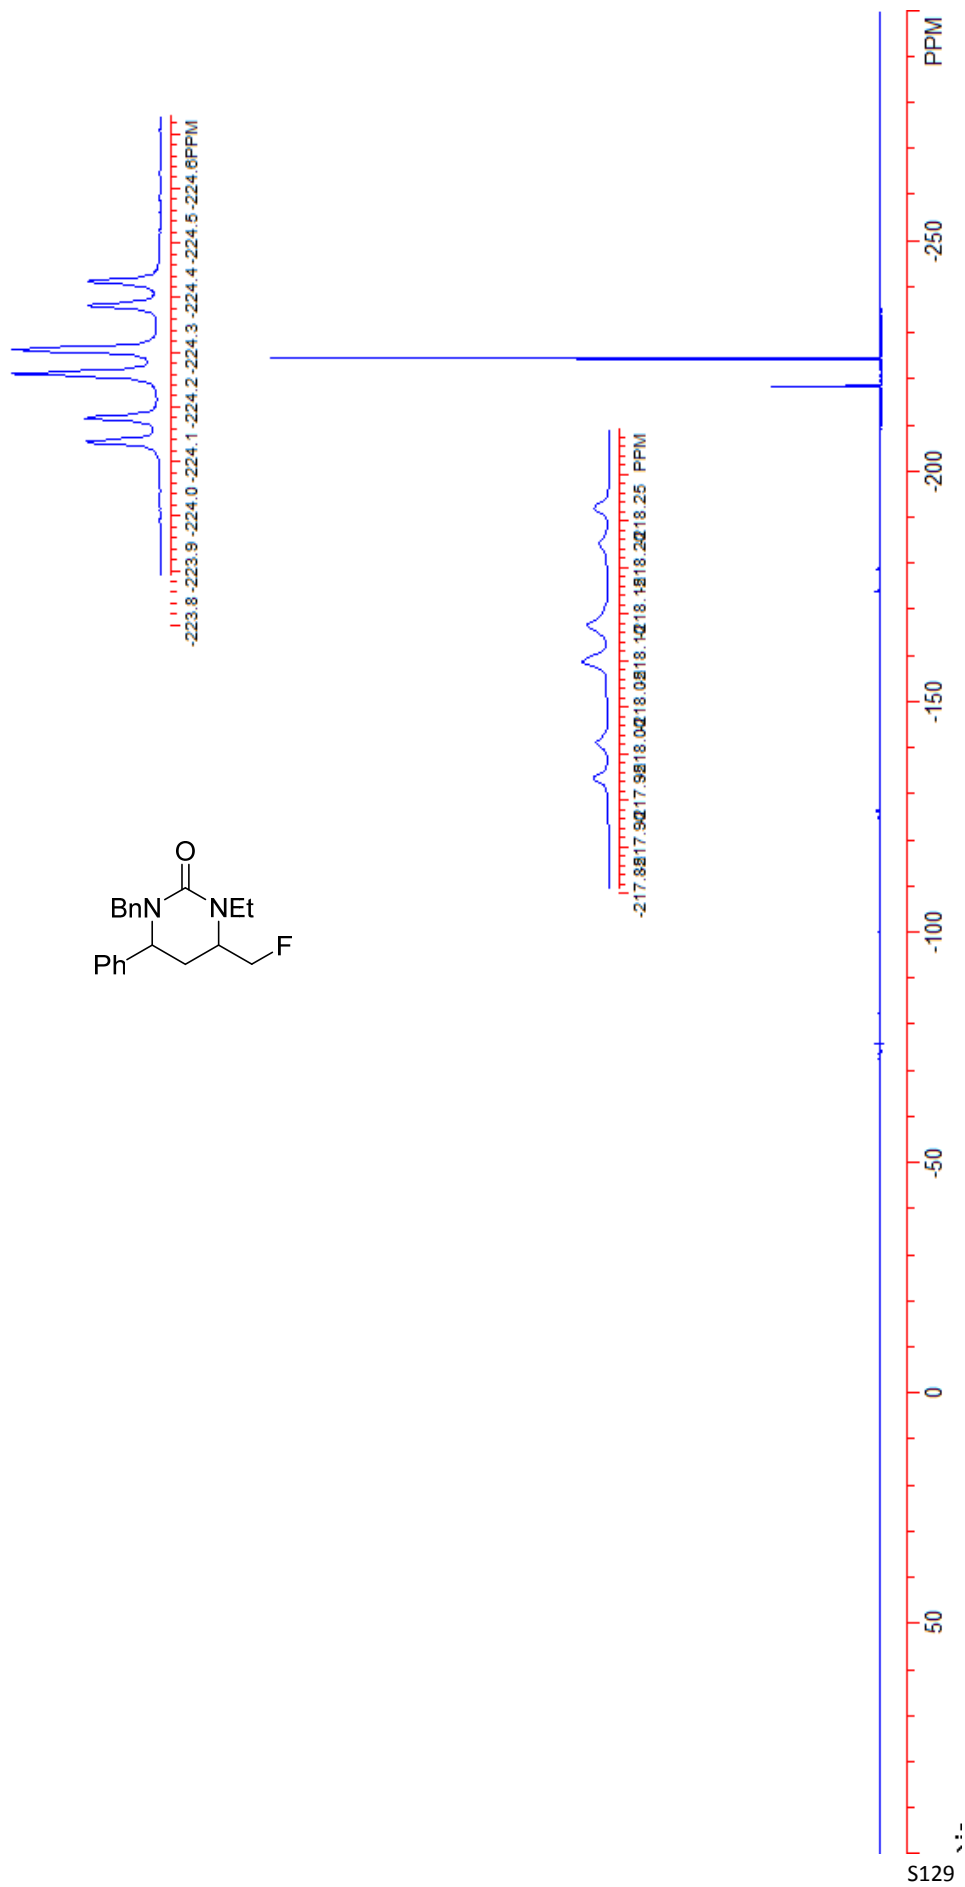

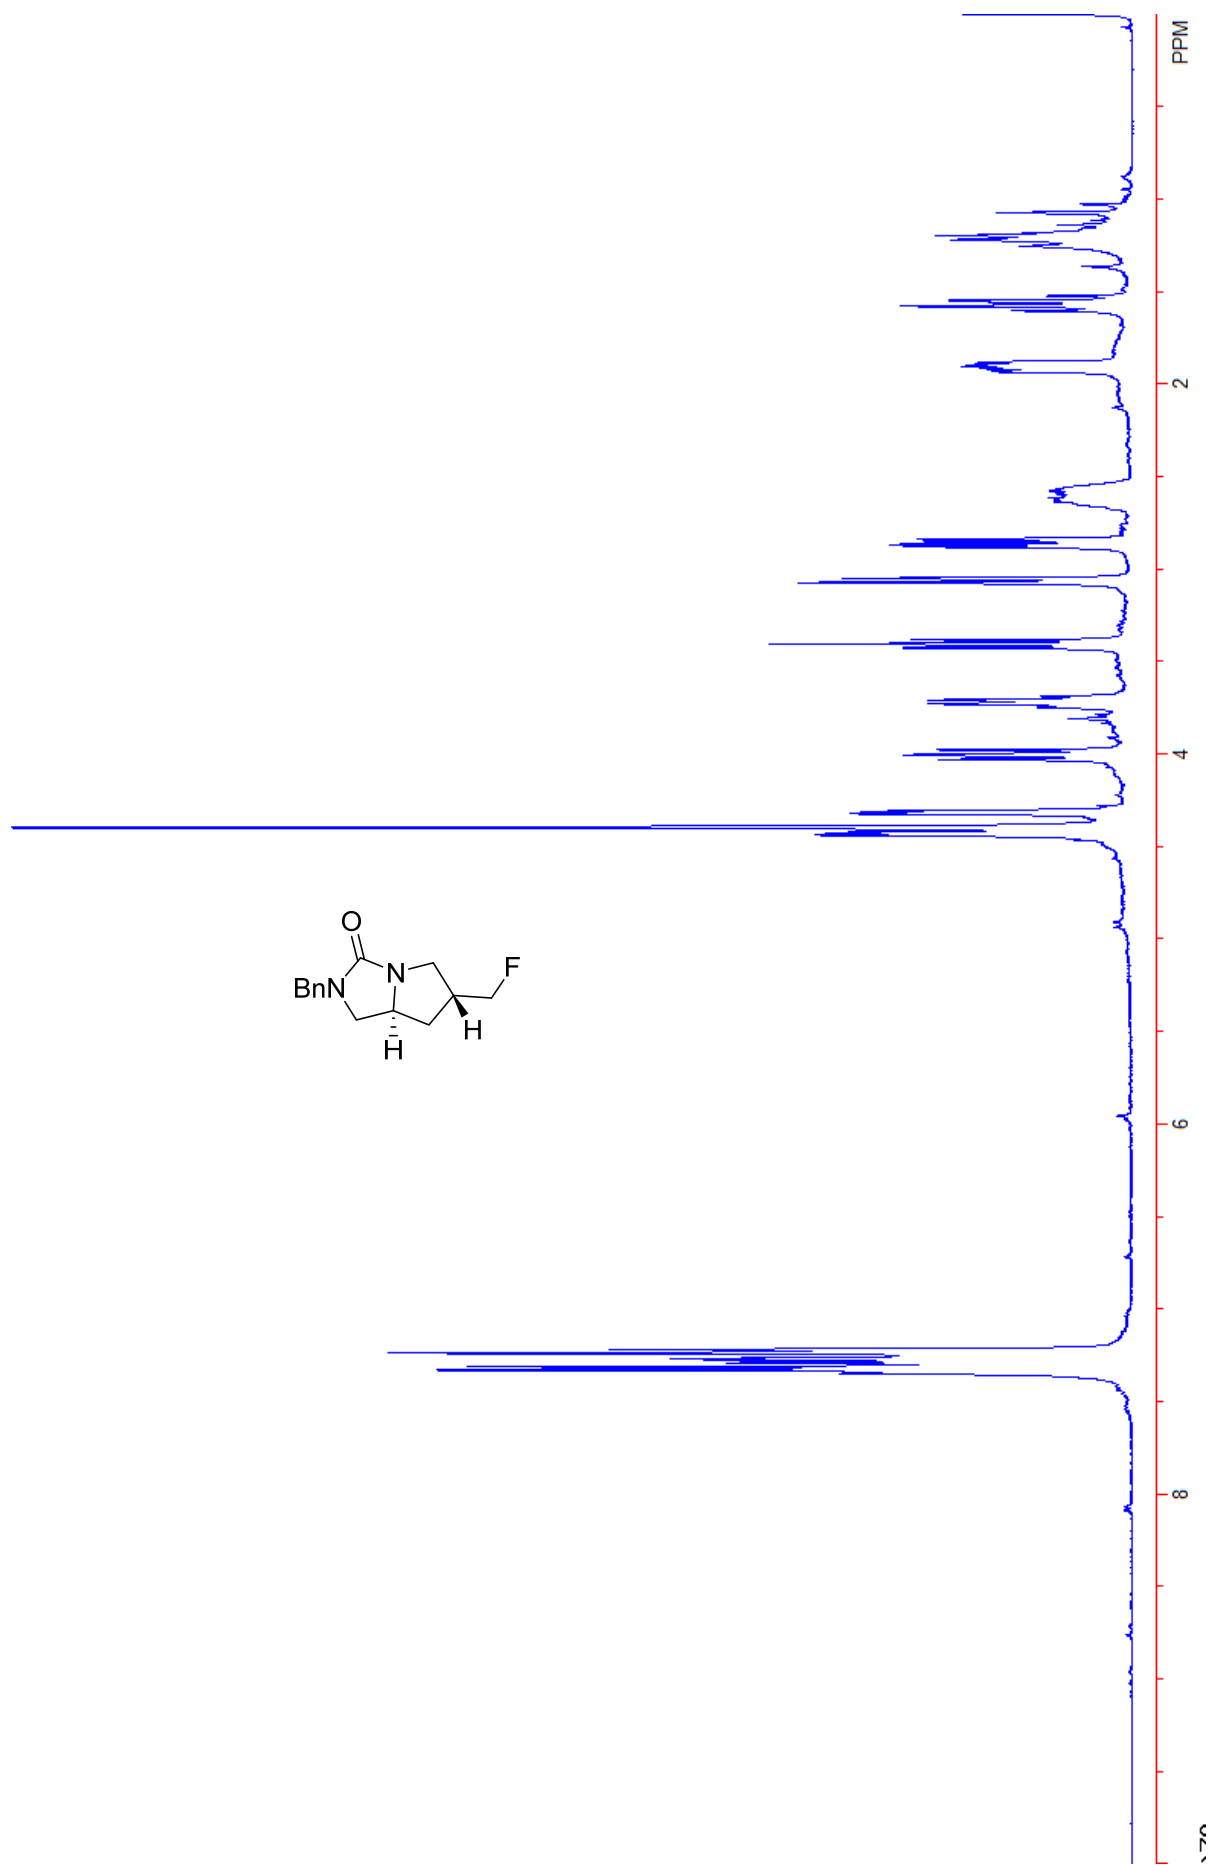



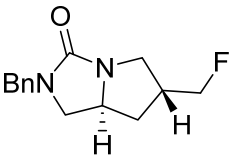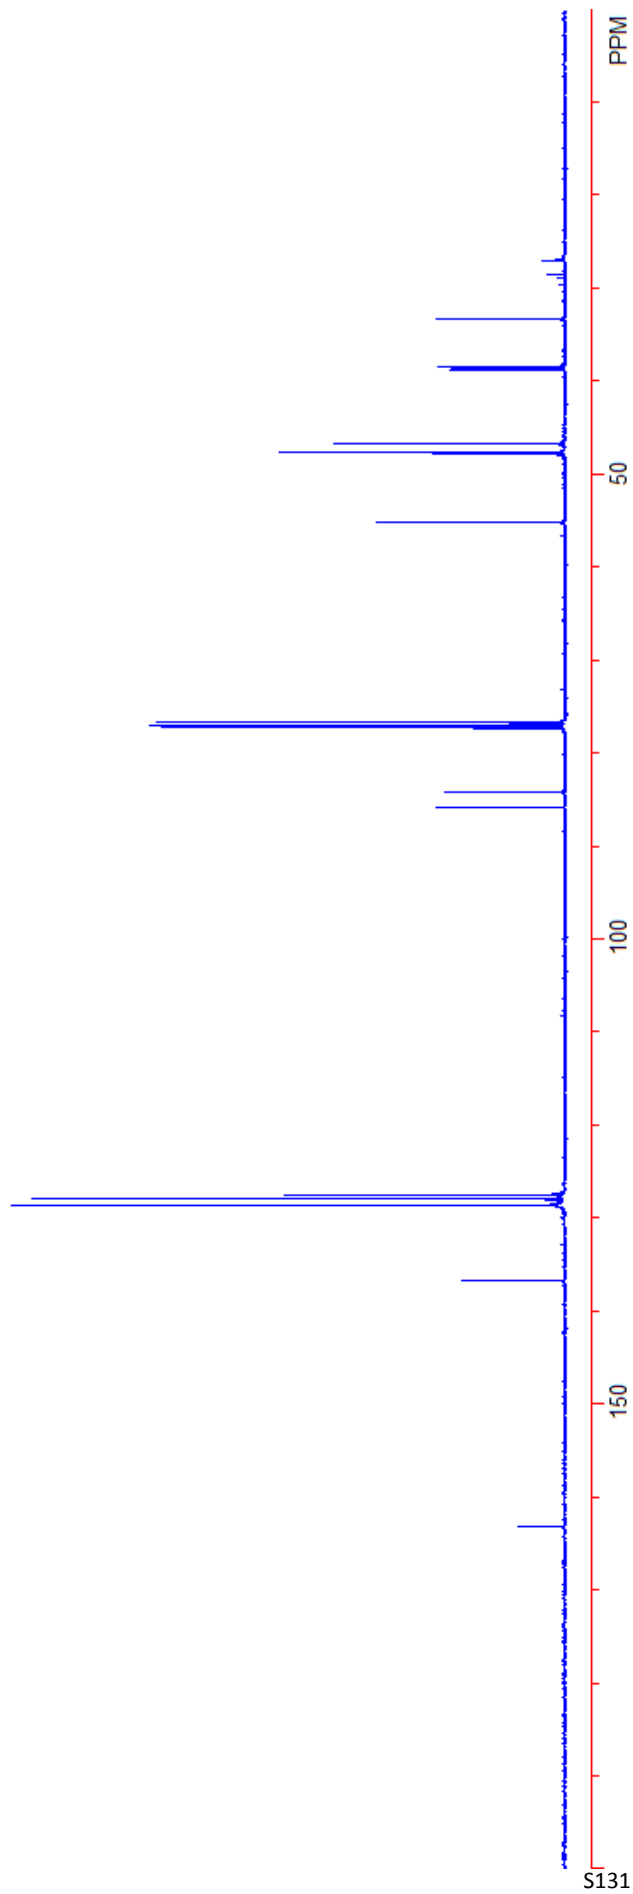

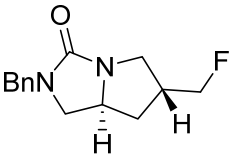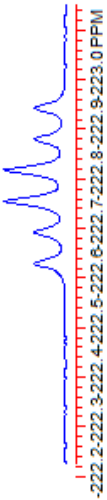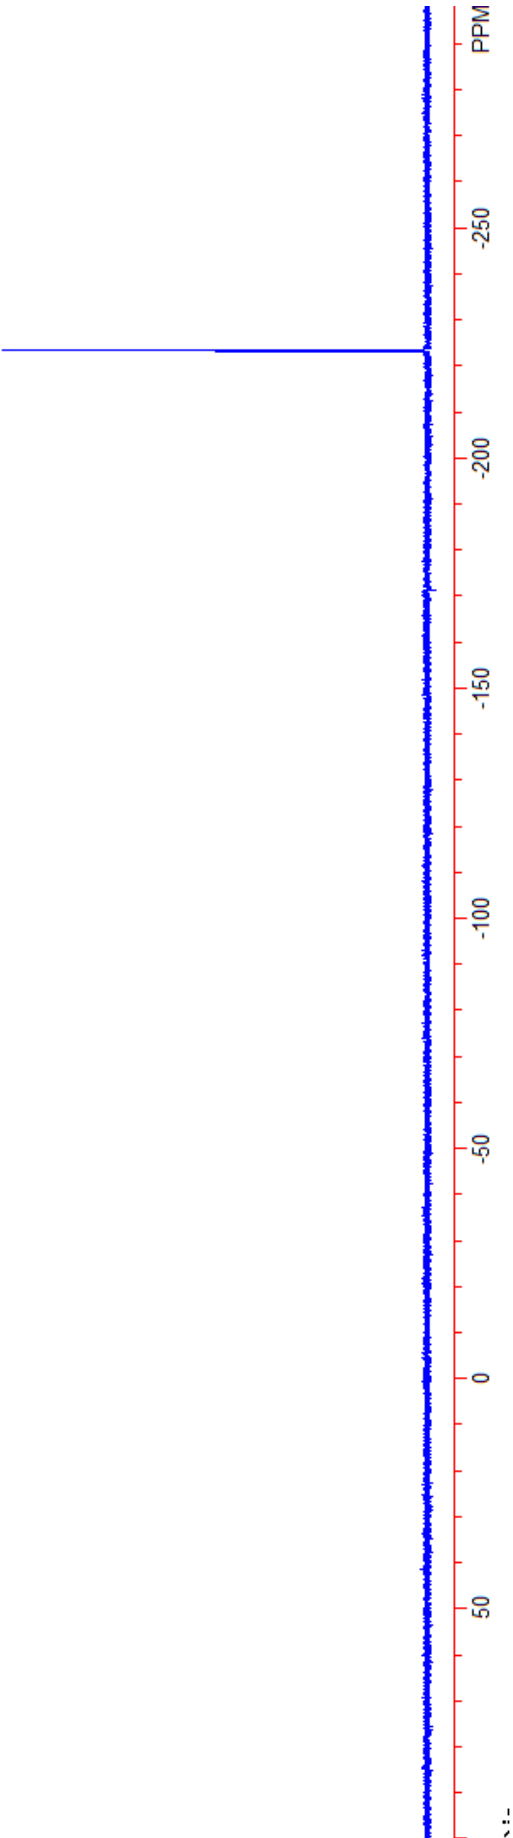

Supplement: c3cc44711a_2.pdf [file c3cc44711a_2.pdf]
